# Supplementary material
Source: MDPI journal article supplement (https://www.mdpi.com/2072-4292/12/16/2549)

# A apus

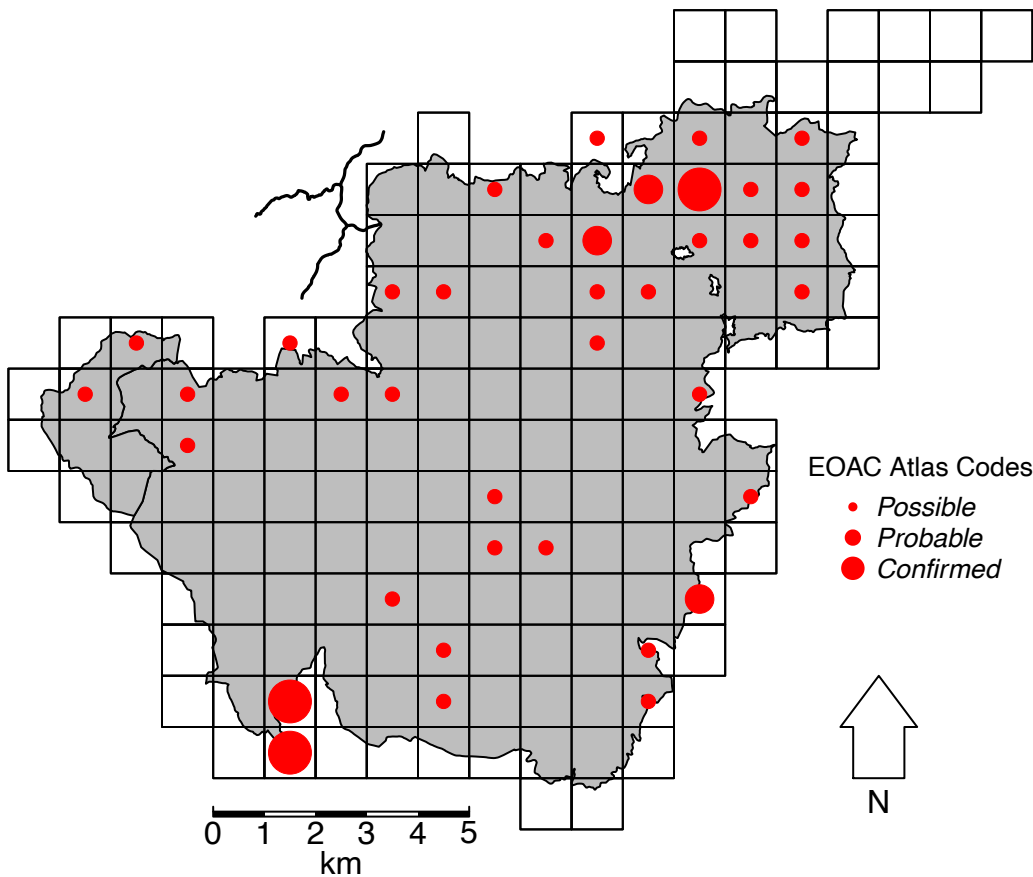

# A arven

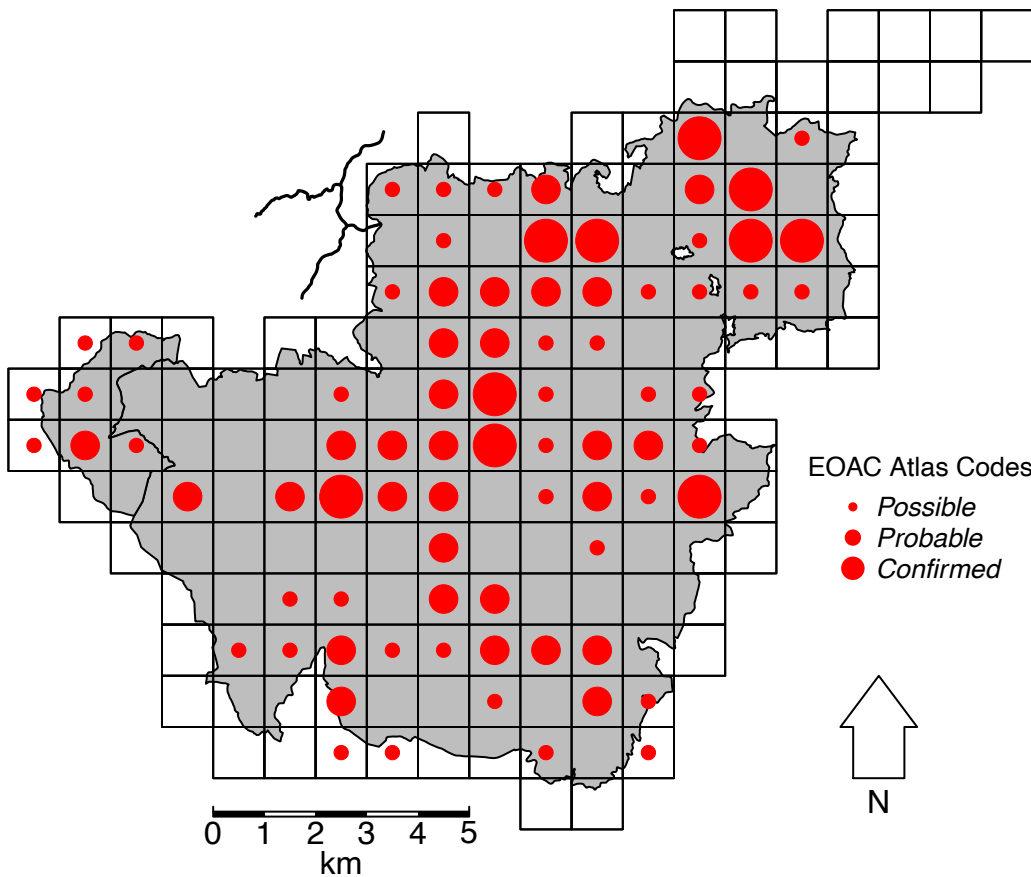

# A caud

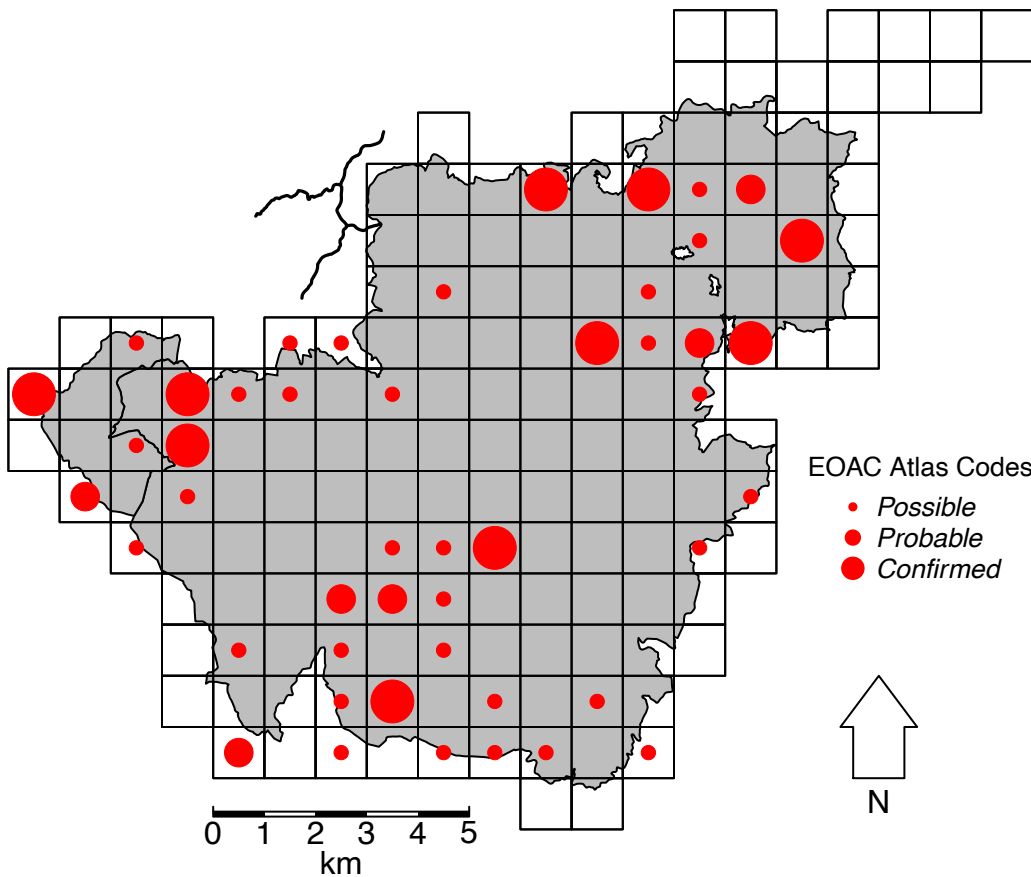

# A chrysaet

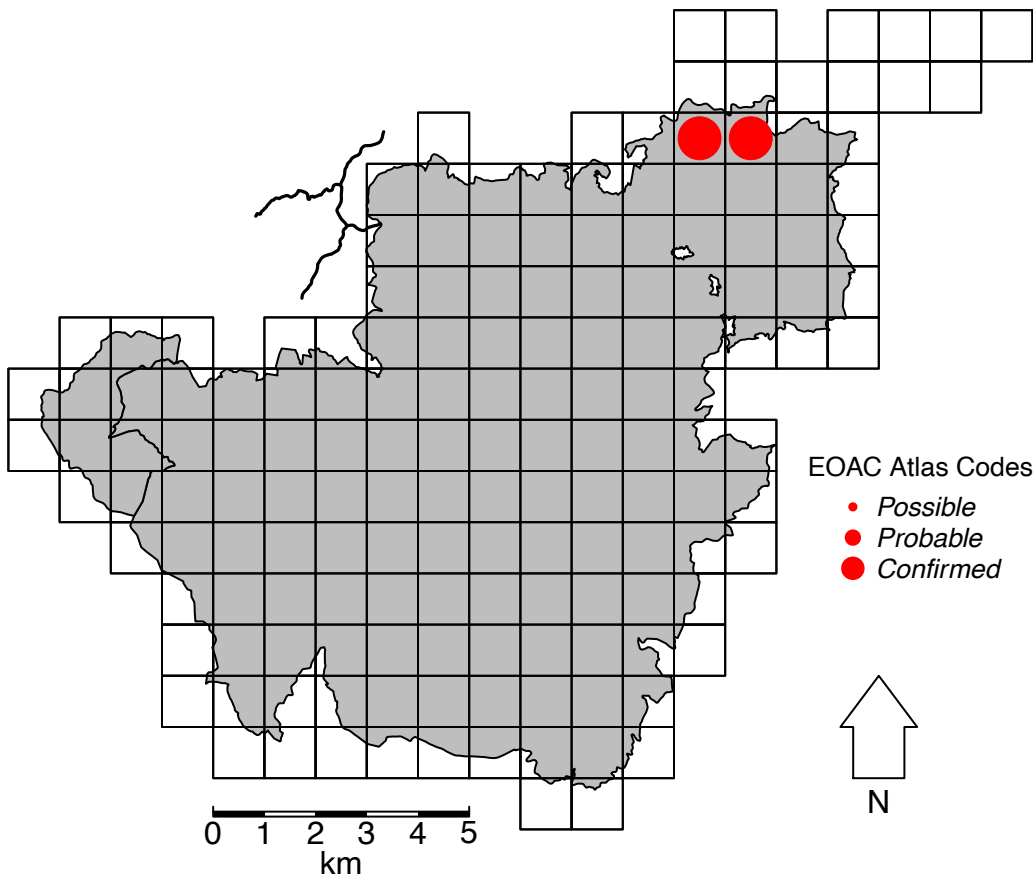

# A hypoleucos

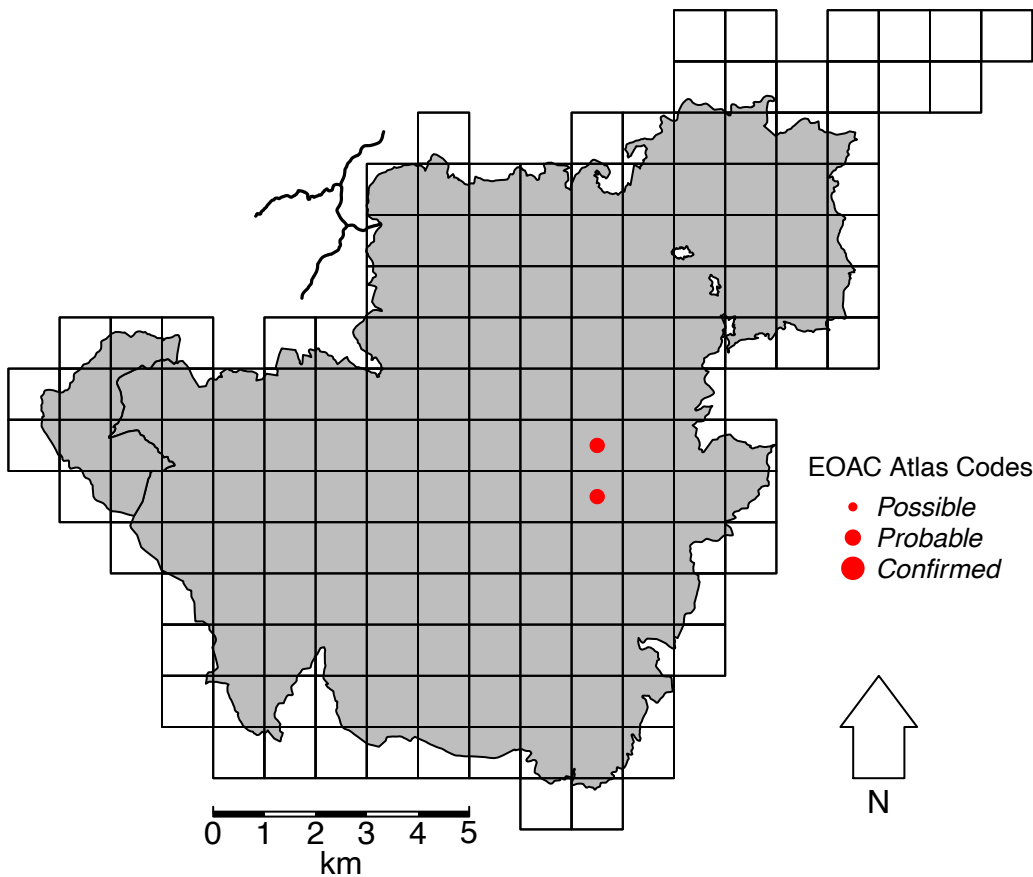

# A monachus

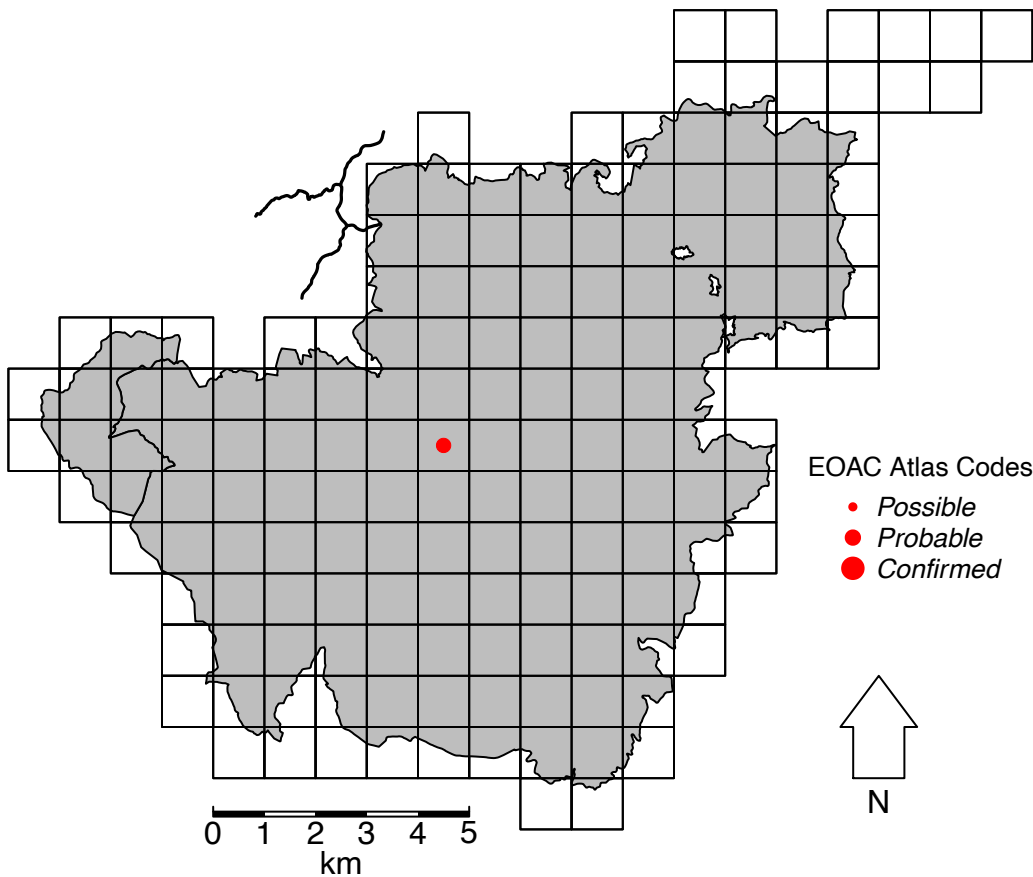

# A rufa

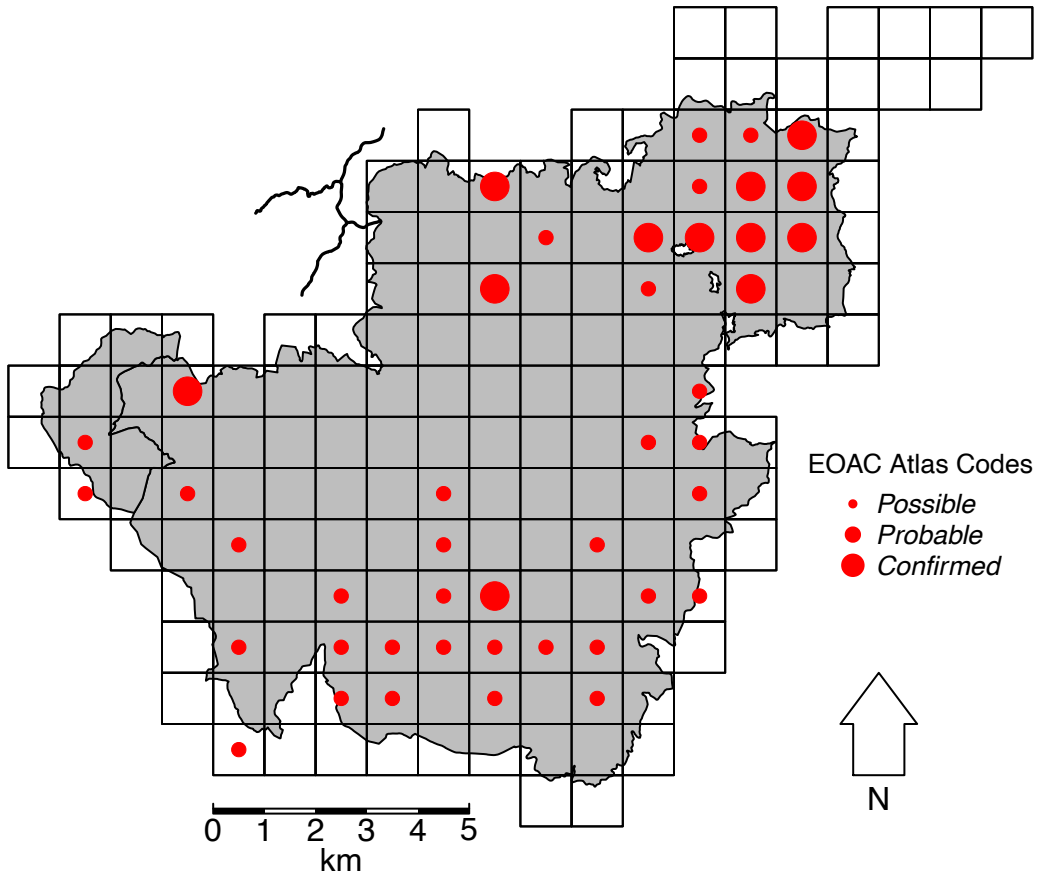

# Accip gen

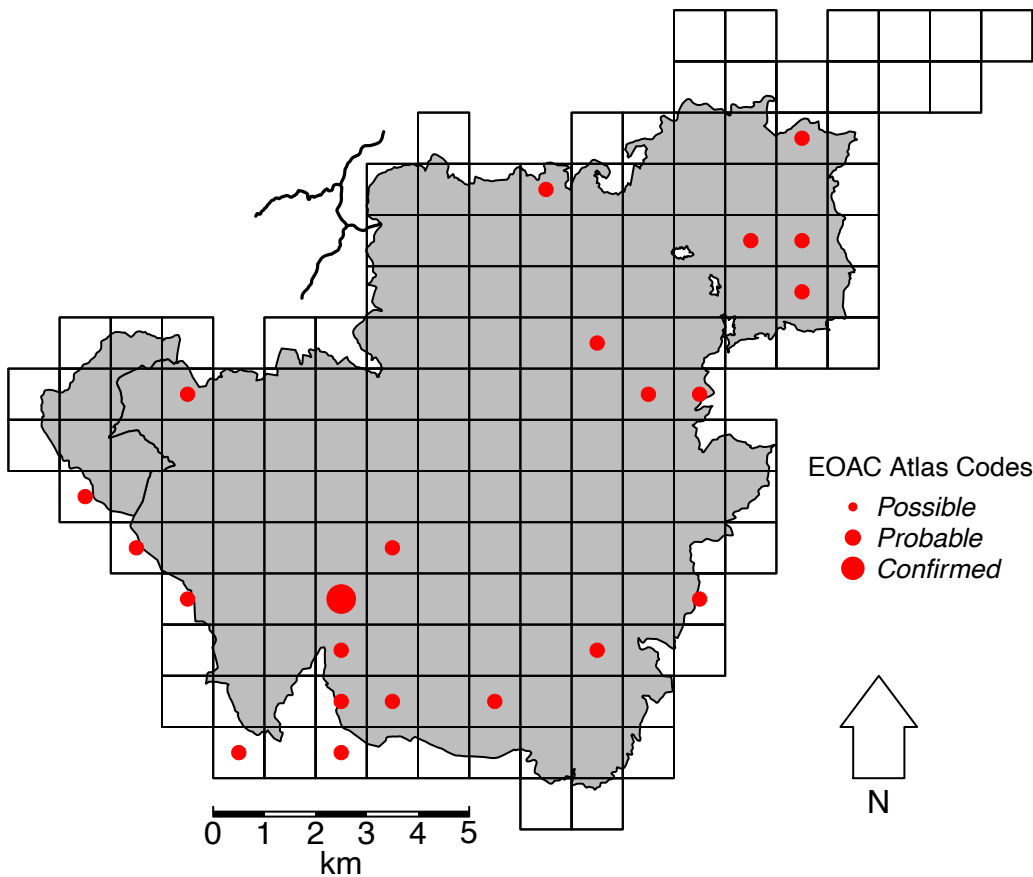

# Accip nis

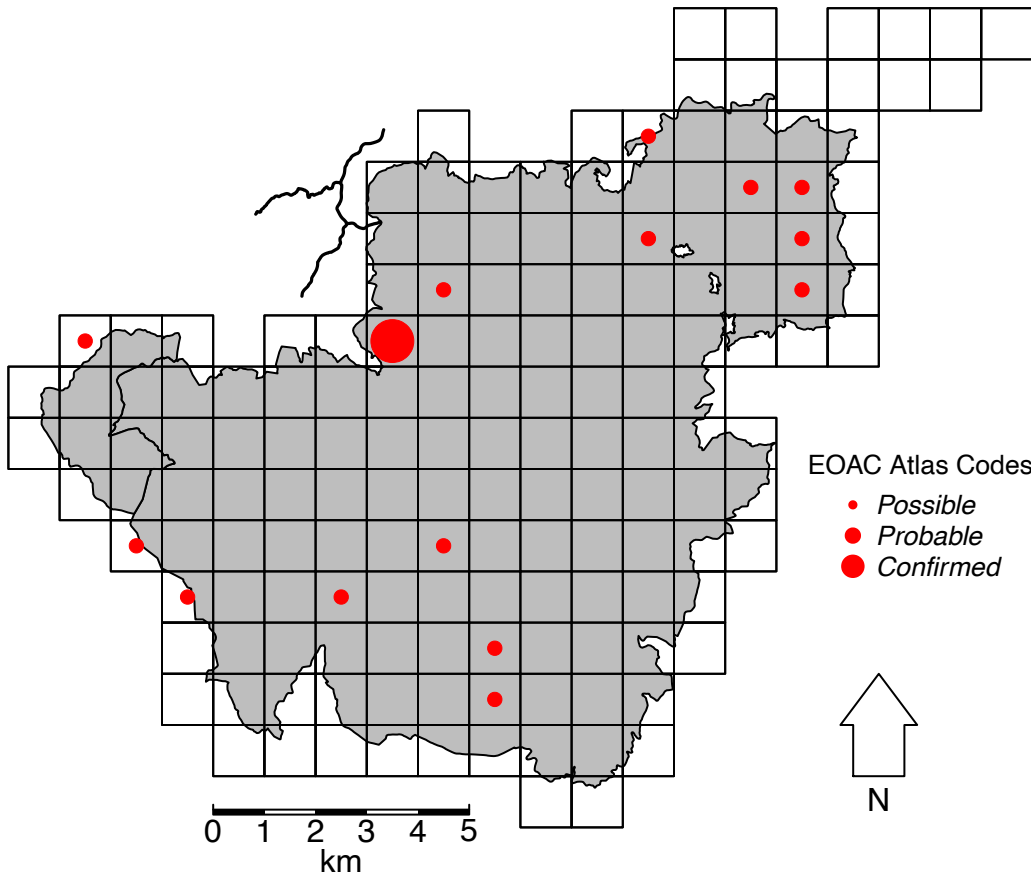

# Anas platy

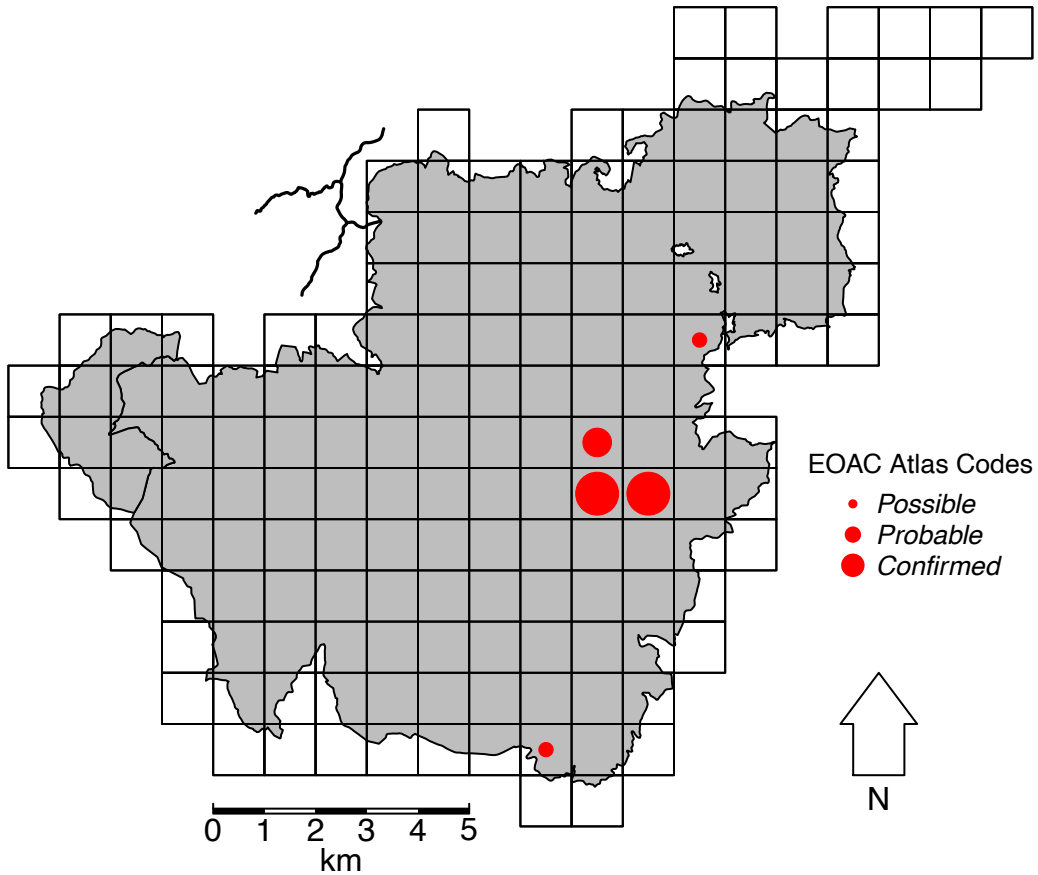

# Ant camp

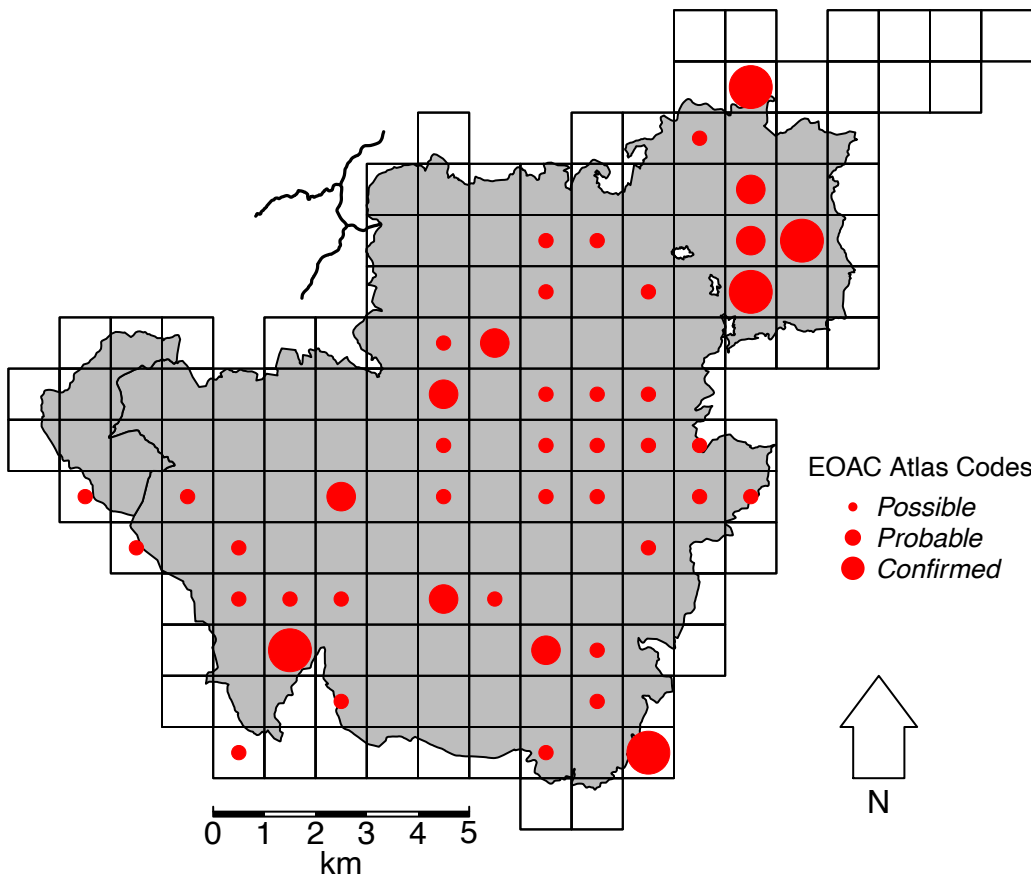

# Ant spino

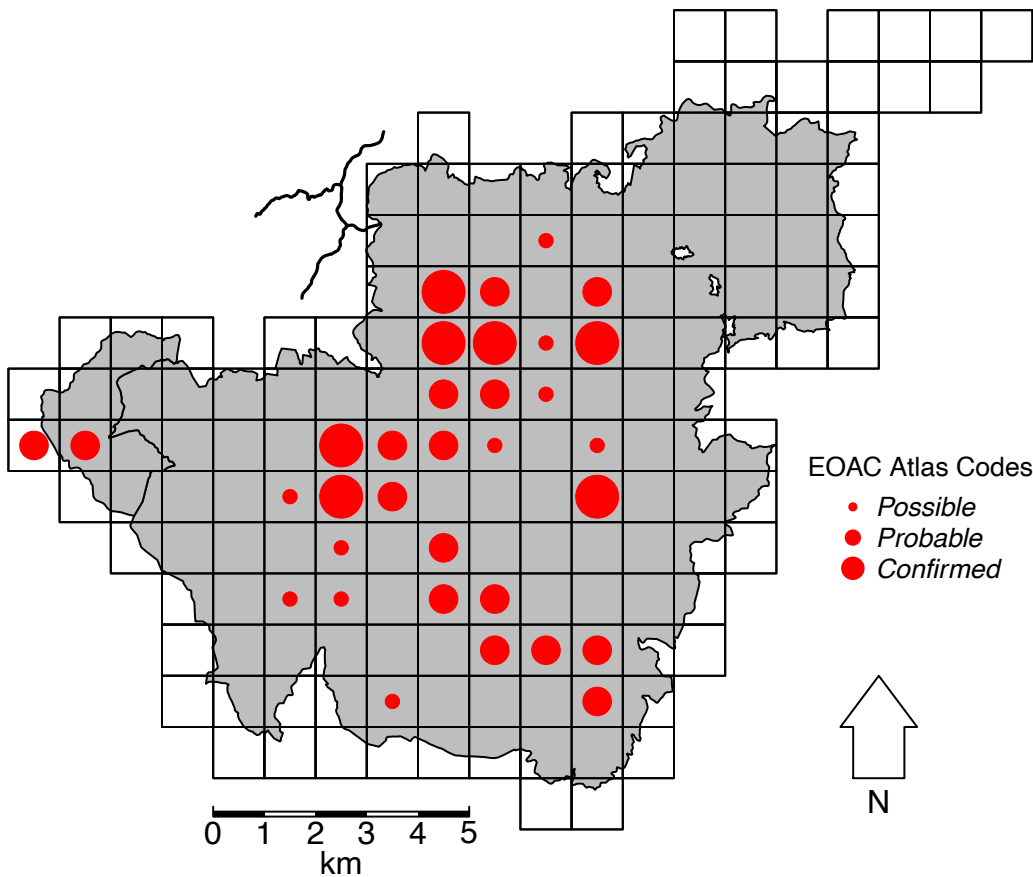

# Ant triv

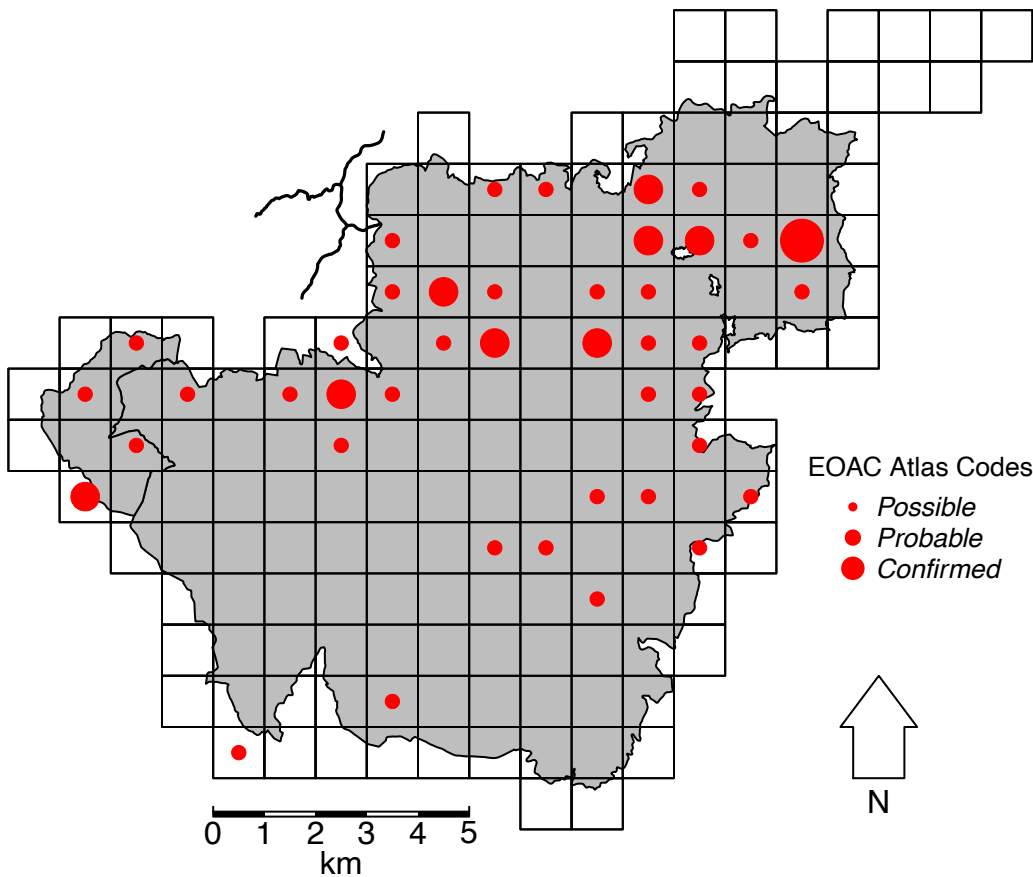

# Ardea cinerea

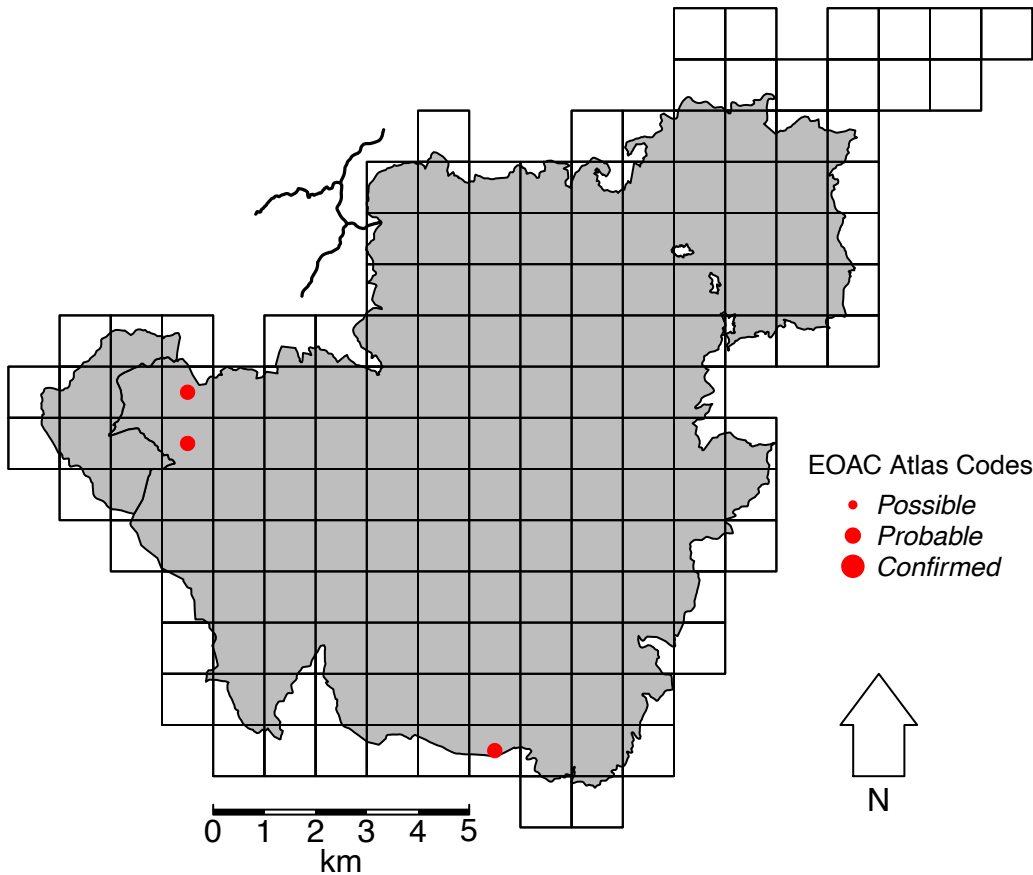

# At noctua

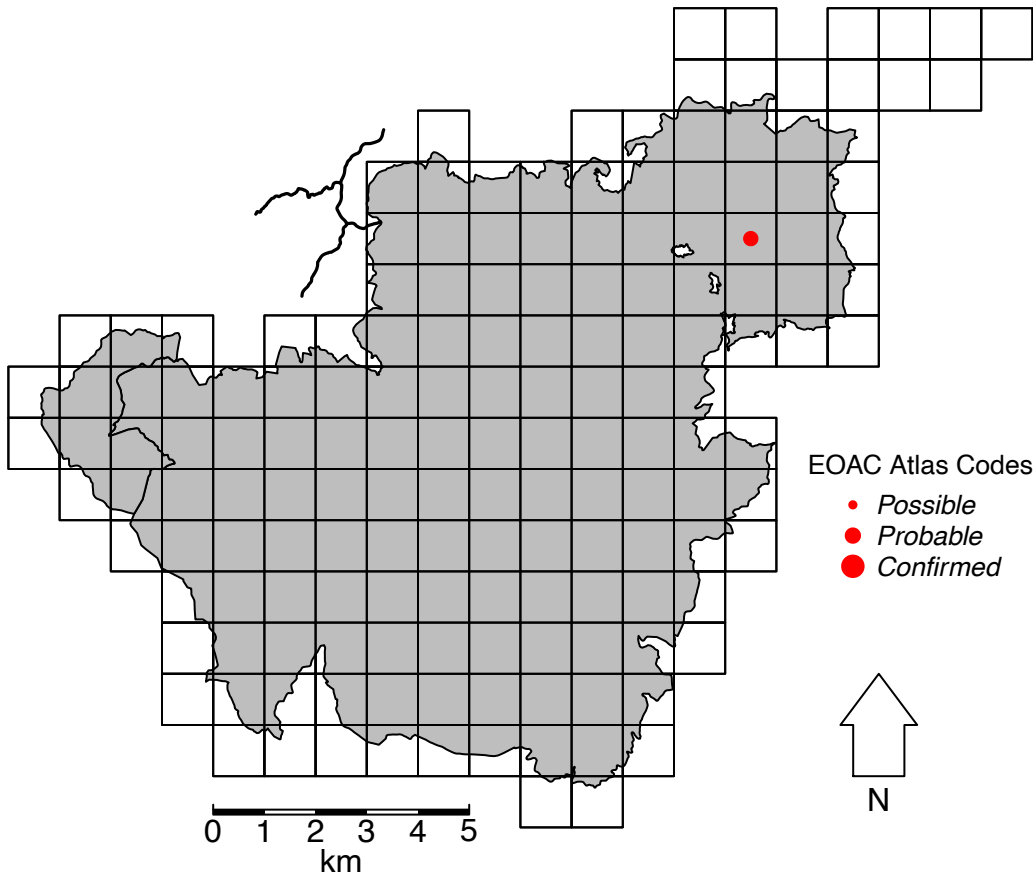

# B buteo

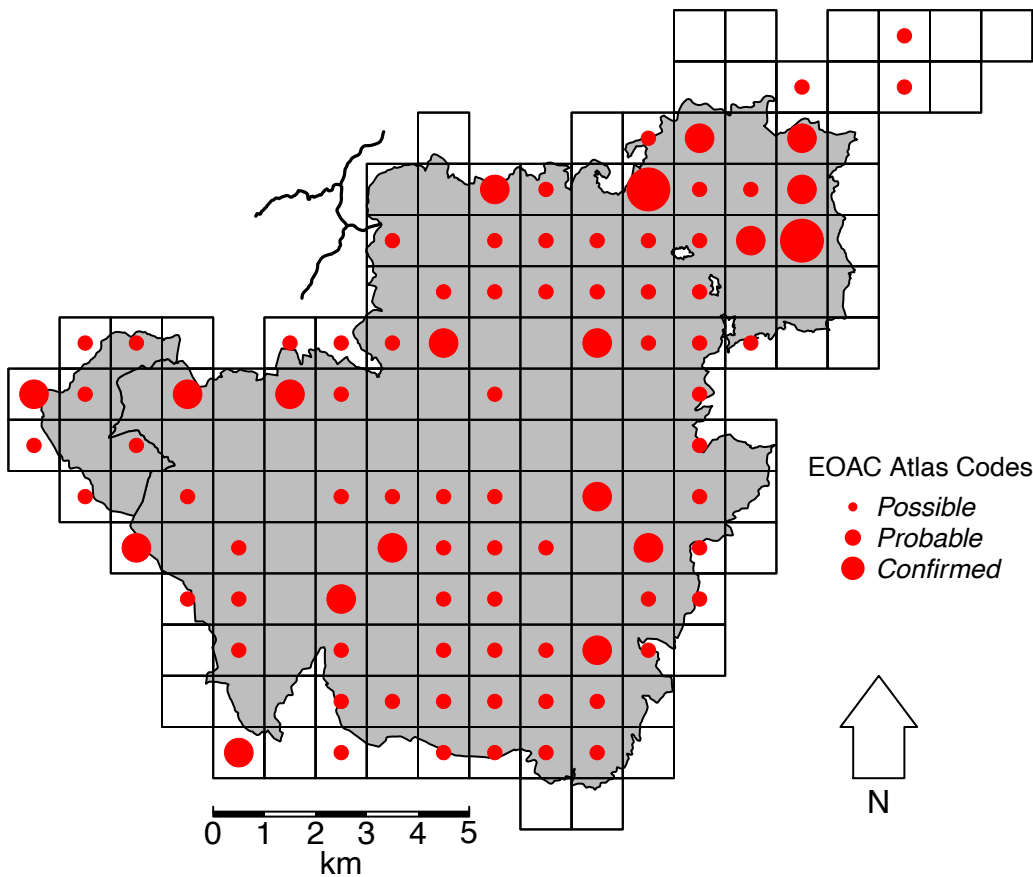

# C brach

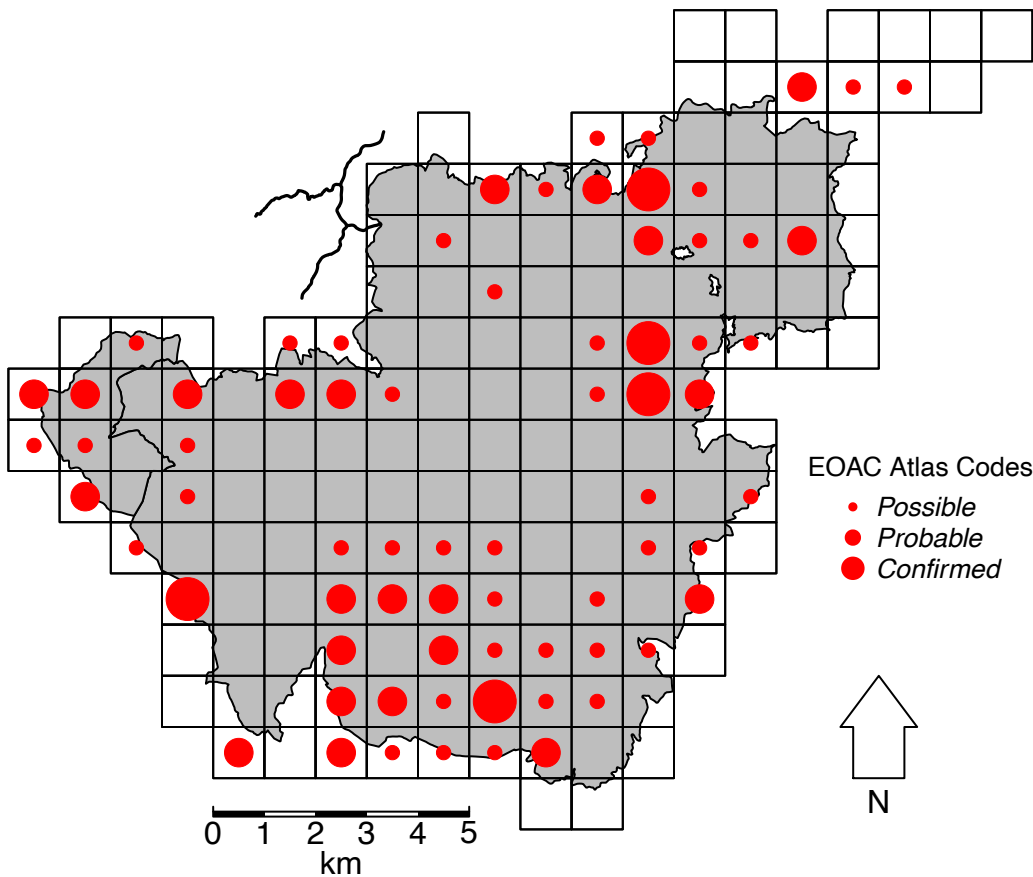

# C cann

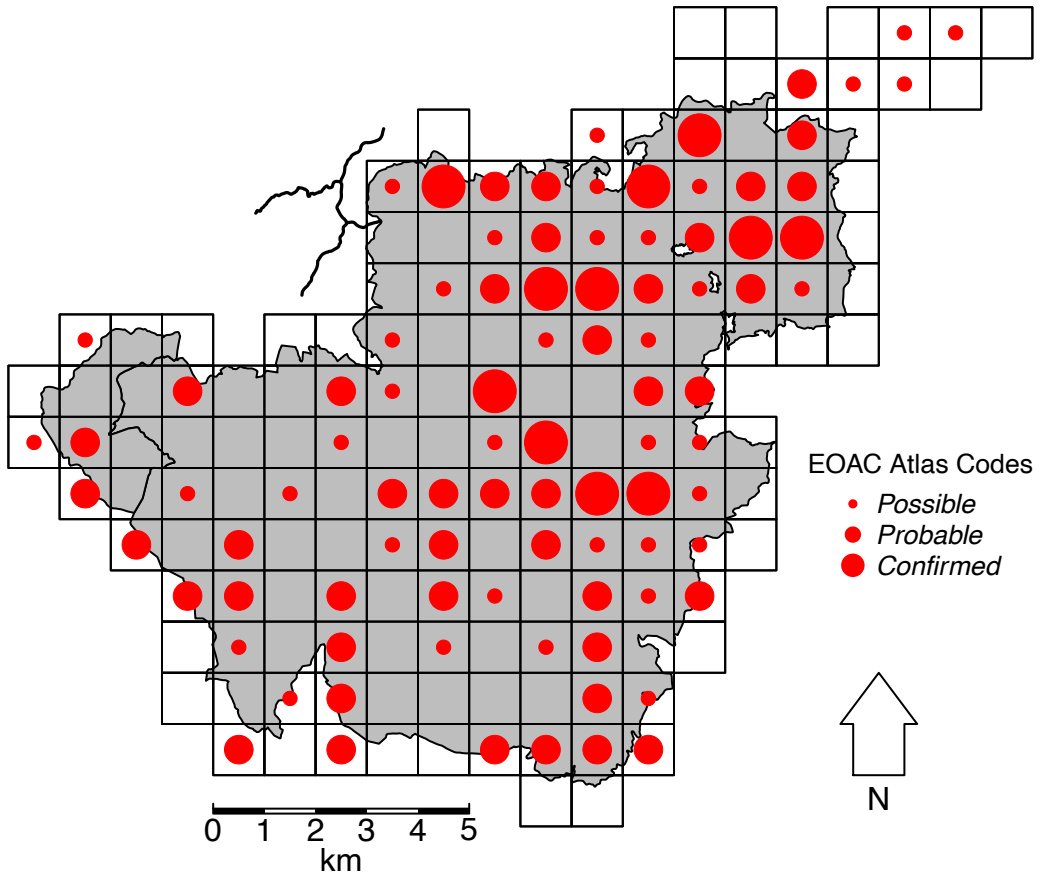

# C canor

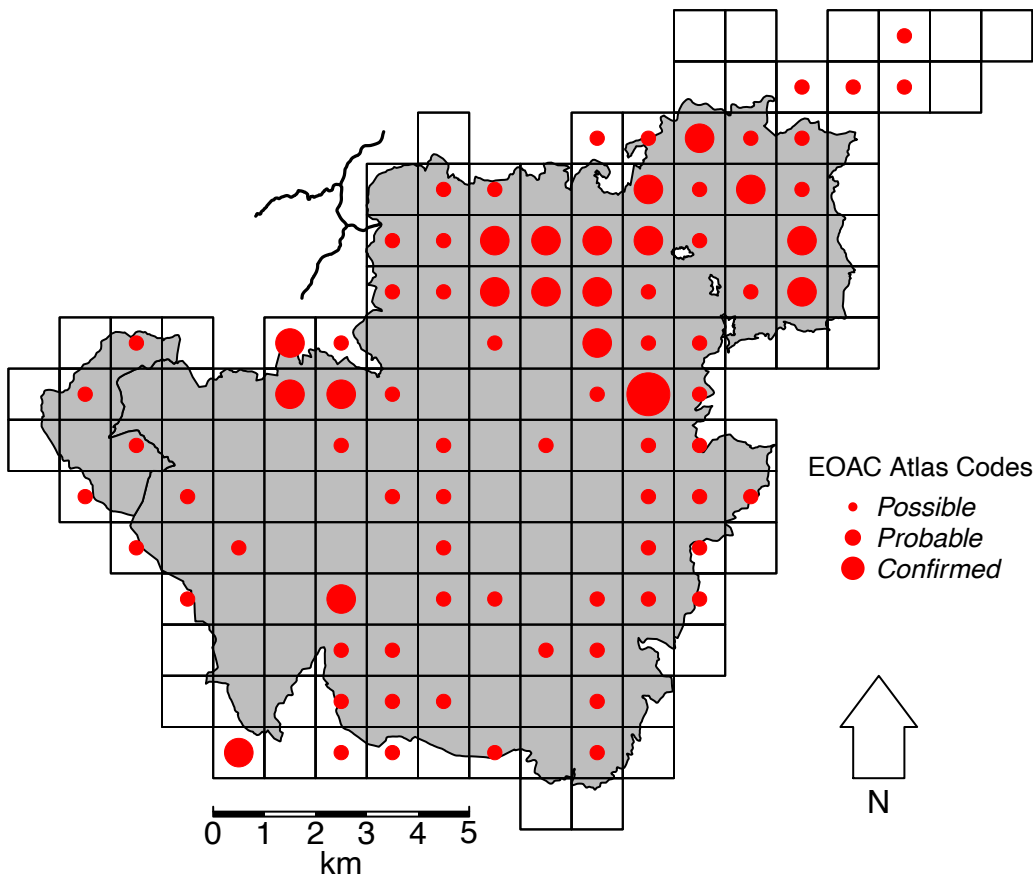

# C card

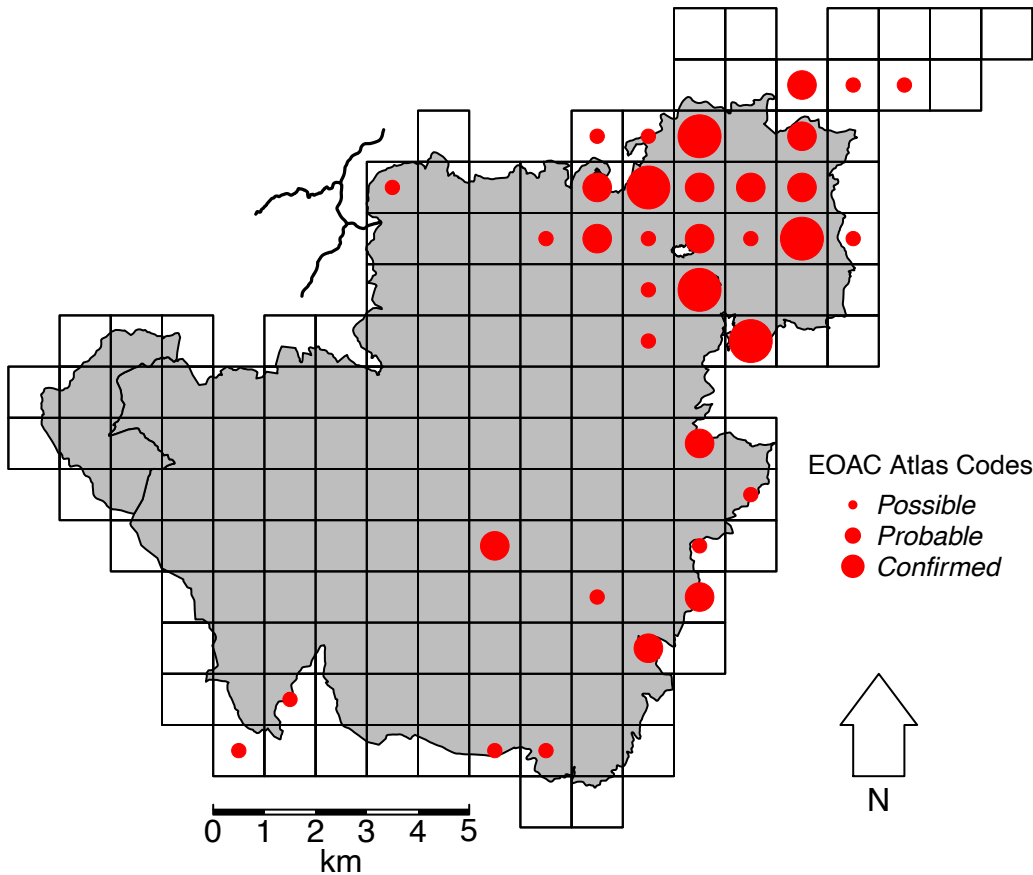

# C cetti

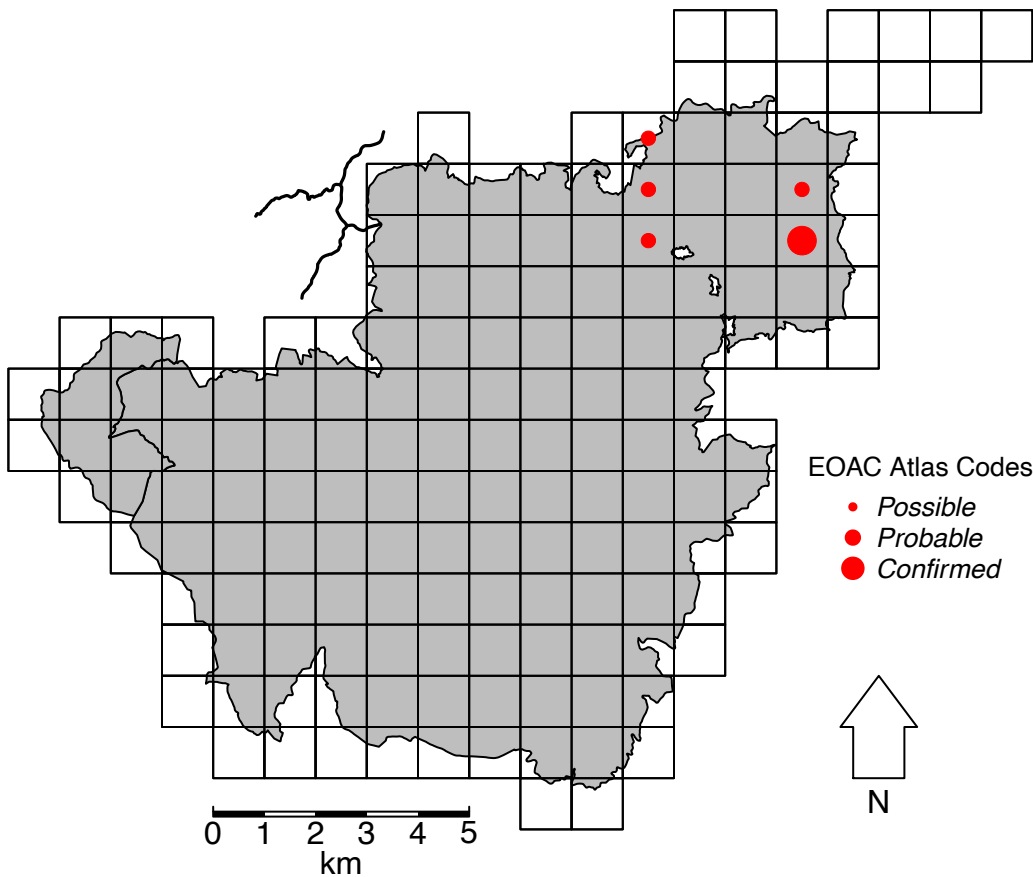

# C chlor

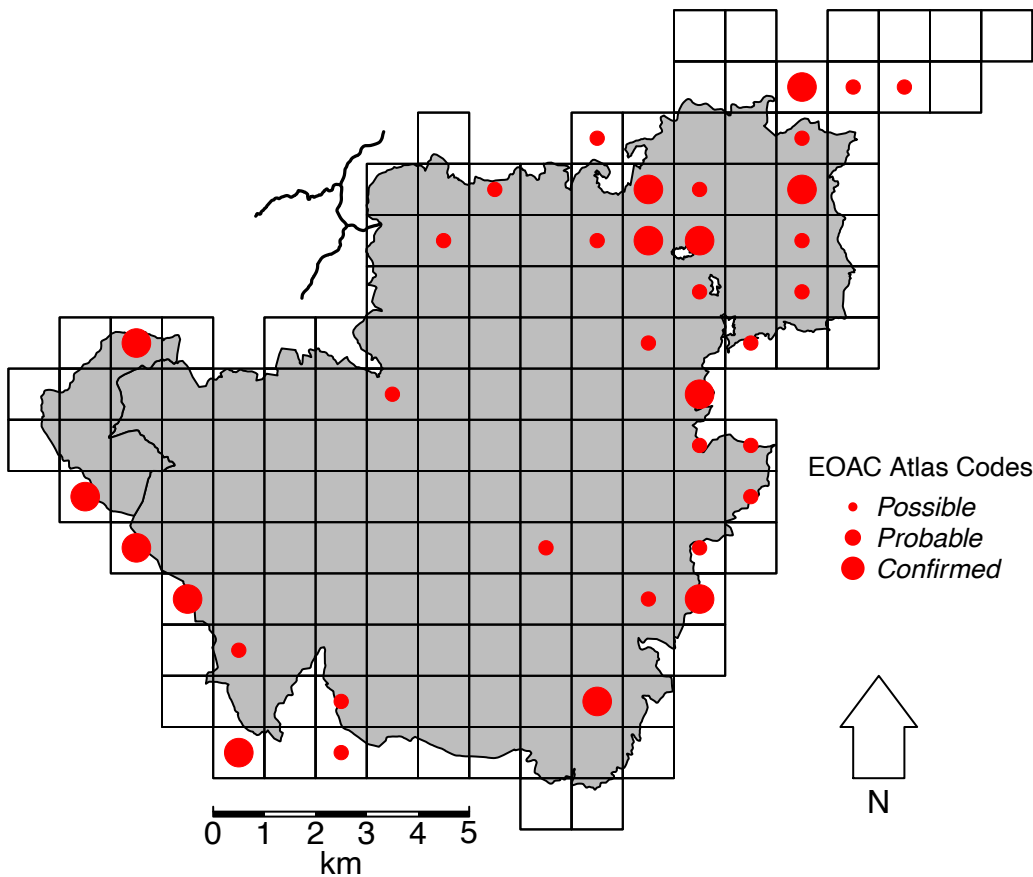

# C ciconia

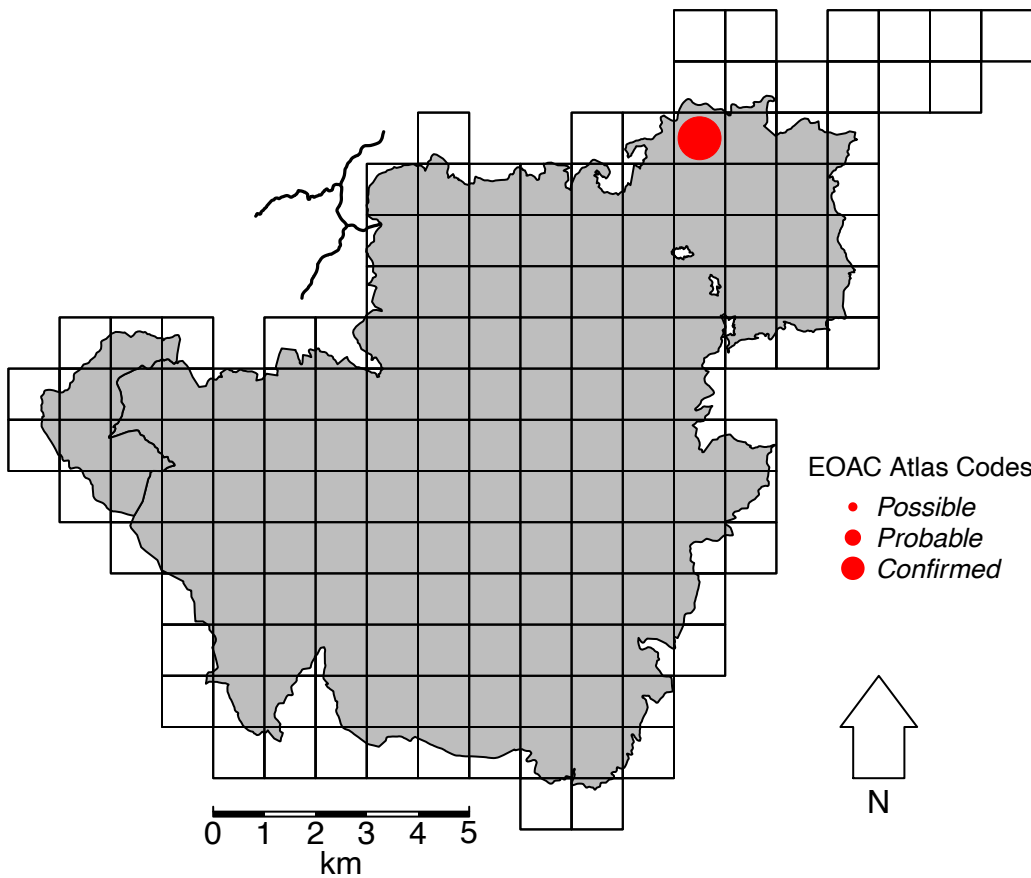

# C cinclus

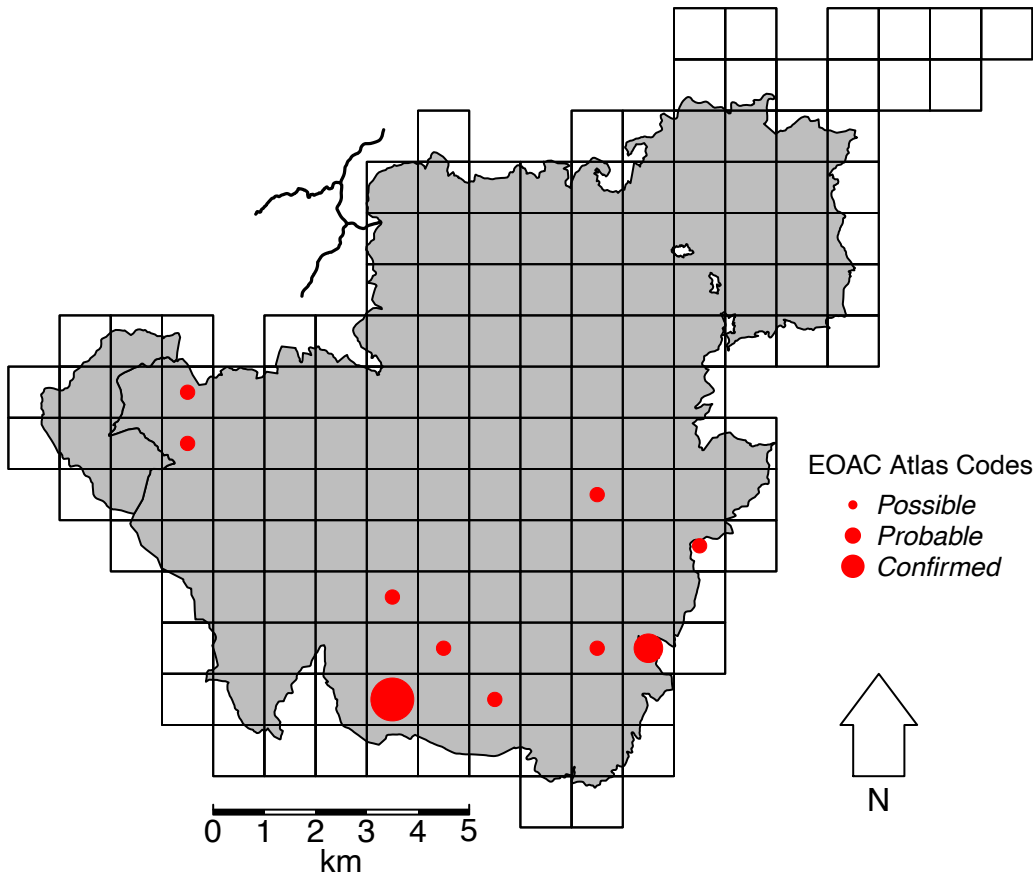

# C corax

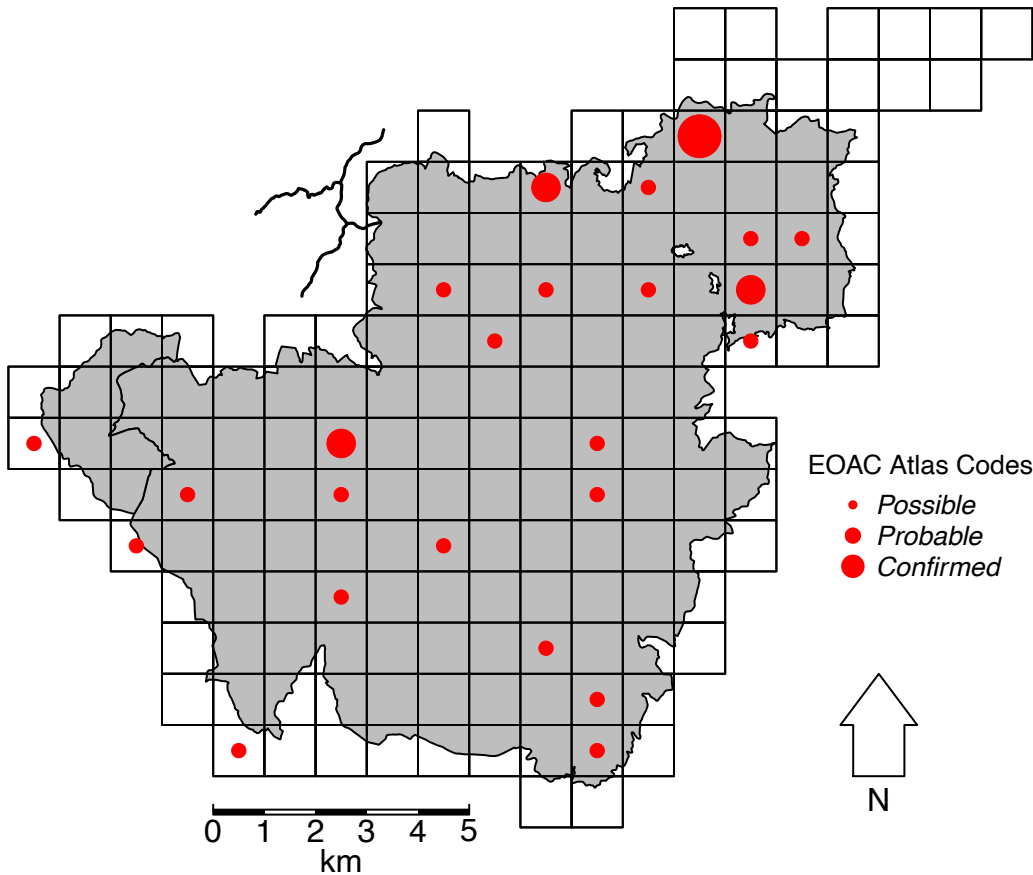

# C corone

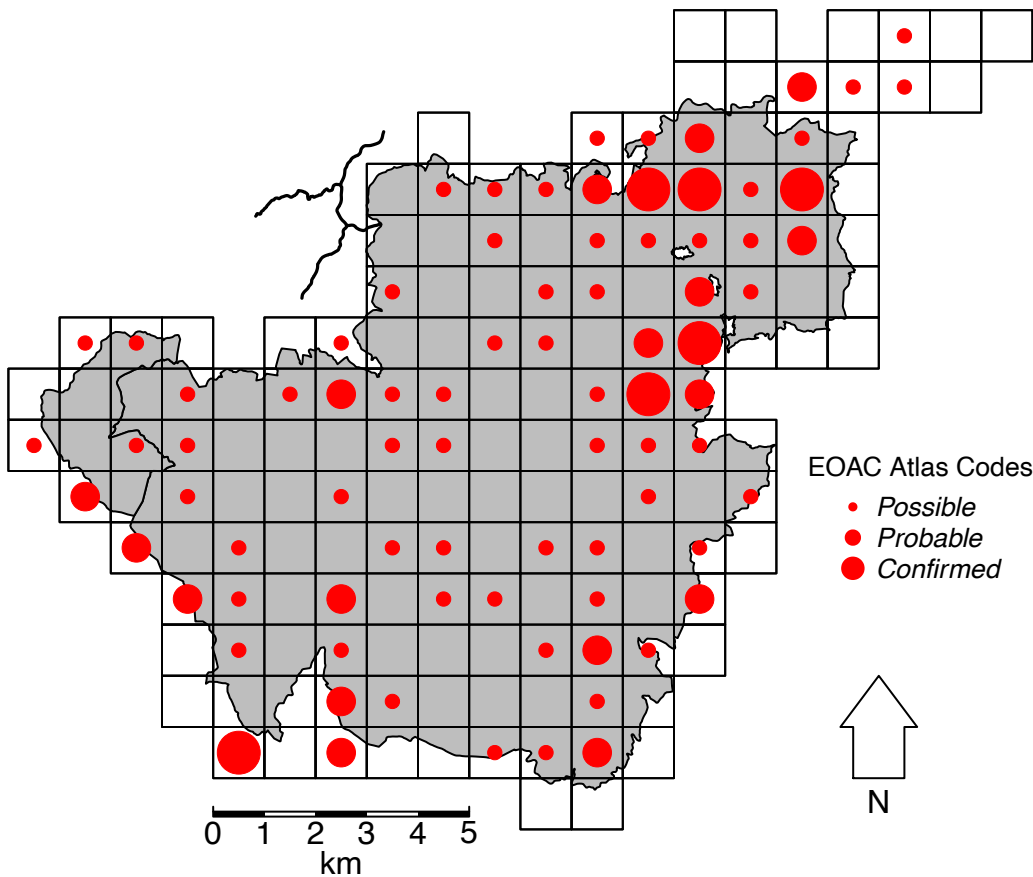

# C europ

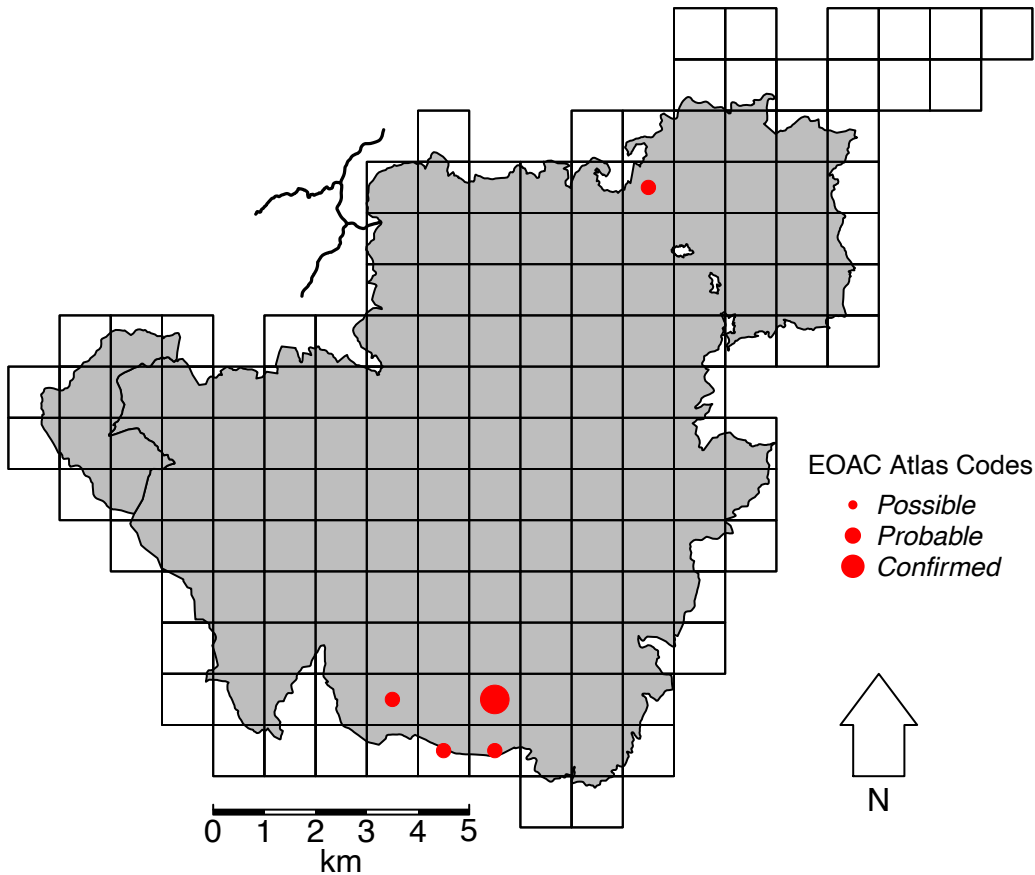

# C gallicus

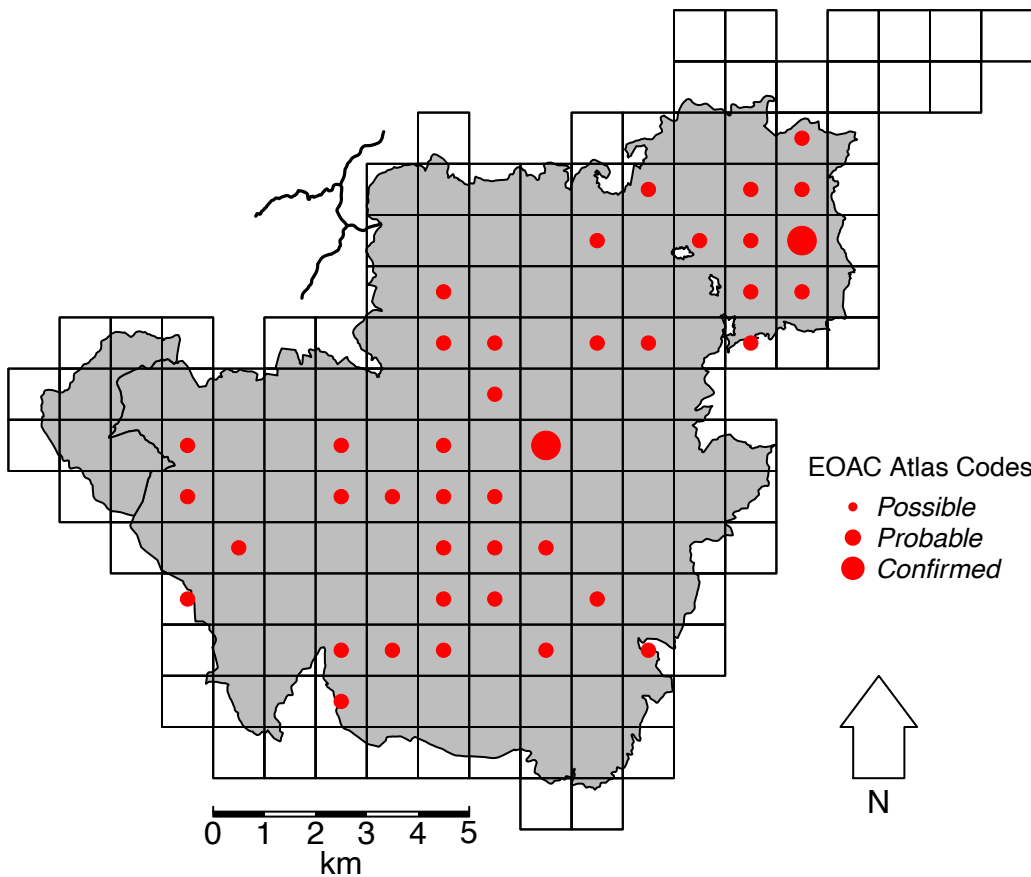

# C oenas

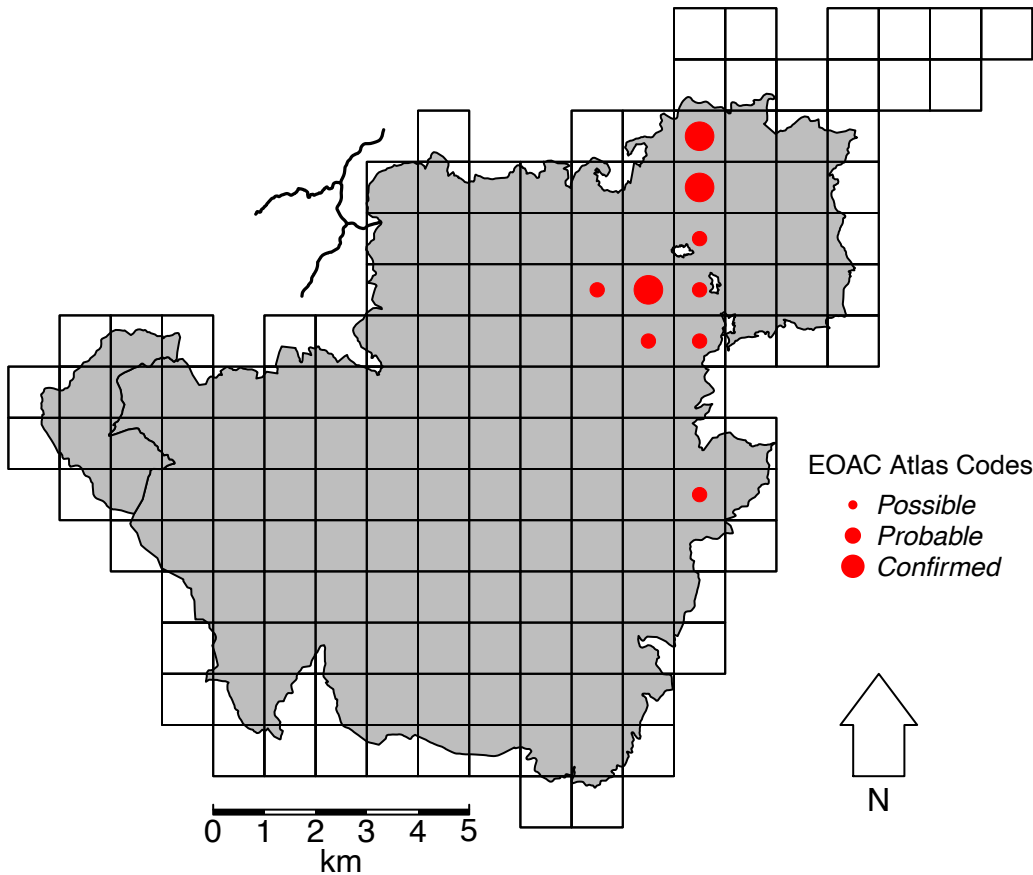

# C palum

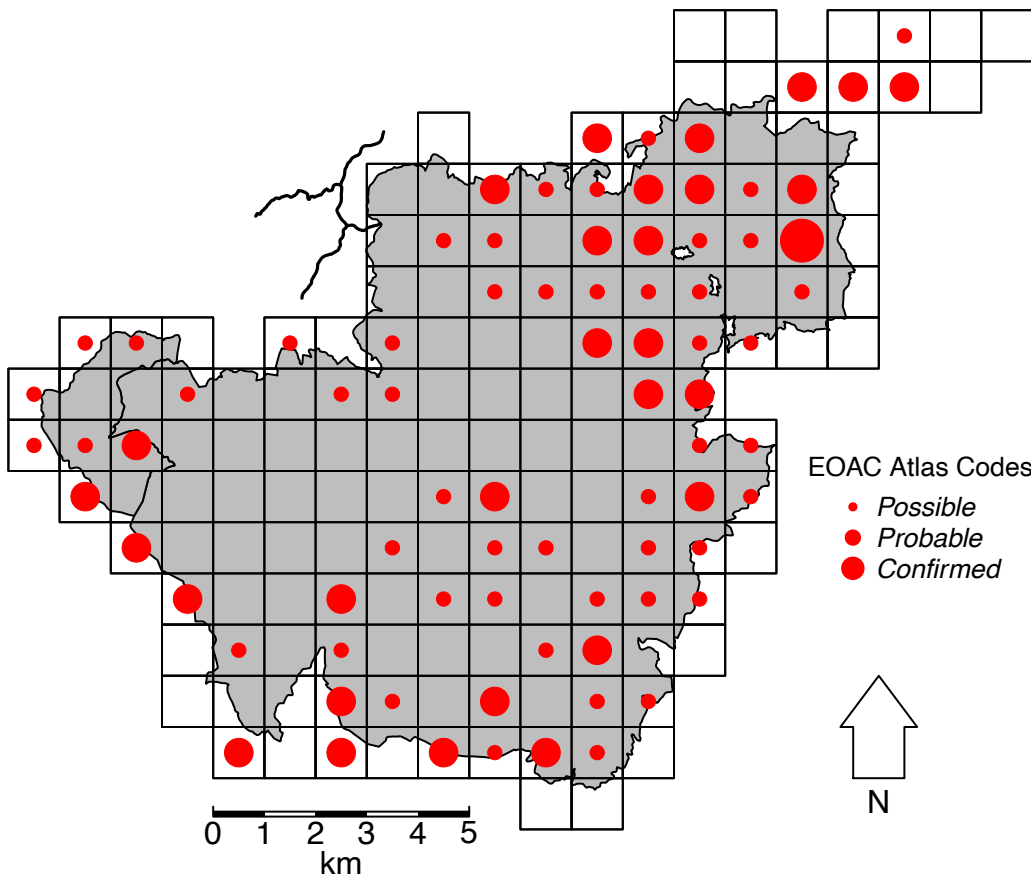

# C spin

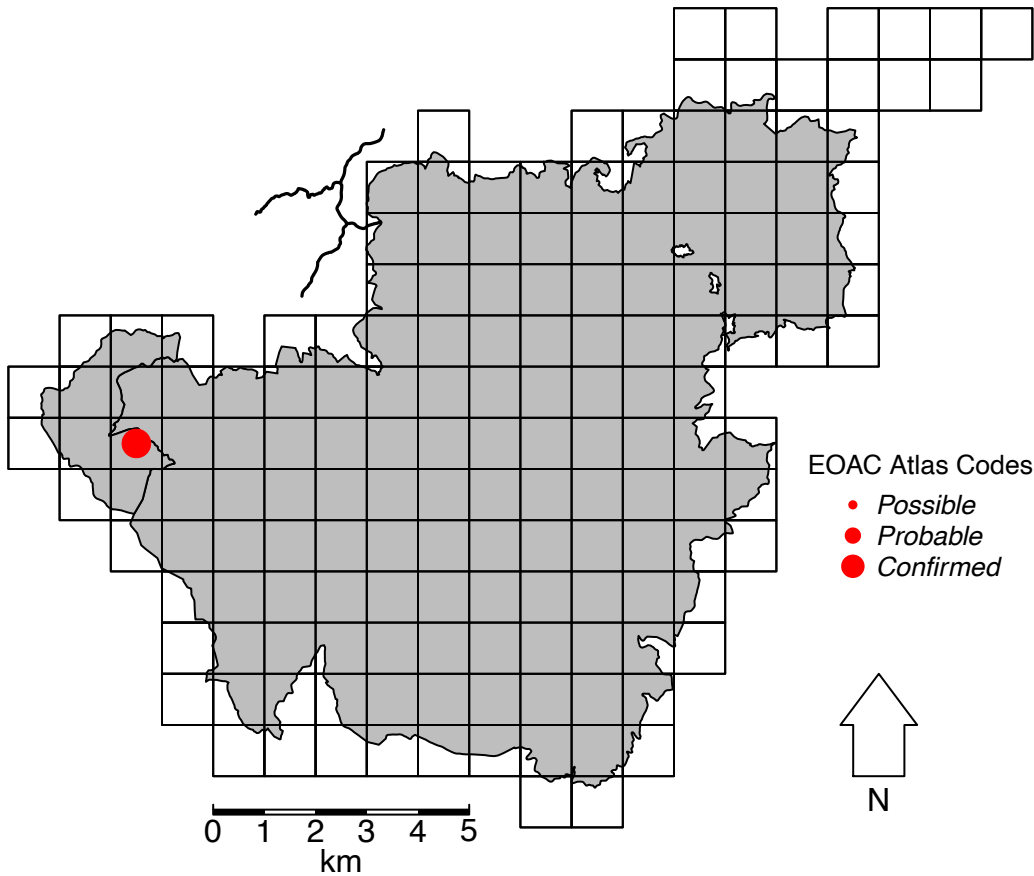

# Circ cyan

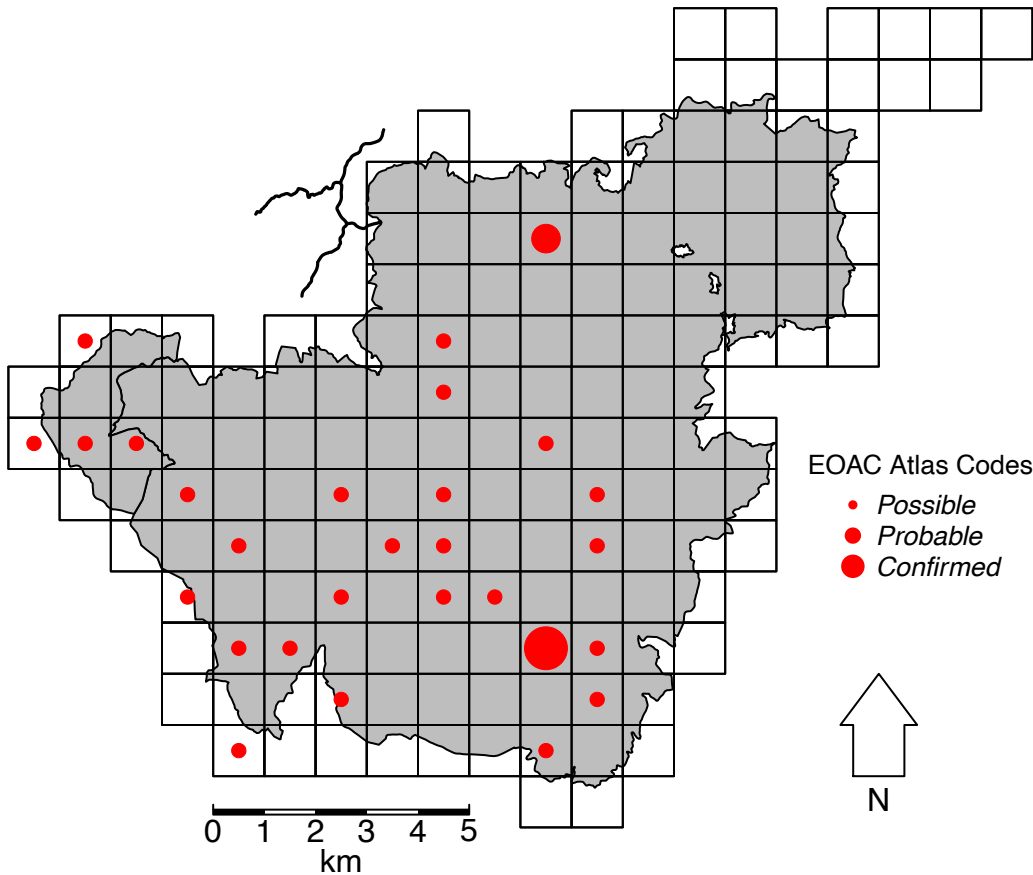

# Circ pyg

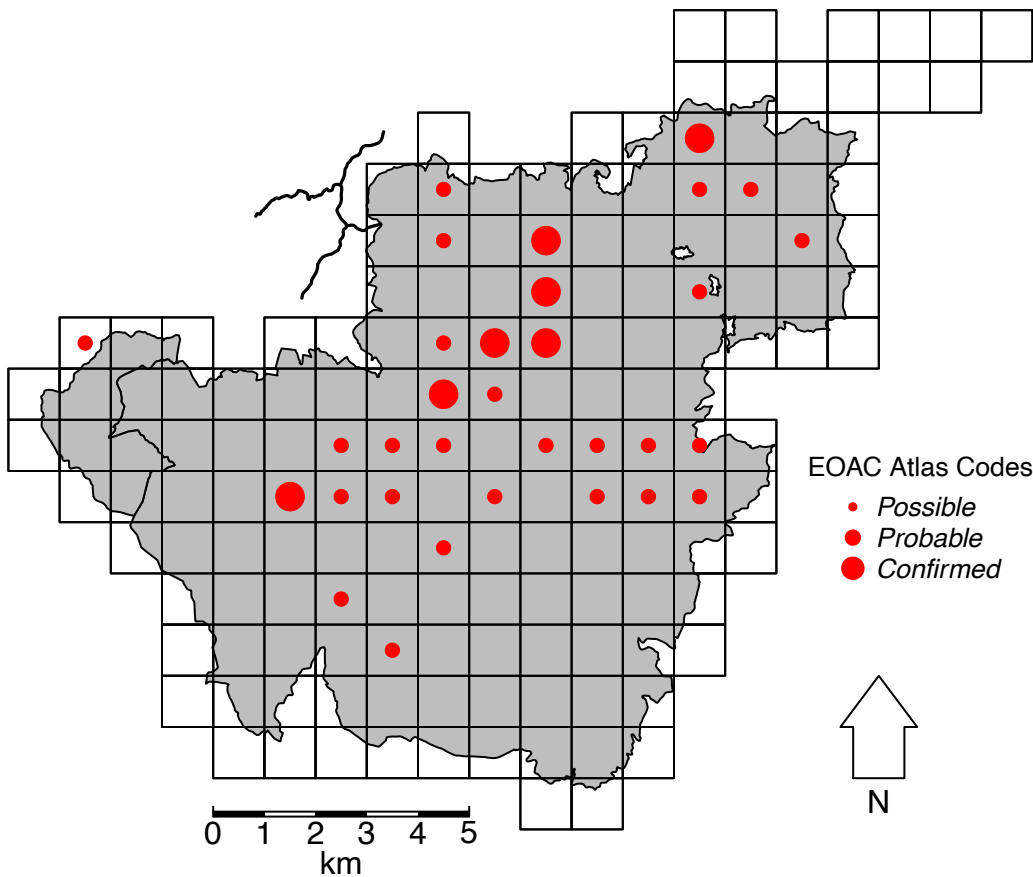

# Cot cot

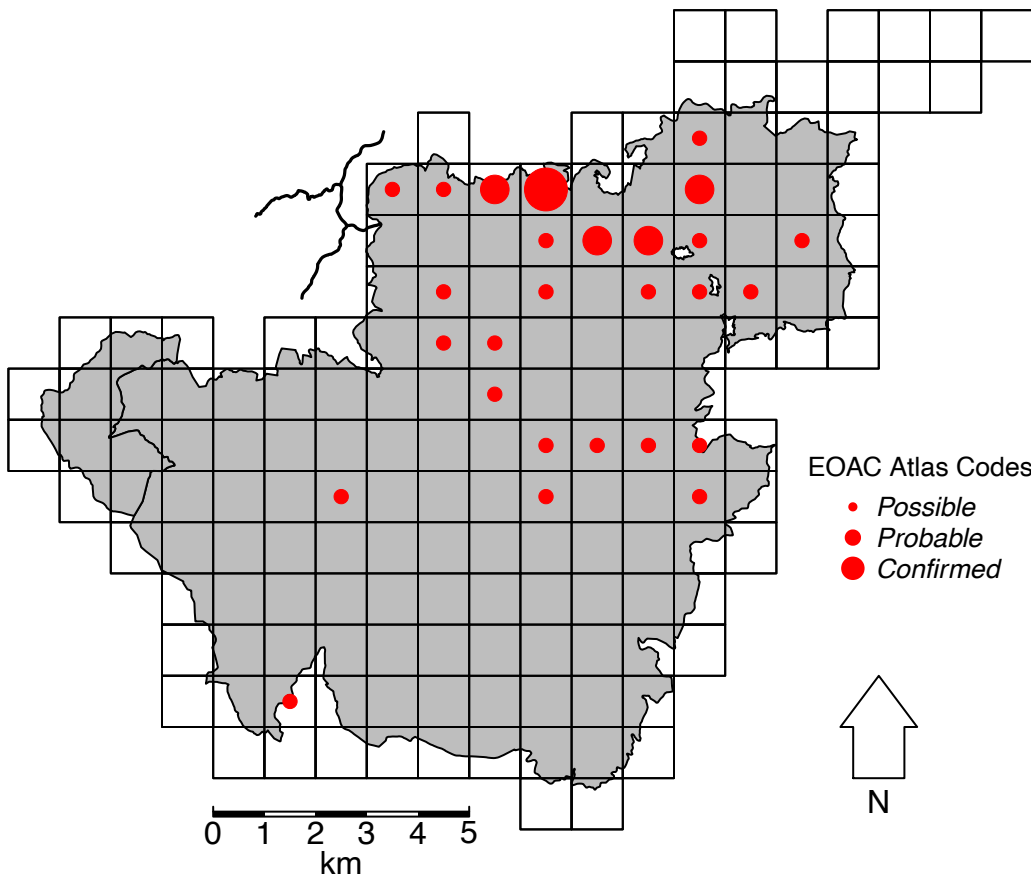

# D major

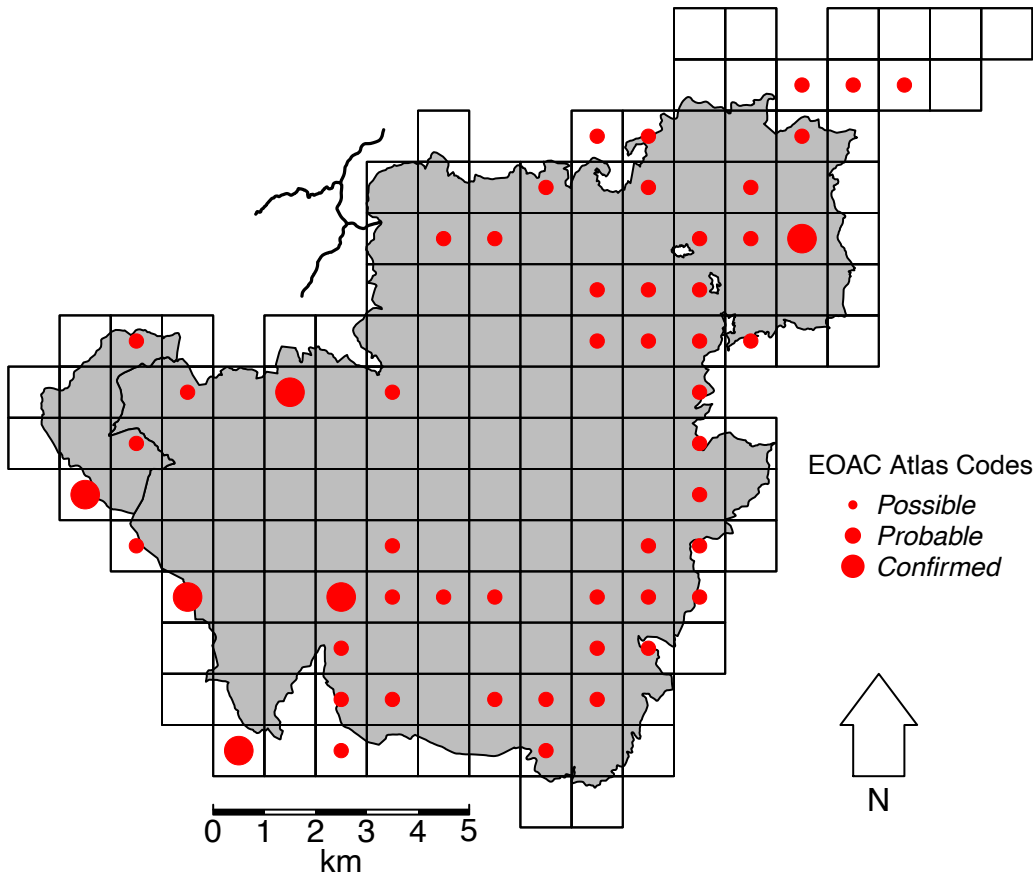

## D minor

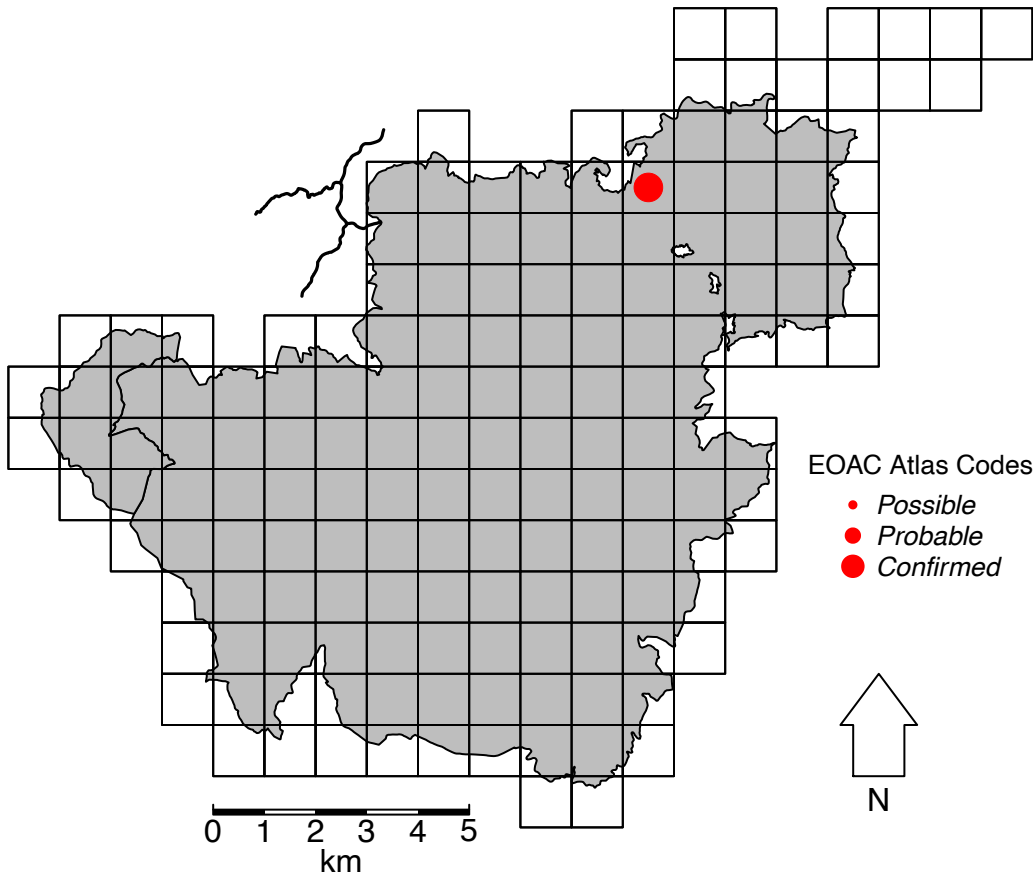

# D urbica

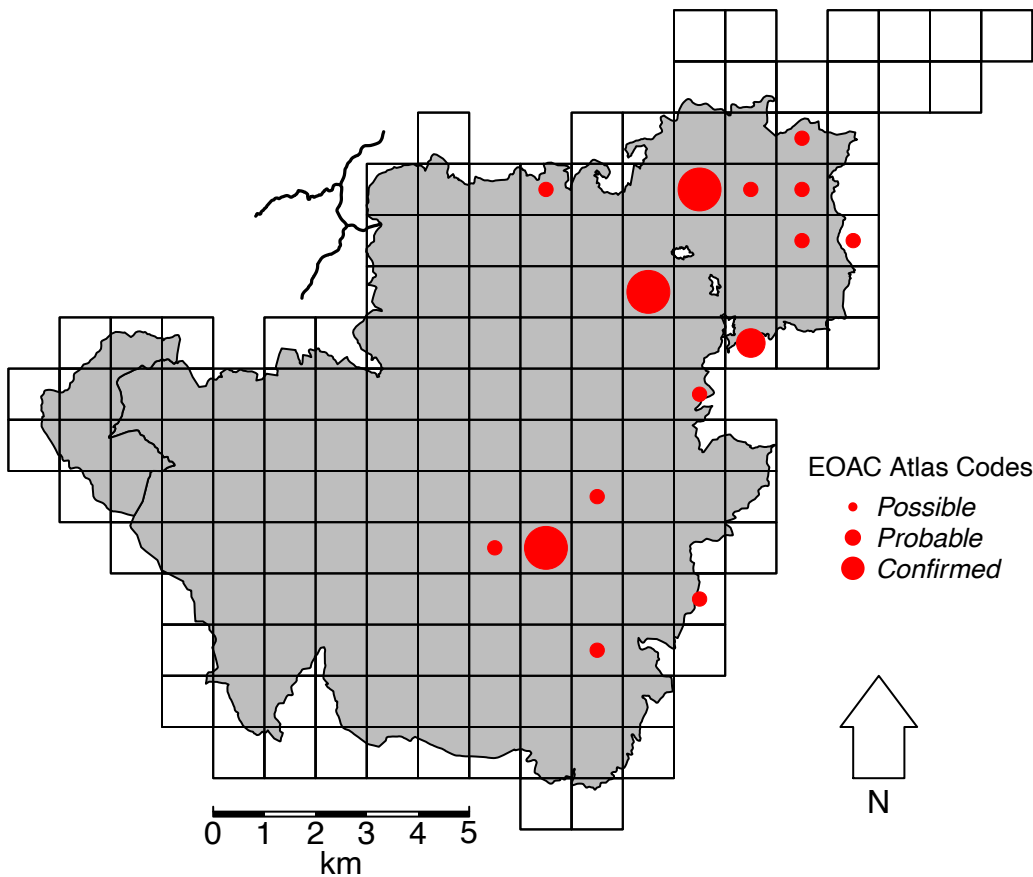

# E cia

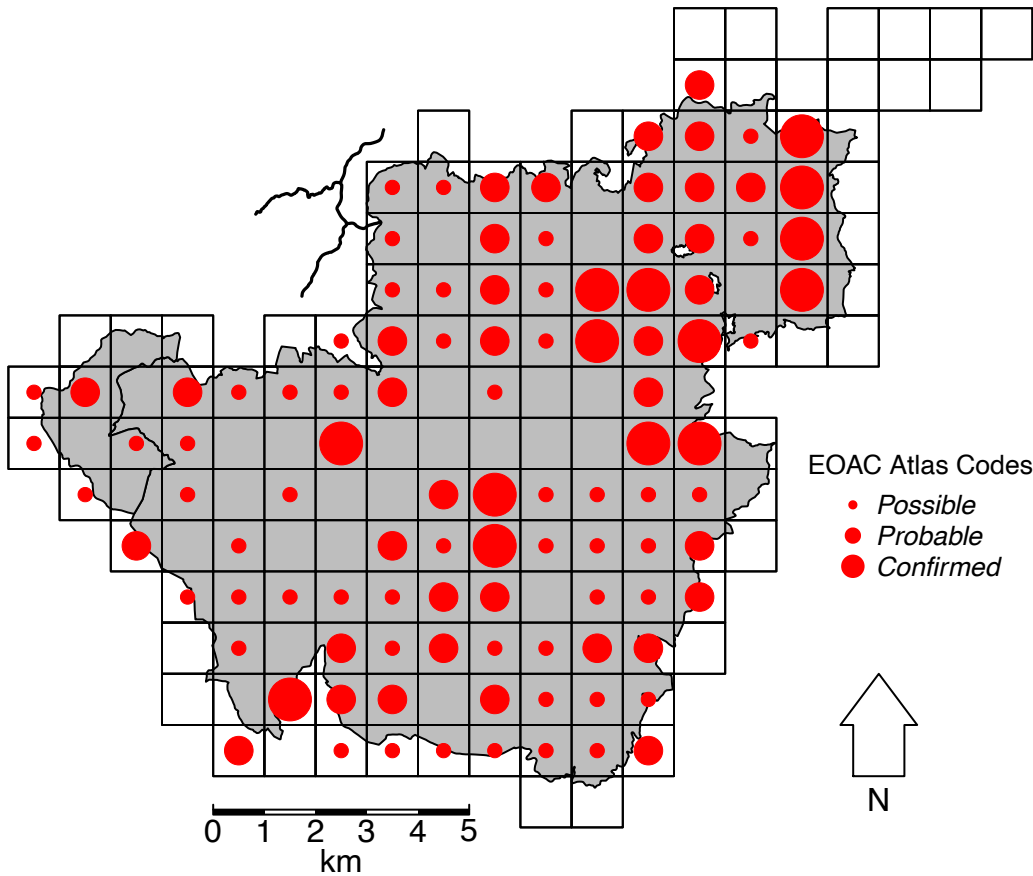

# E cirrus

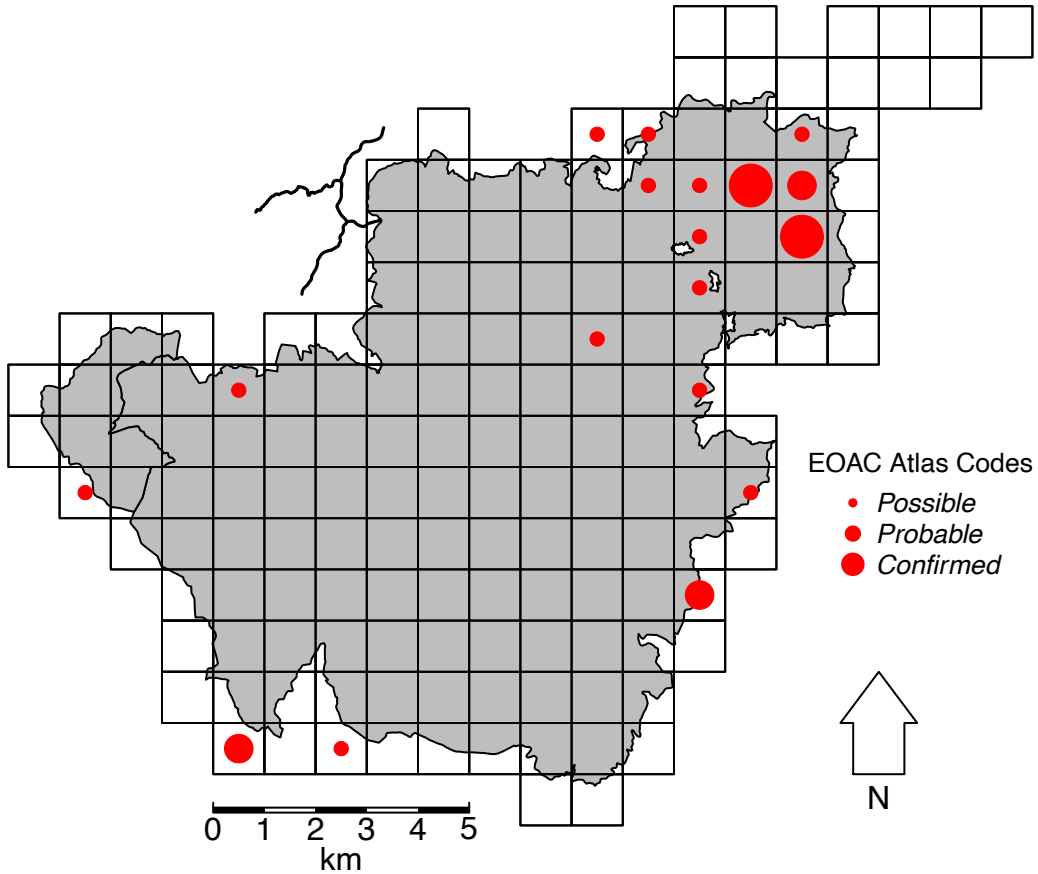

## E citrin

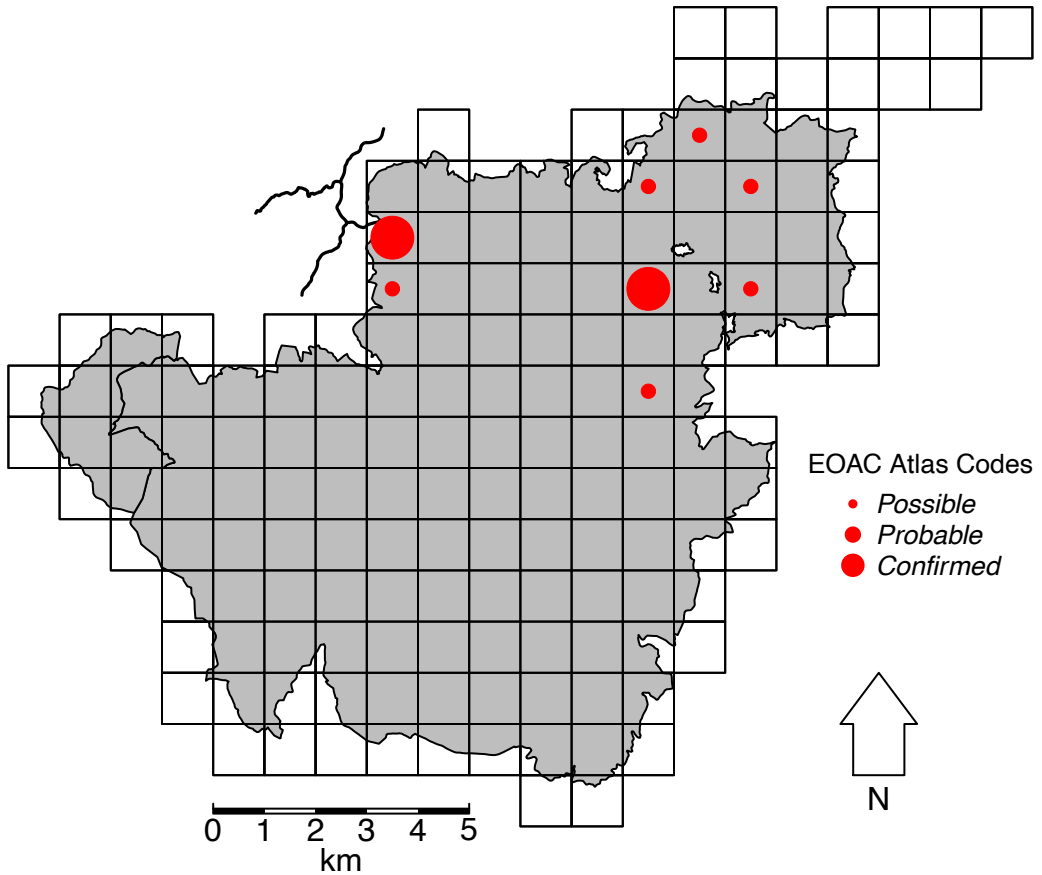

# E hort

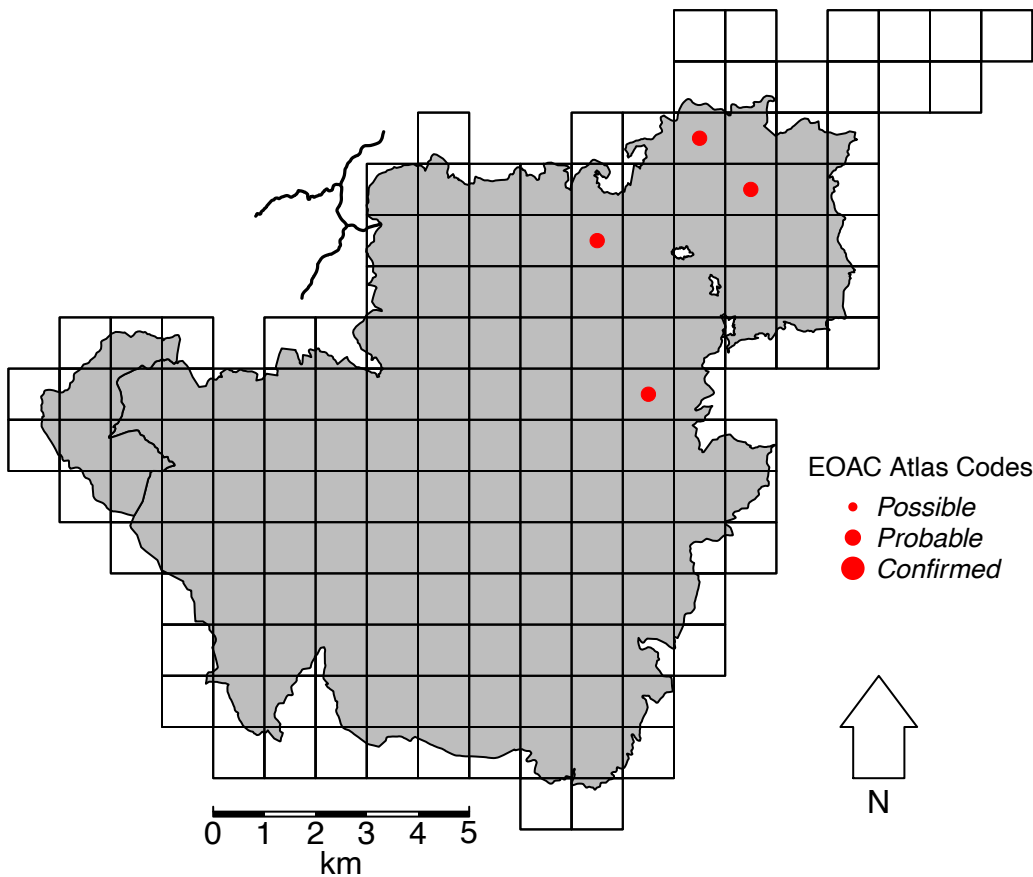

# E rube

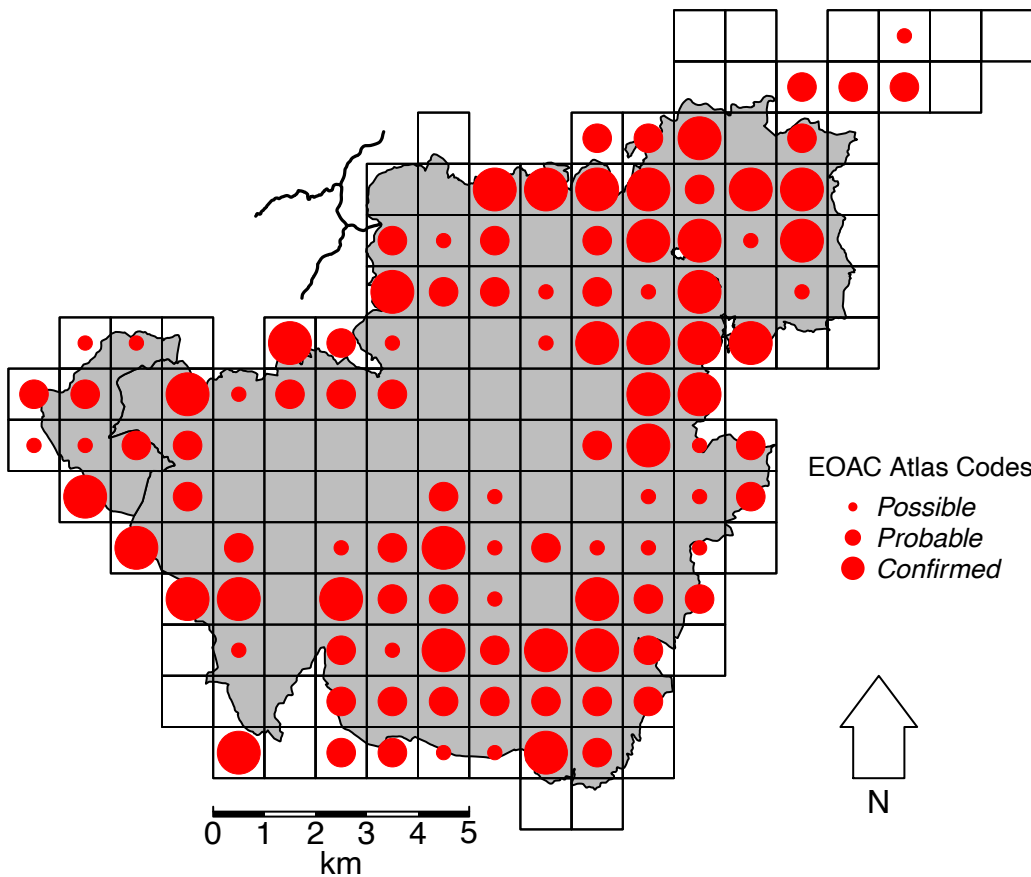

# F coel

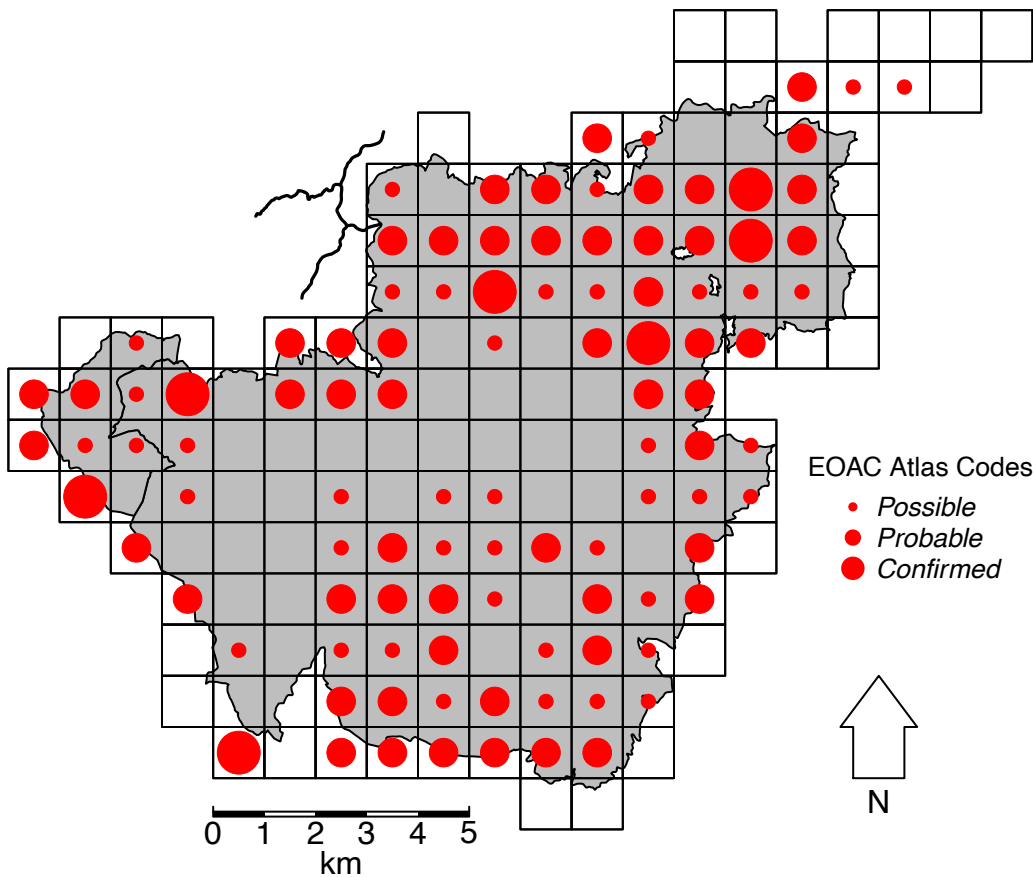

F per

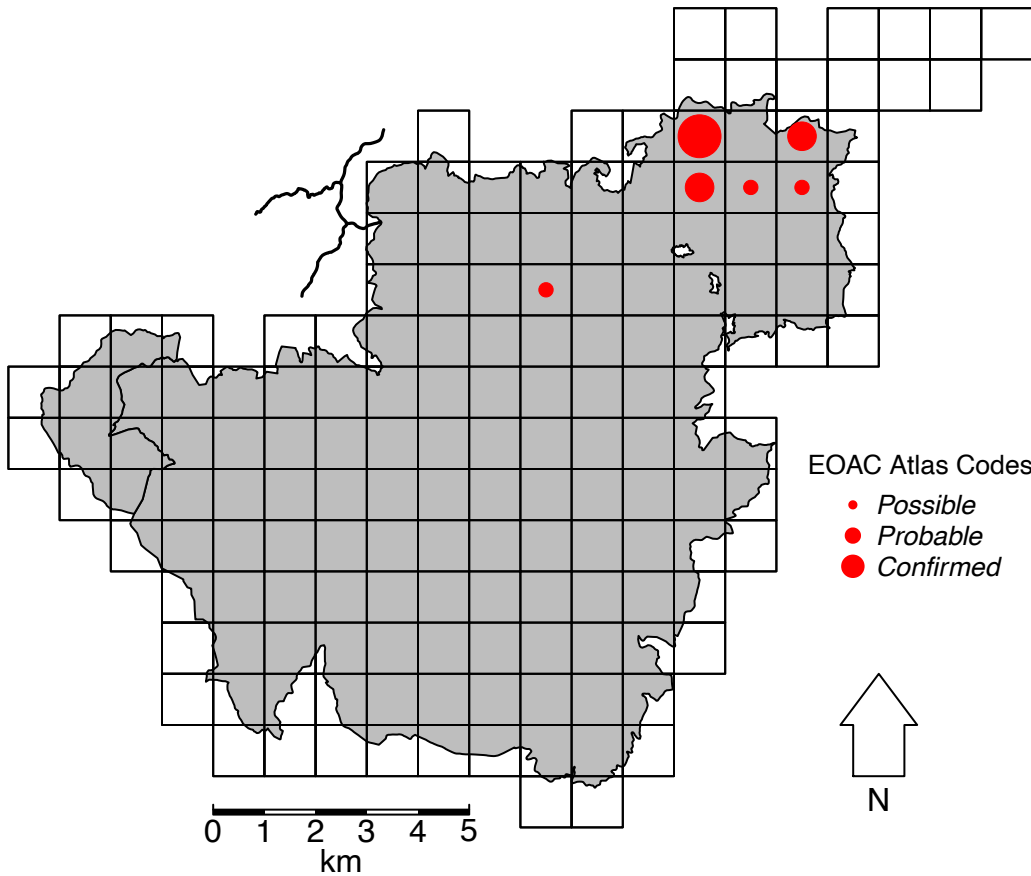

**F sub**

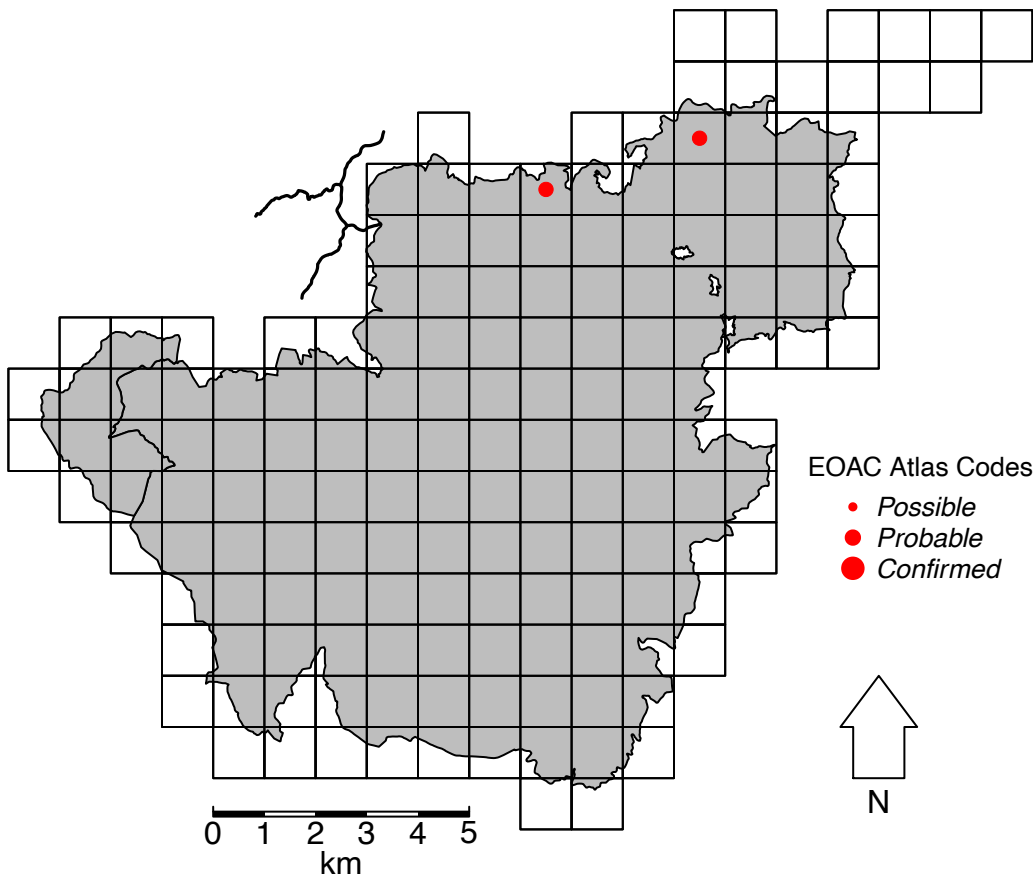

**F tin**

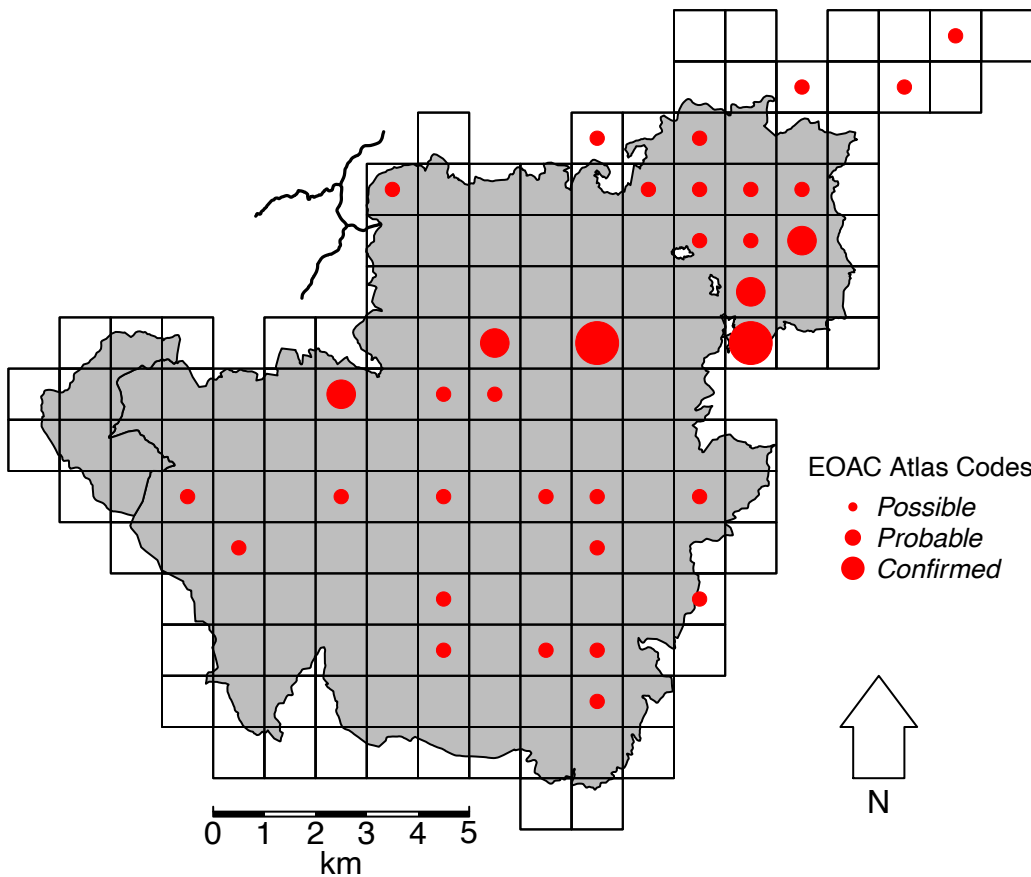

# G gland

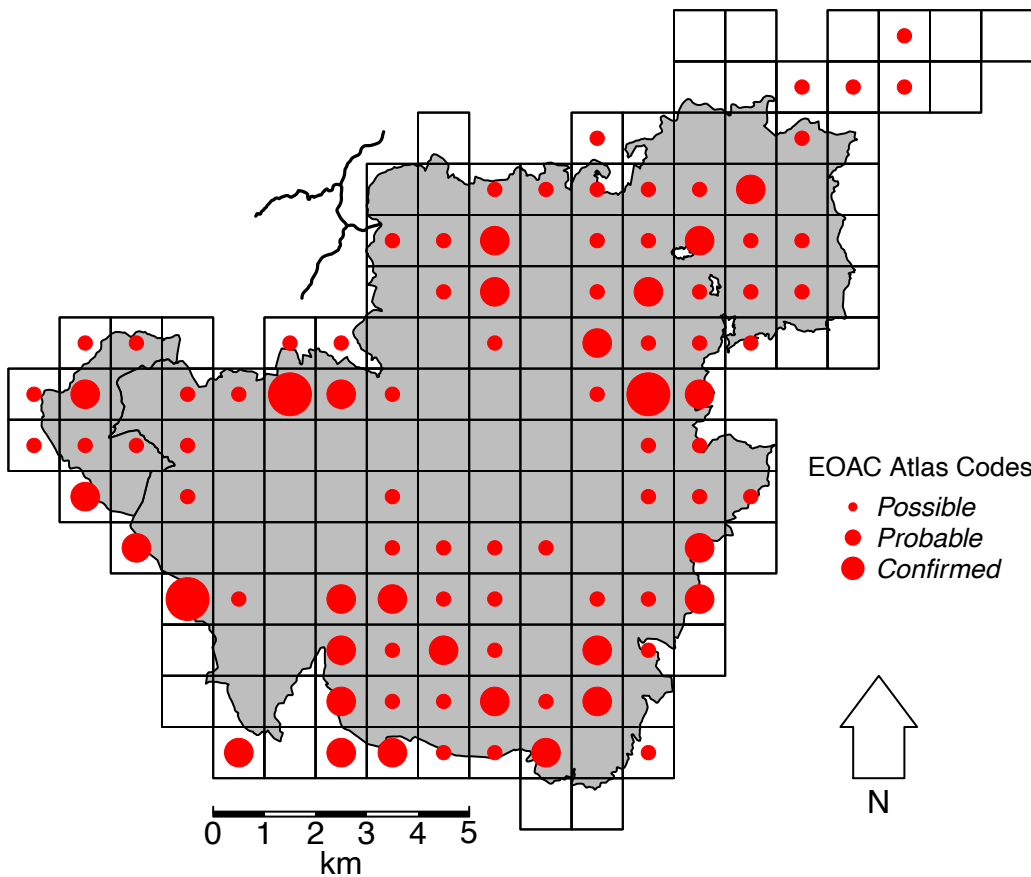

# H daur

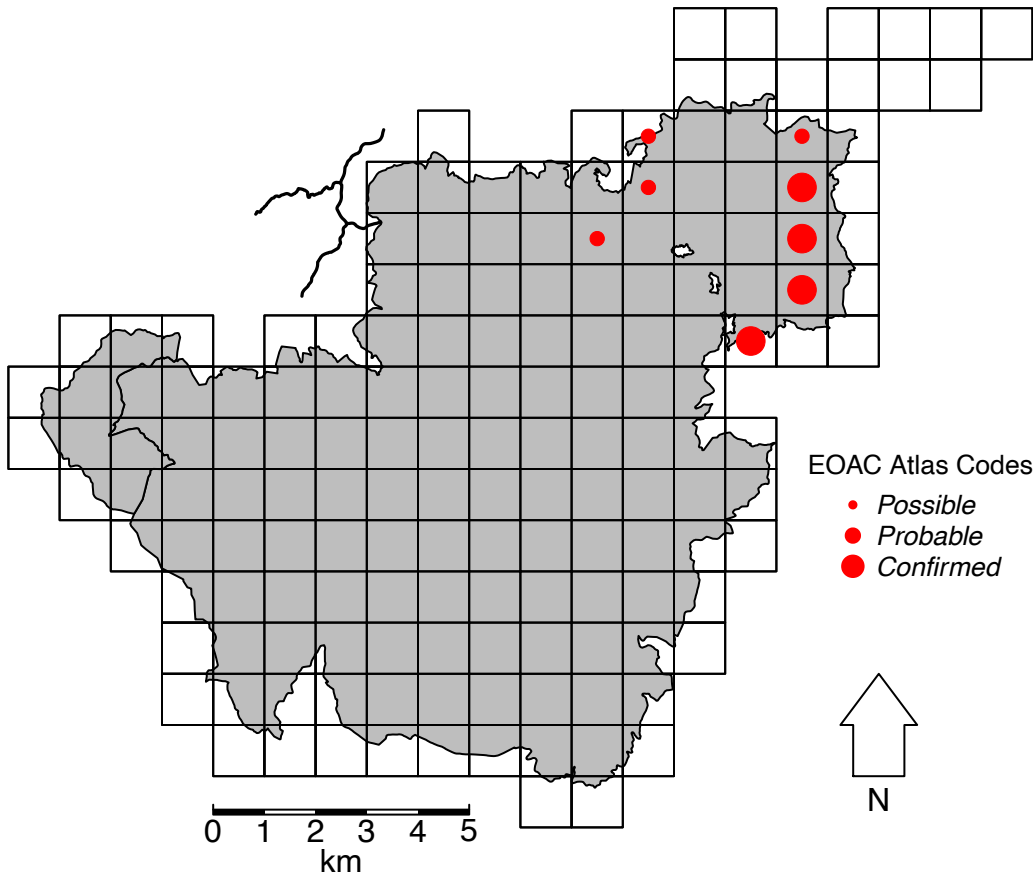

# H penn

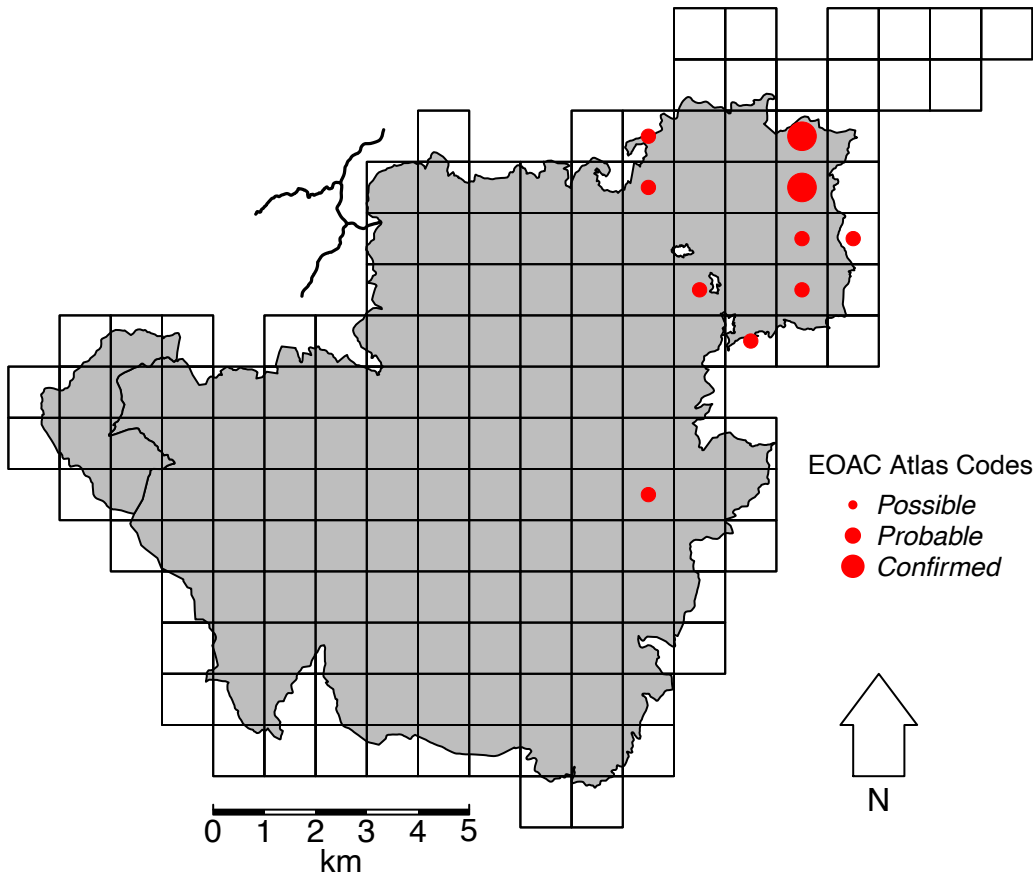

# H polyg

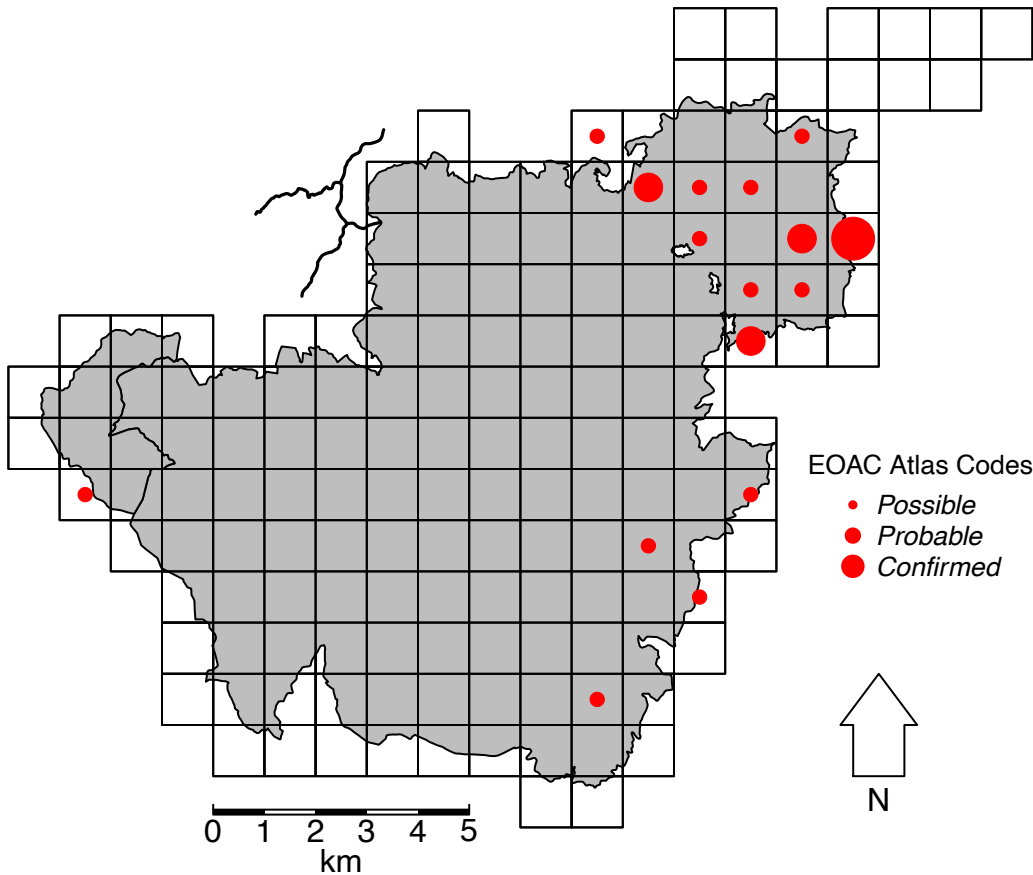

# H rust

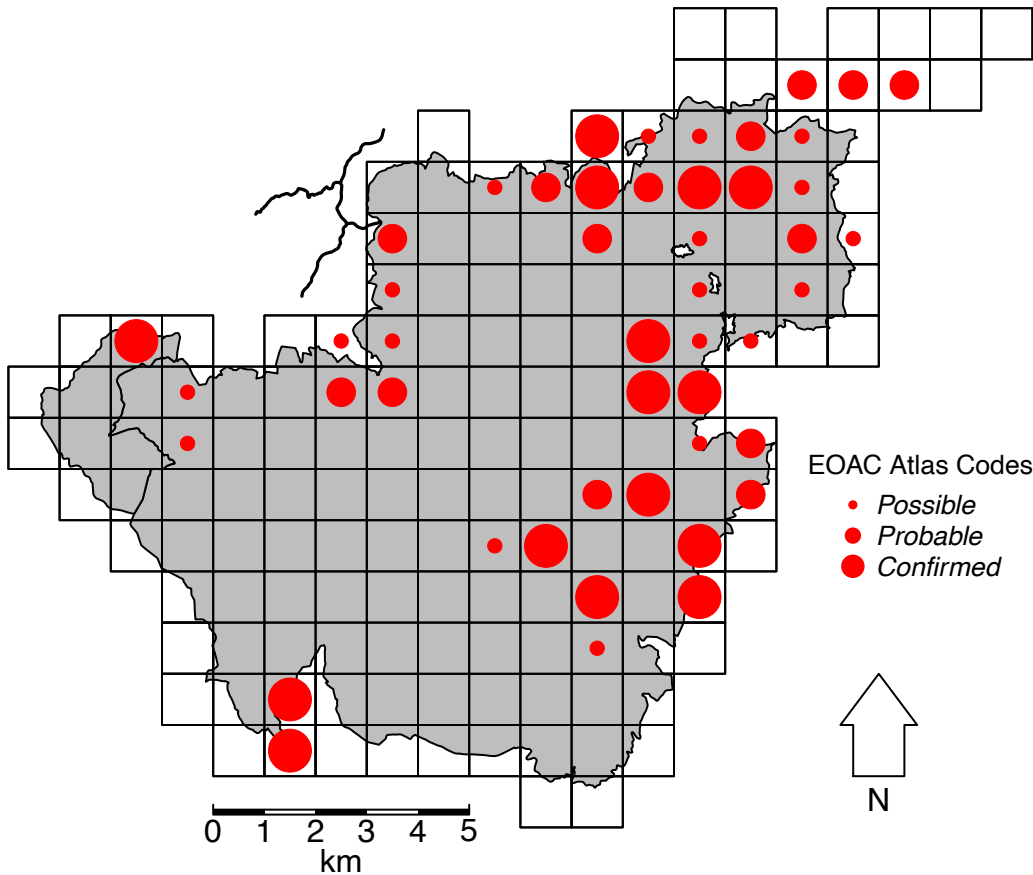

# Jynx tor

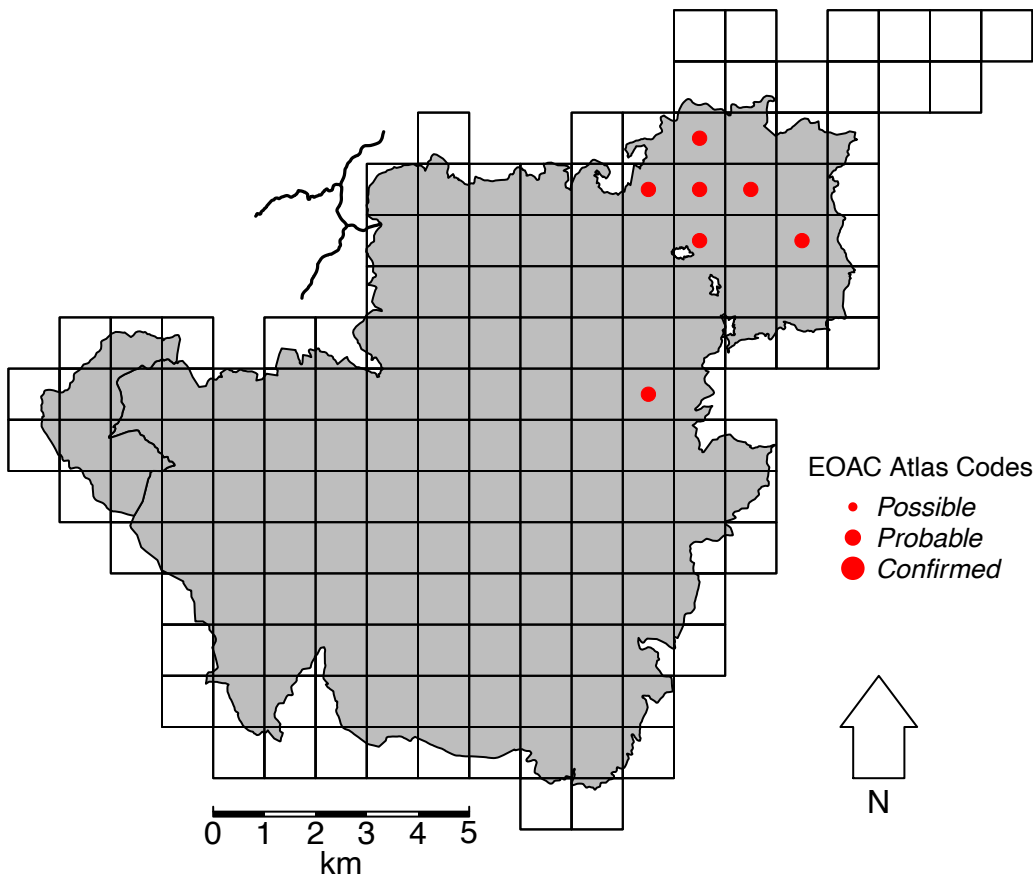

# L coll

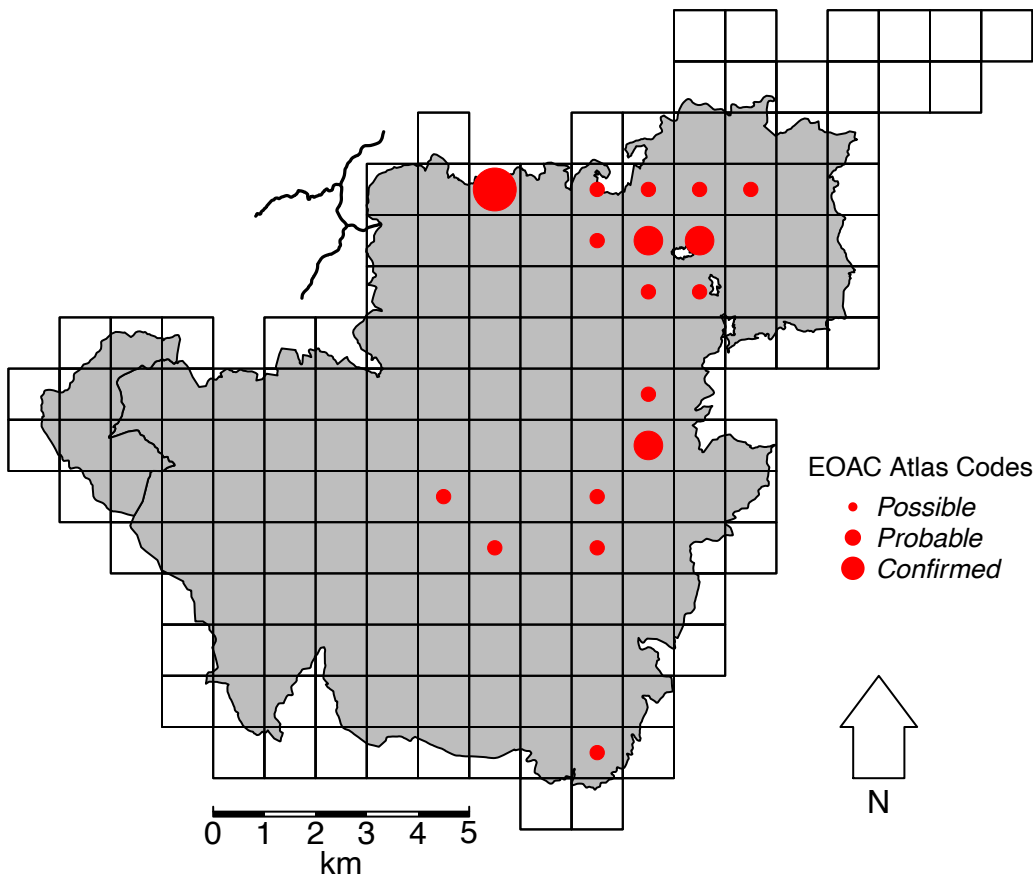

# L curvir

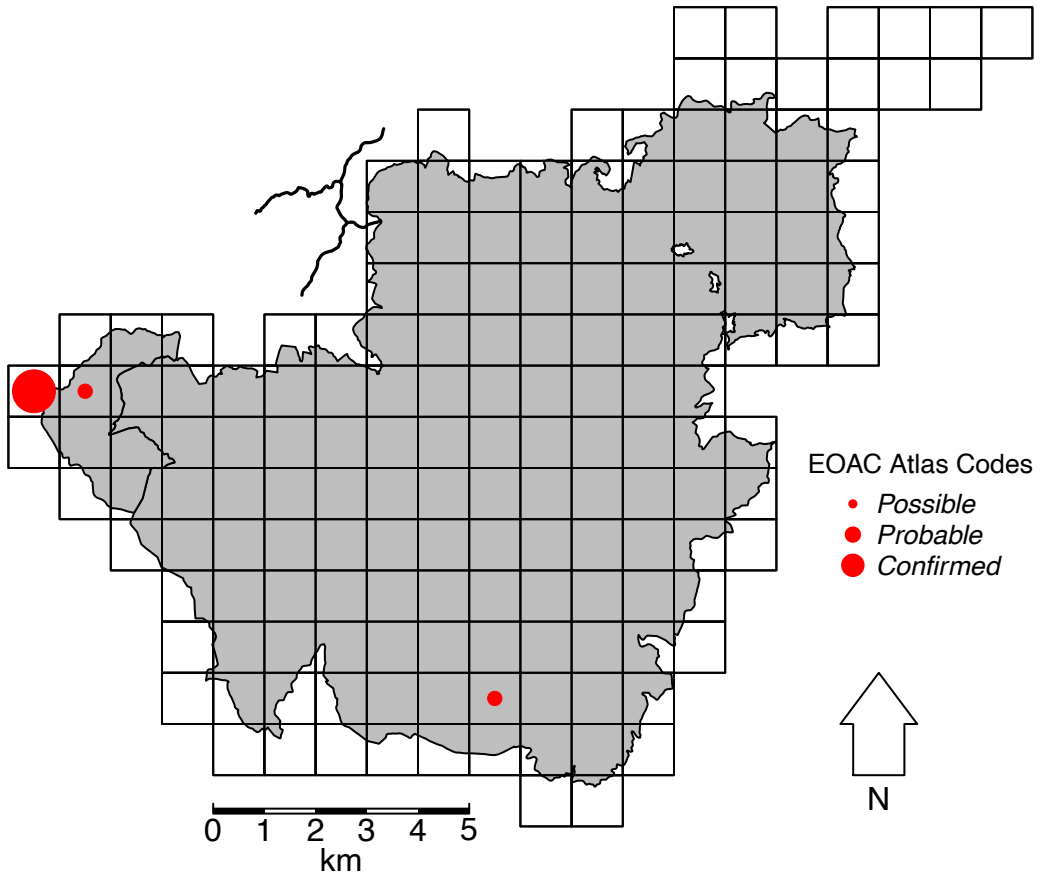

# L megar

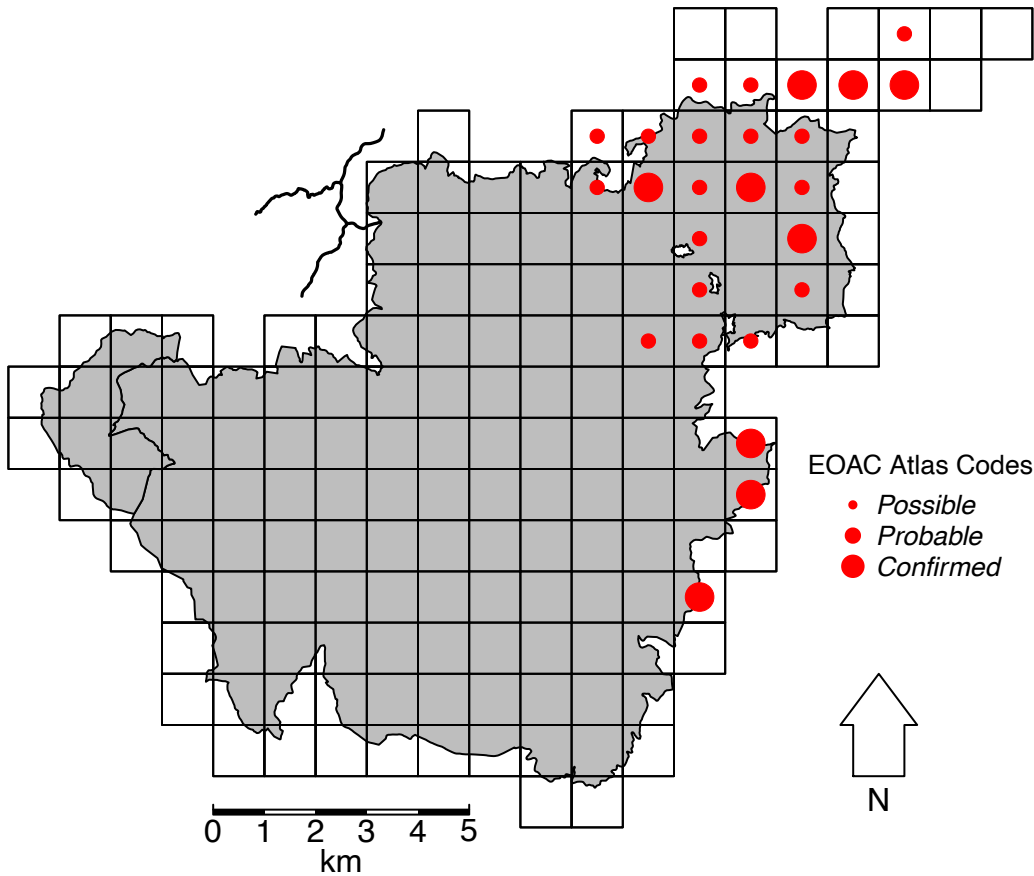

# L meridiona

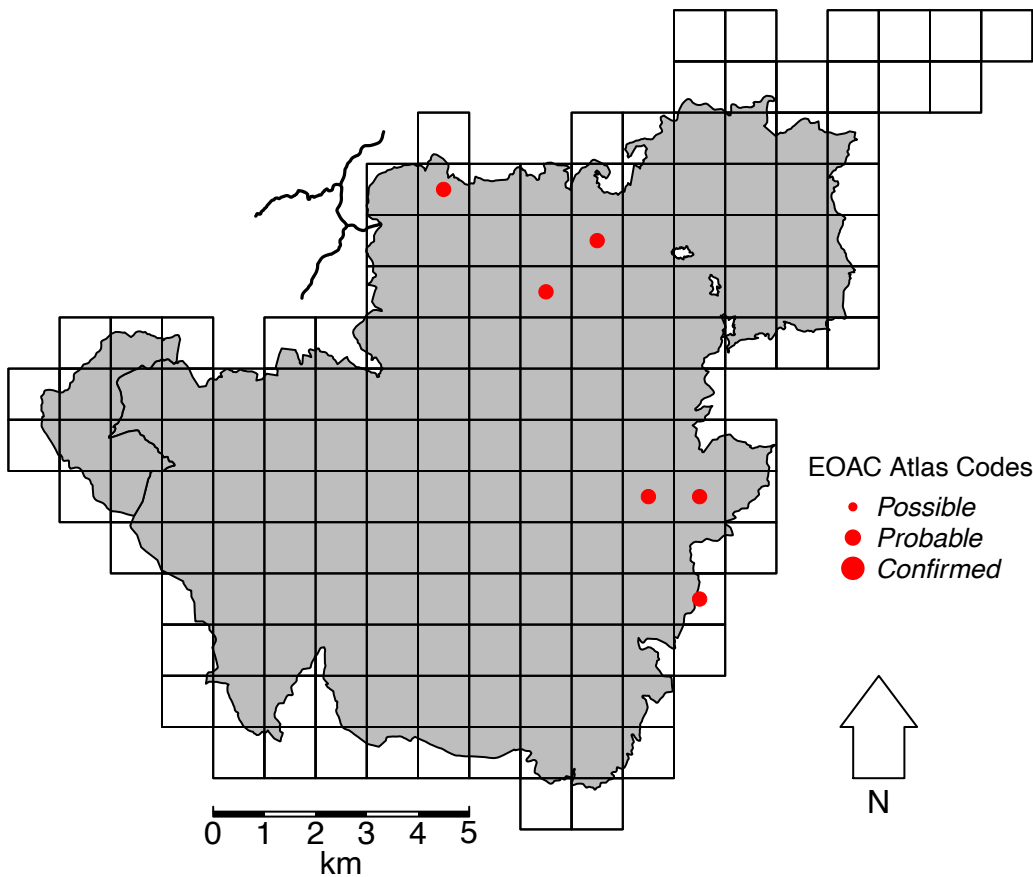

# L svecica

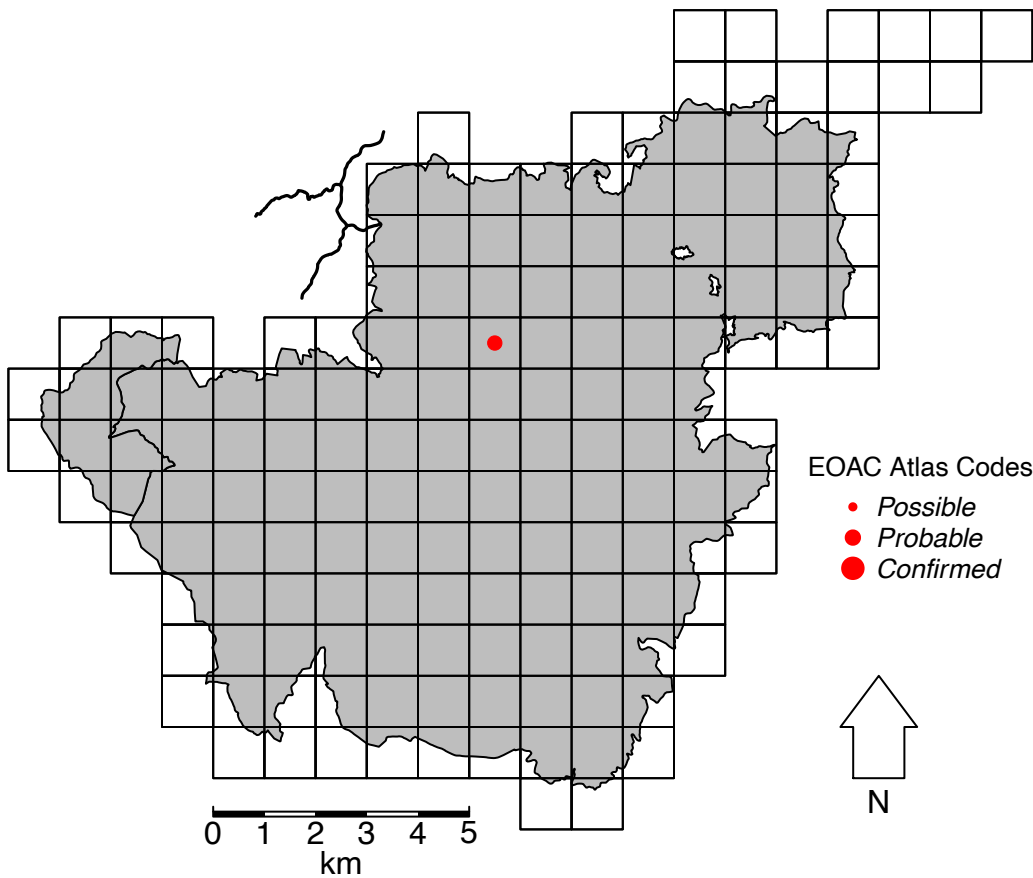

# Lul arb

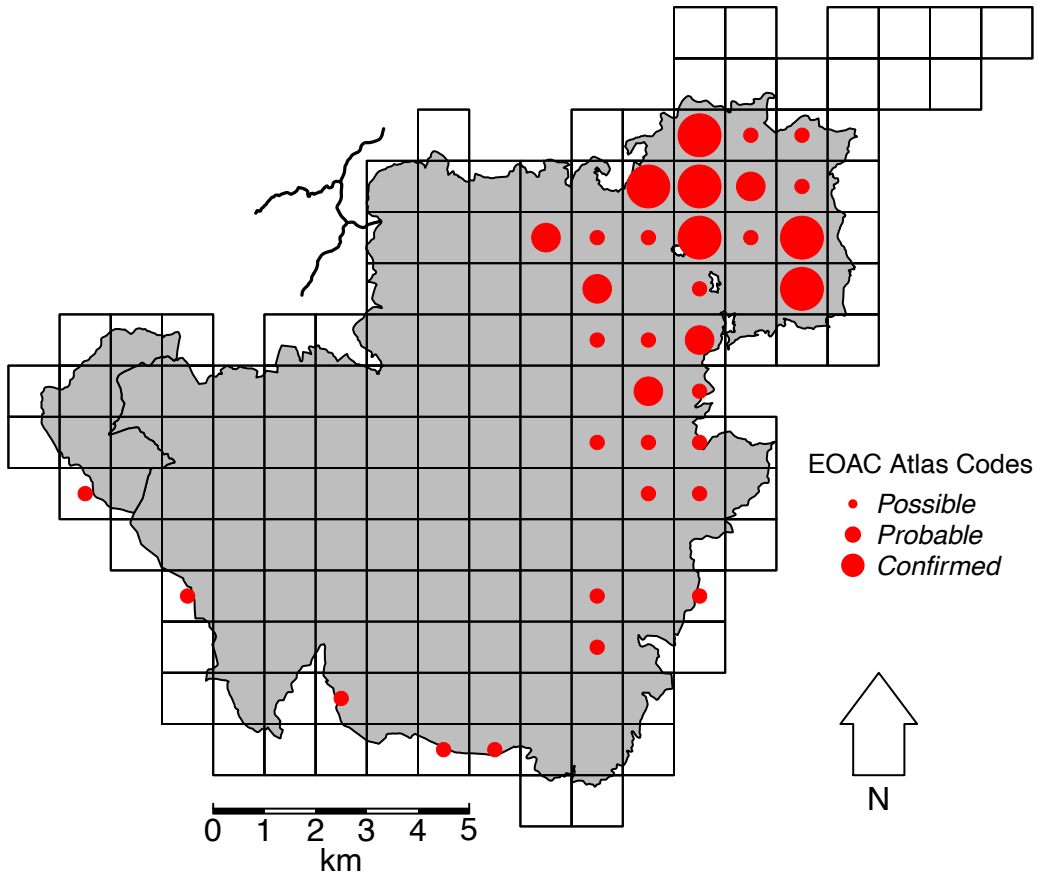

# M alba

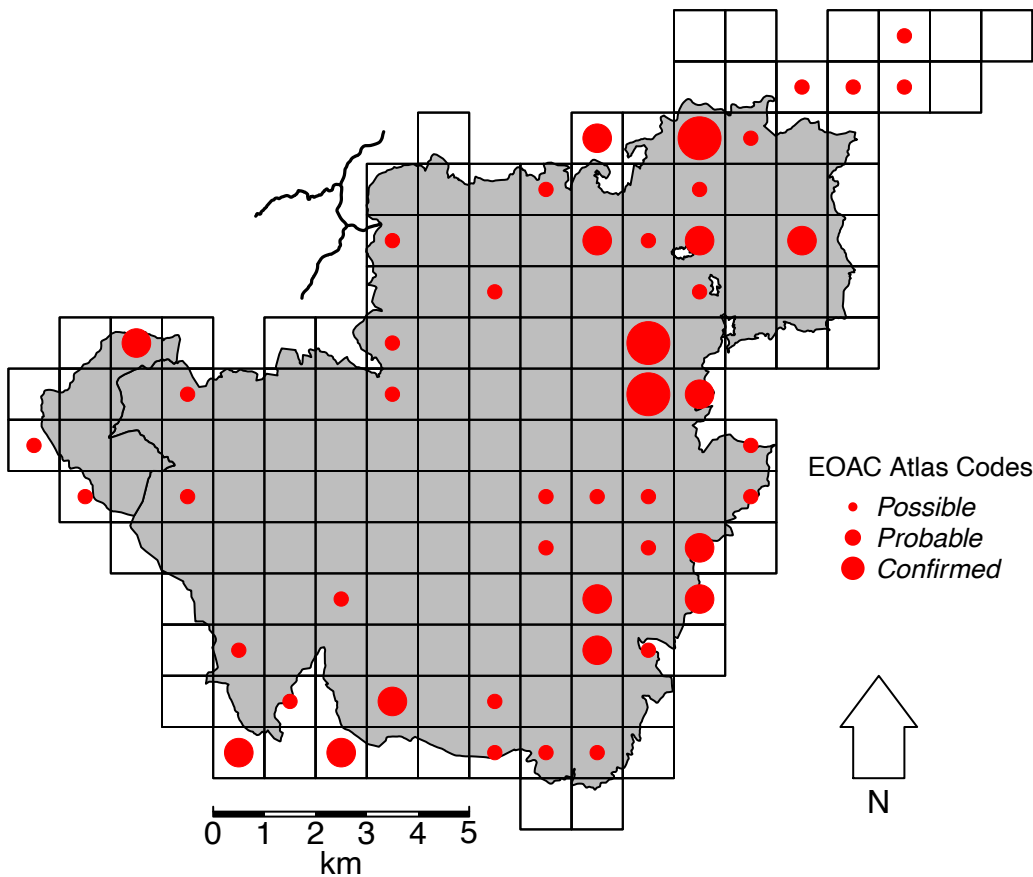

# M caland

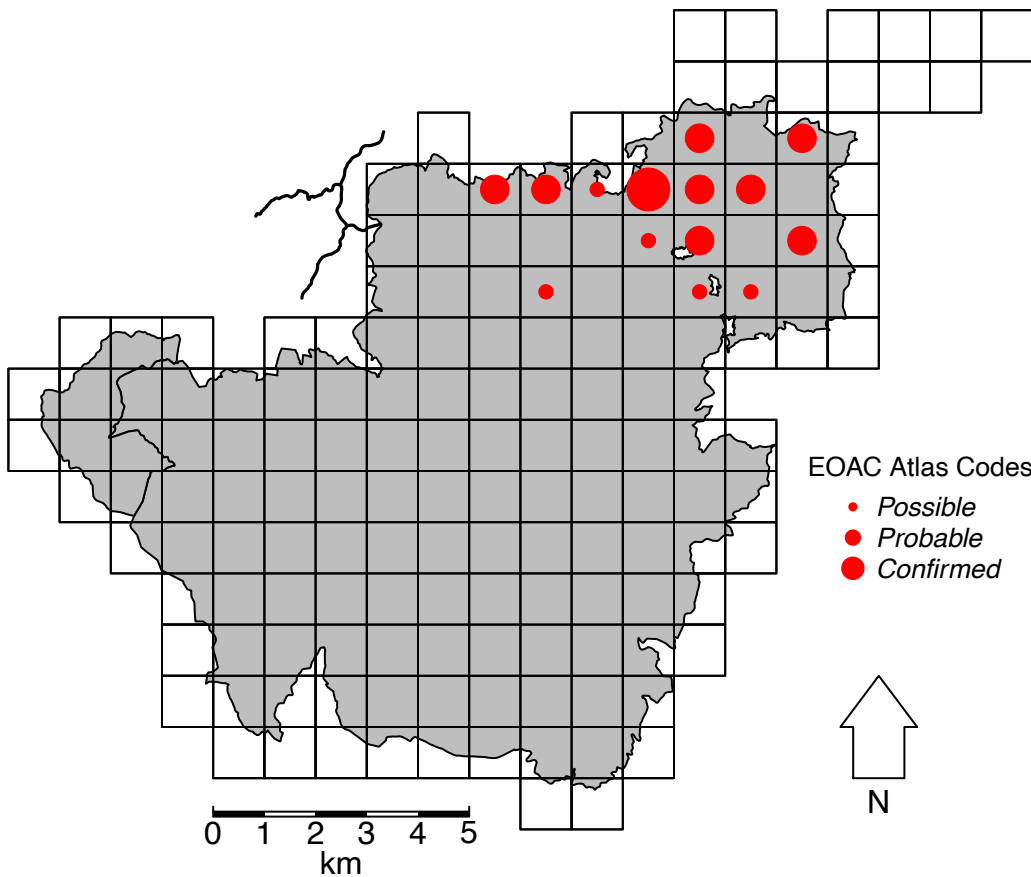

# M ciner

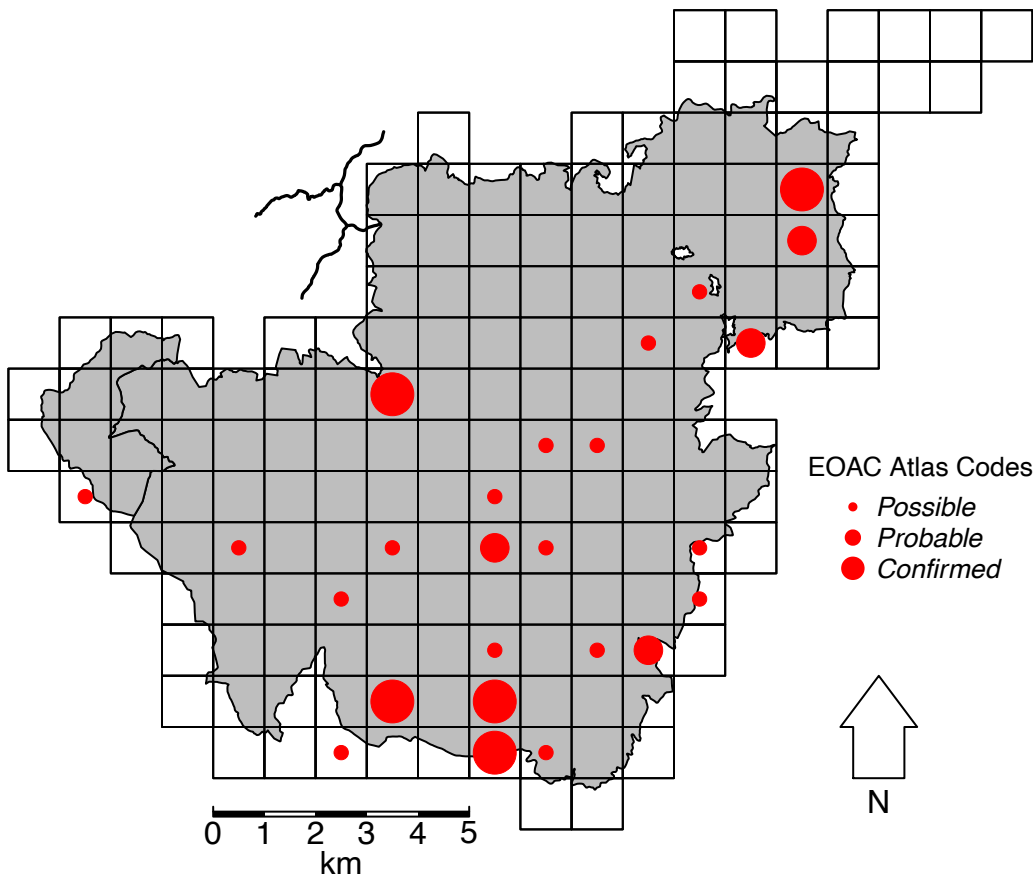

# M flava

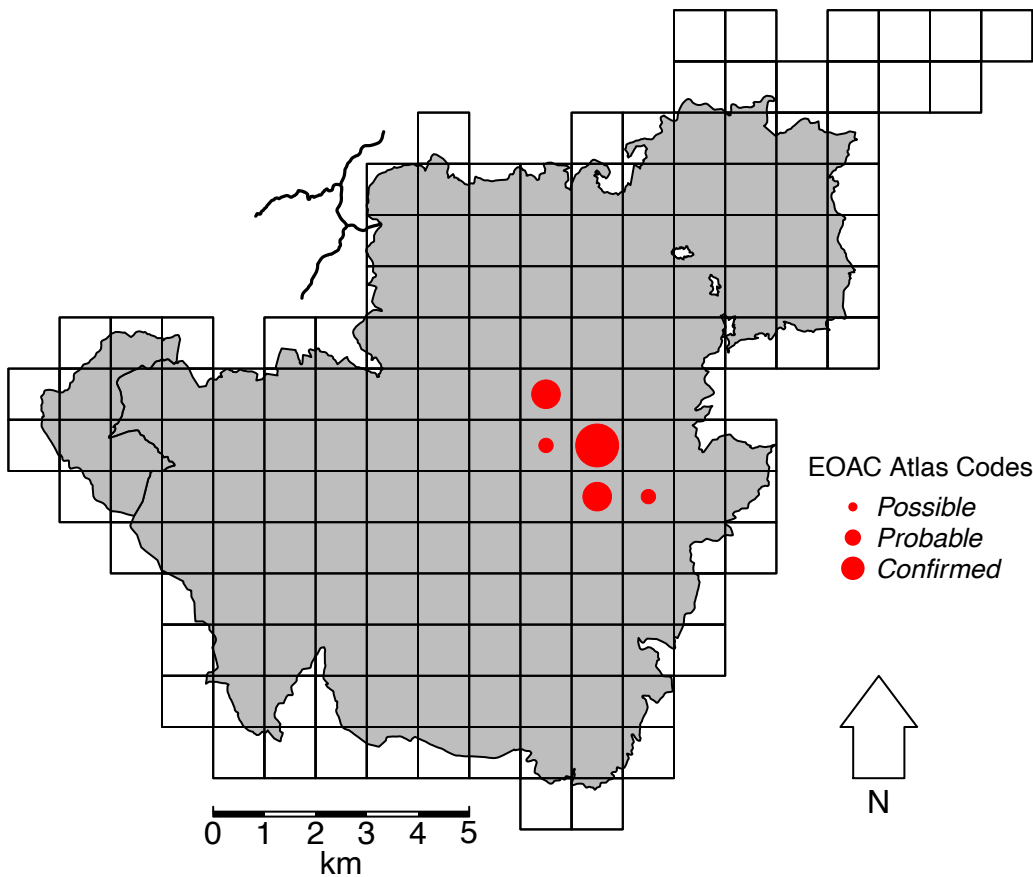

**M mig**

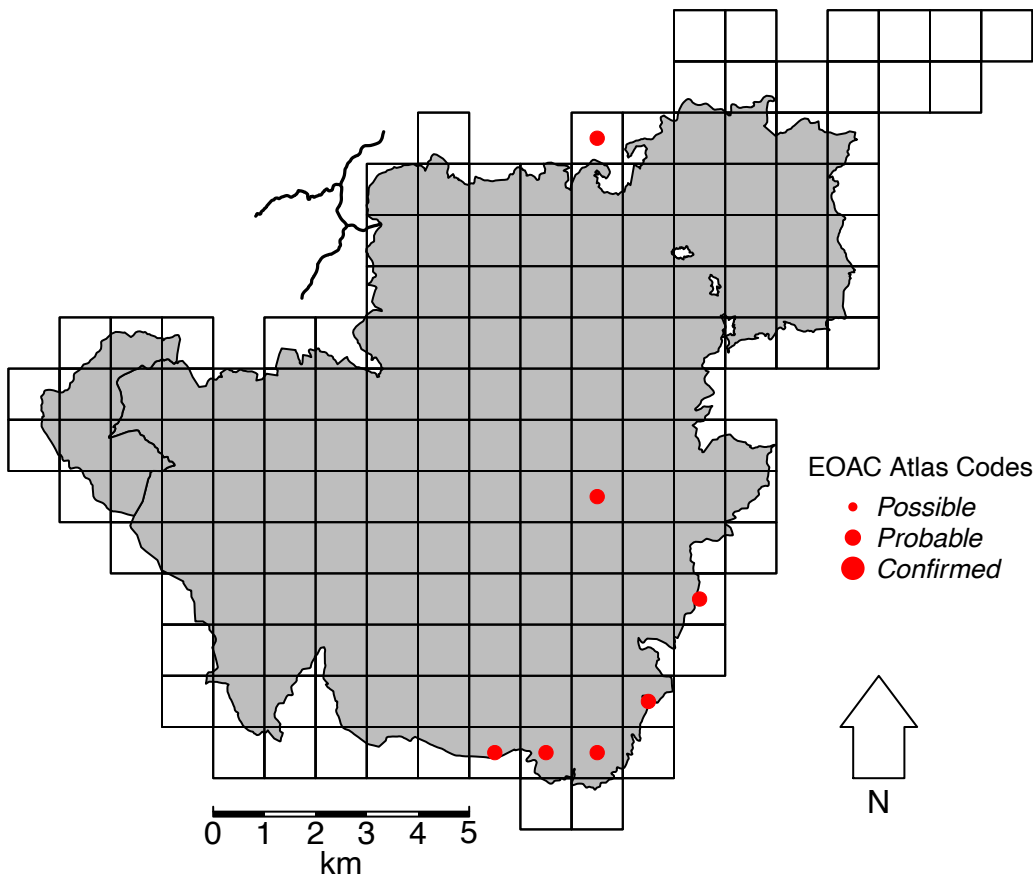

M mil

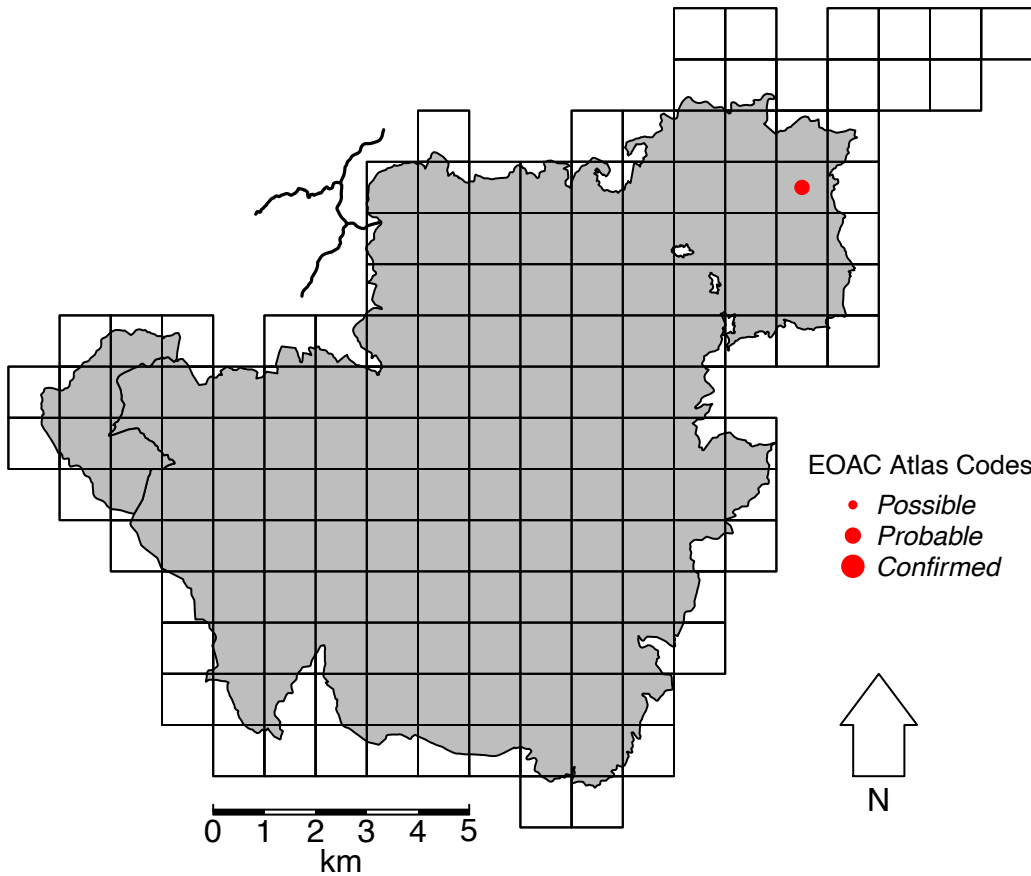

# M saxat

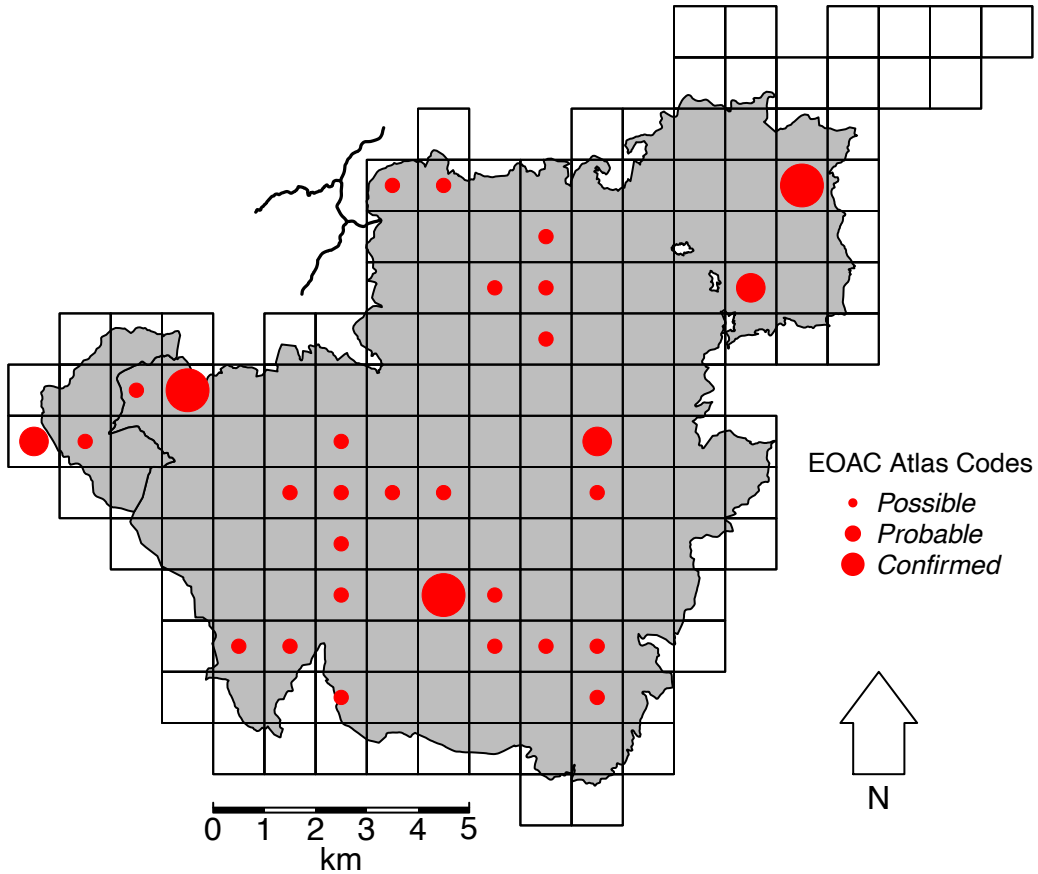

# M solit

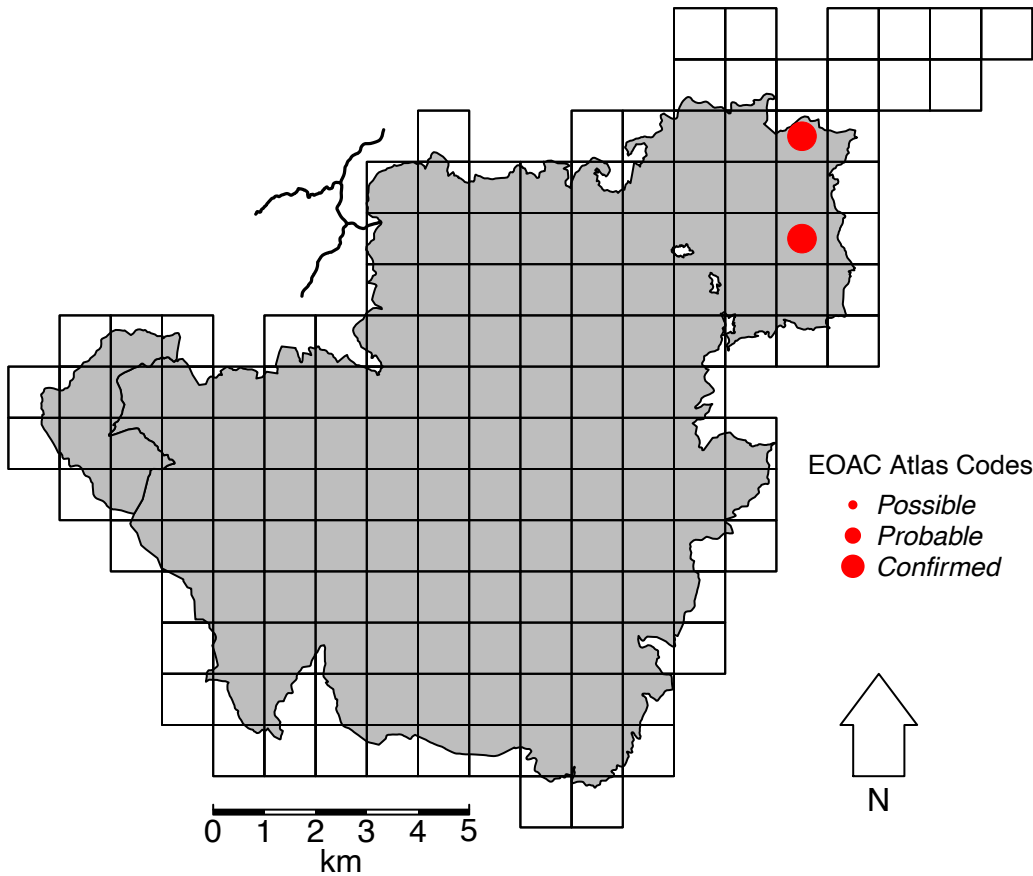

# M striata

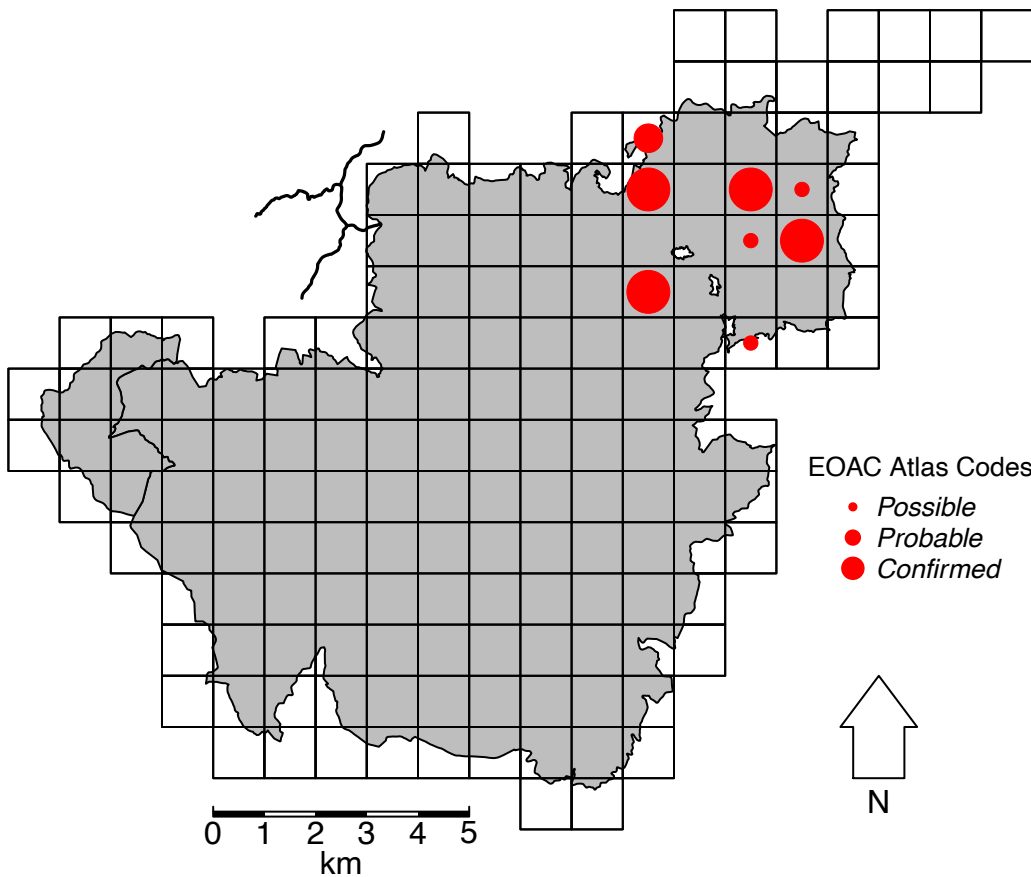

# M. apíast

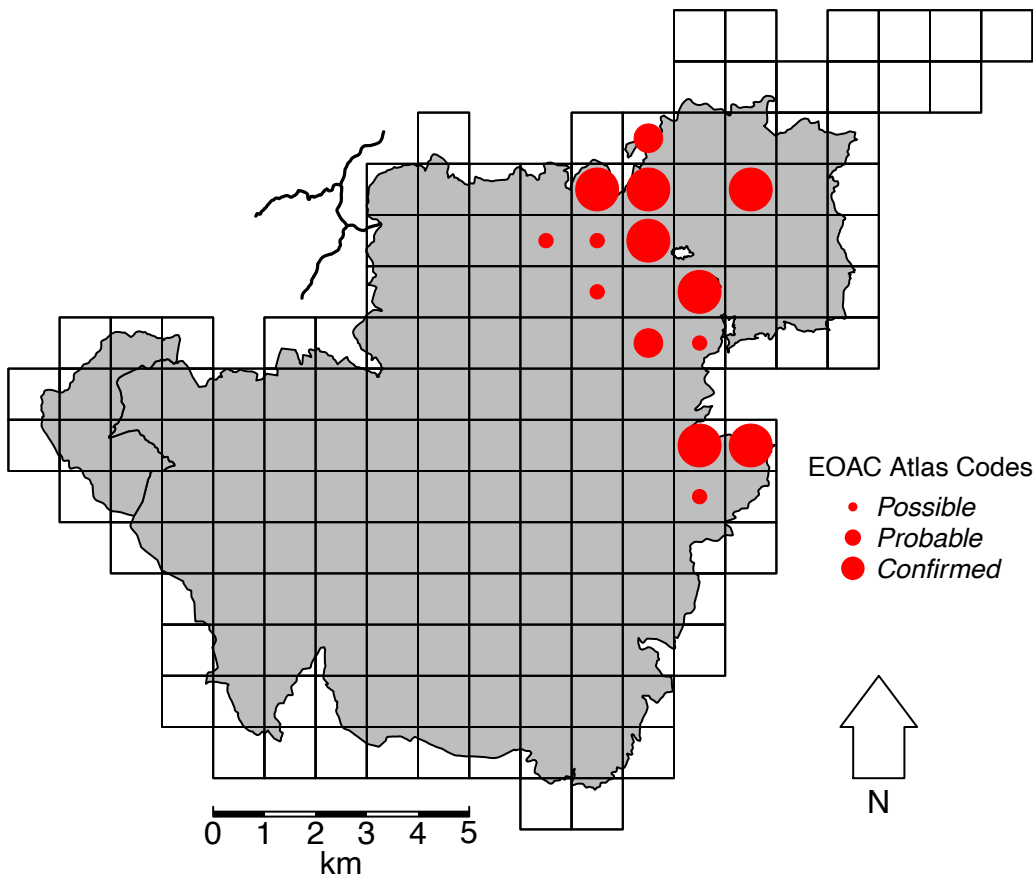

# N percnopt

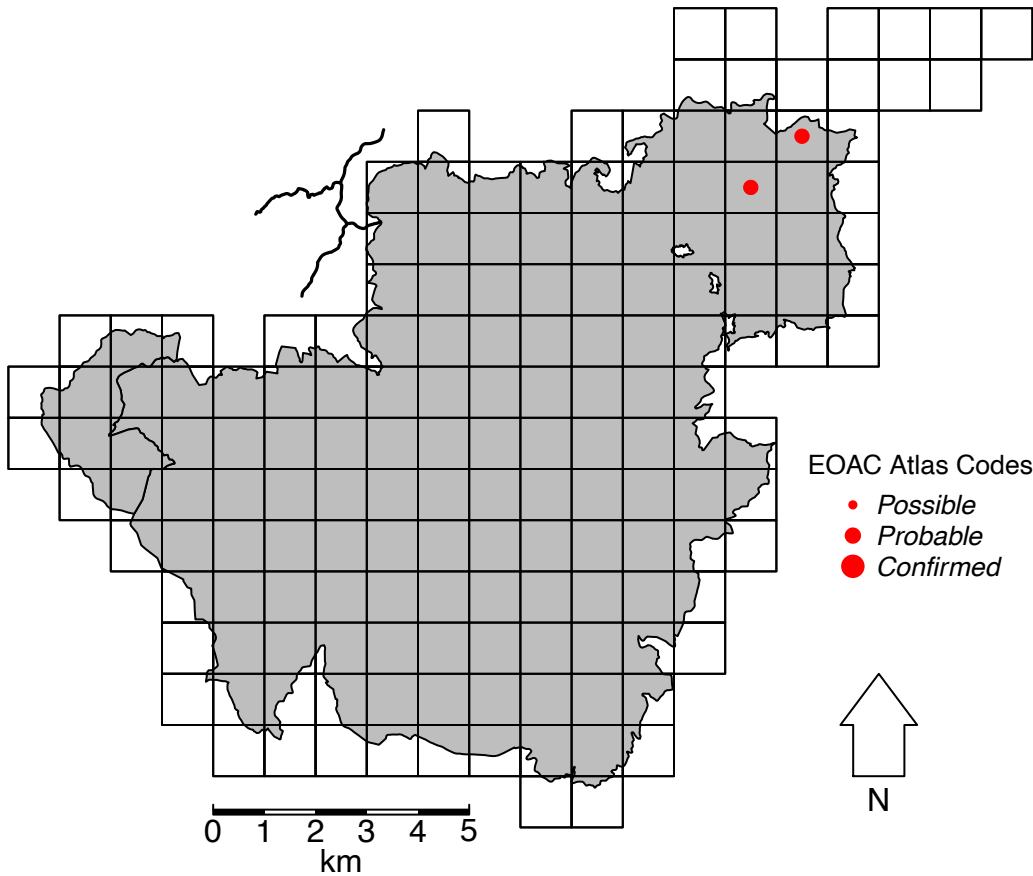

# O oenan

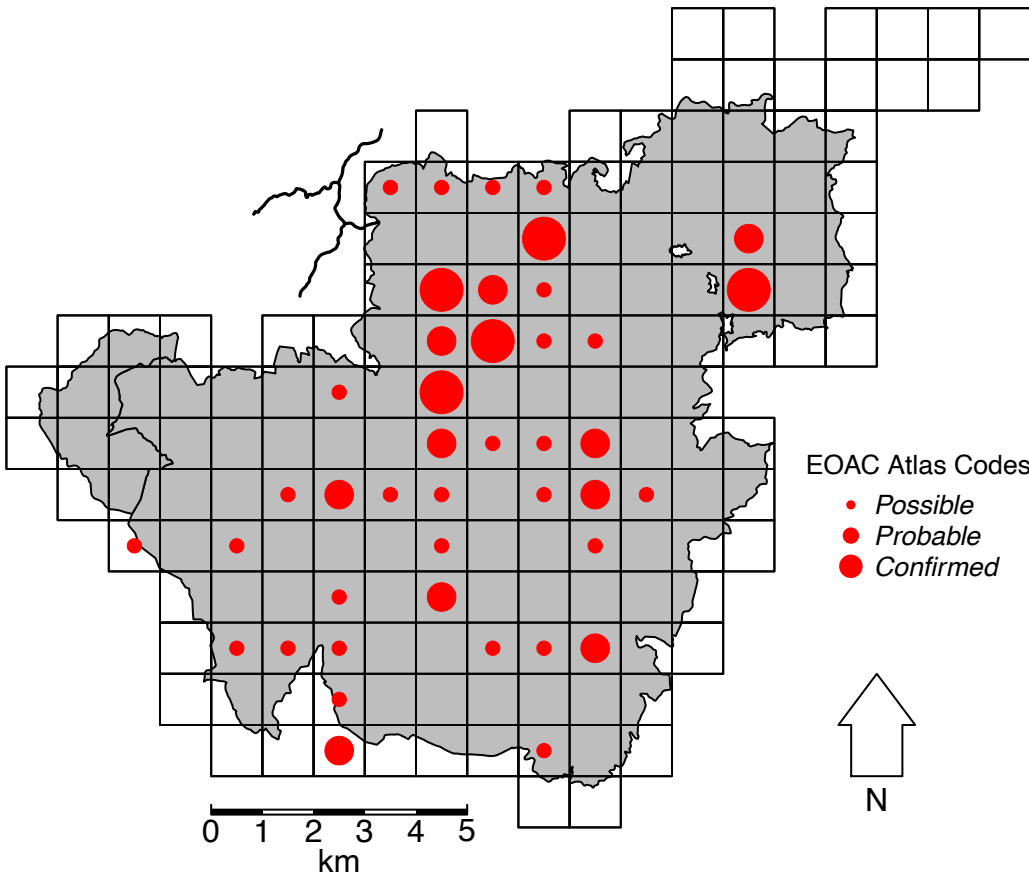

# O oriolus

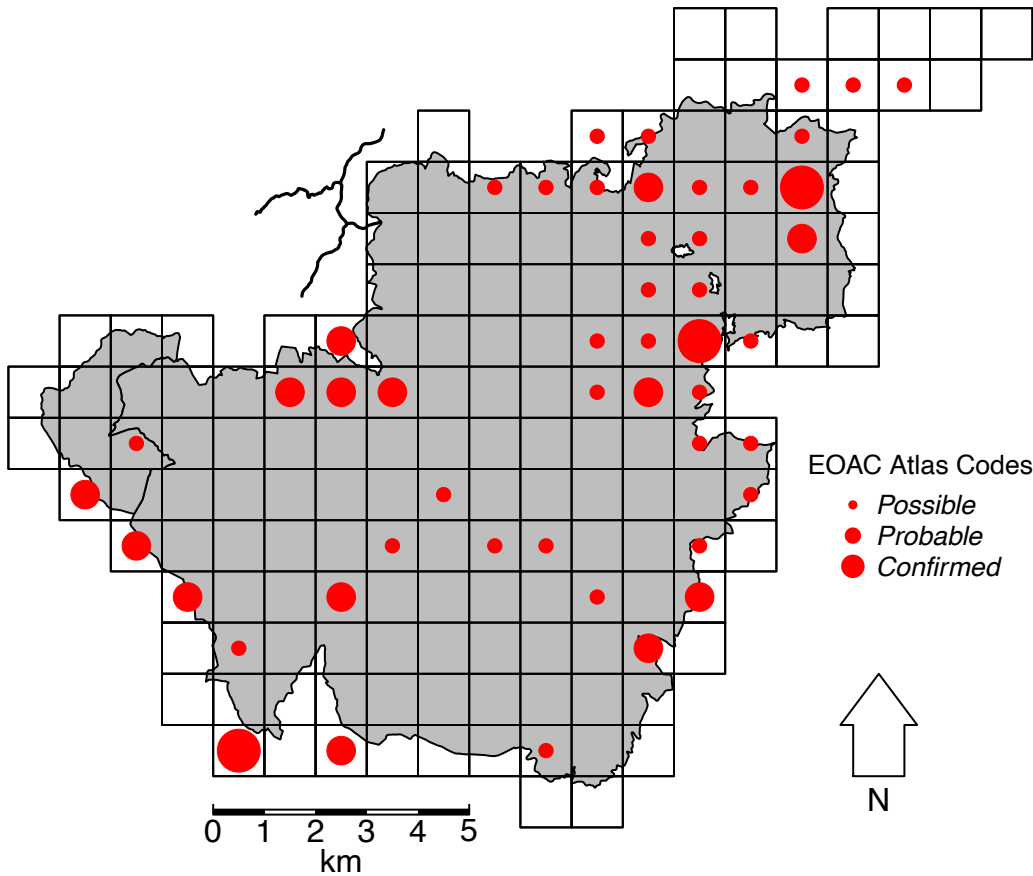

# P apiv

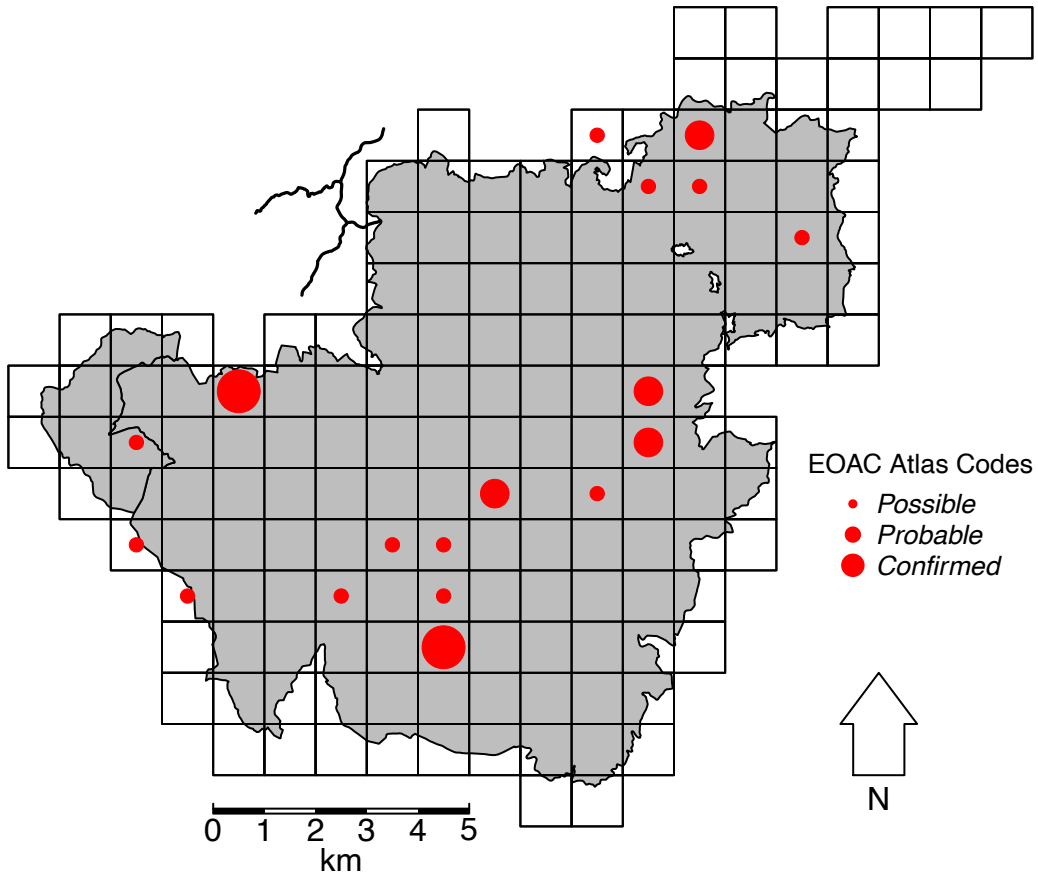

# P ater

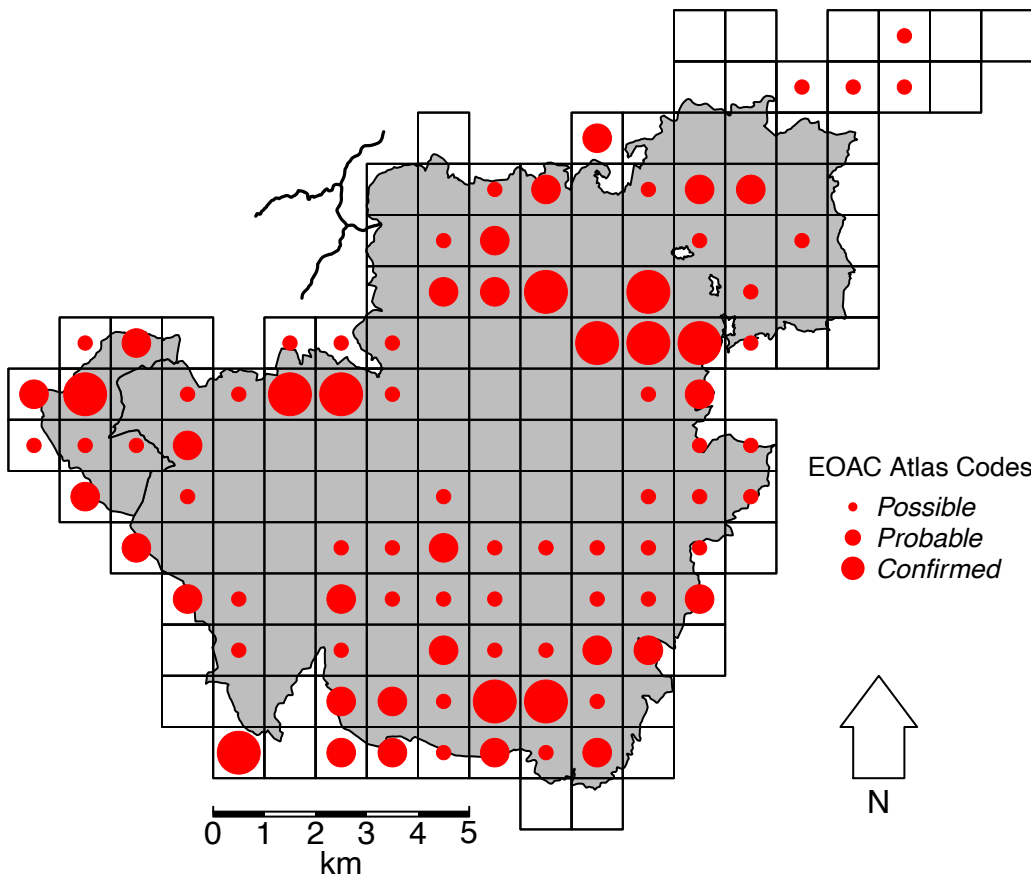

# **P bonelli**

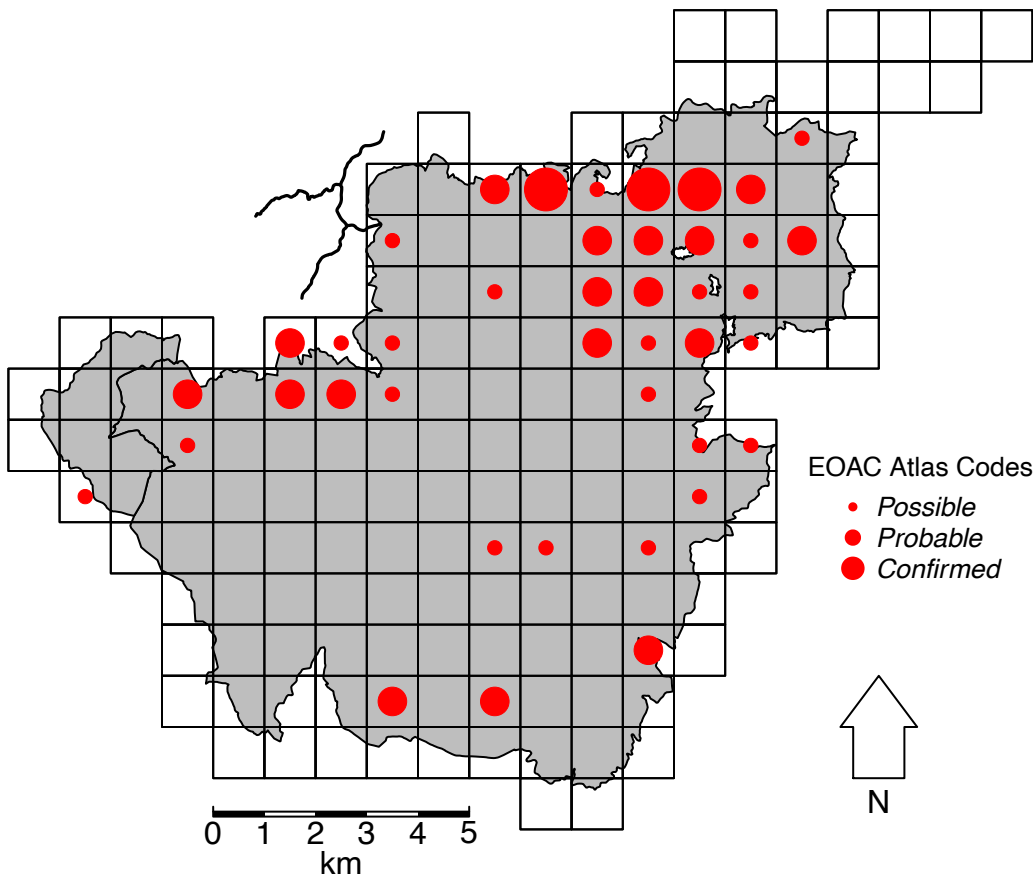

# P caer

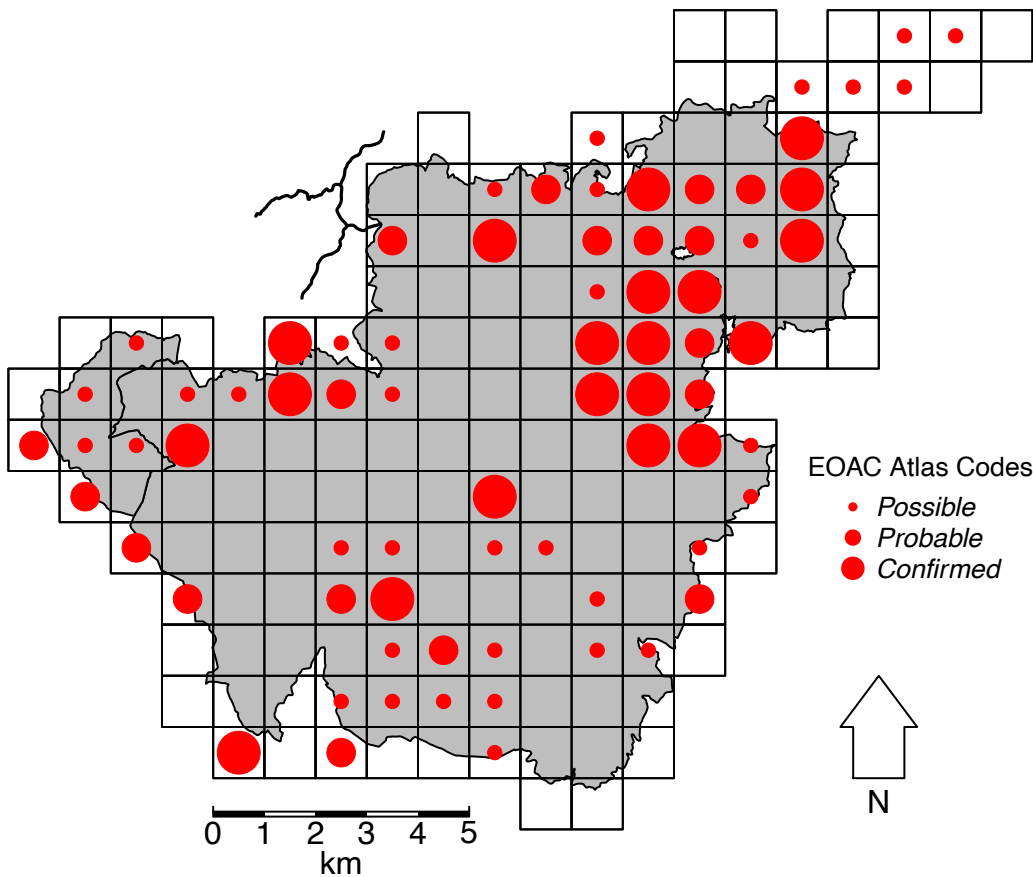

# P collyb

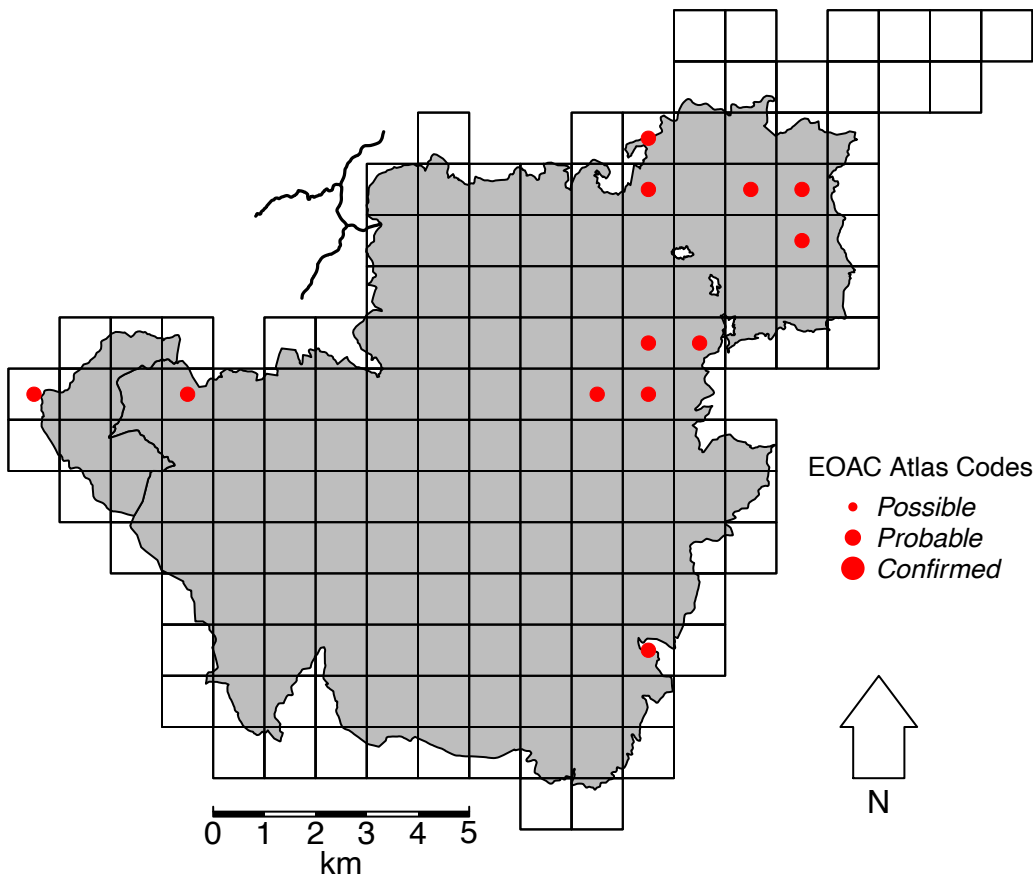

# P crist

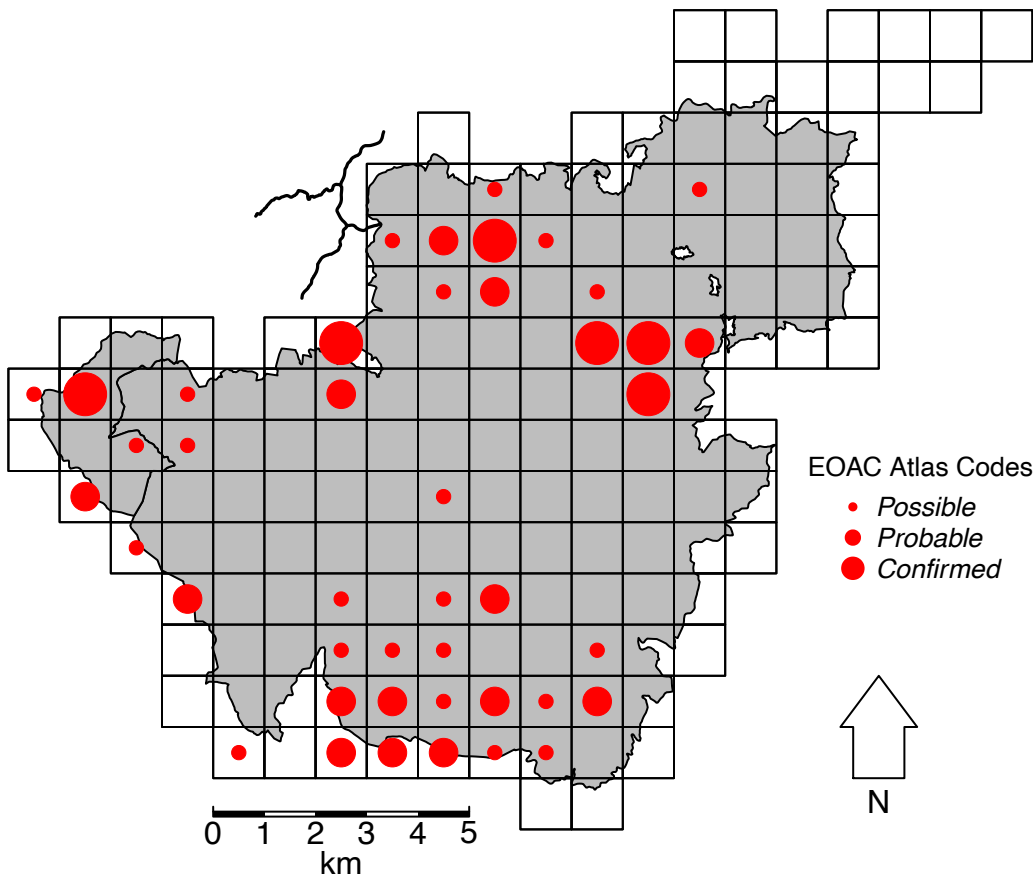

# P dom

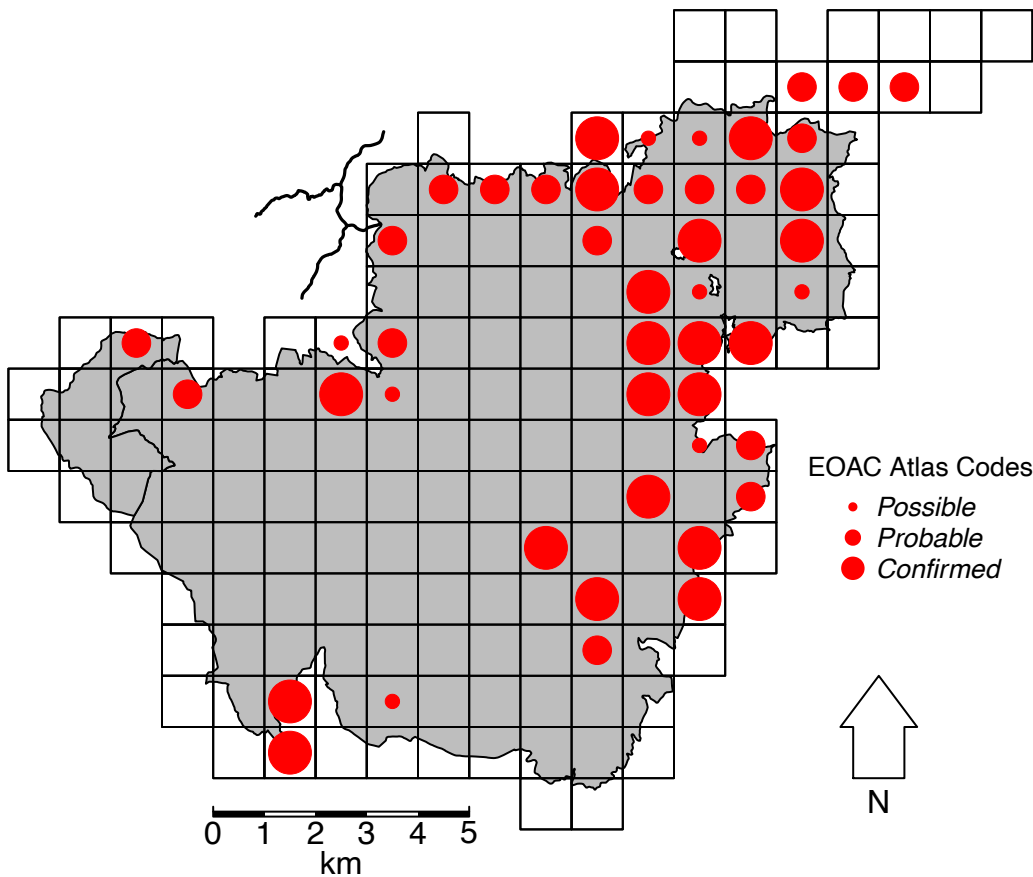

# **P ibericus**

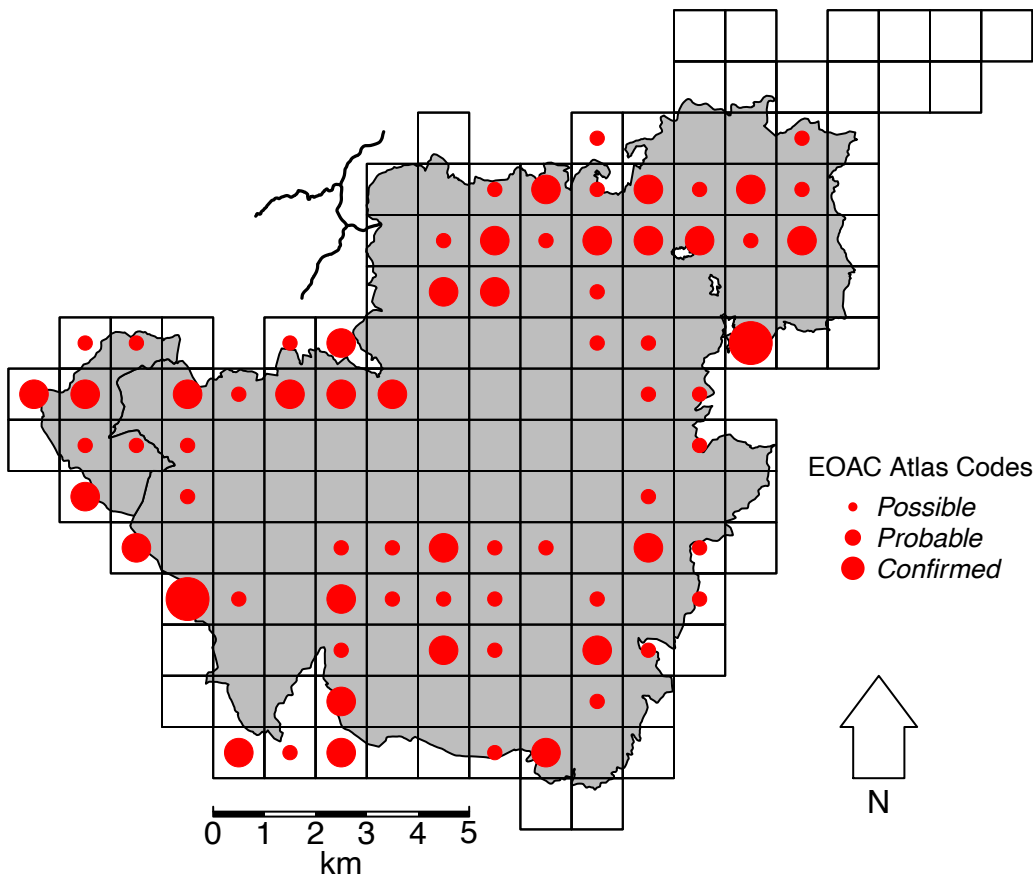

# P major

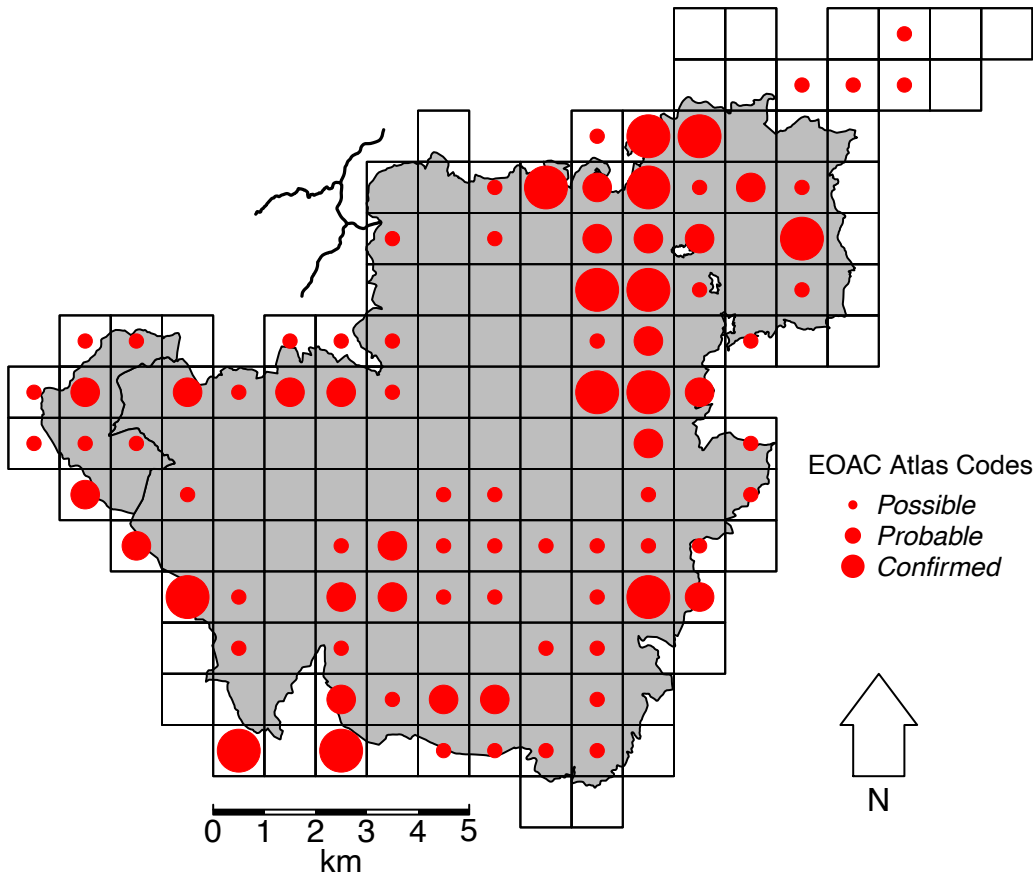

# P modul

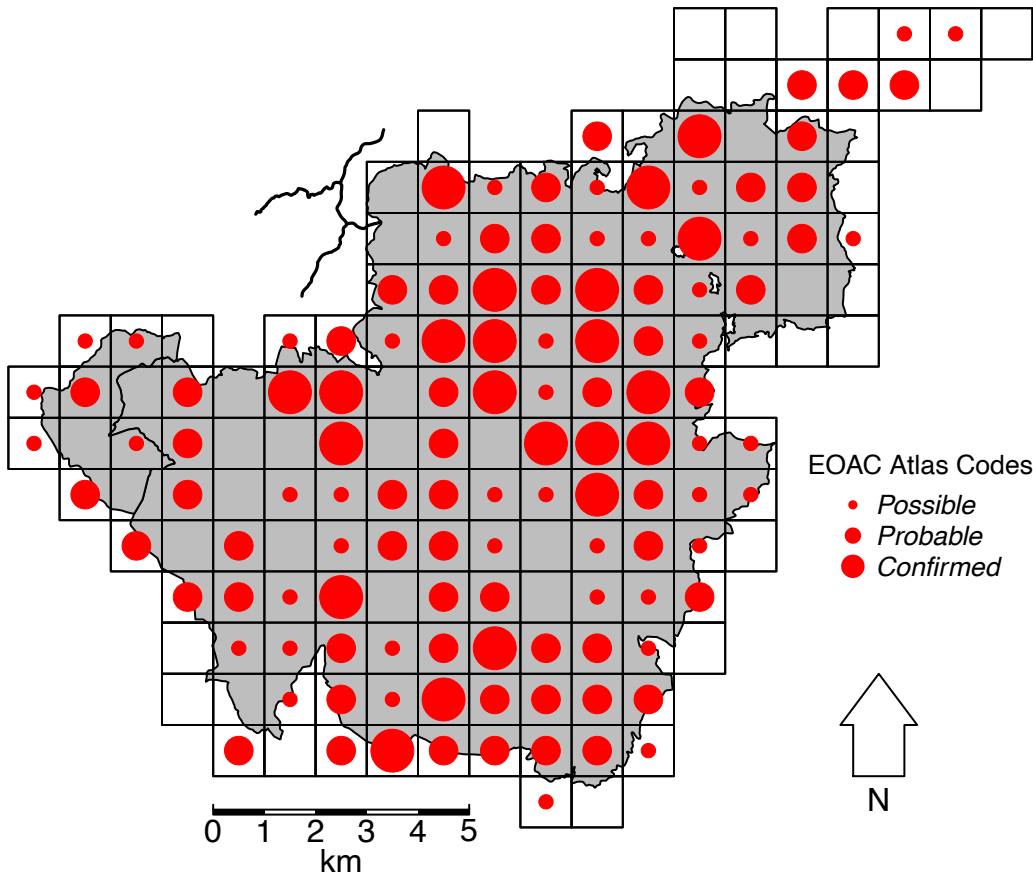

# P mont

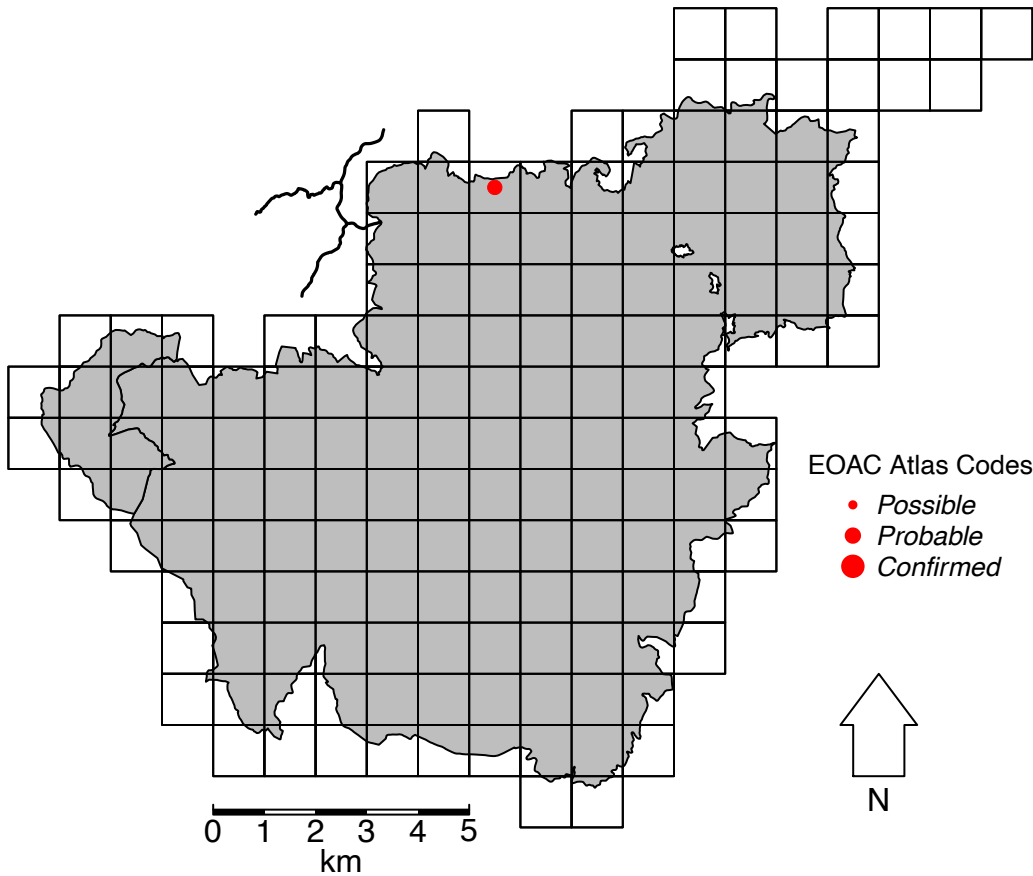

# P ochrur

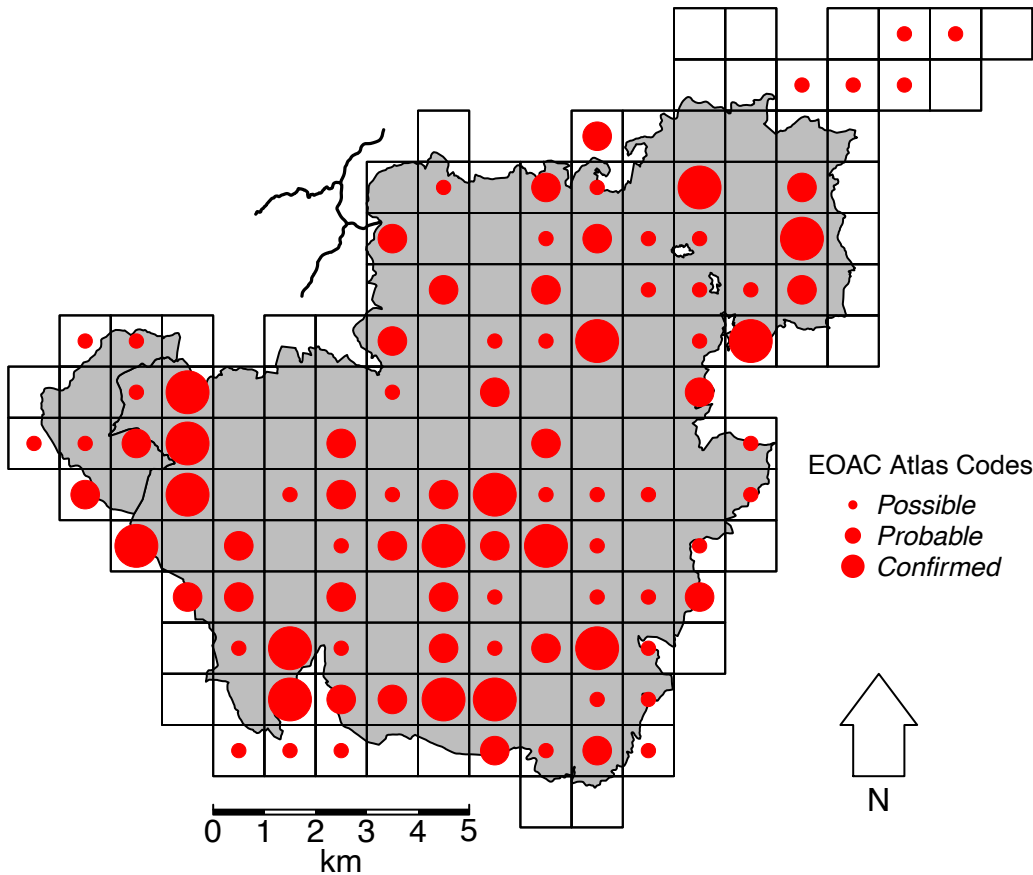

# P phoenic

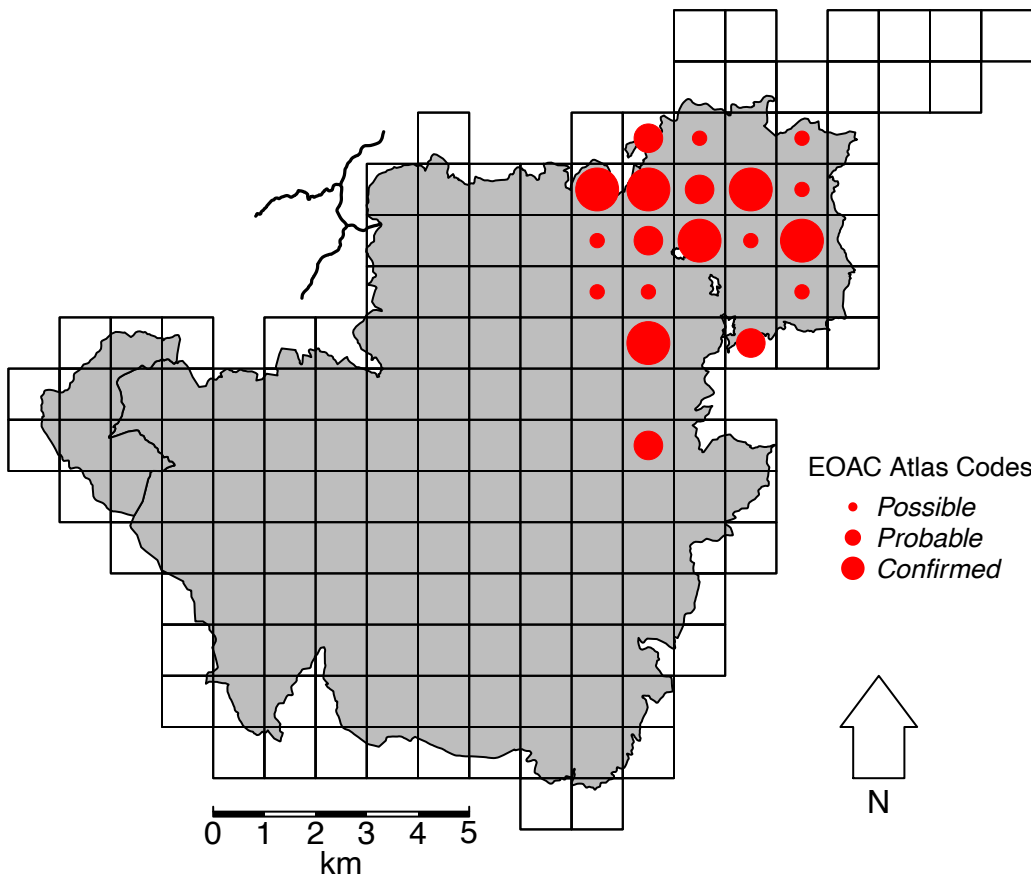

# P pyrr

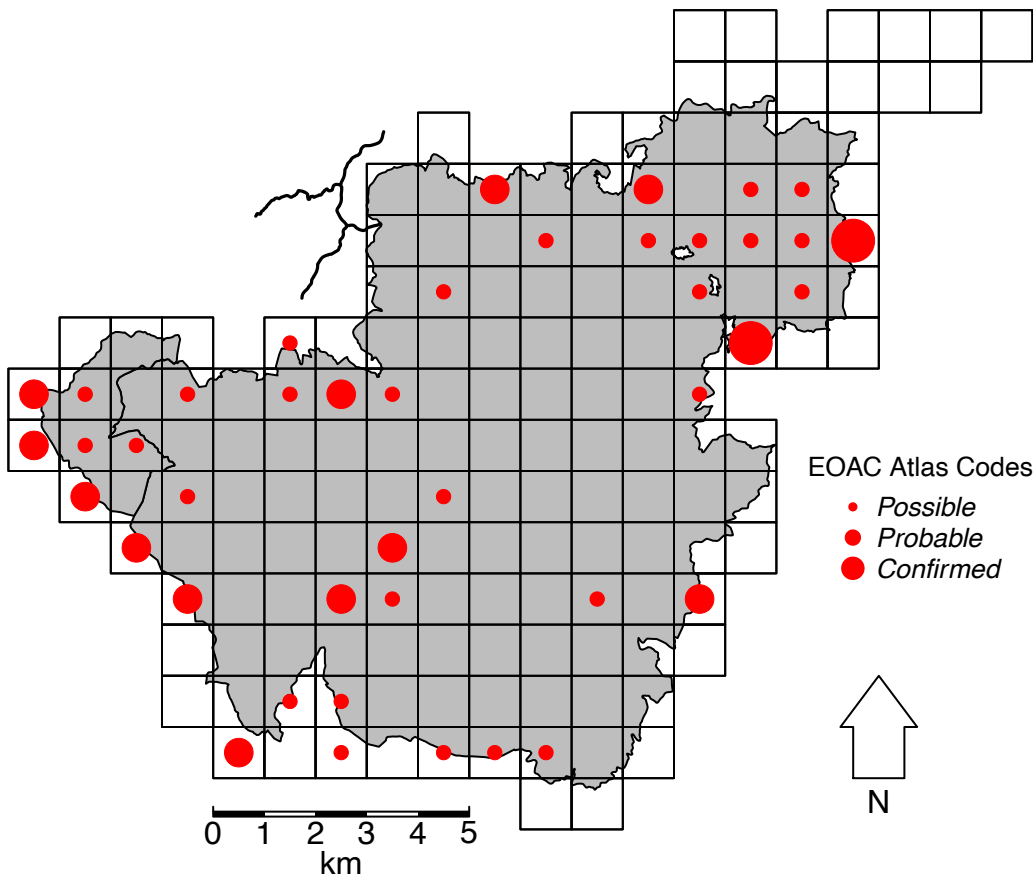

# P pyrrho

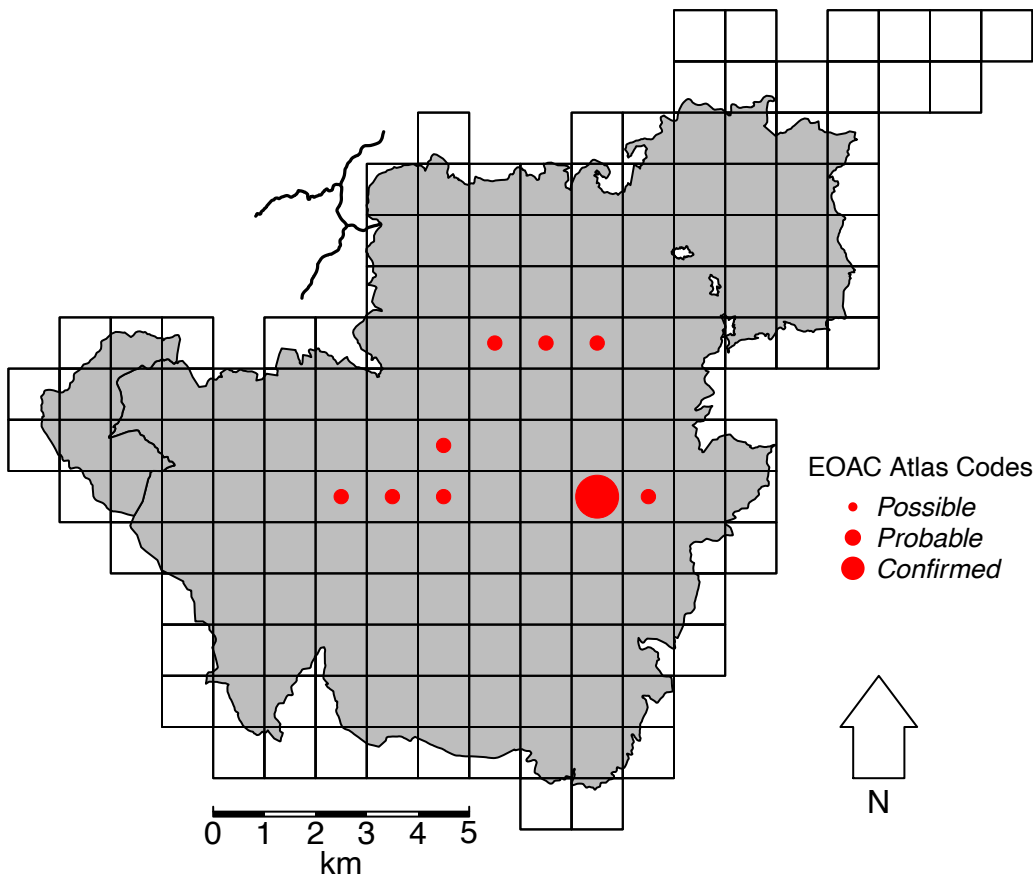

# P rupest

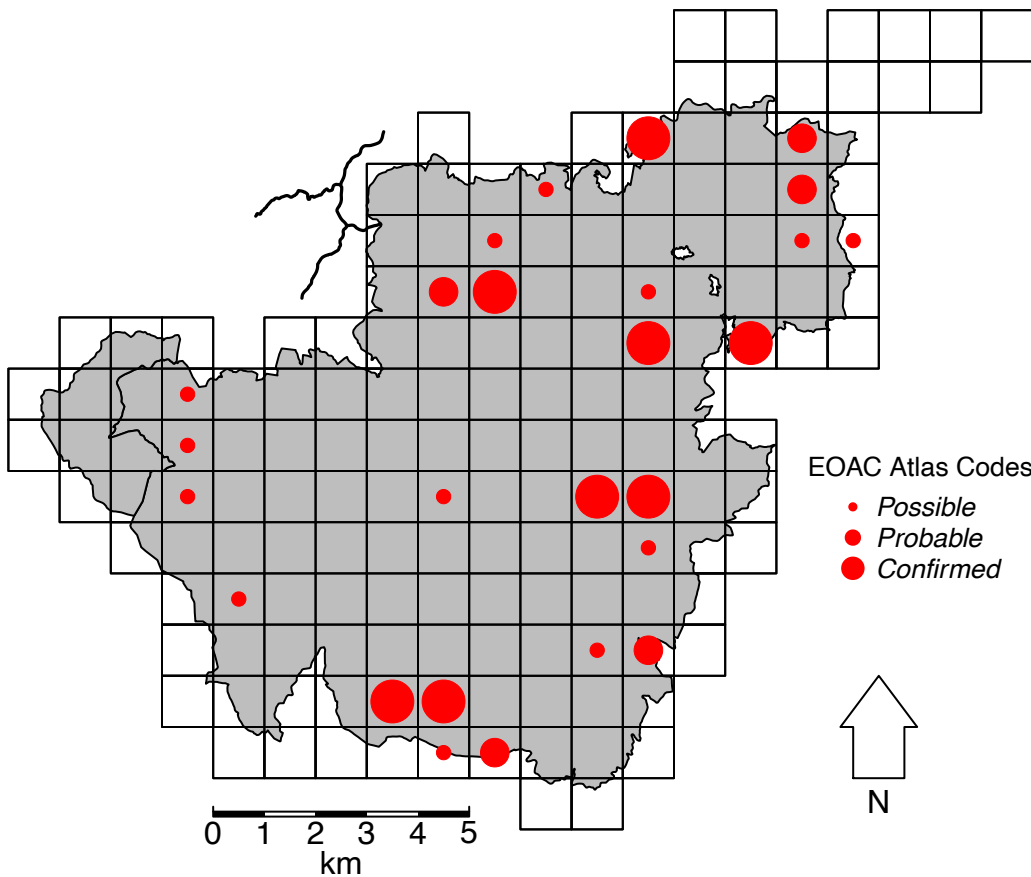

# P viridis

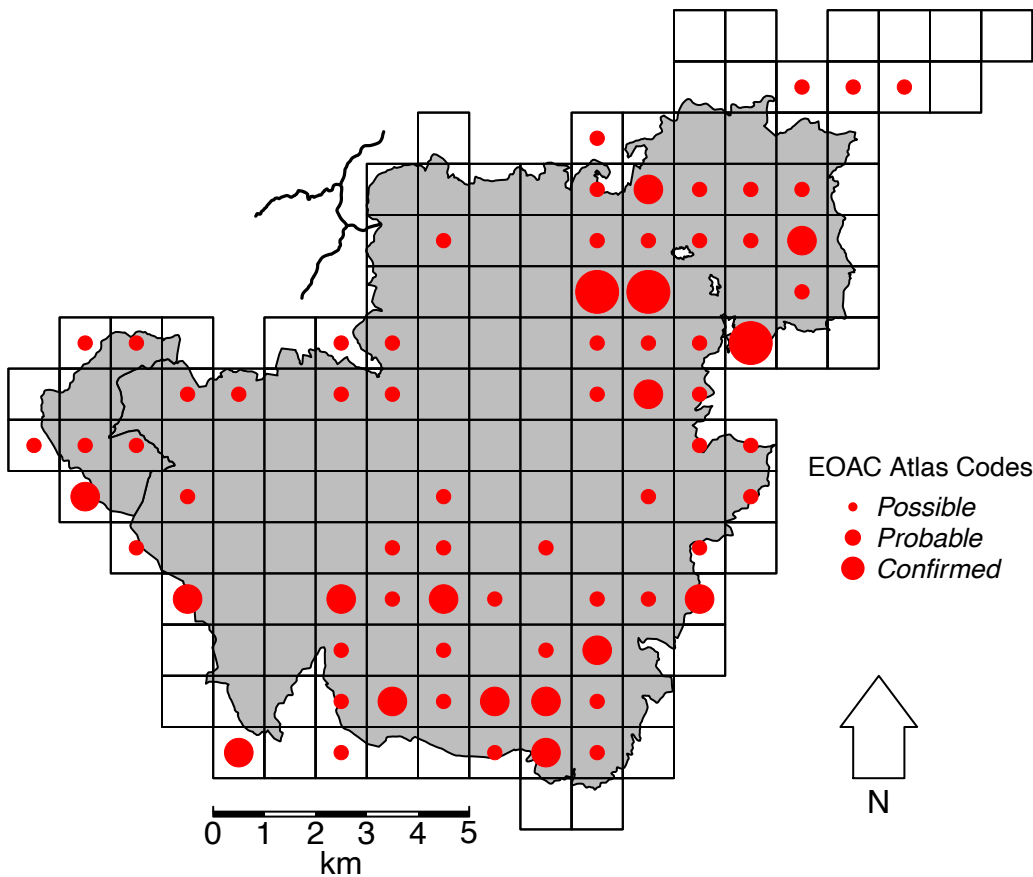

# **P. perdix**

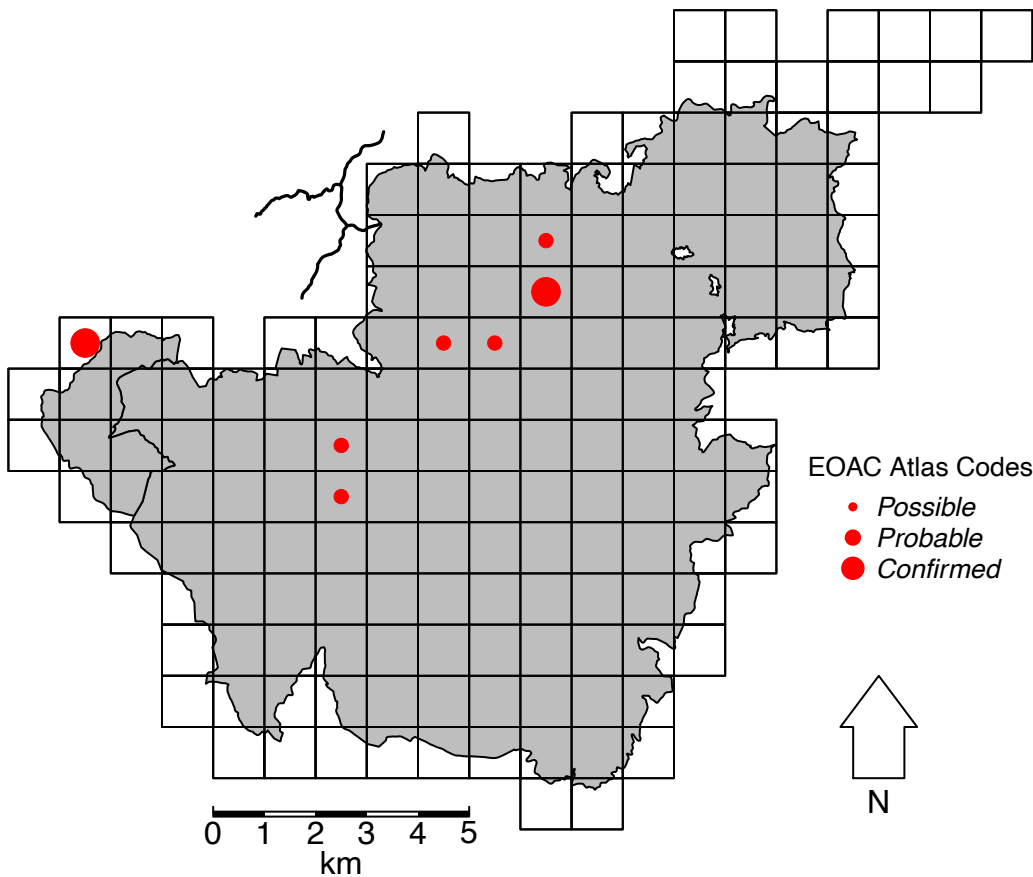

# P. petron

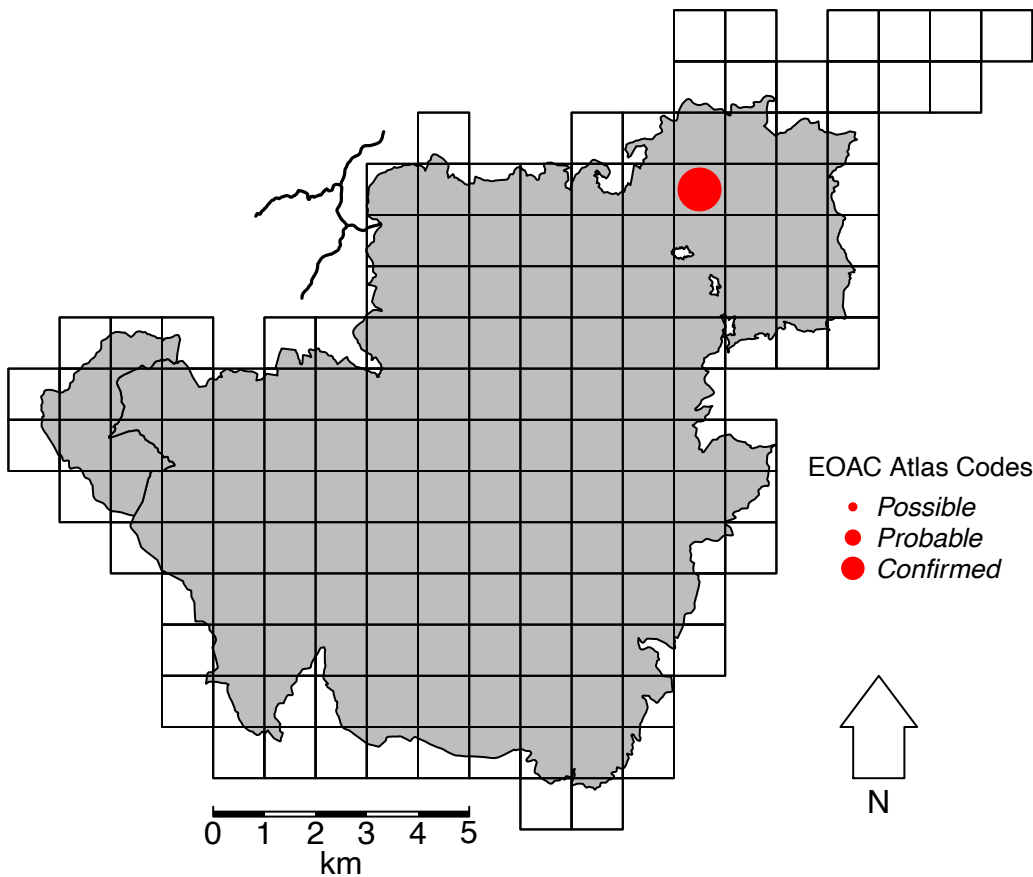

# Phalac carbo

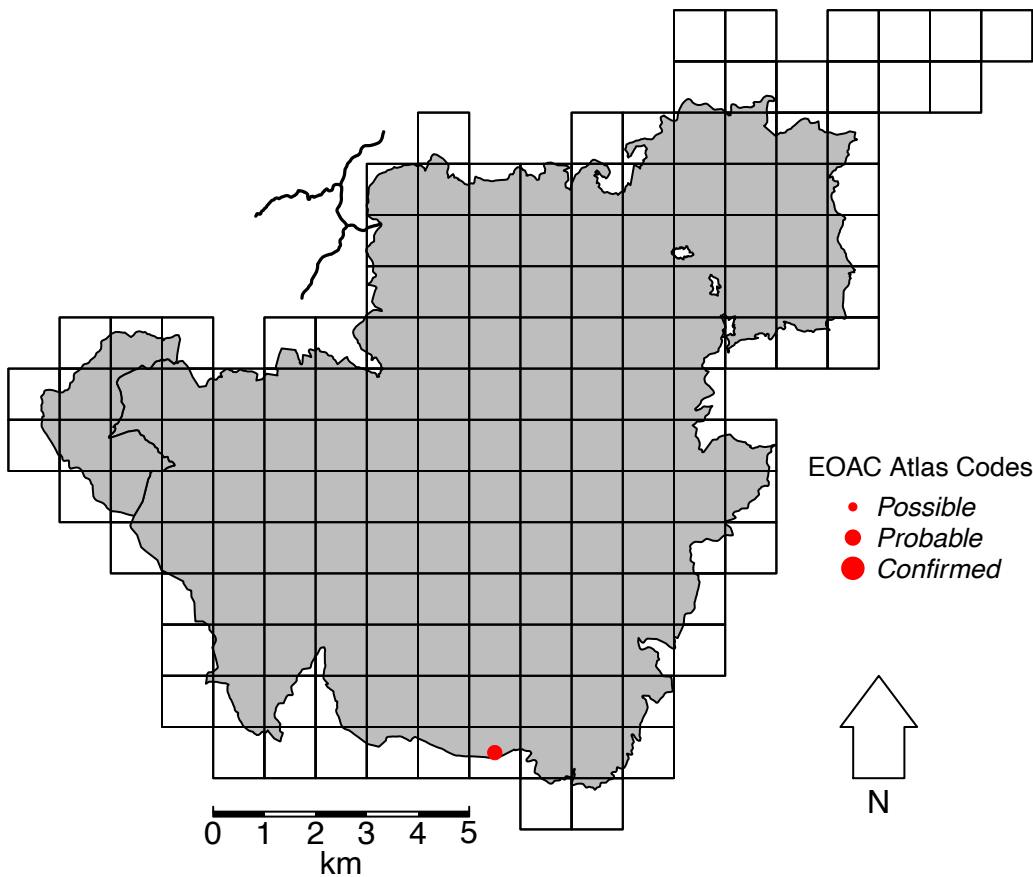

# Pica pica

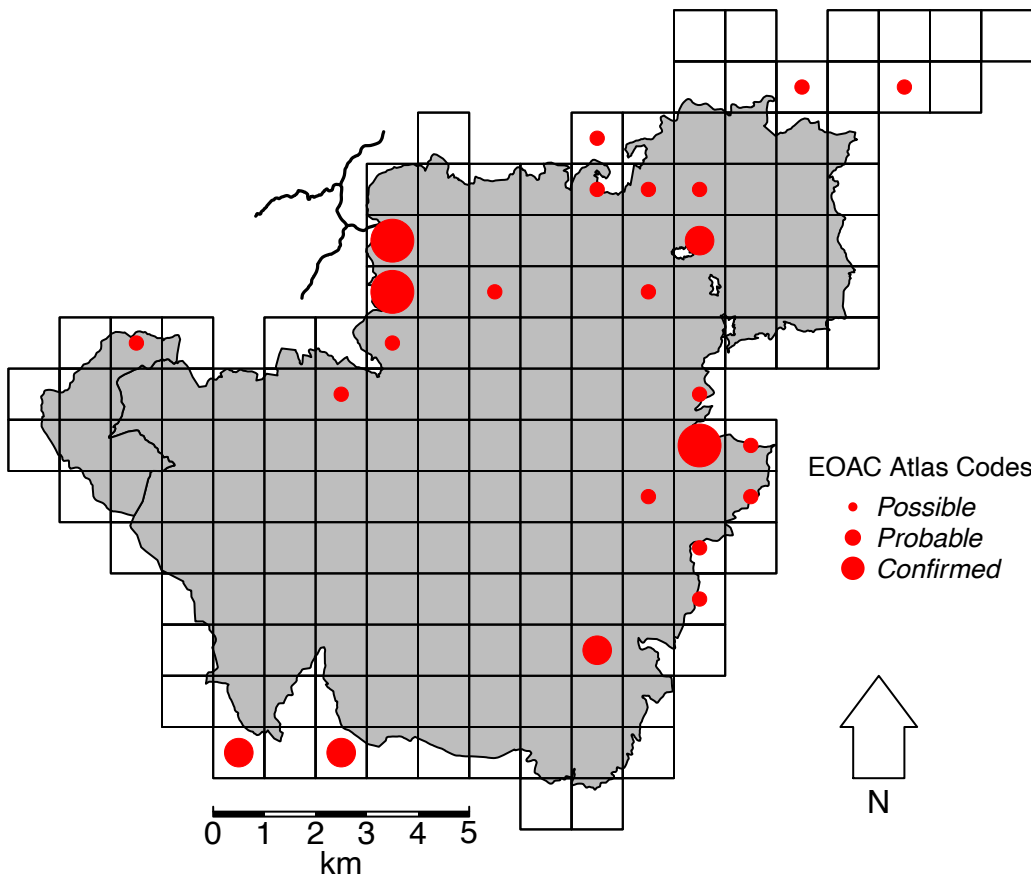

# R ignic

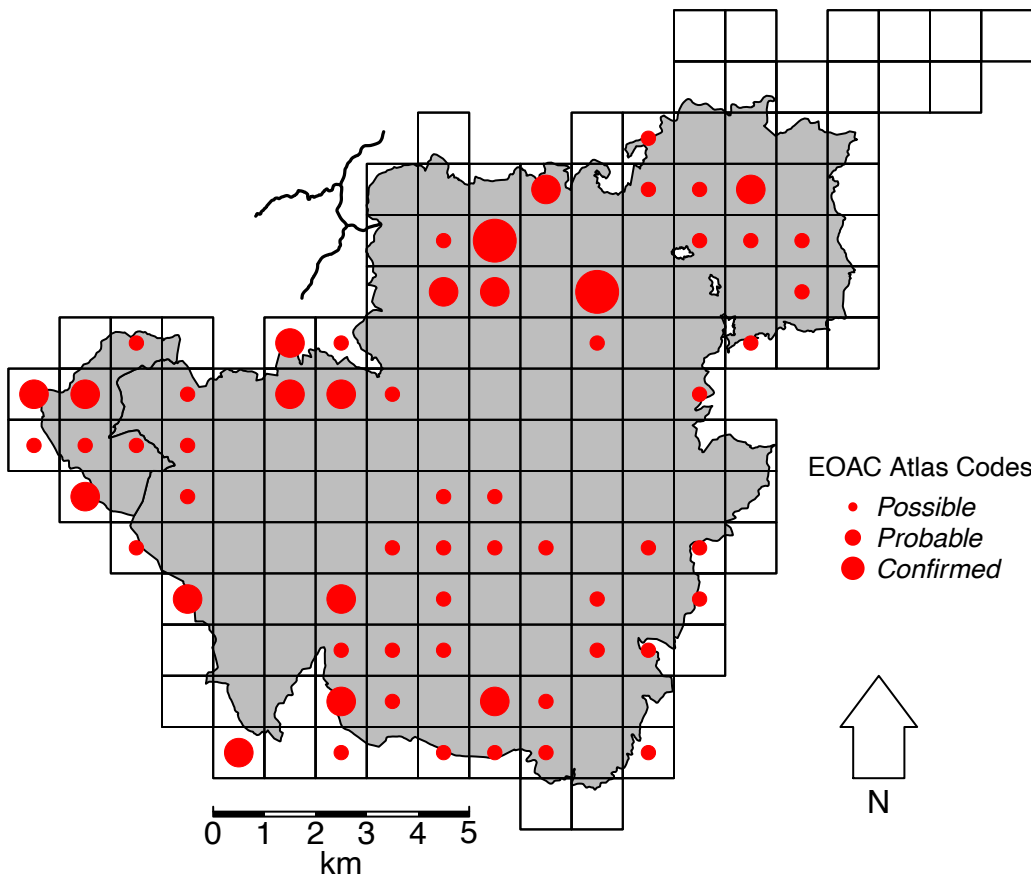

# R regulus

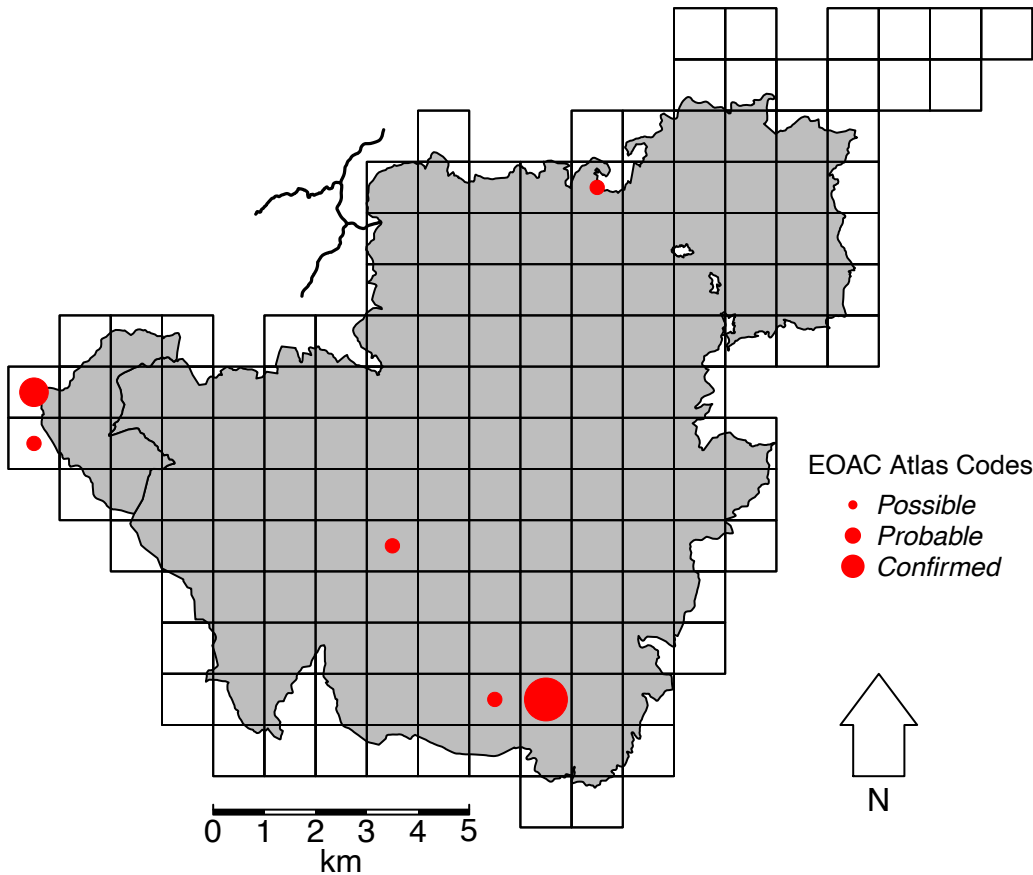

# R ripar

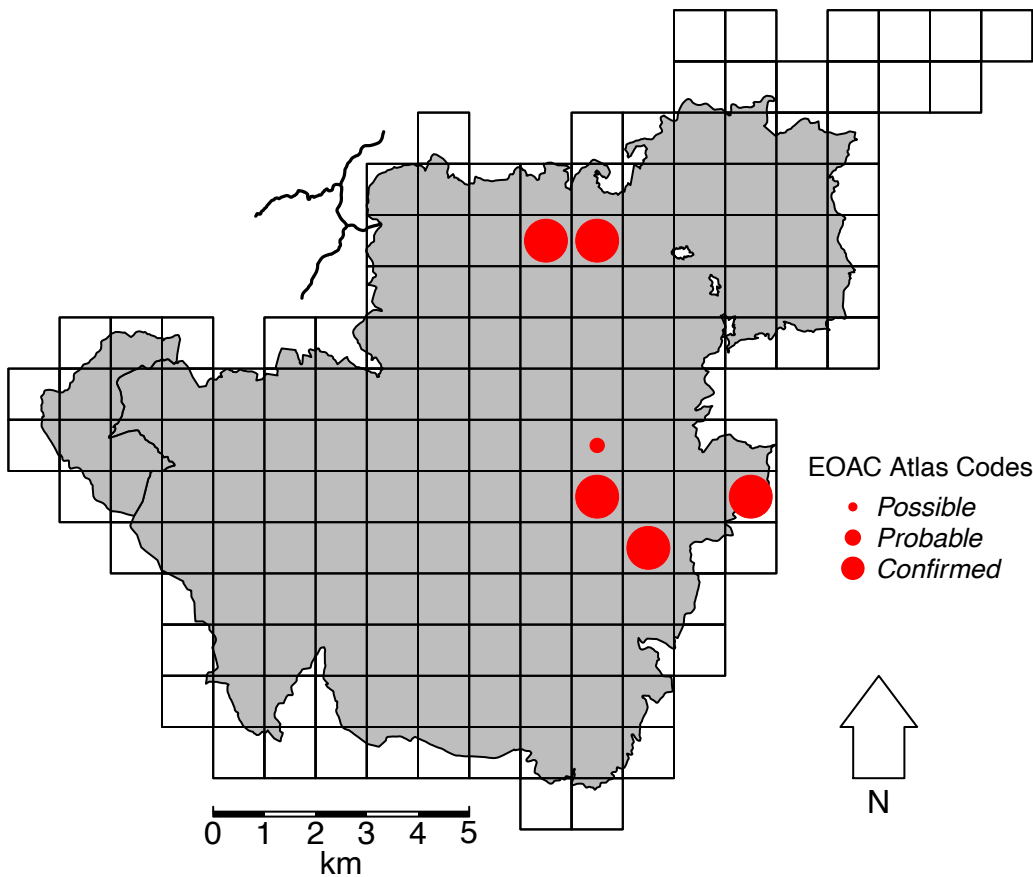

# S aluco

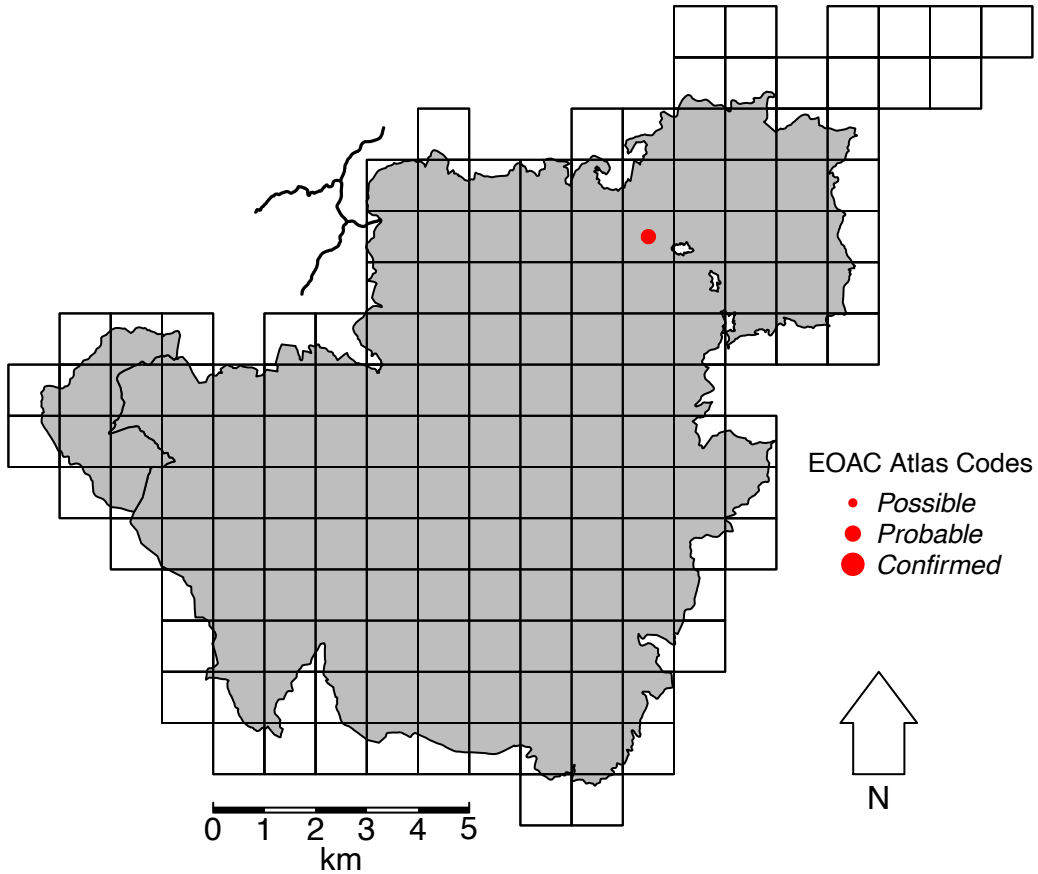

# S atric

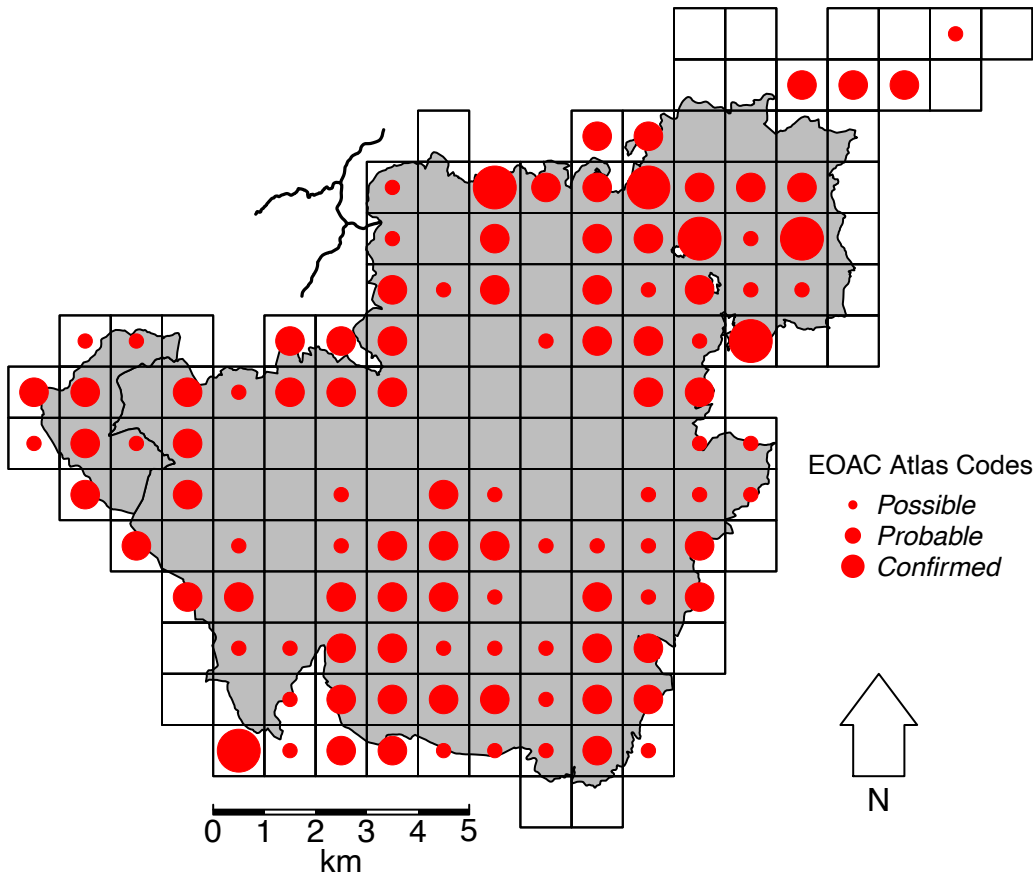

# S borin

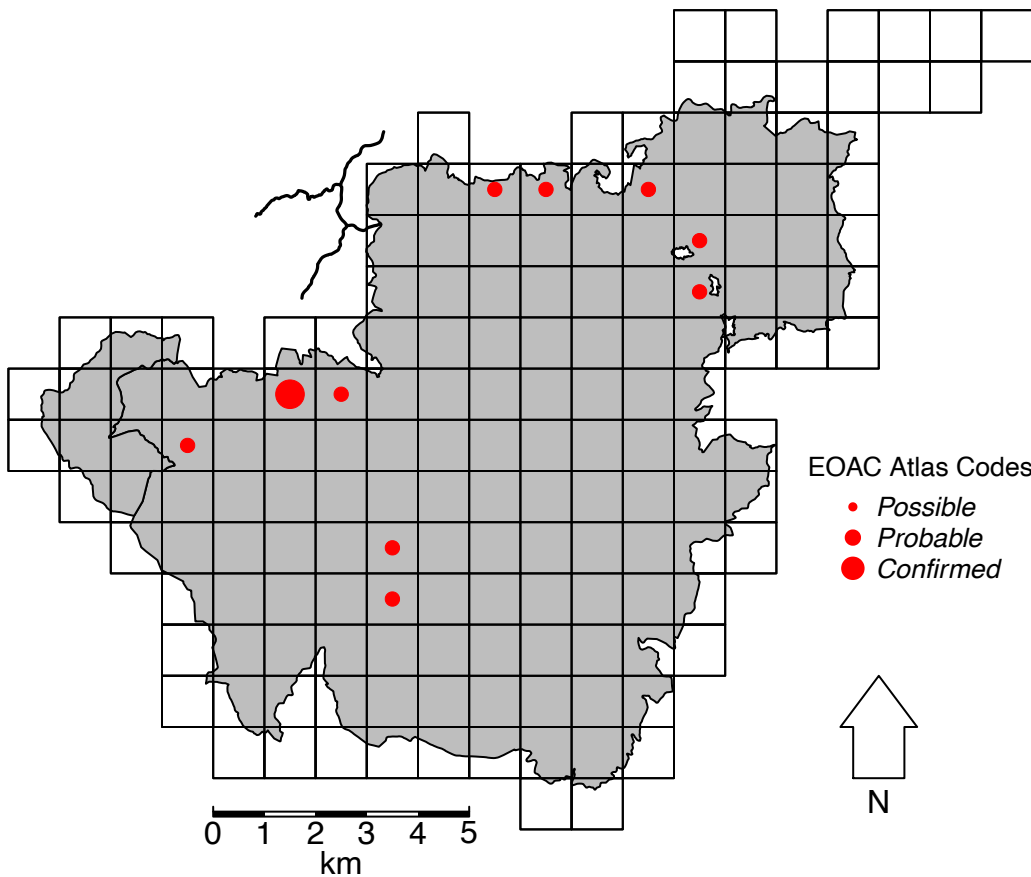

# S cantill

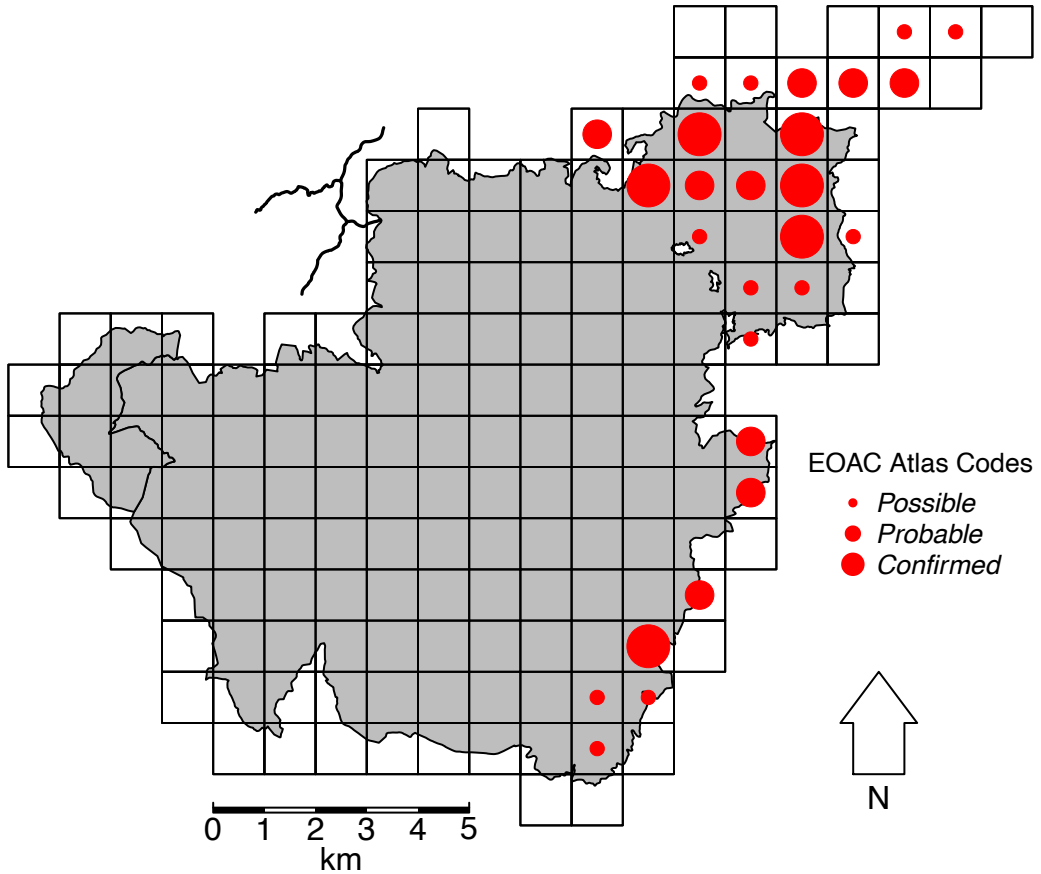

# S com

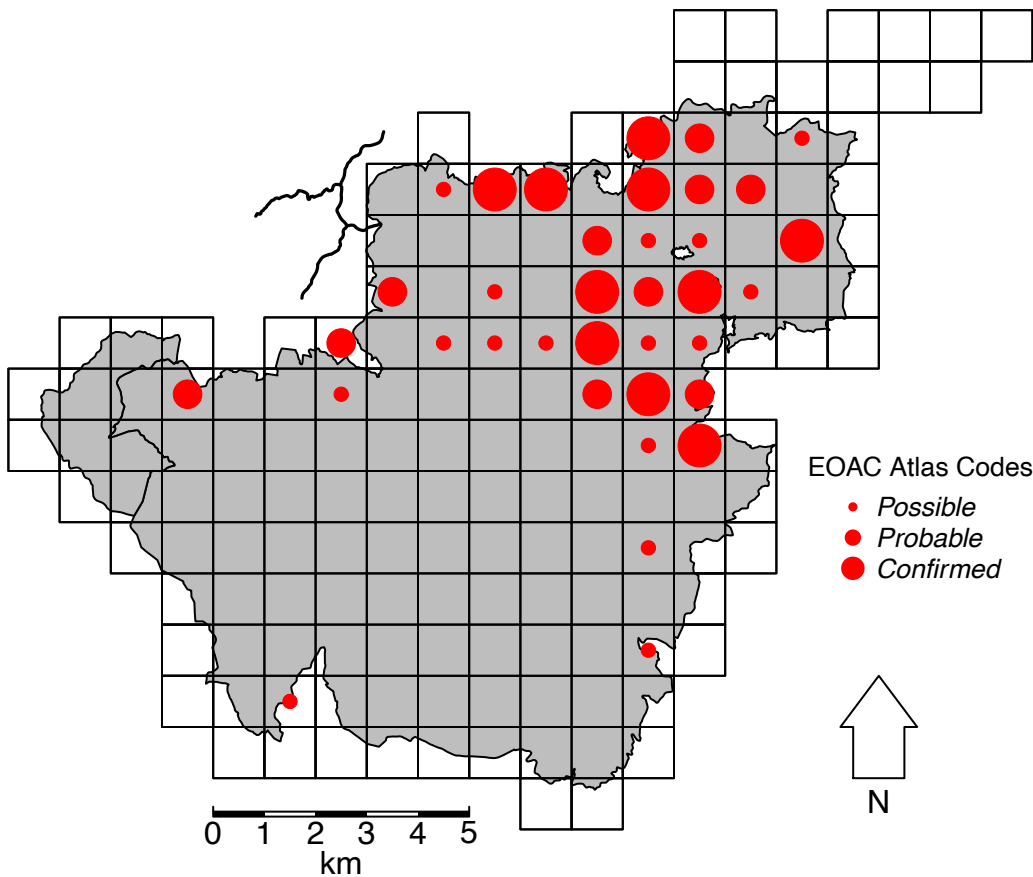

# S europ

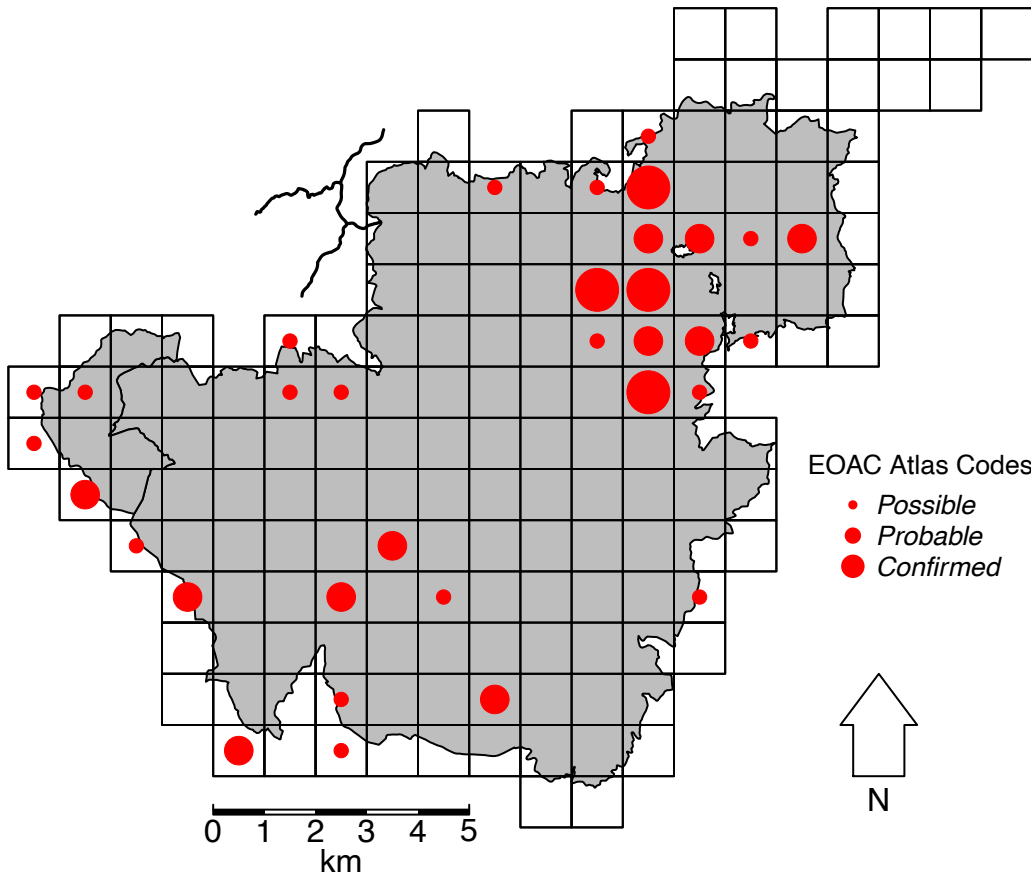

# S melan

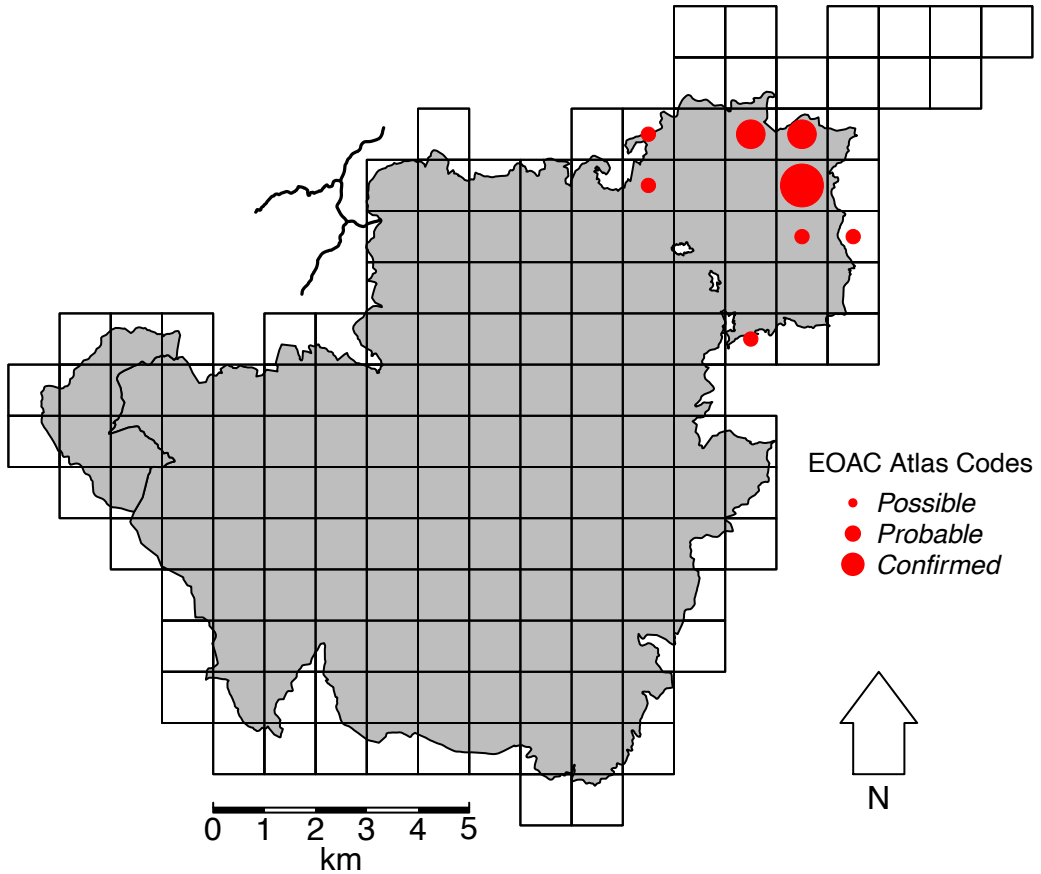

# S rubet

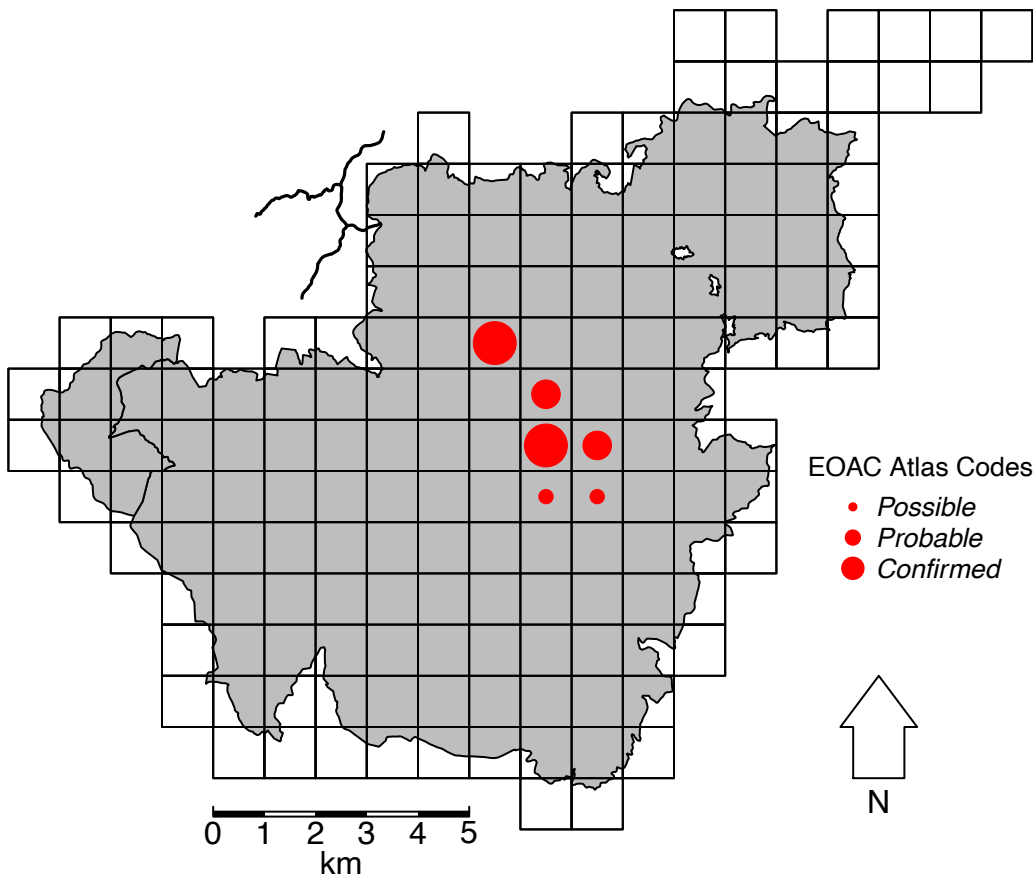

# S ser

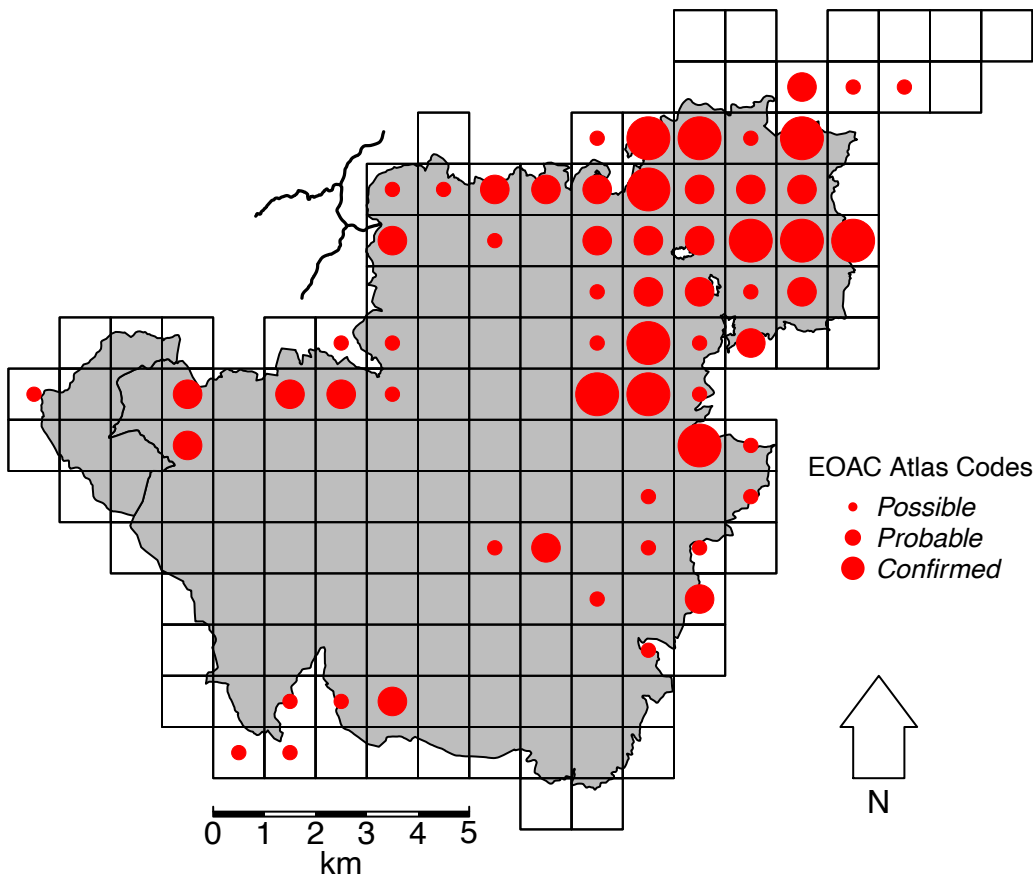

# S torq

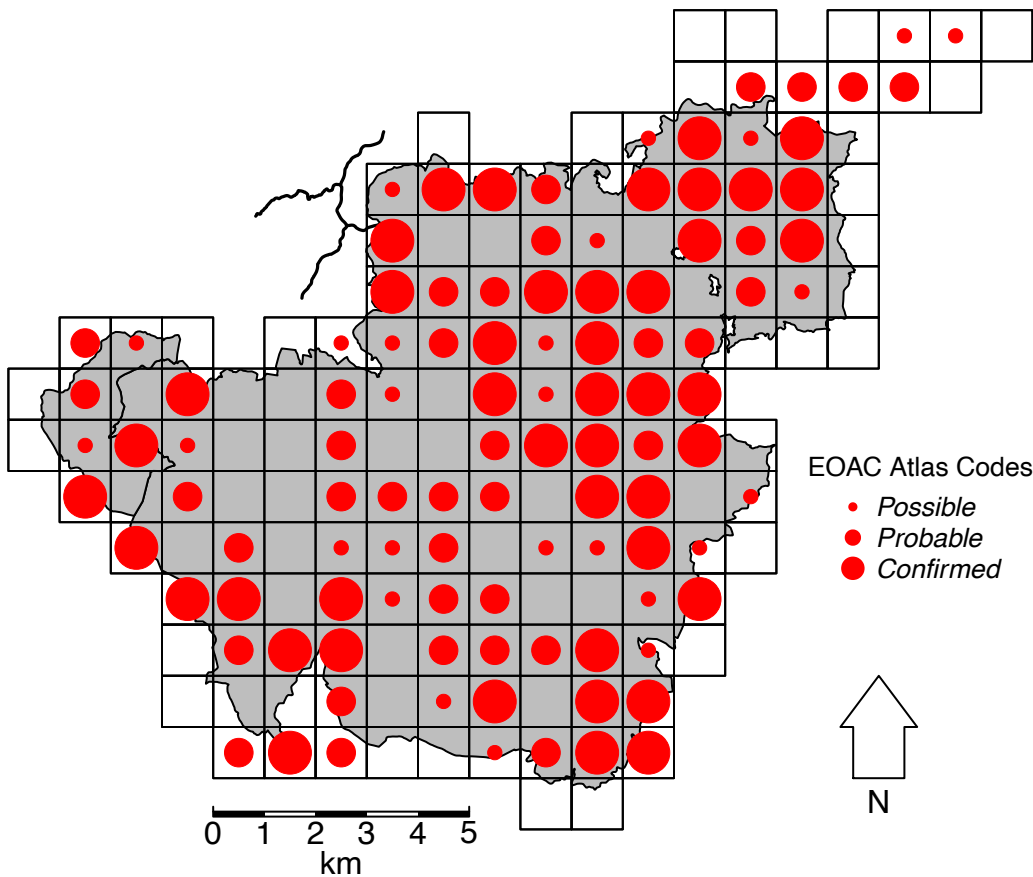

# S turtur

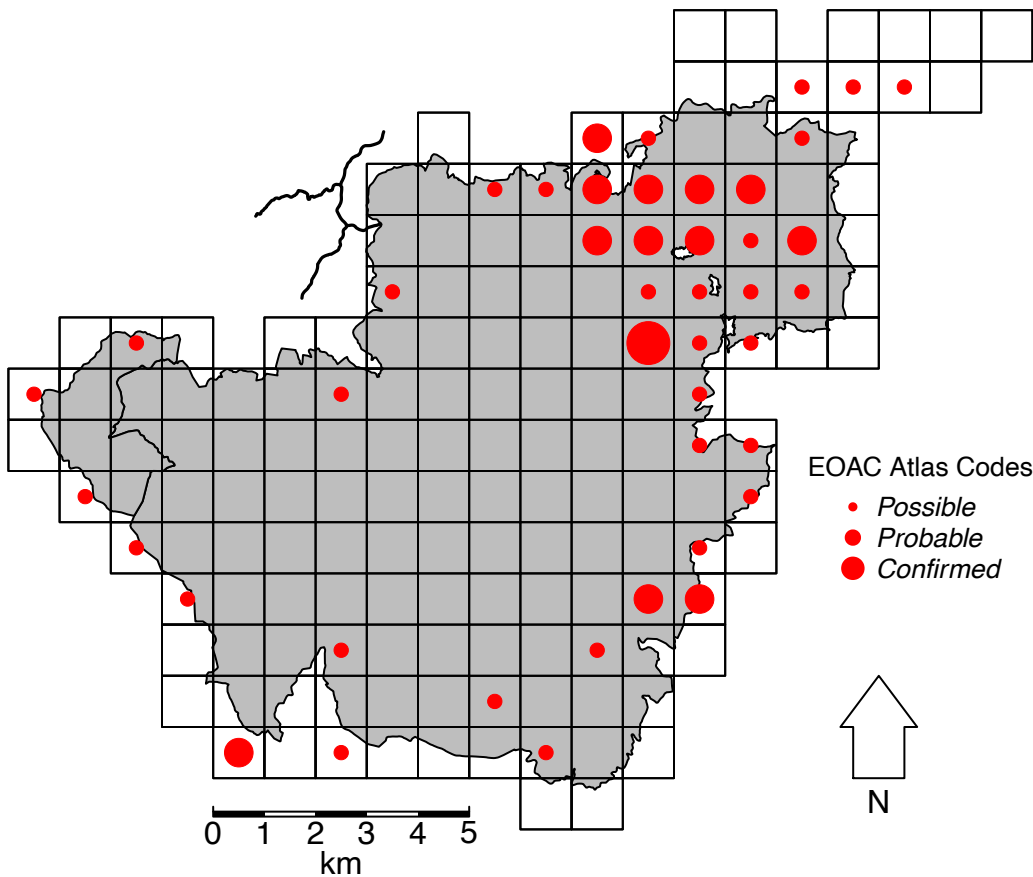

# S undata

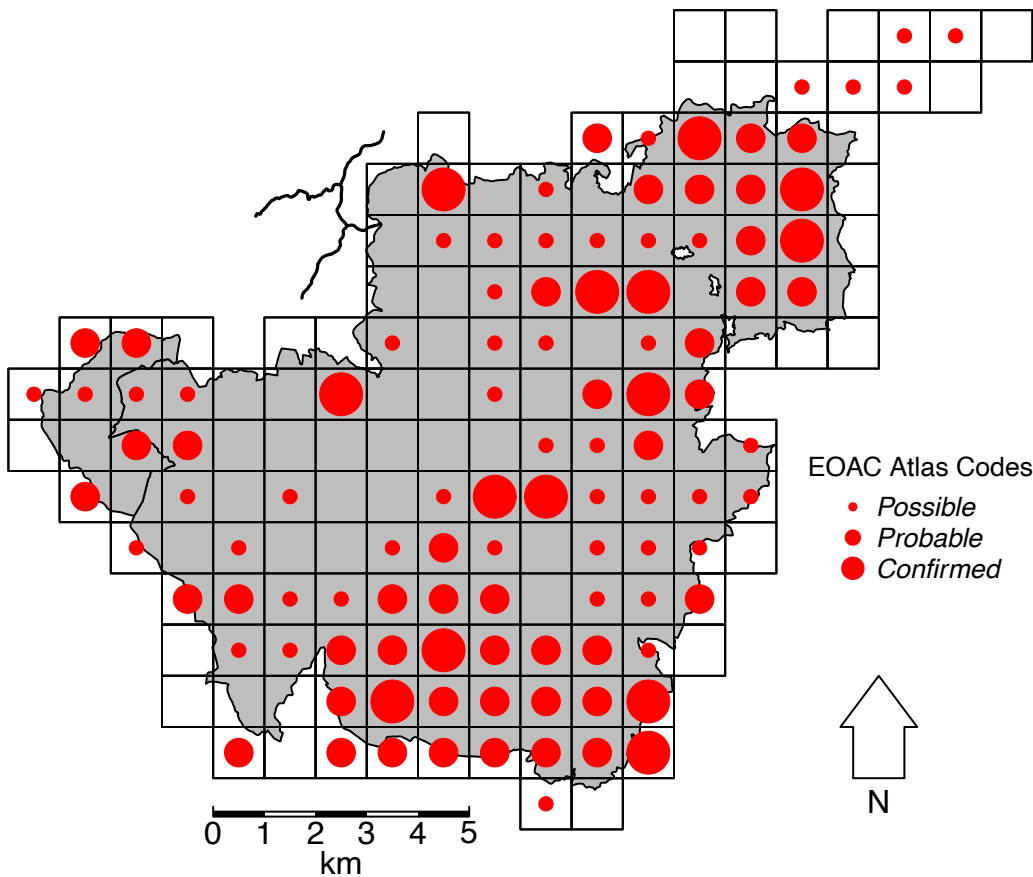

# S unic

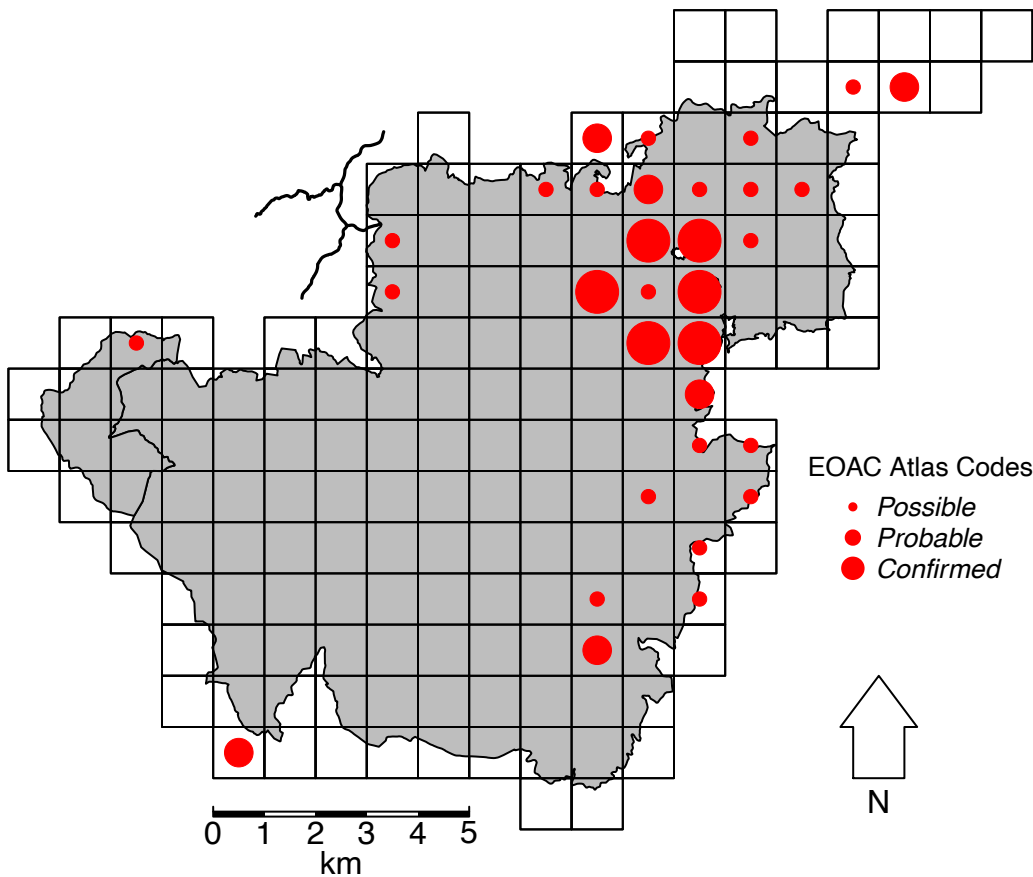

# T mer

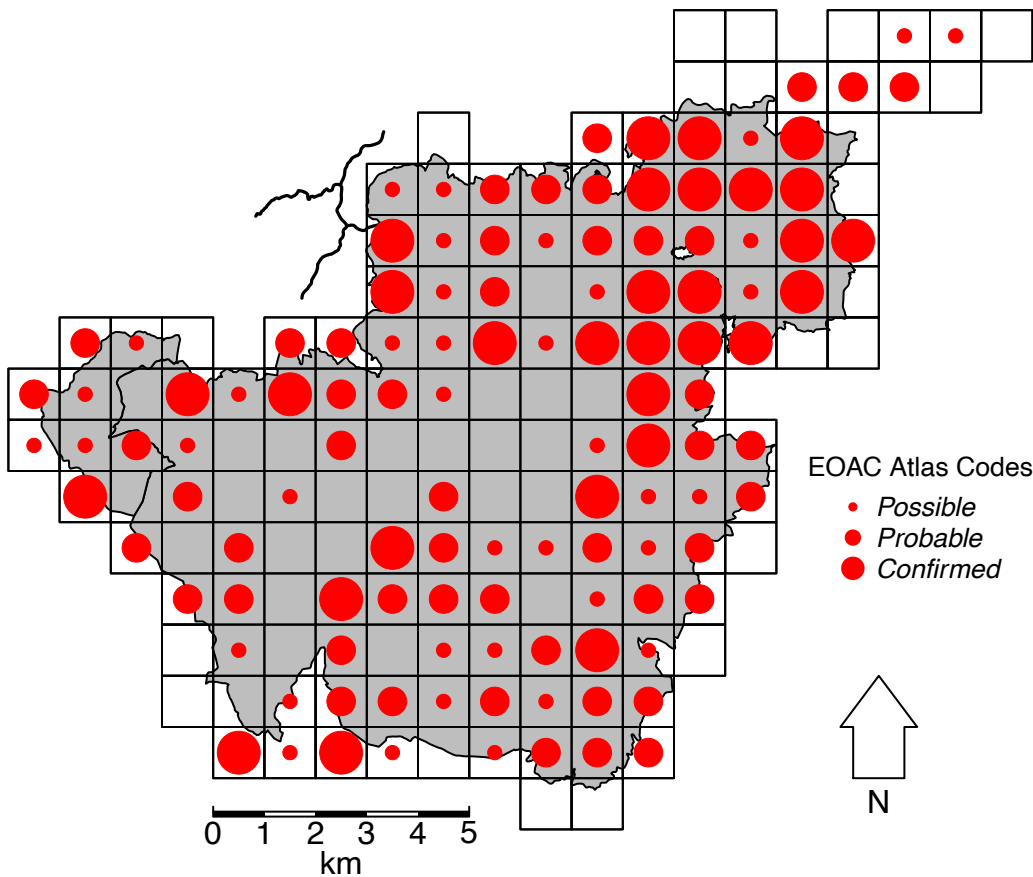

# T philo

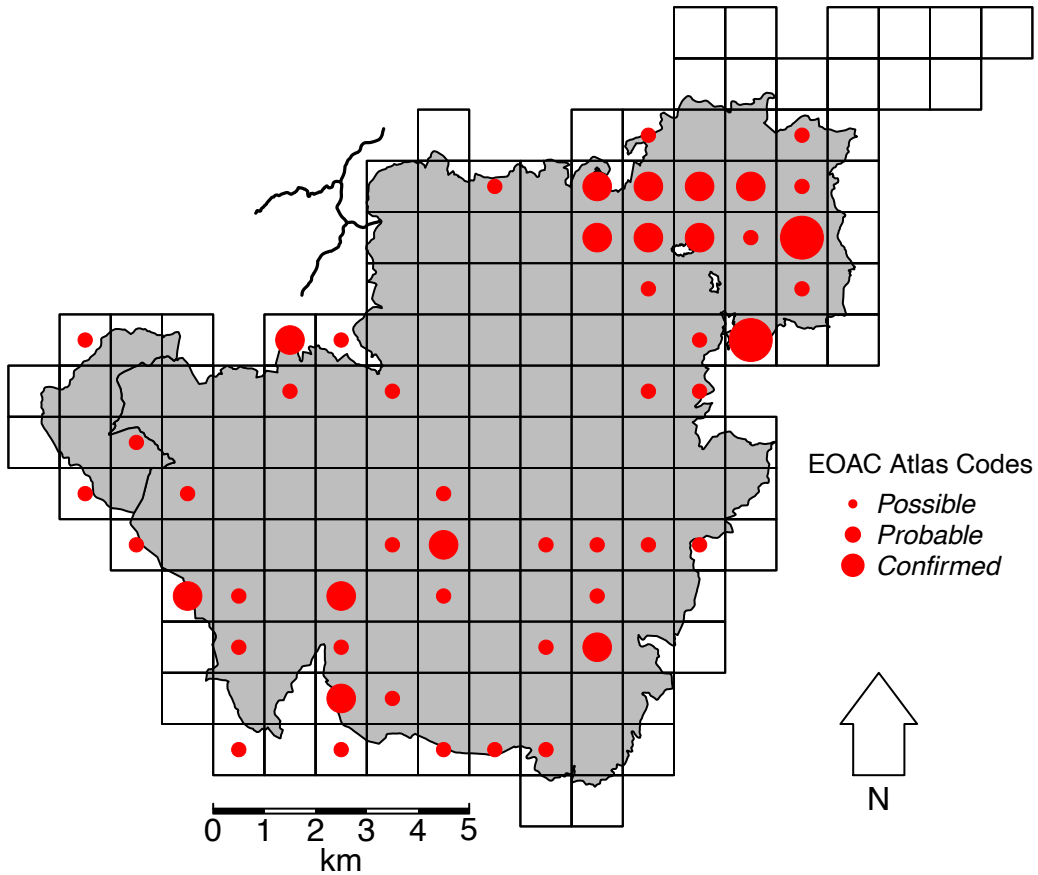

# T trog

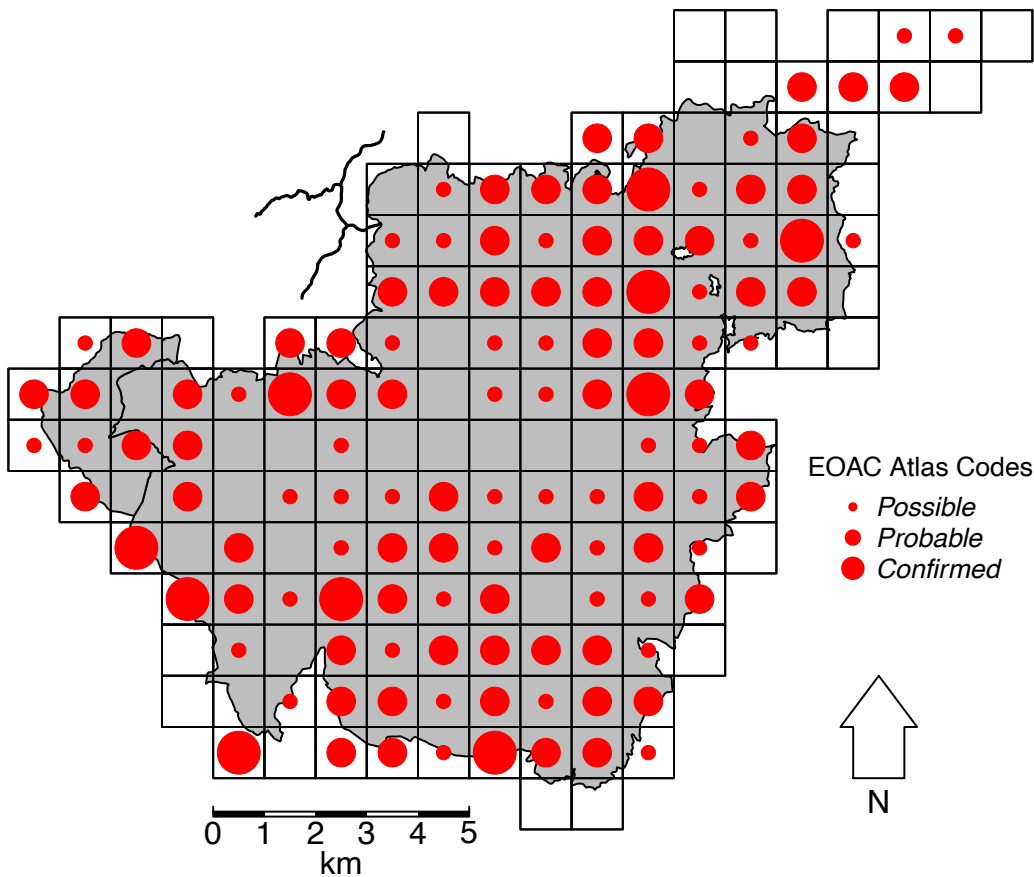

# T visciv

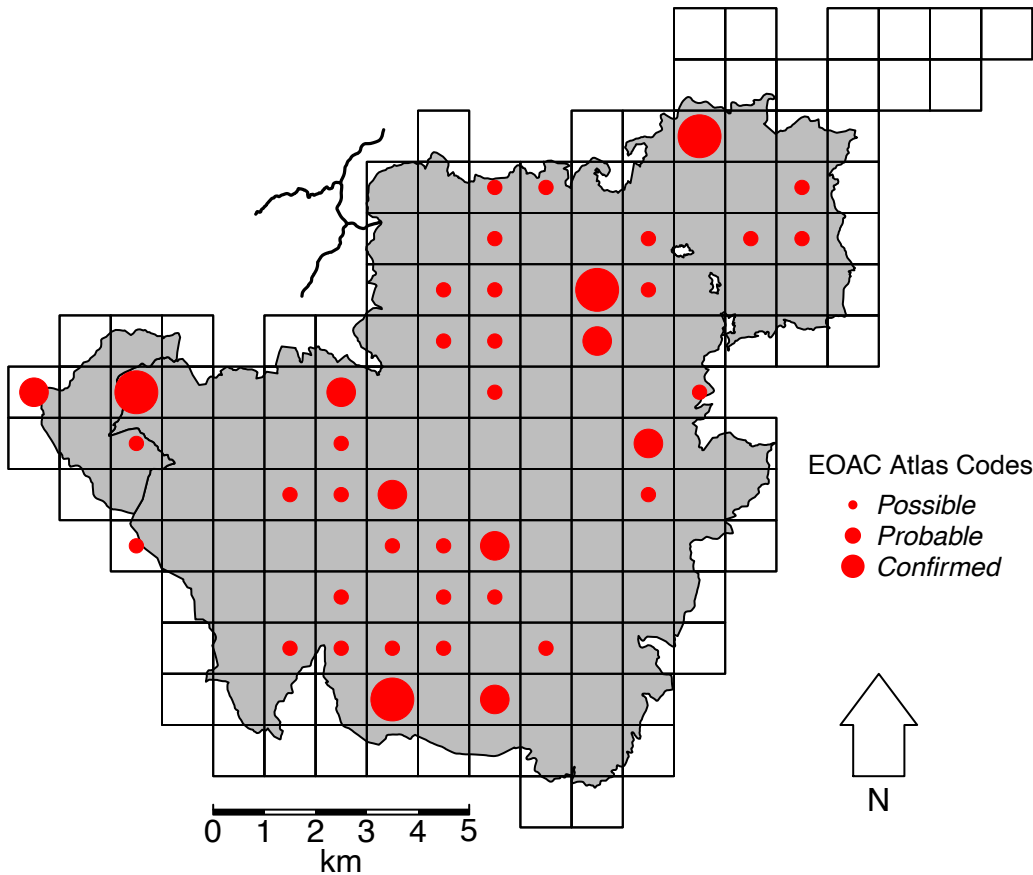

# U epops

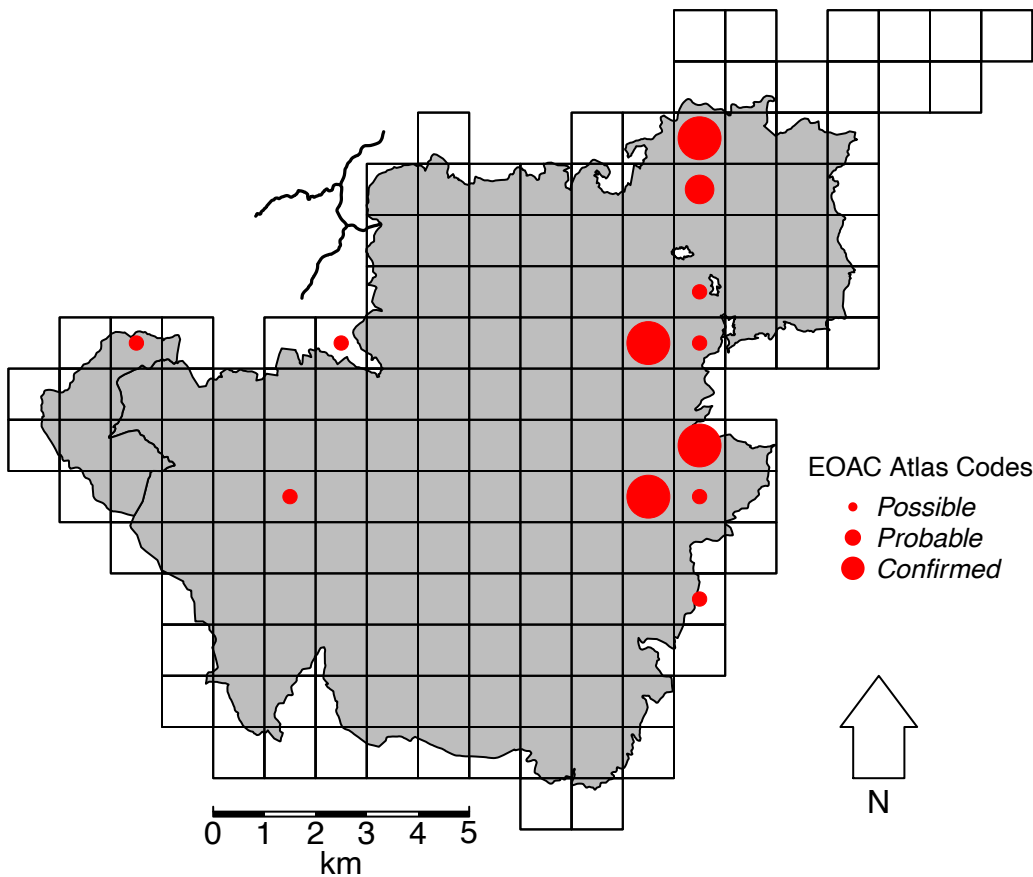

Supplement: s1 [file s1 › Figure_B1.pdf]
