# Supplementary material
Source: MDPI journal article supplement (https://www.mdpi.com/2072-4292/12/16/2549)

# Aapus

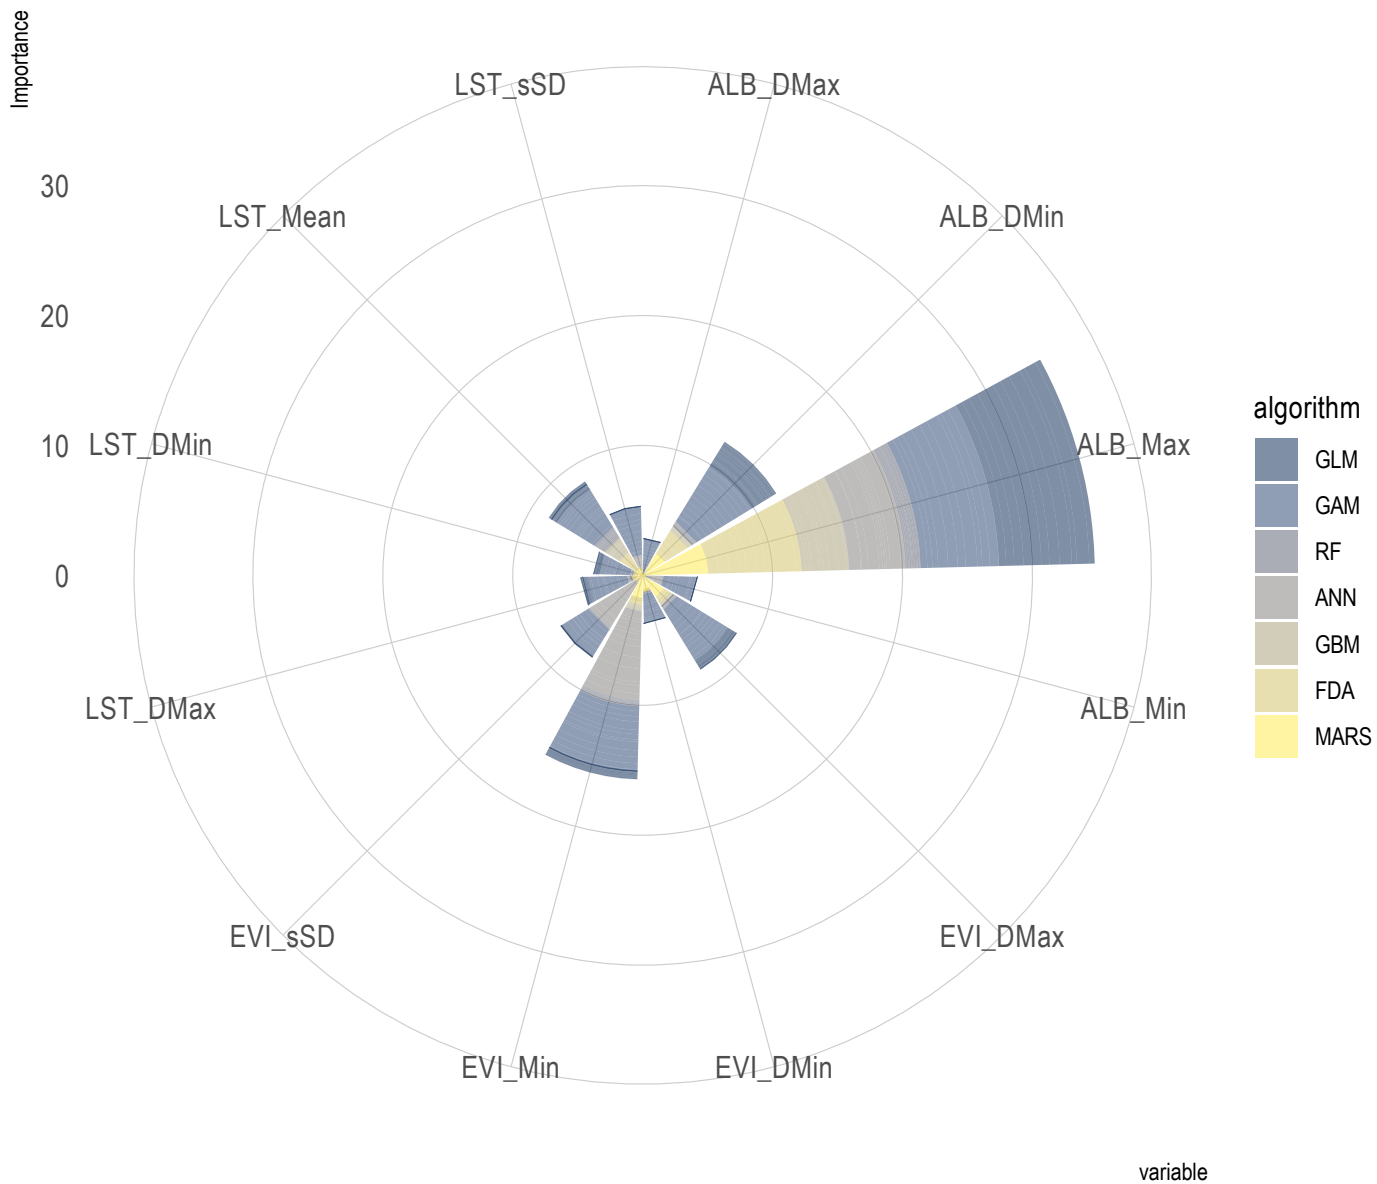

# Aarven

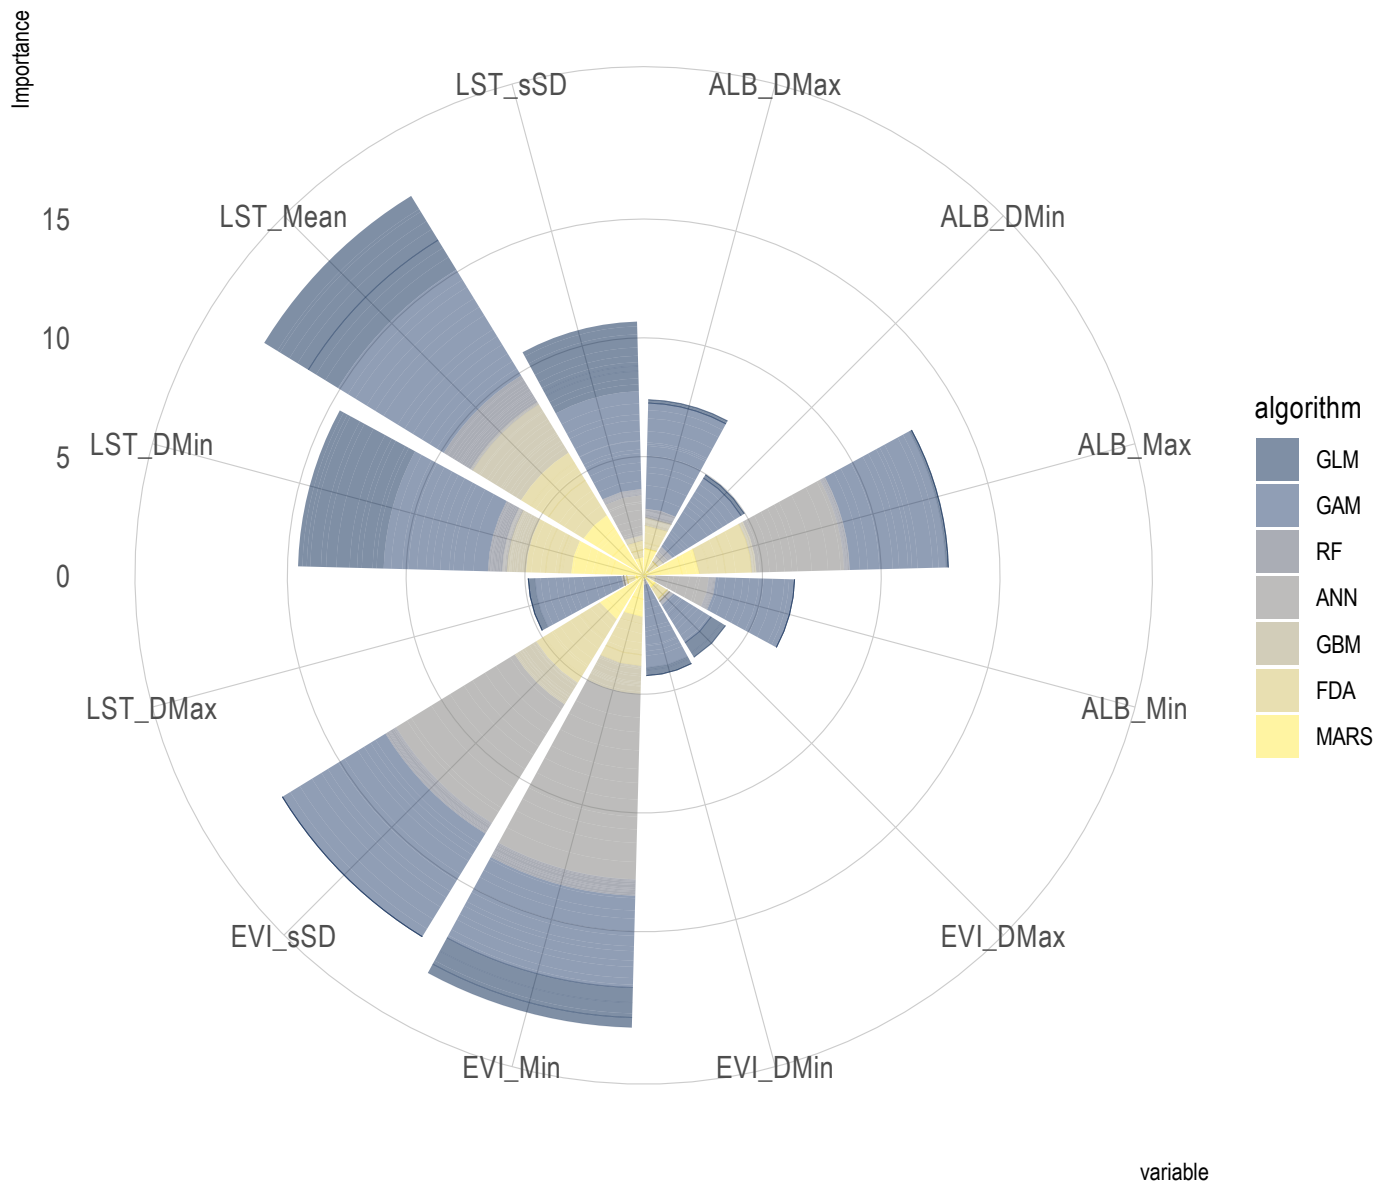

# Acaud

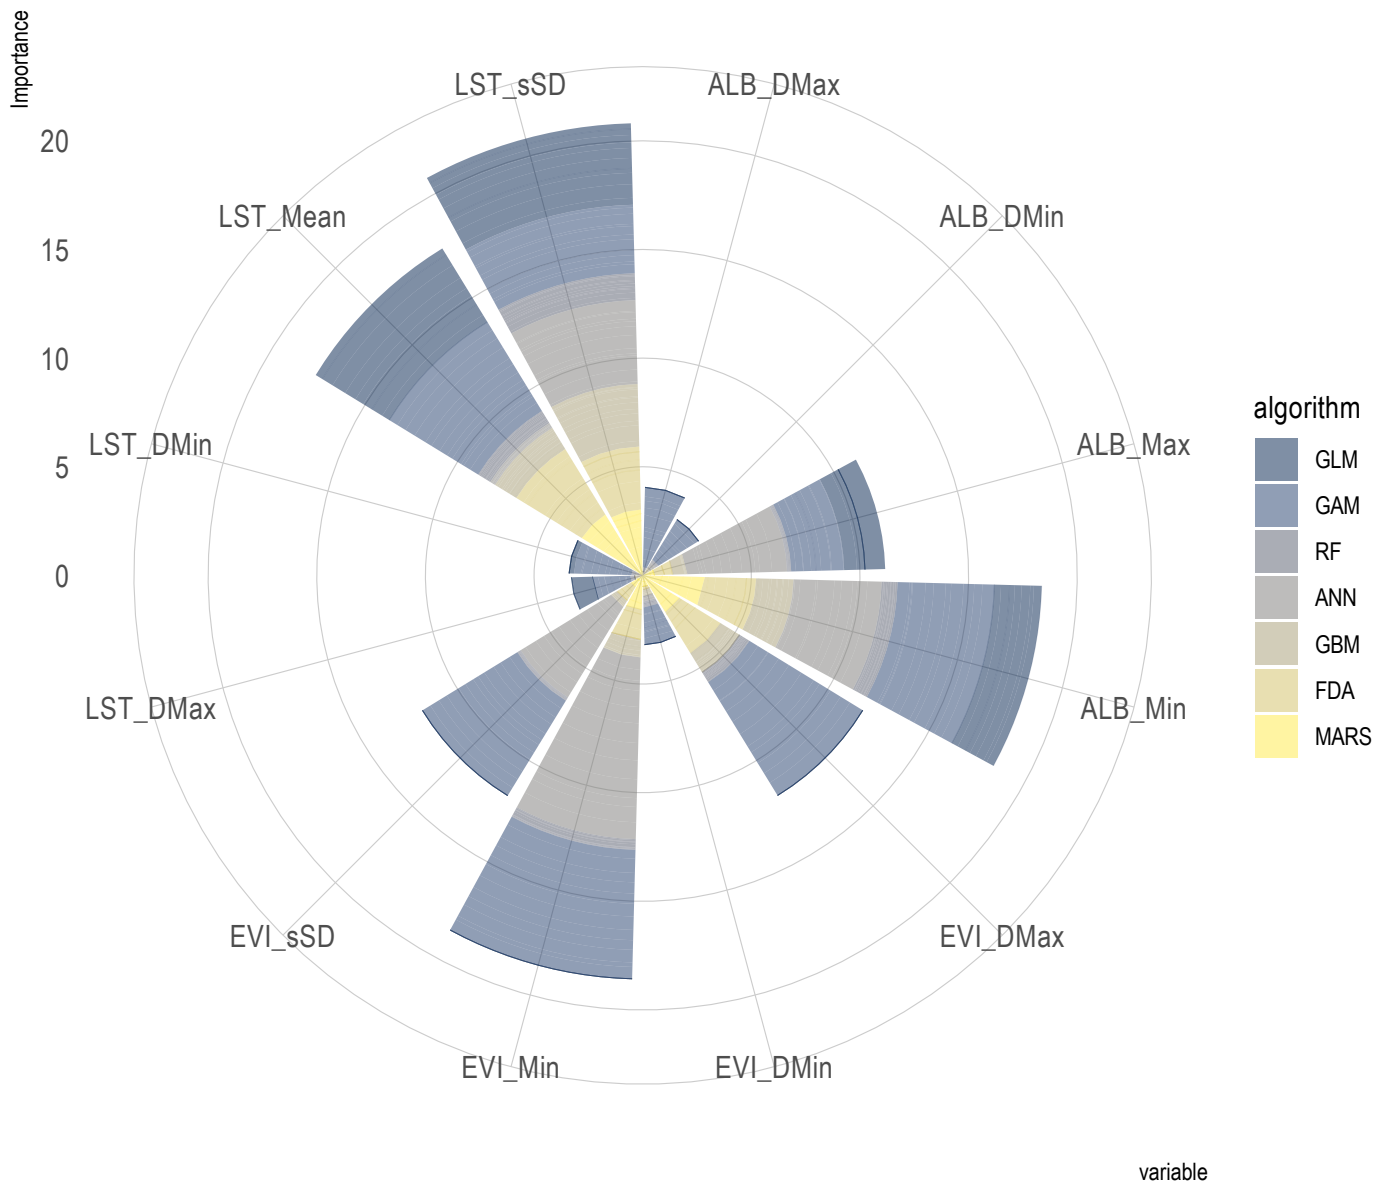

# Accipgen

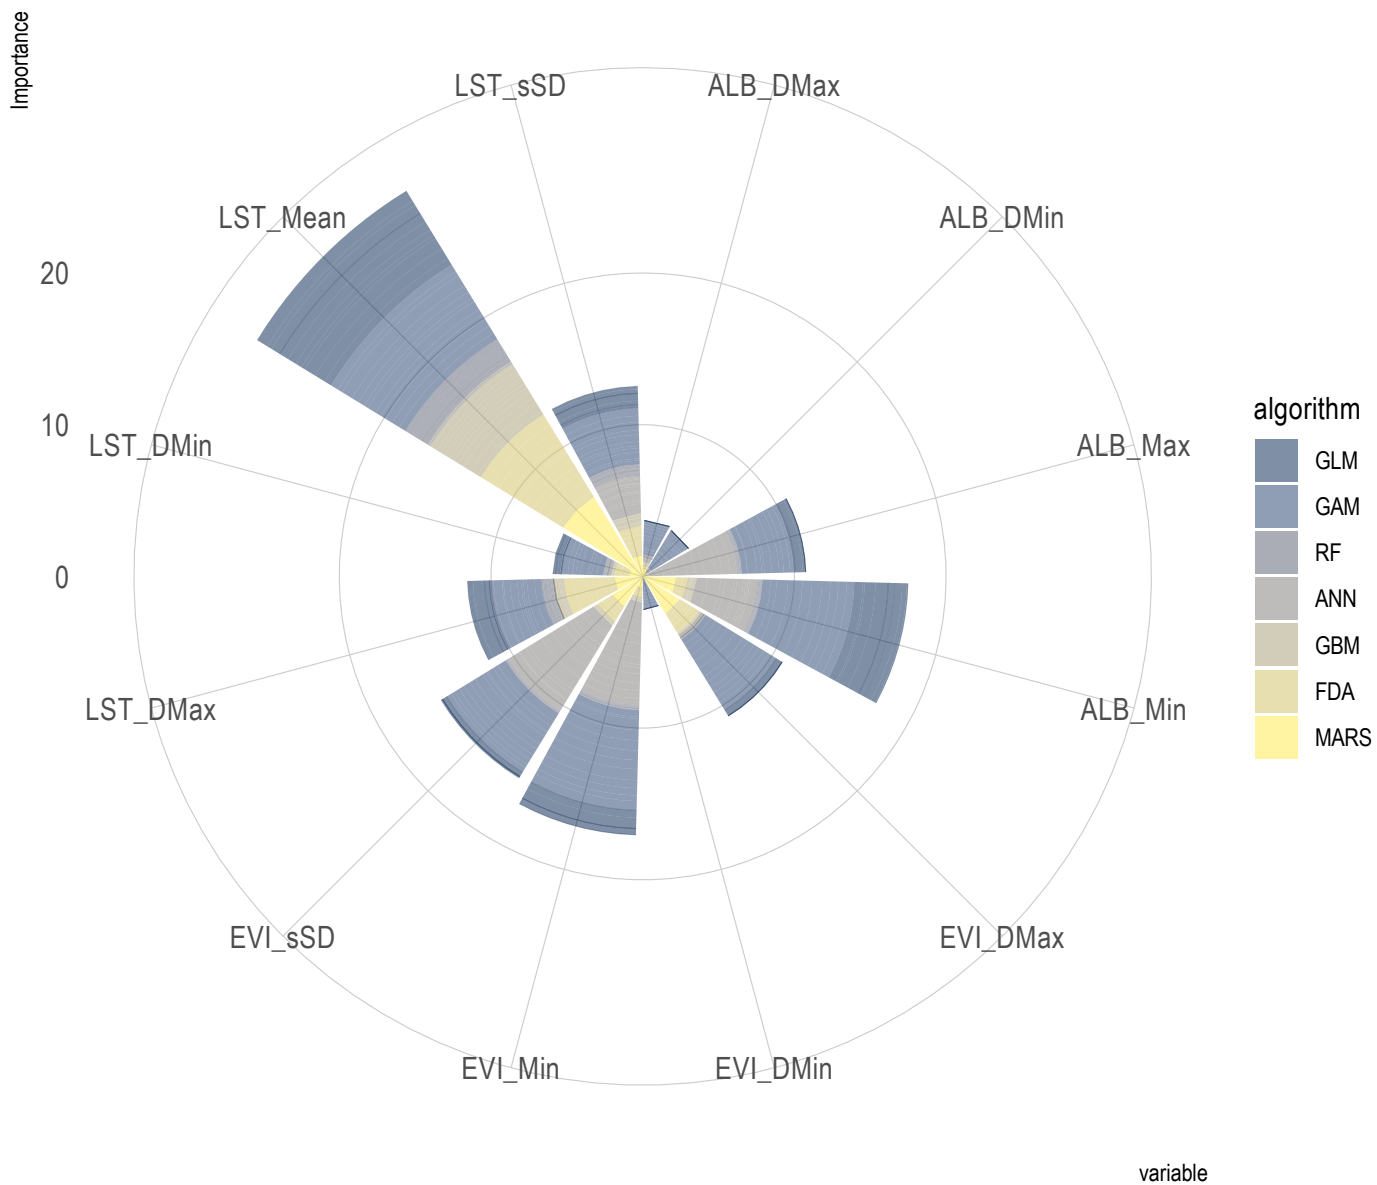

# Accipnis

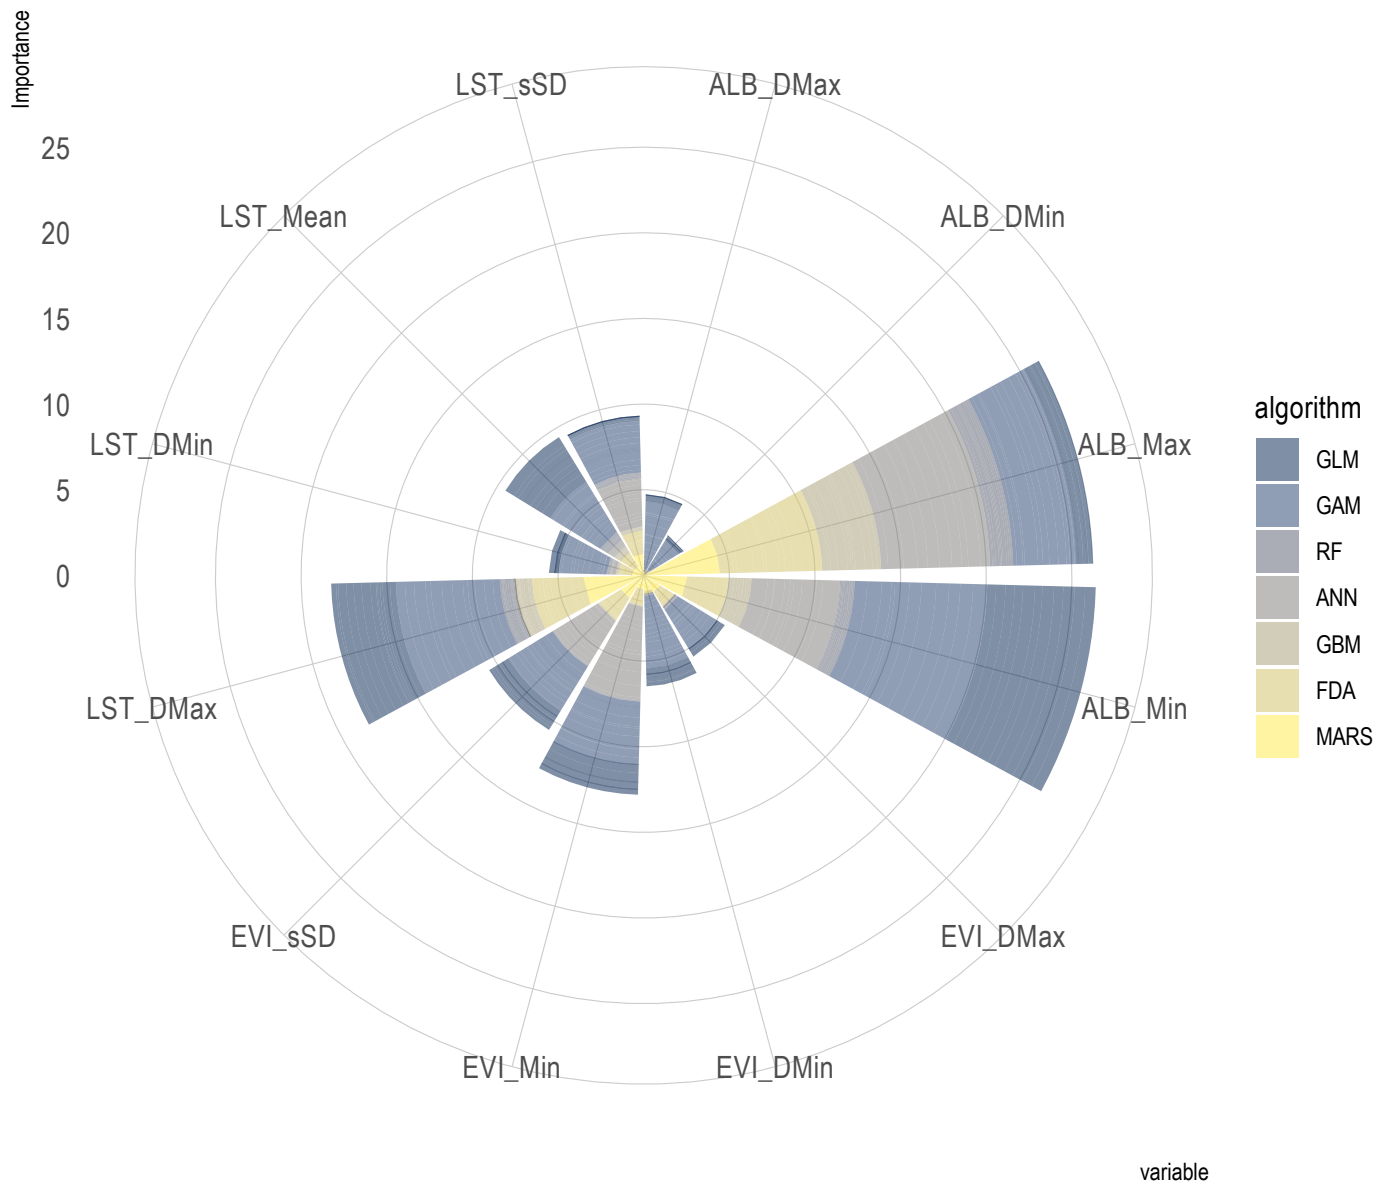

# Antcamp

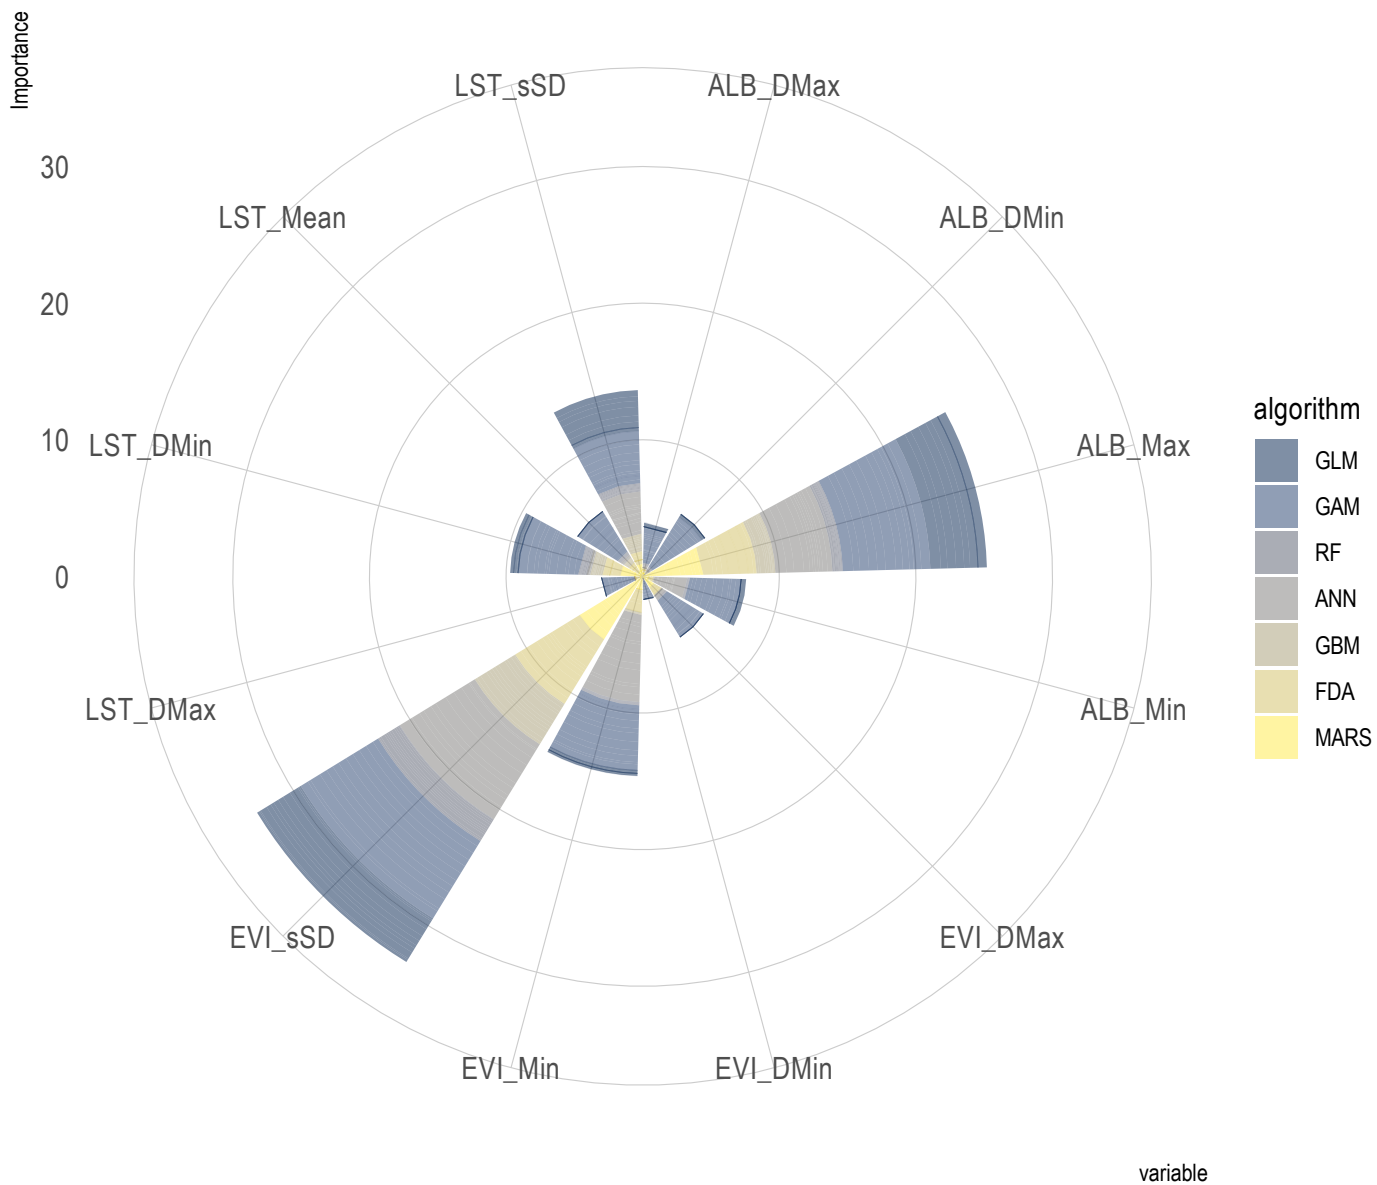

# Antspino

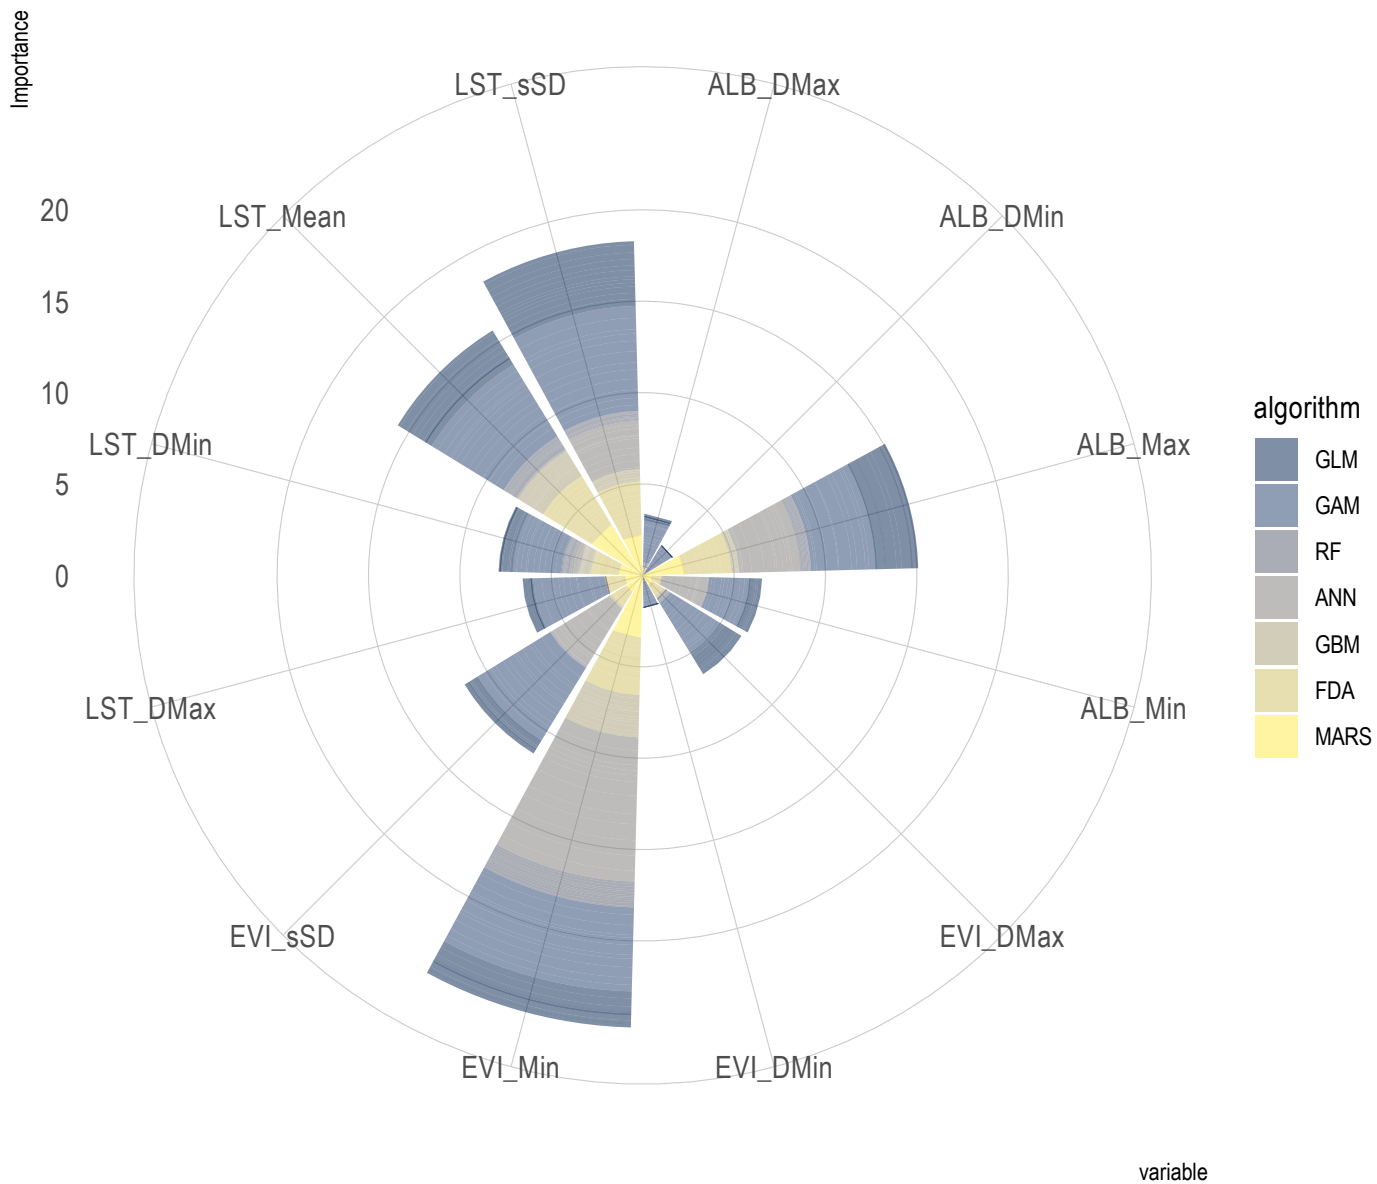

# Anttriv

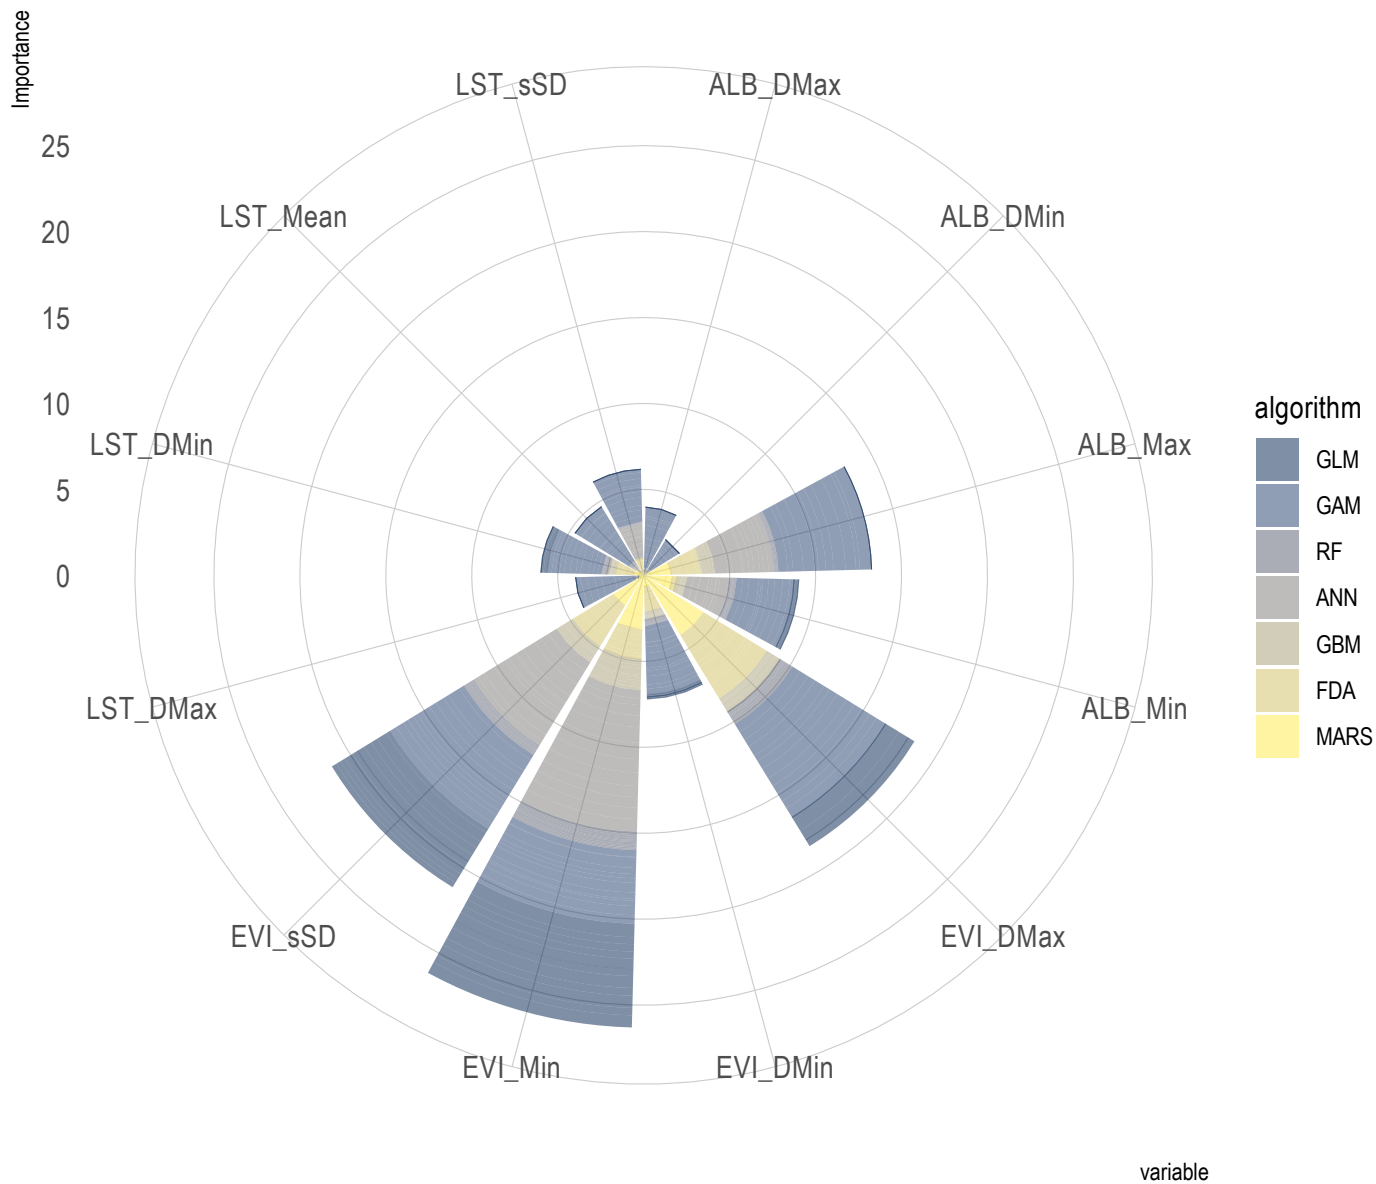

# Arufa

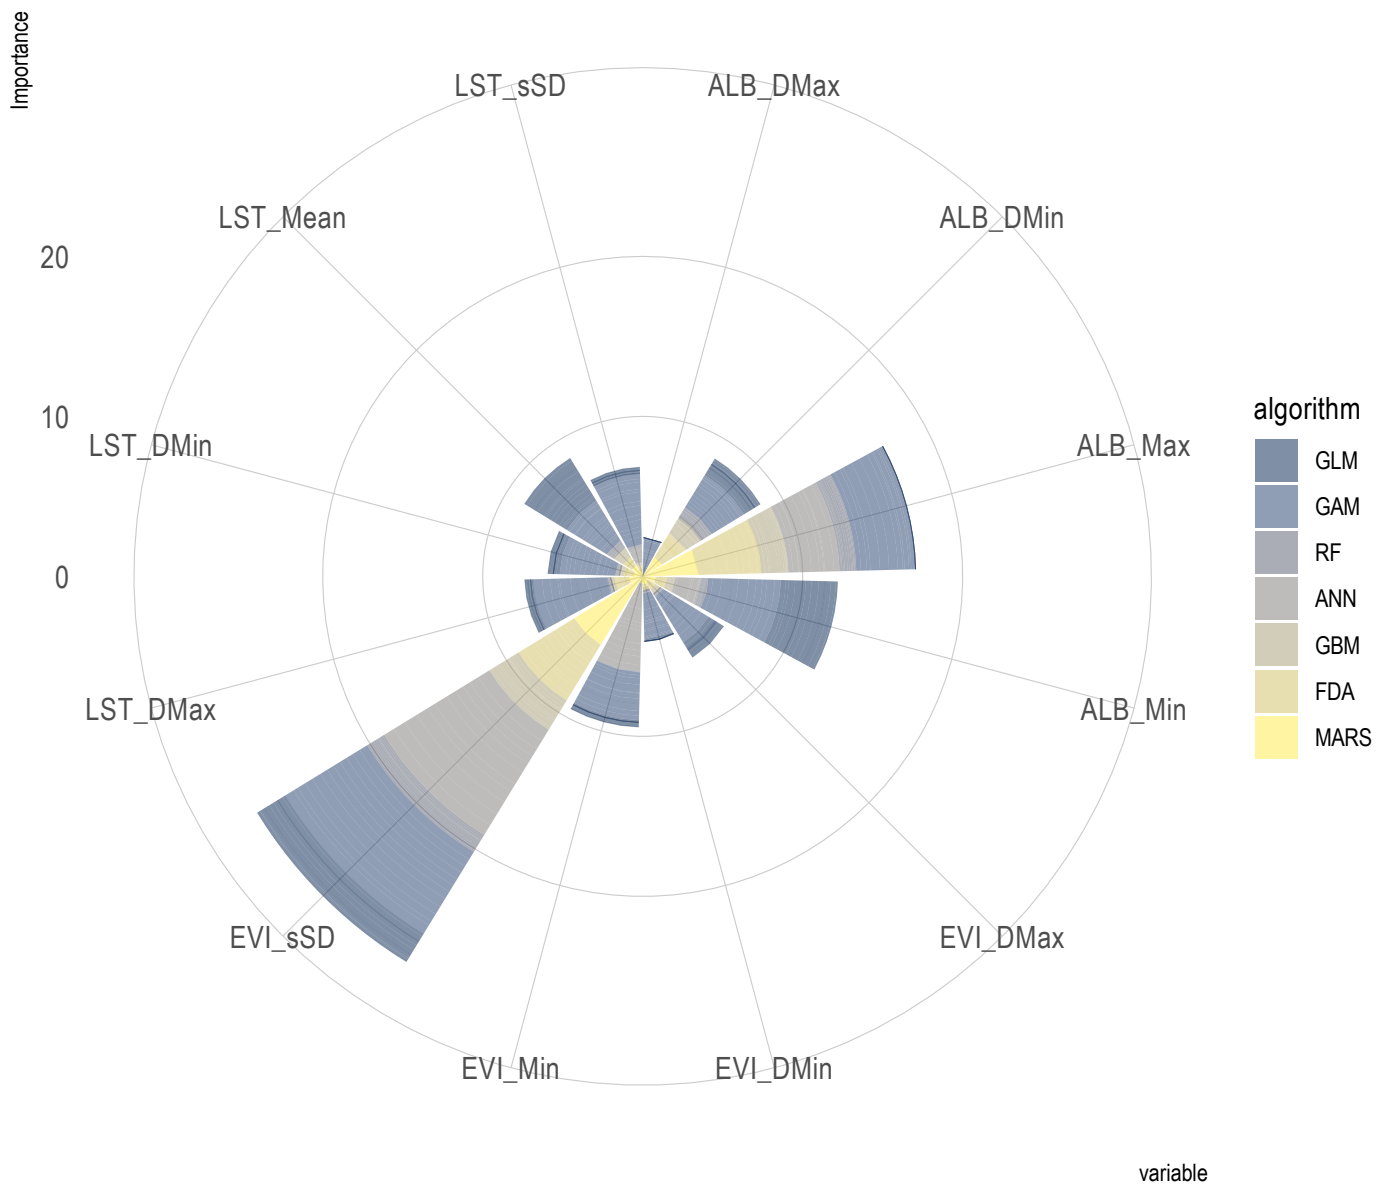

# Cbrach

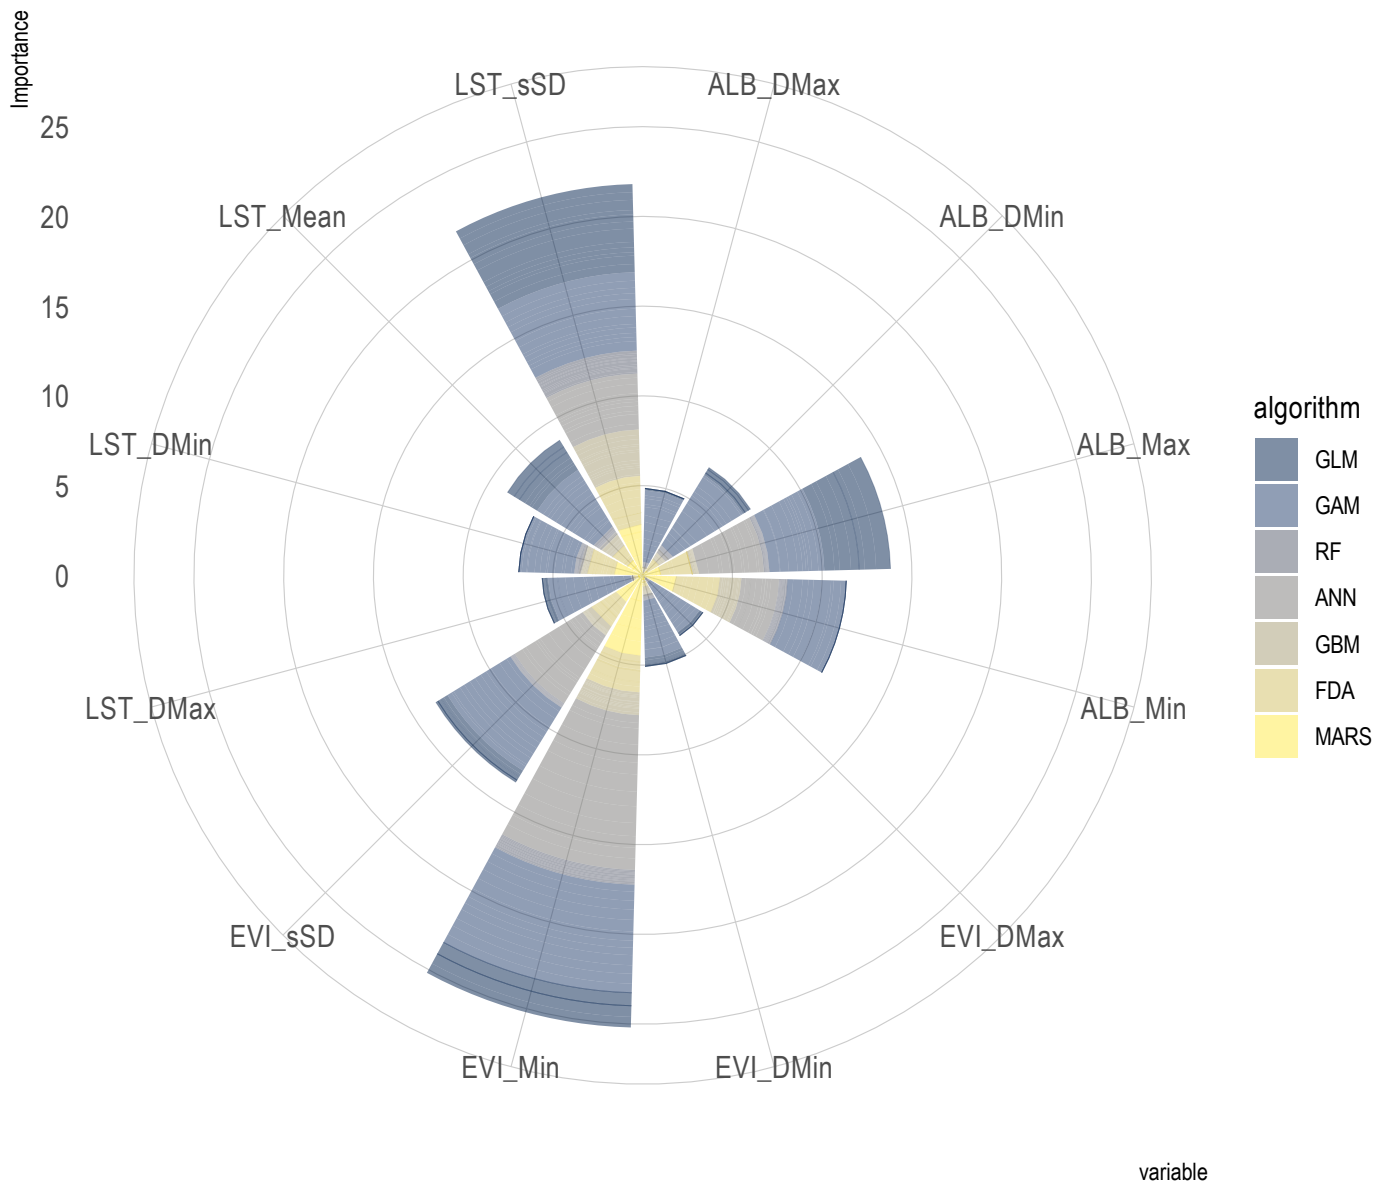

# Ccann

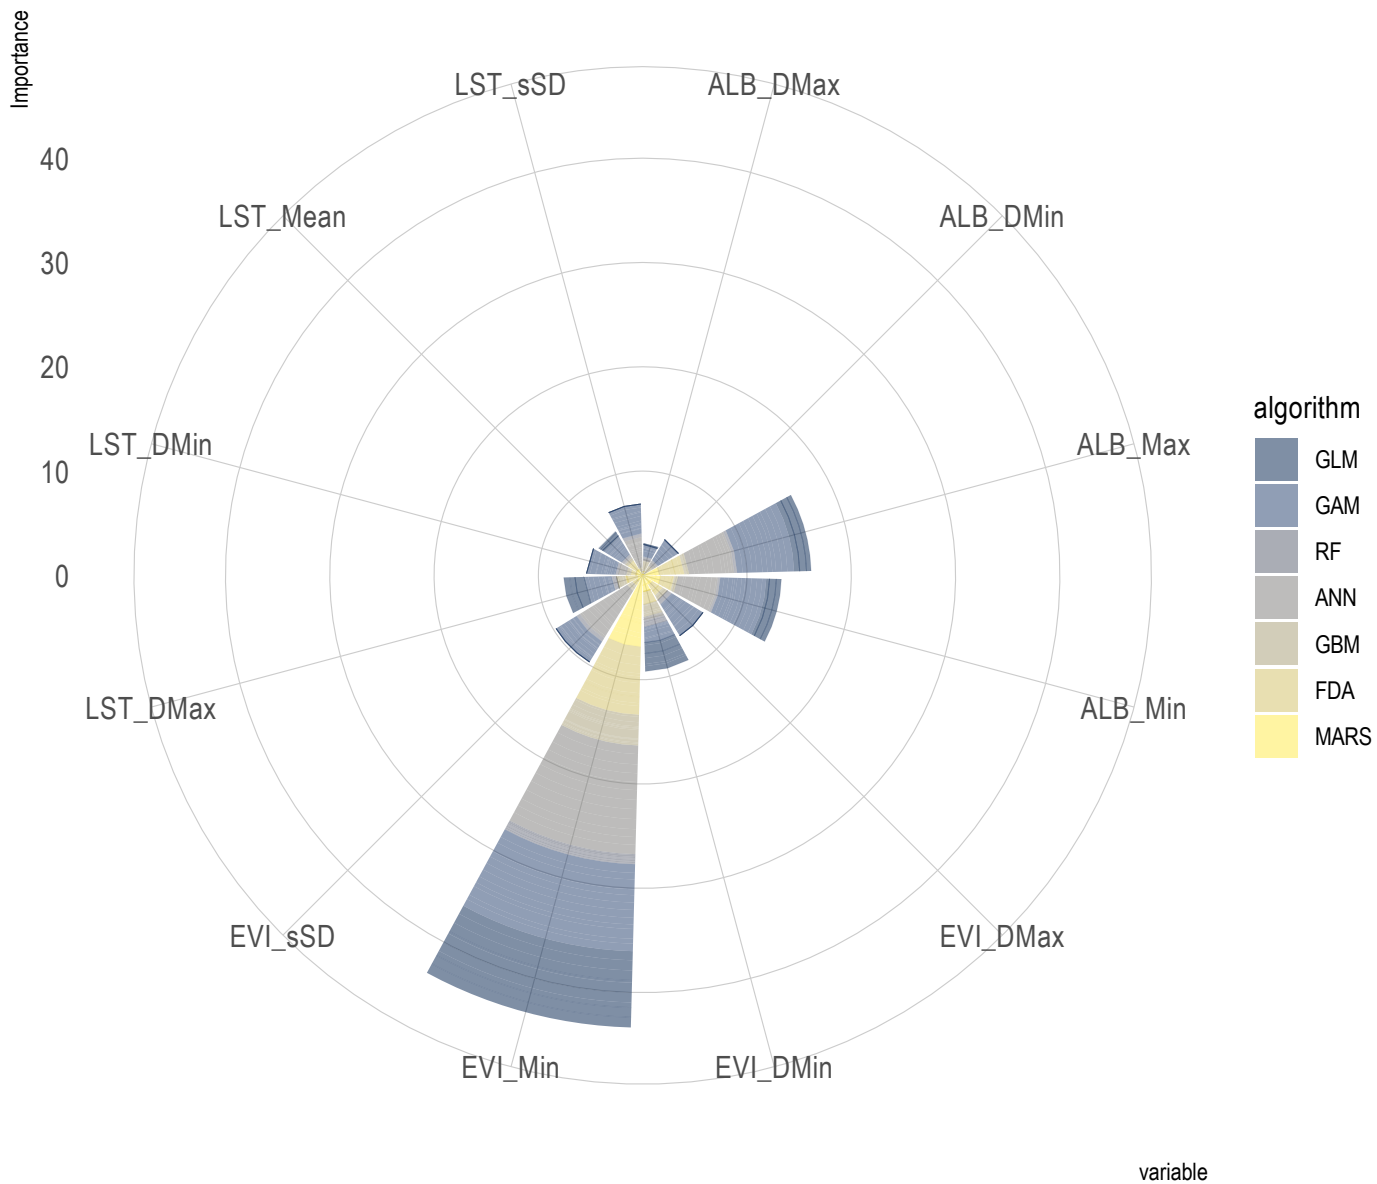

# Ccanor

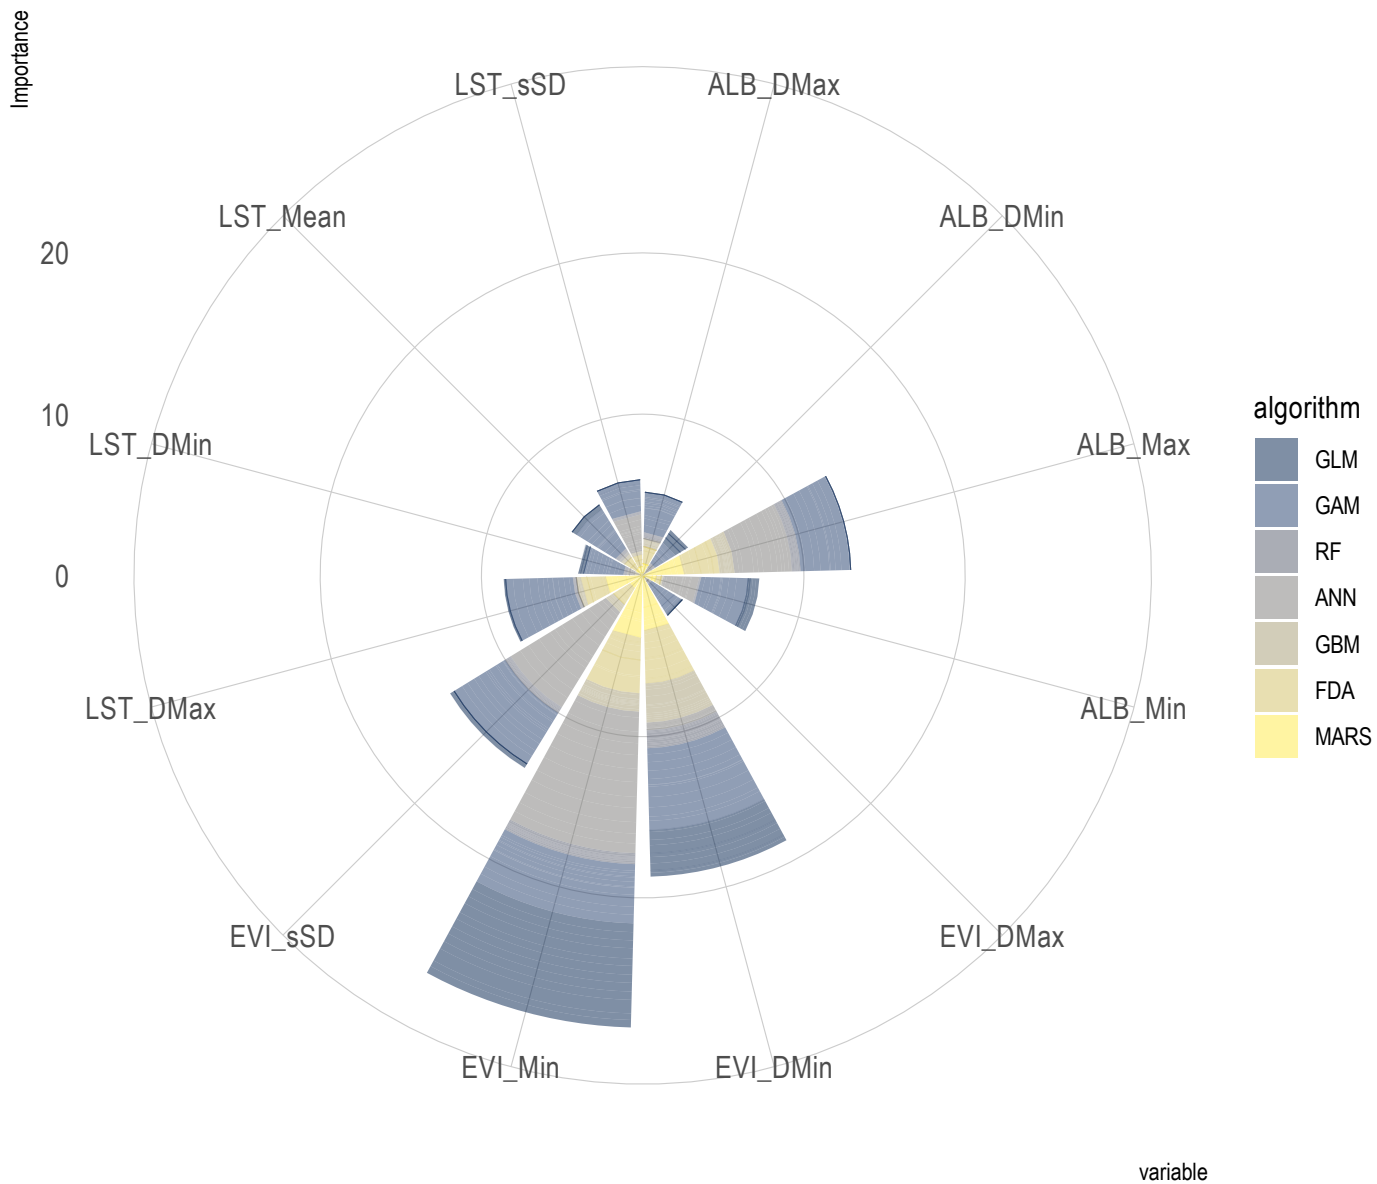

# Ccard

Importance

15

10

5

0

LST\_sSD

ALB\_DMax

ALB\_DMin

ALB\_Max

ALB\_Min

EVI\_DMax

EVI\_DMin

EVI\_Min

EVI\_sSD

LST\_DMax

LST\_DMin

LST\_Mean

algorithm

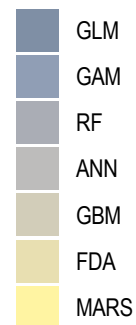

variable

# Cchlor

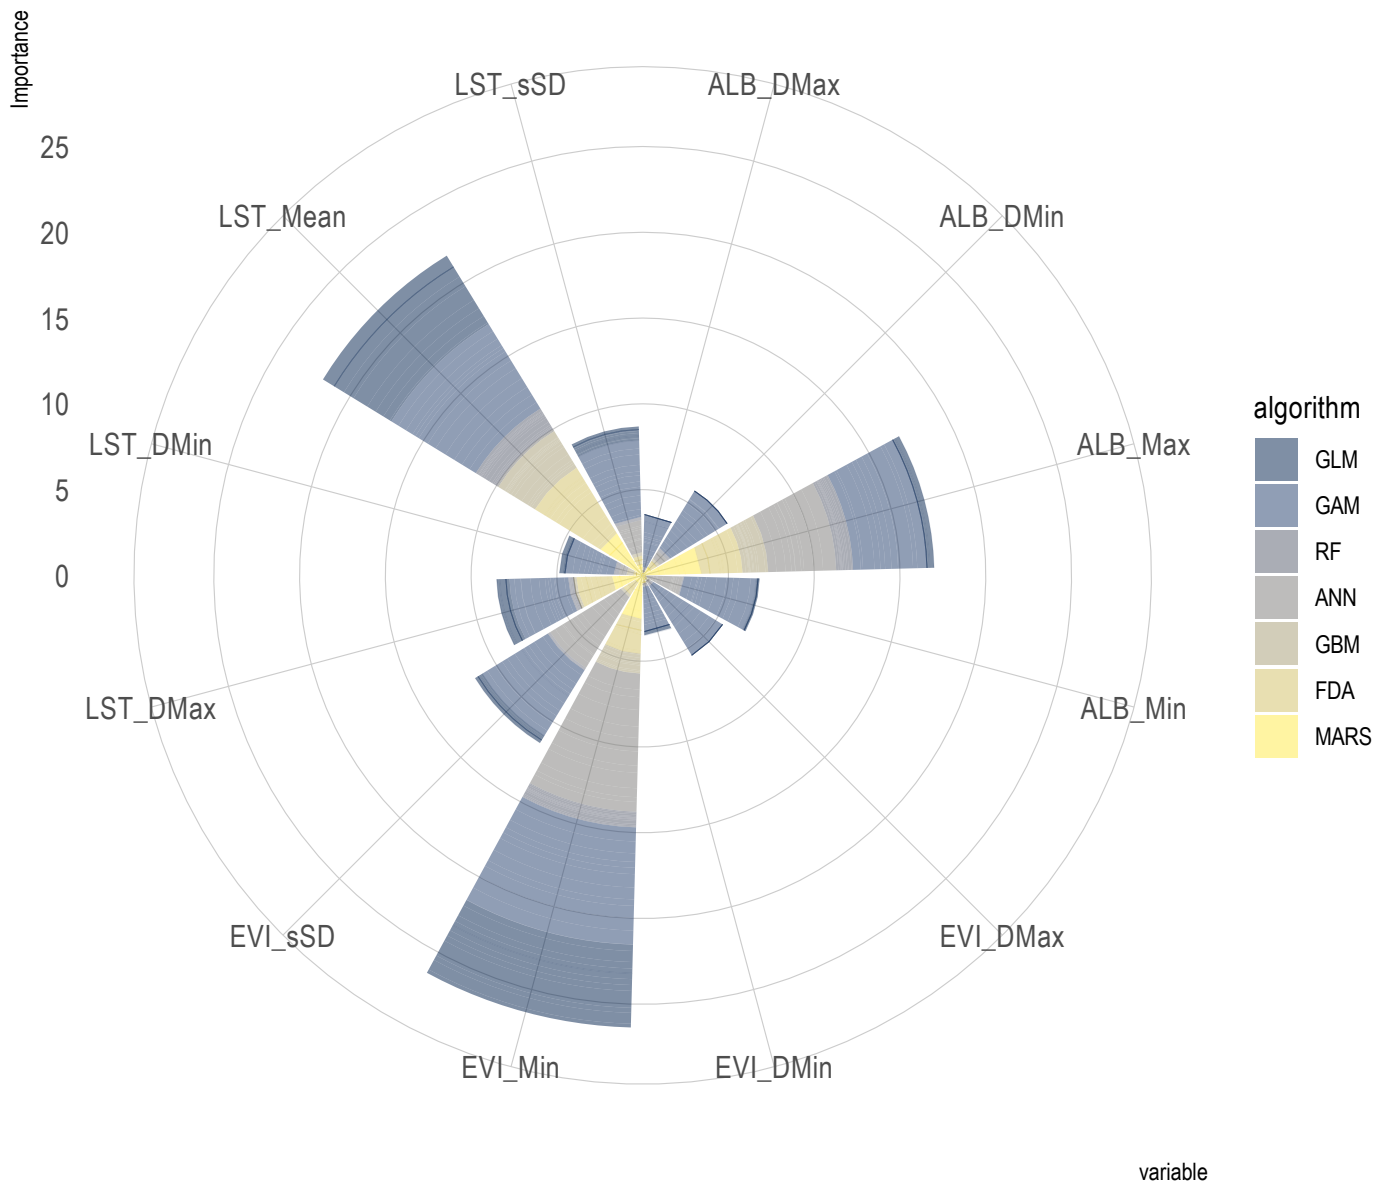

# Ccorax

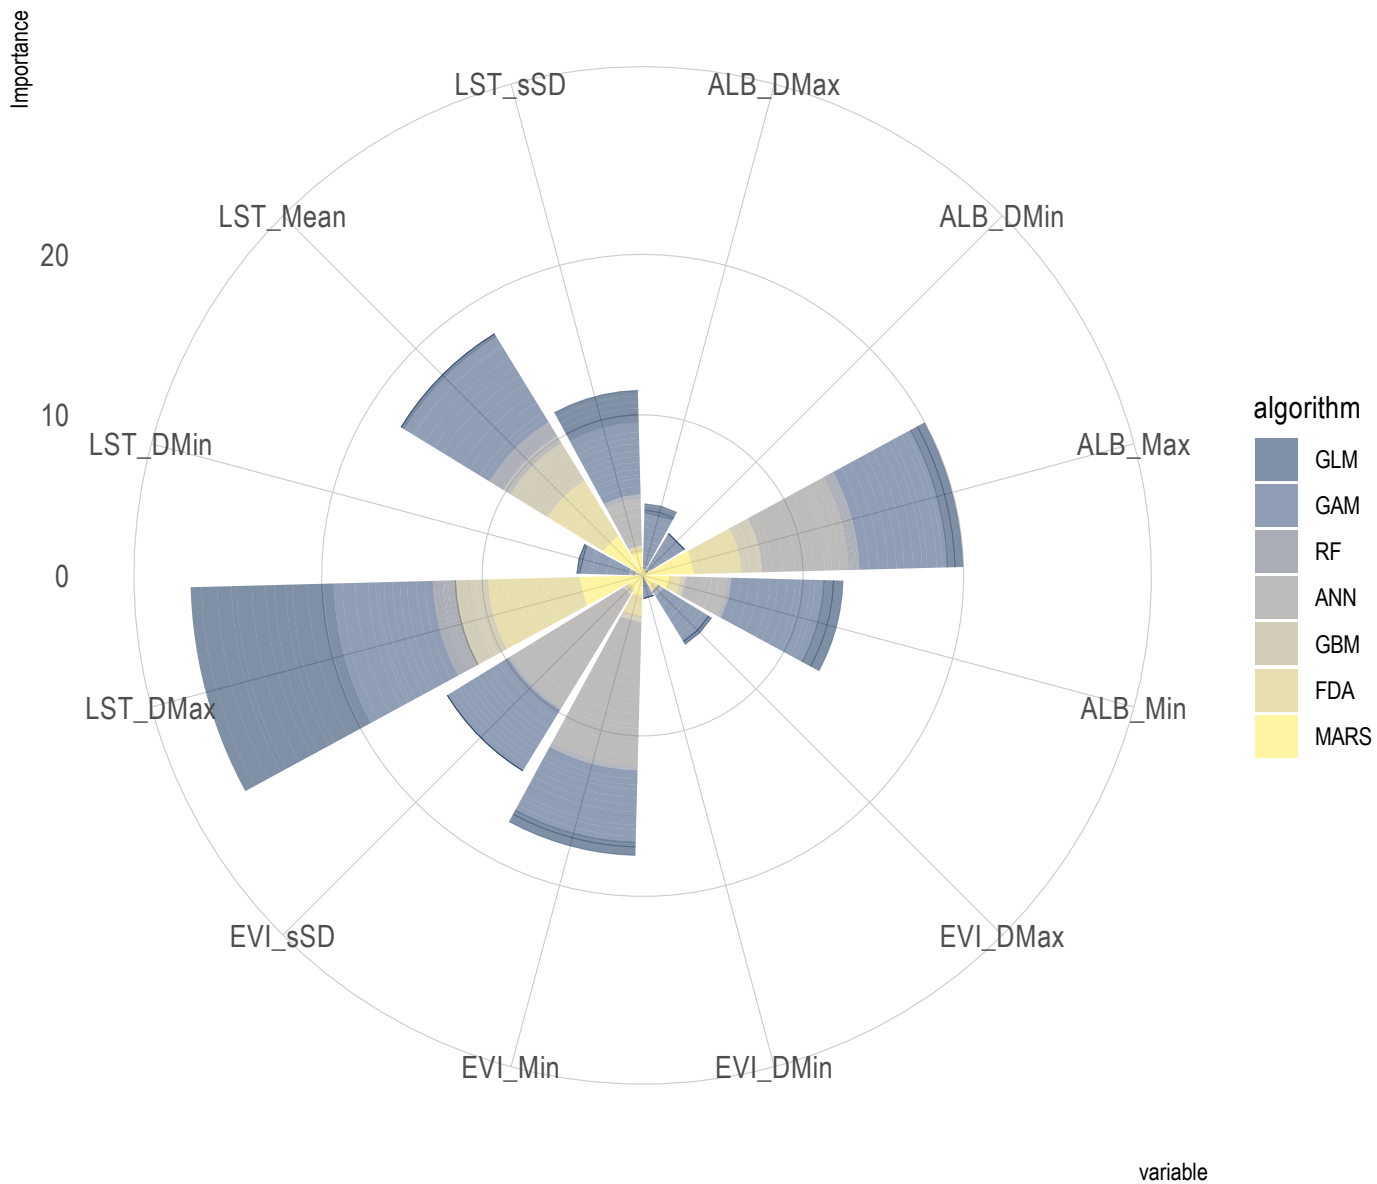

# Ccorone

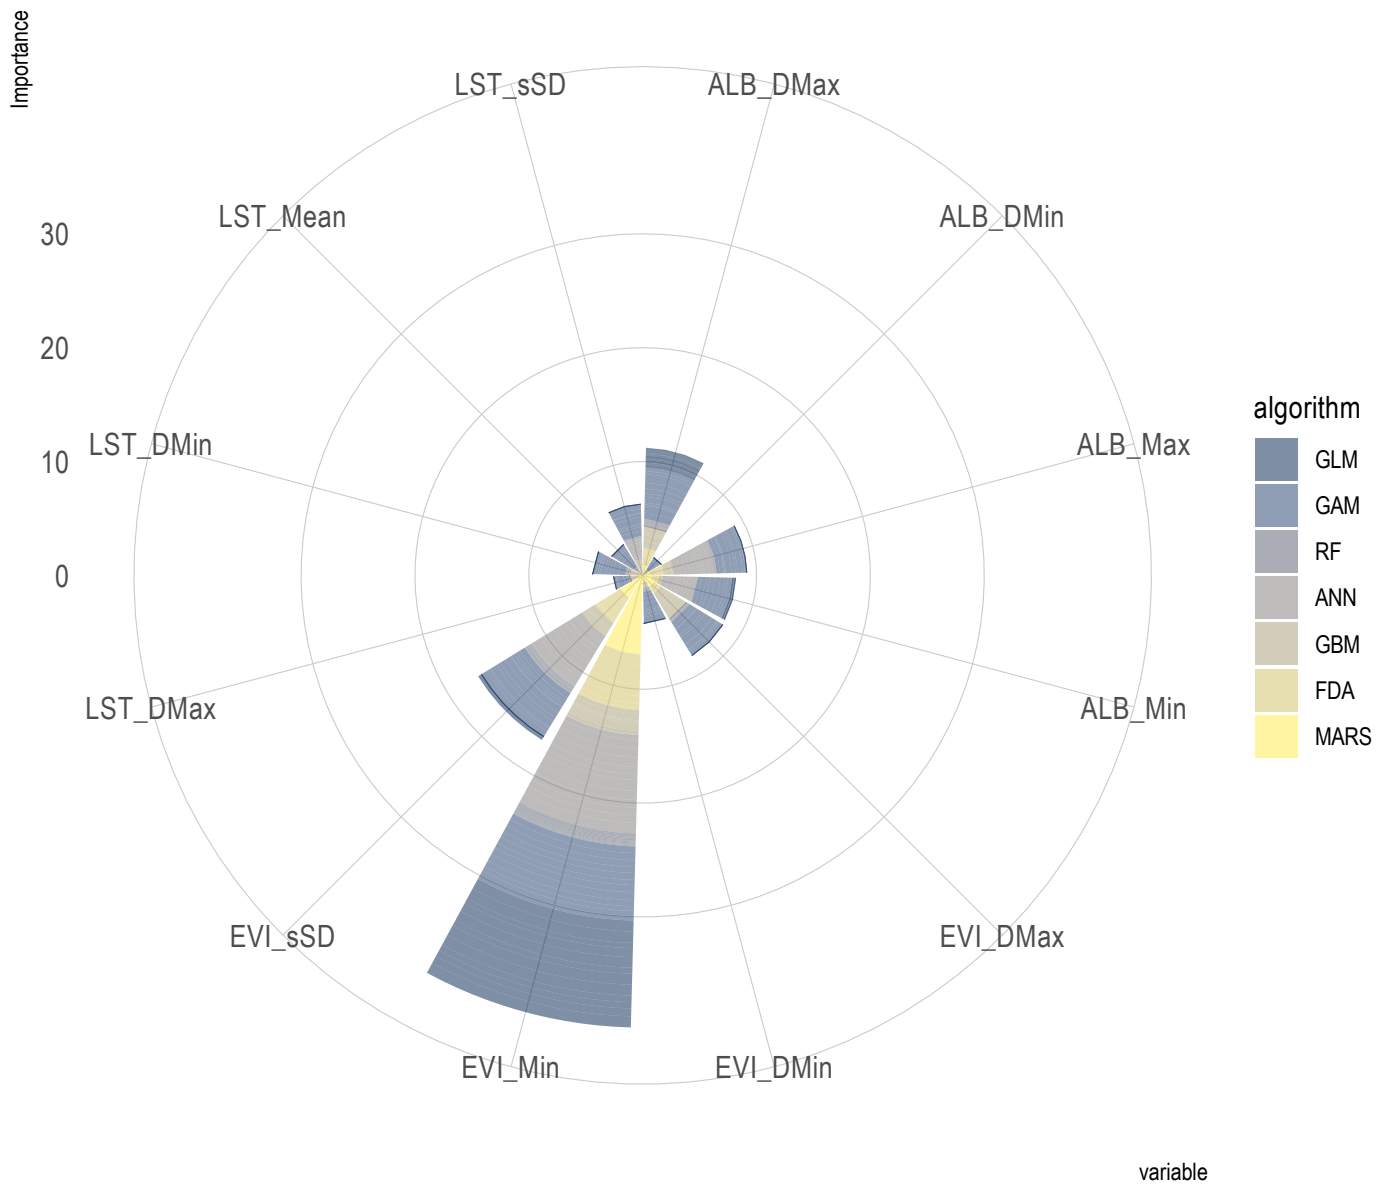

# Cgallicus

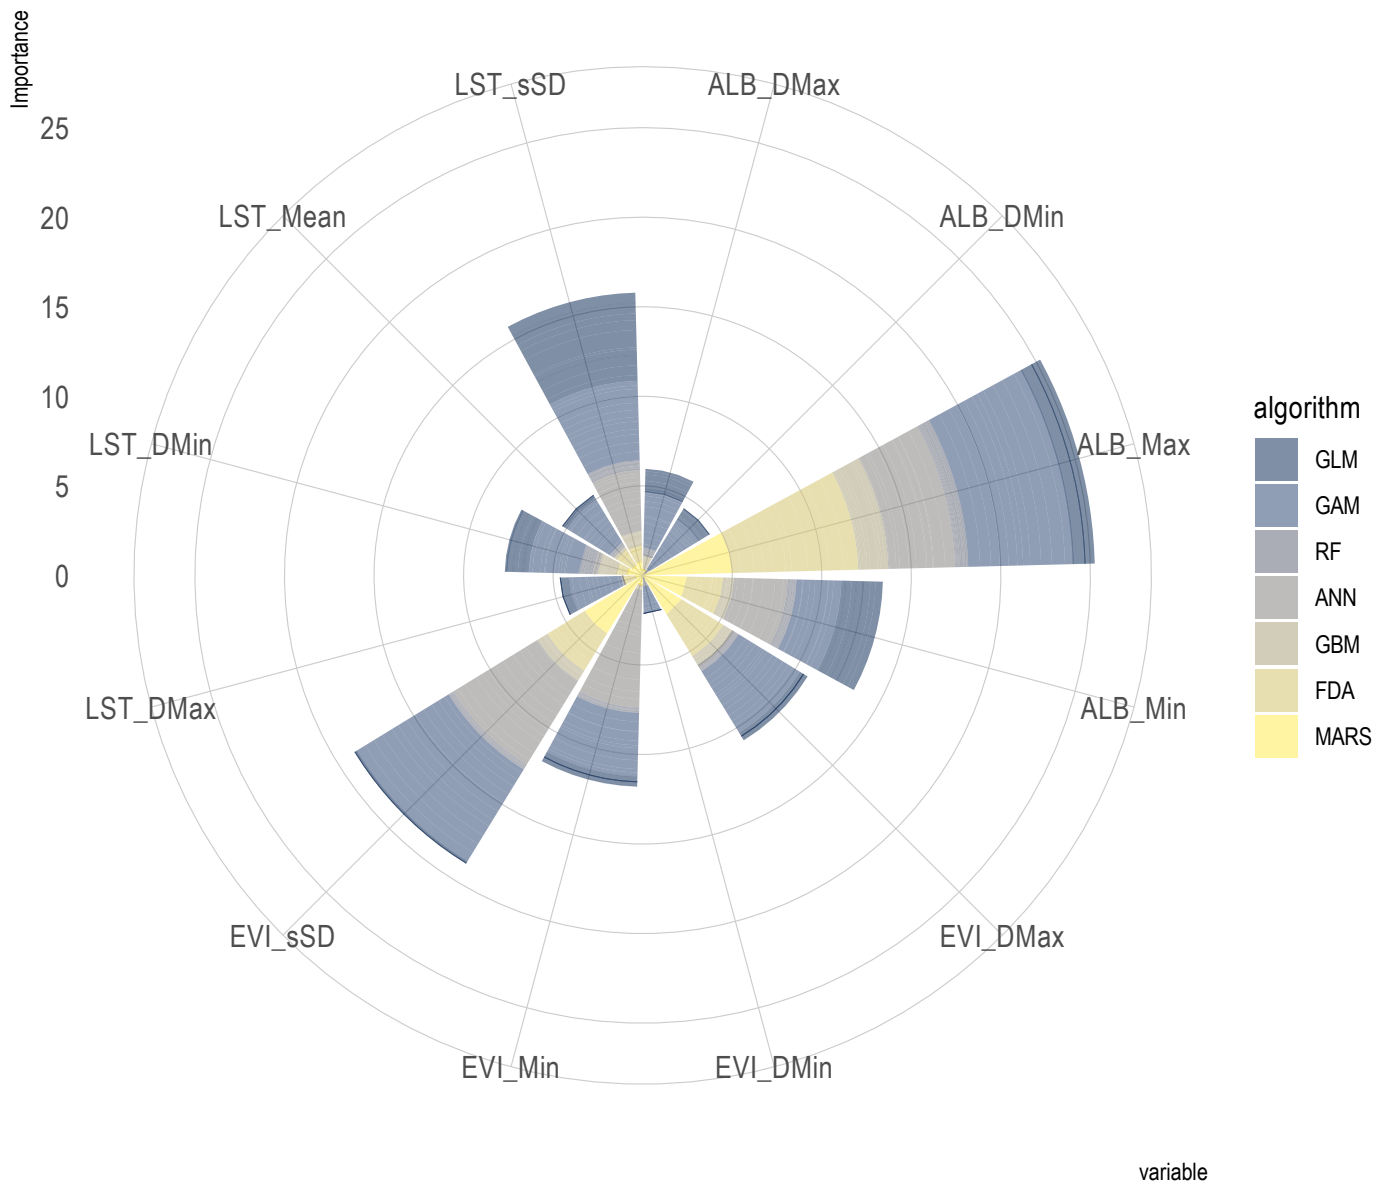

# Circcyan

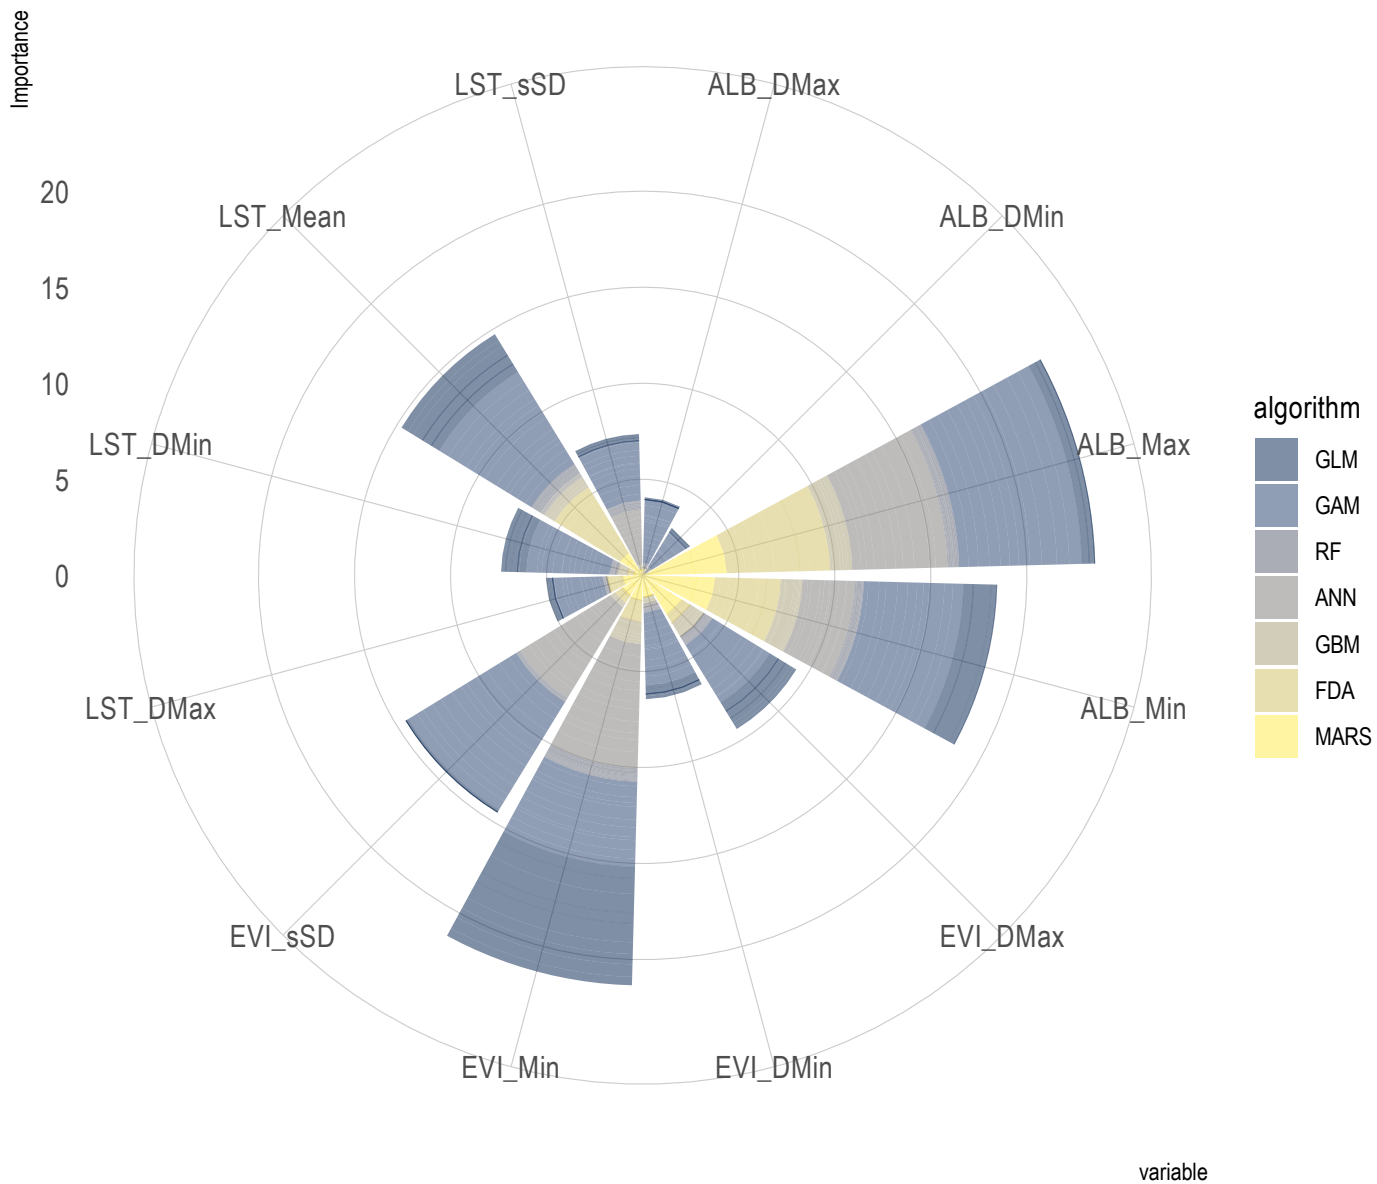

# Circpyg

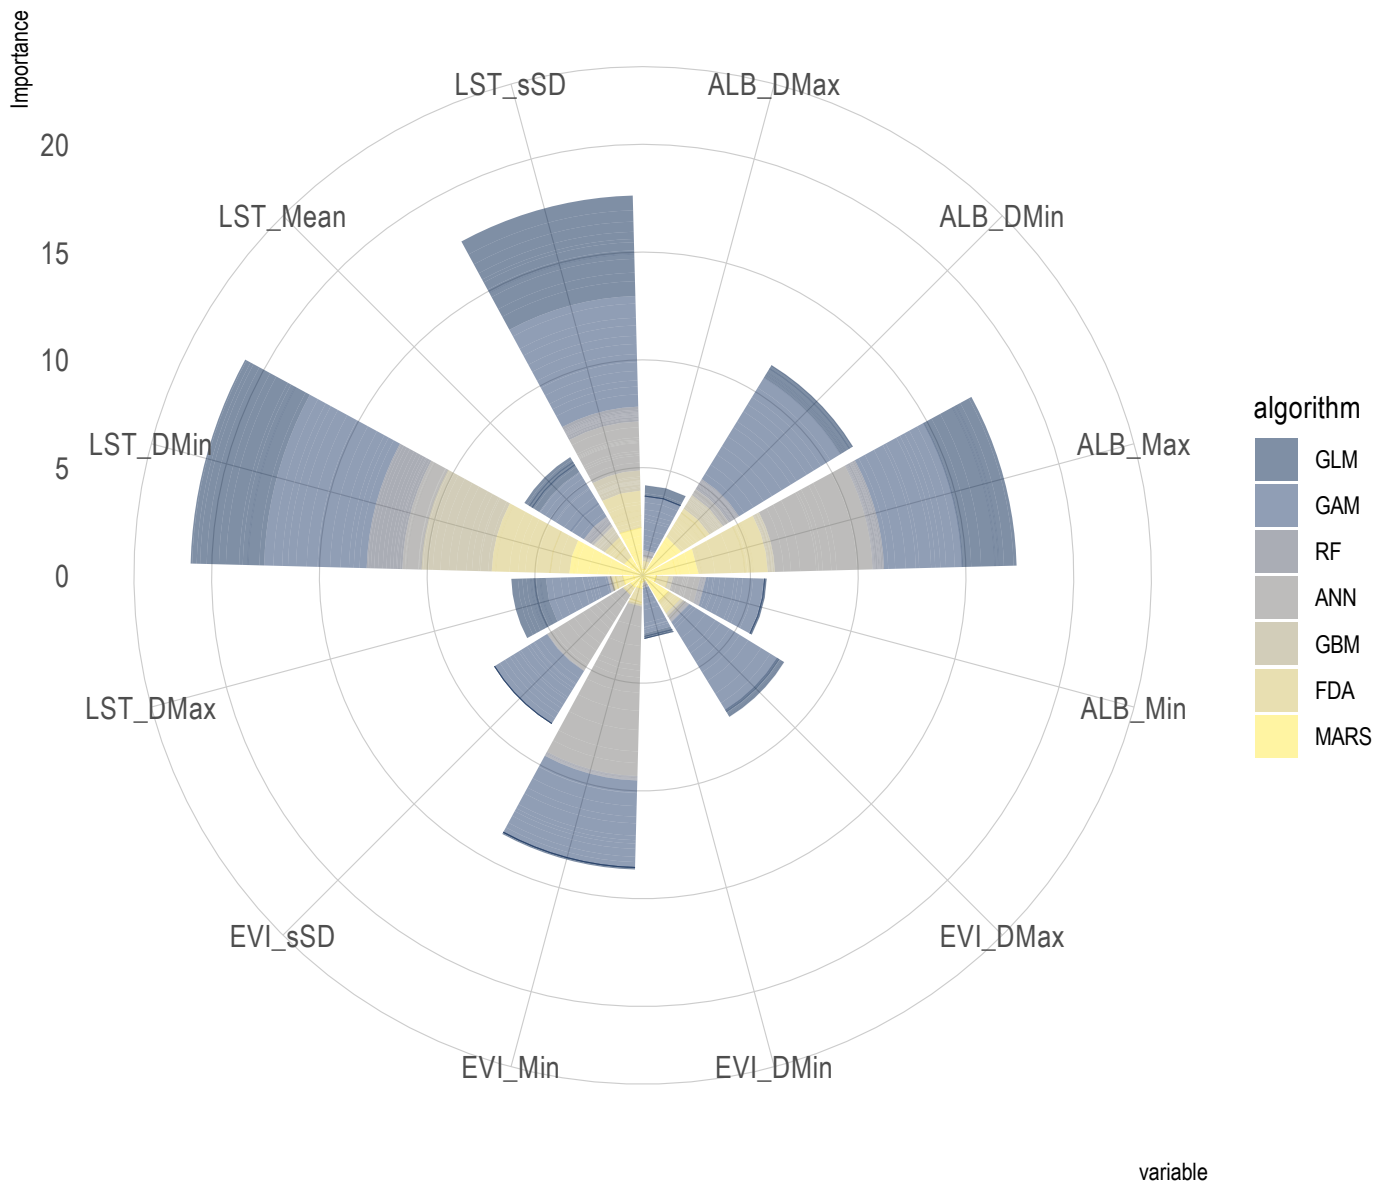

# Cotcot

Importance

20

10

0

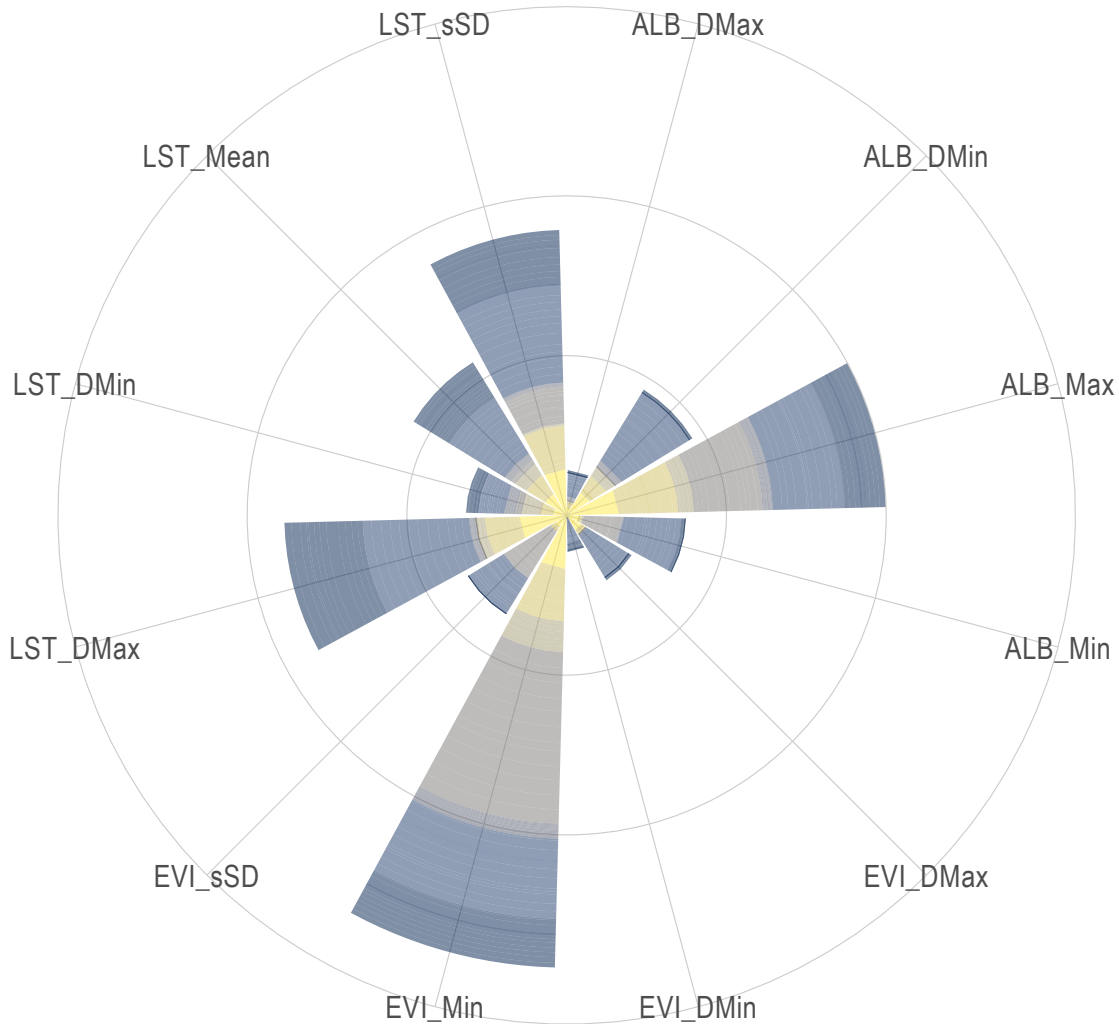

algorithm

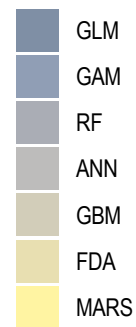

variable

# Cpalum

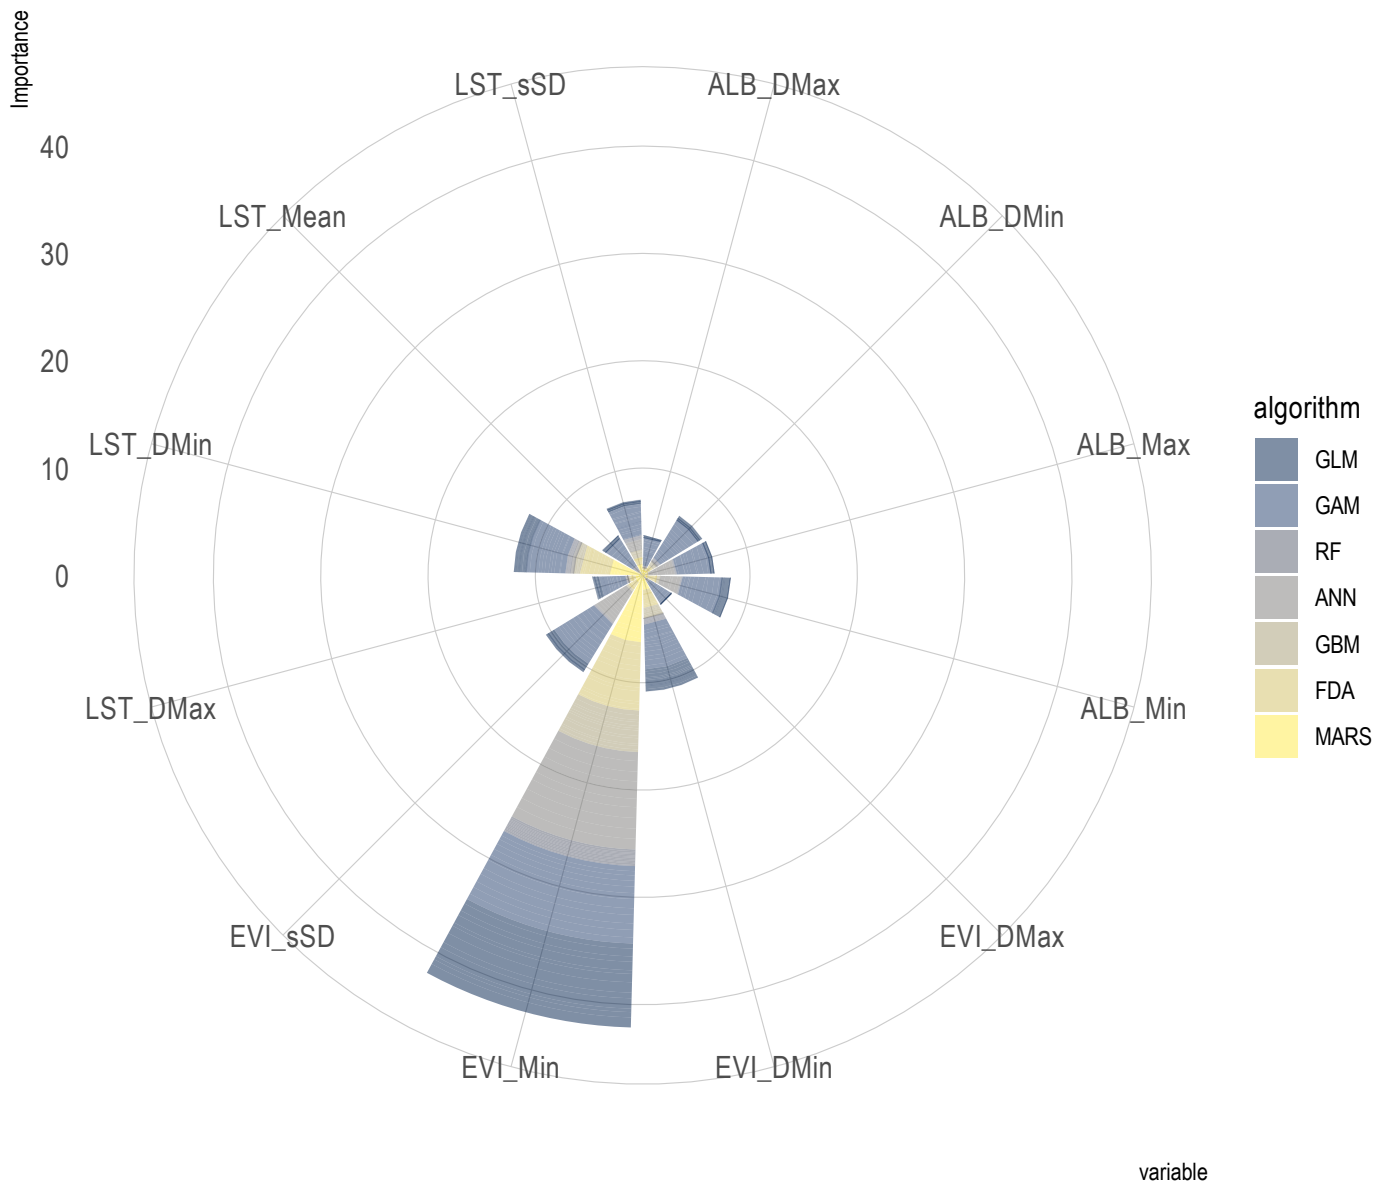

# Dmajor

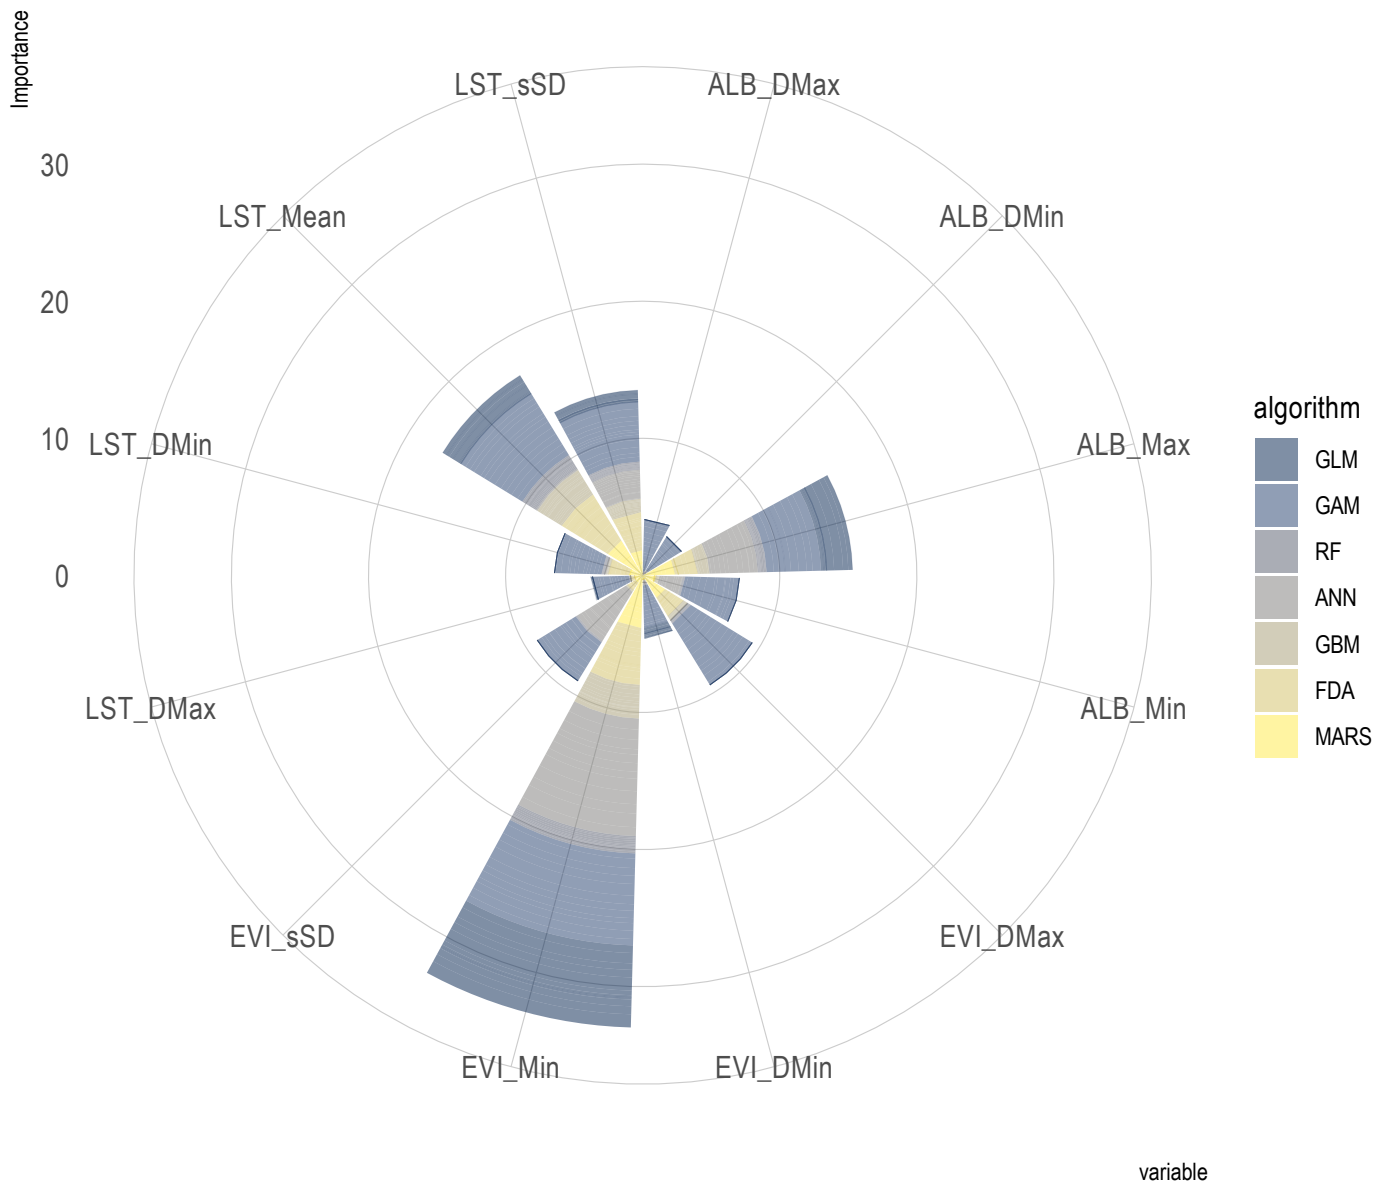

# Durbica

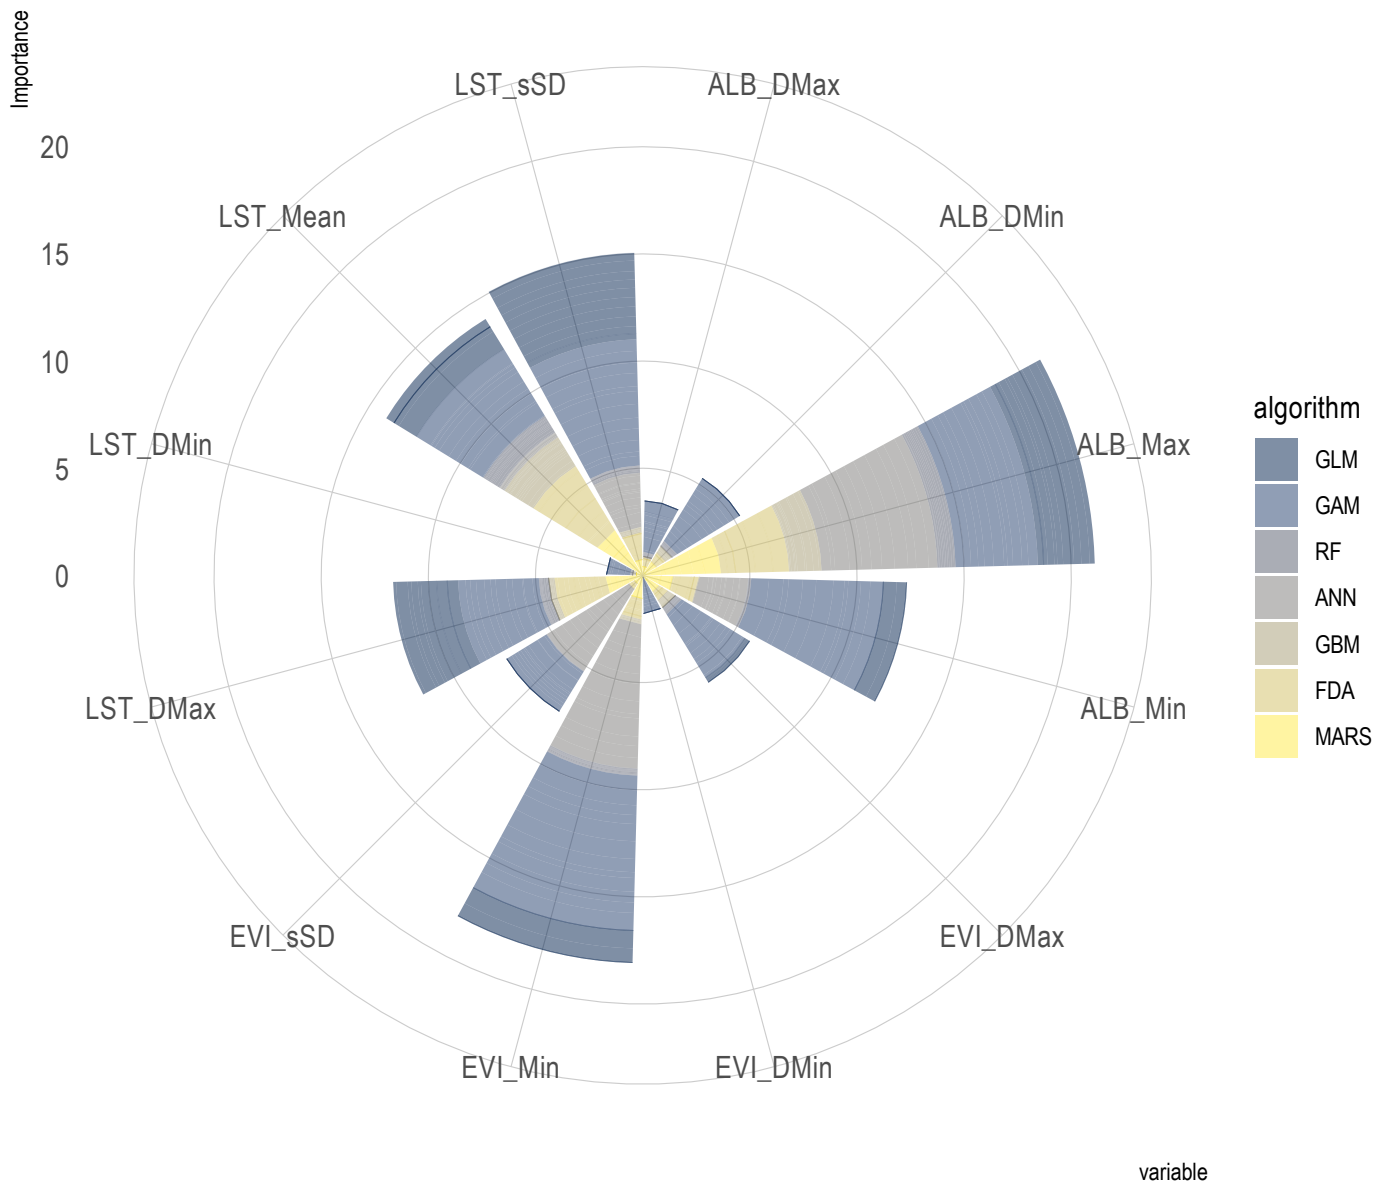

# Ecia

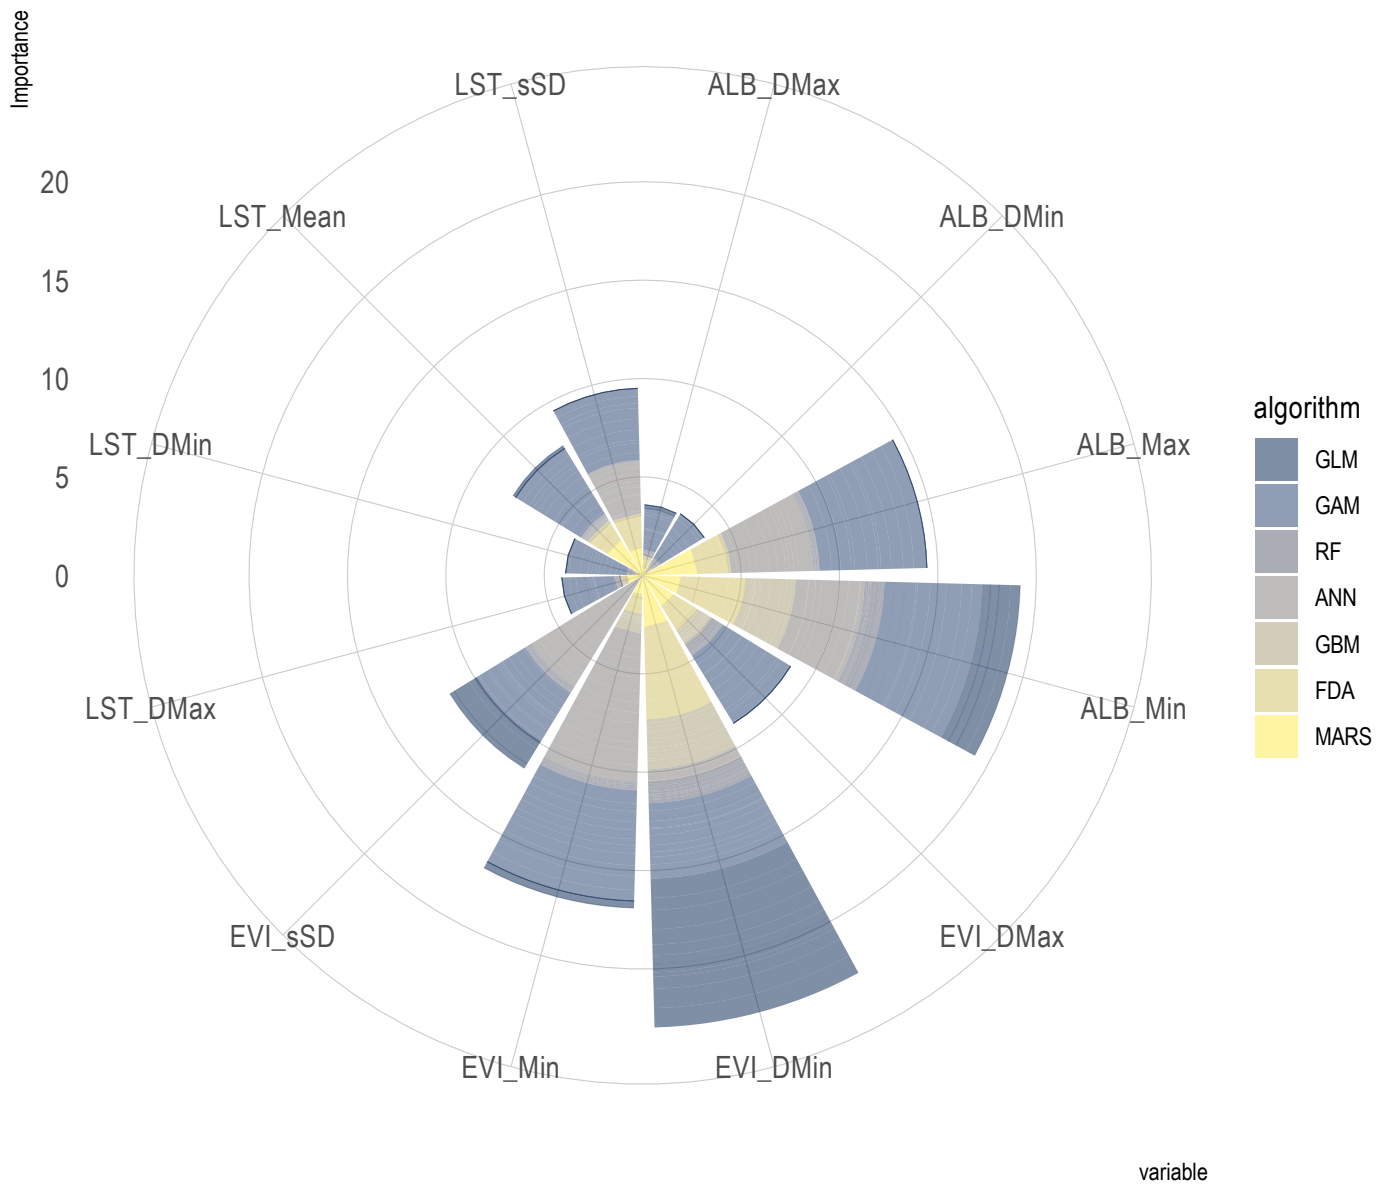

# Ecirlus

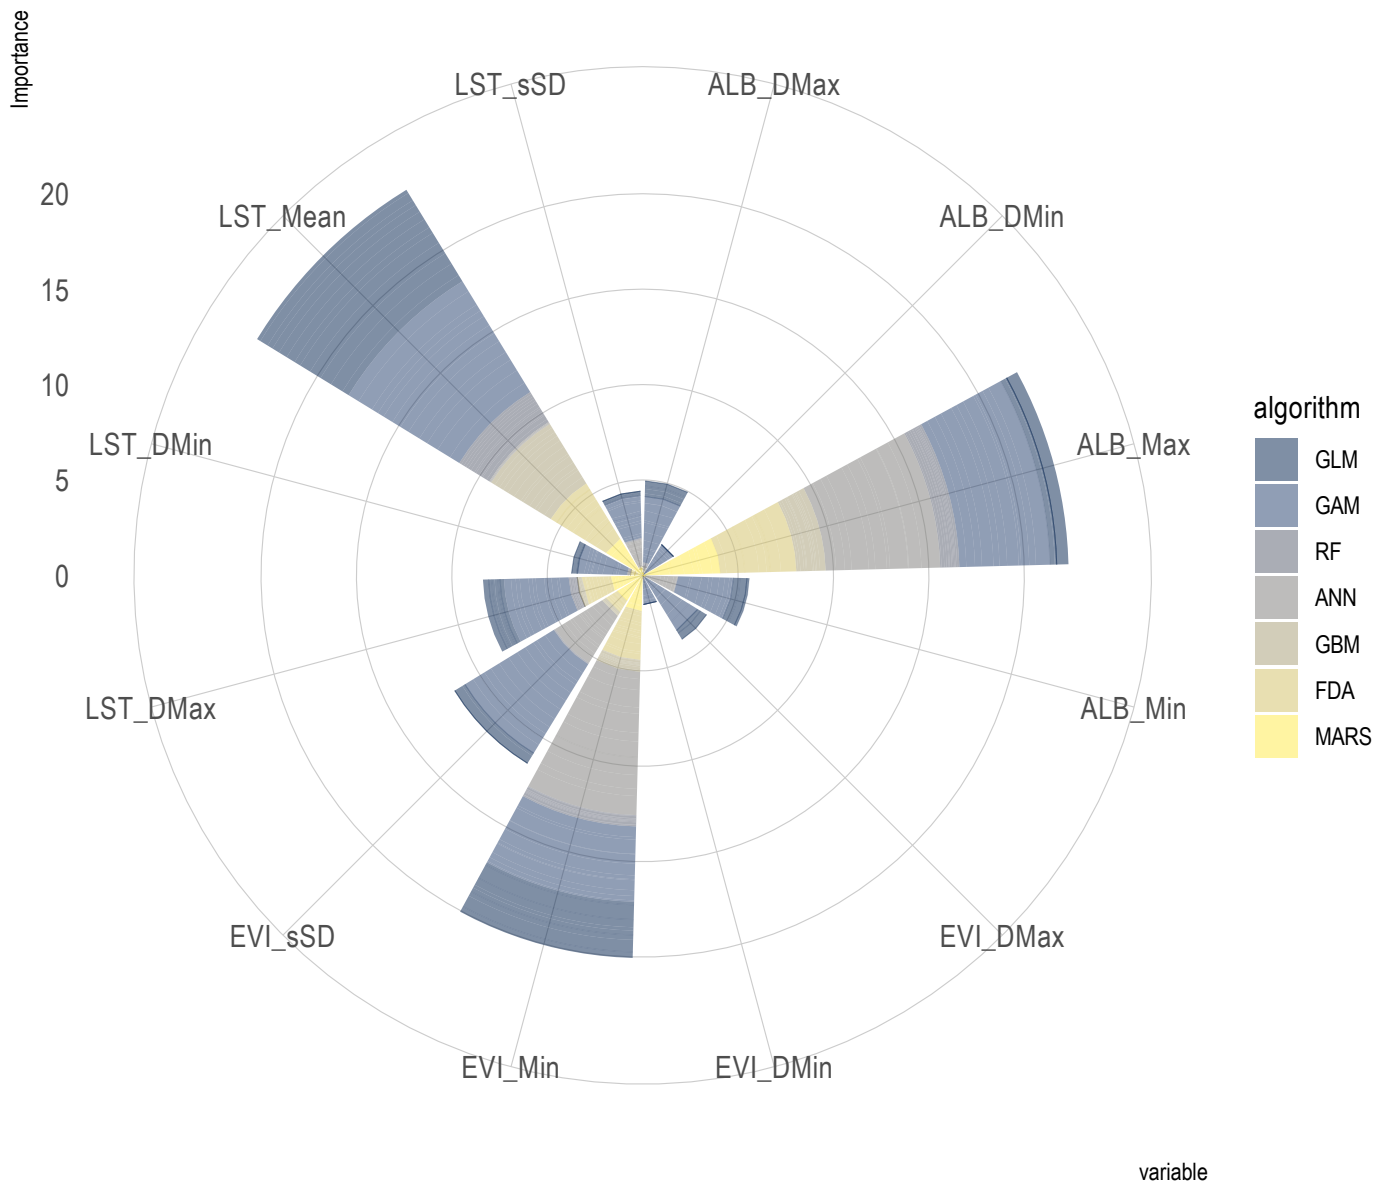

# Erube

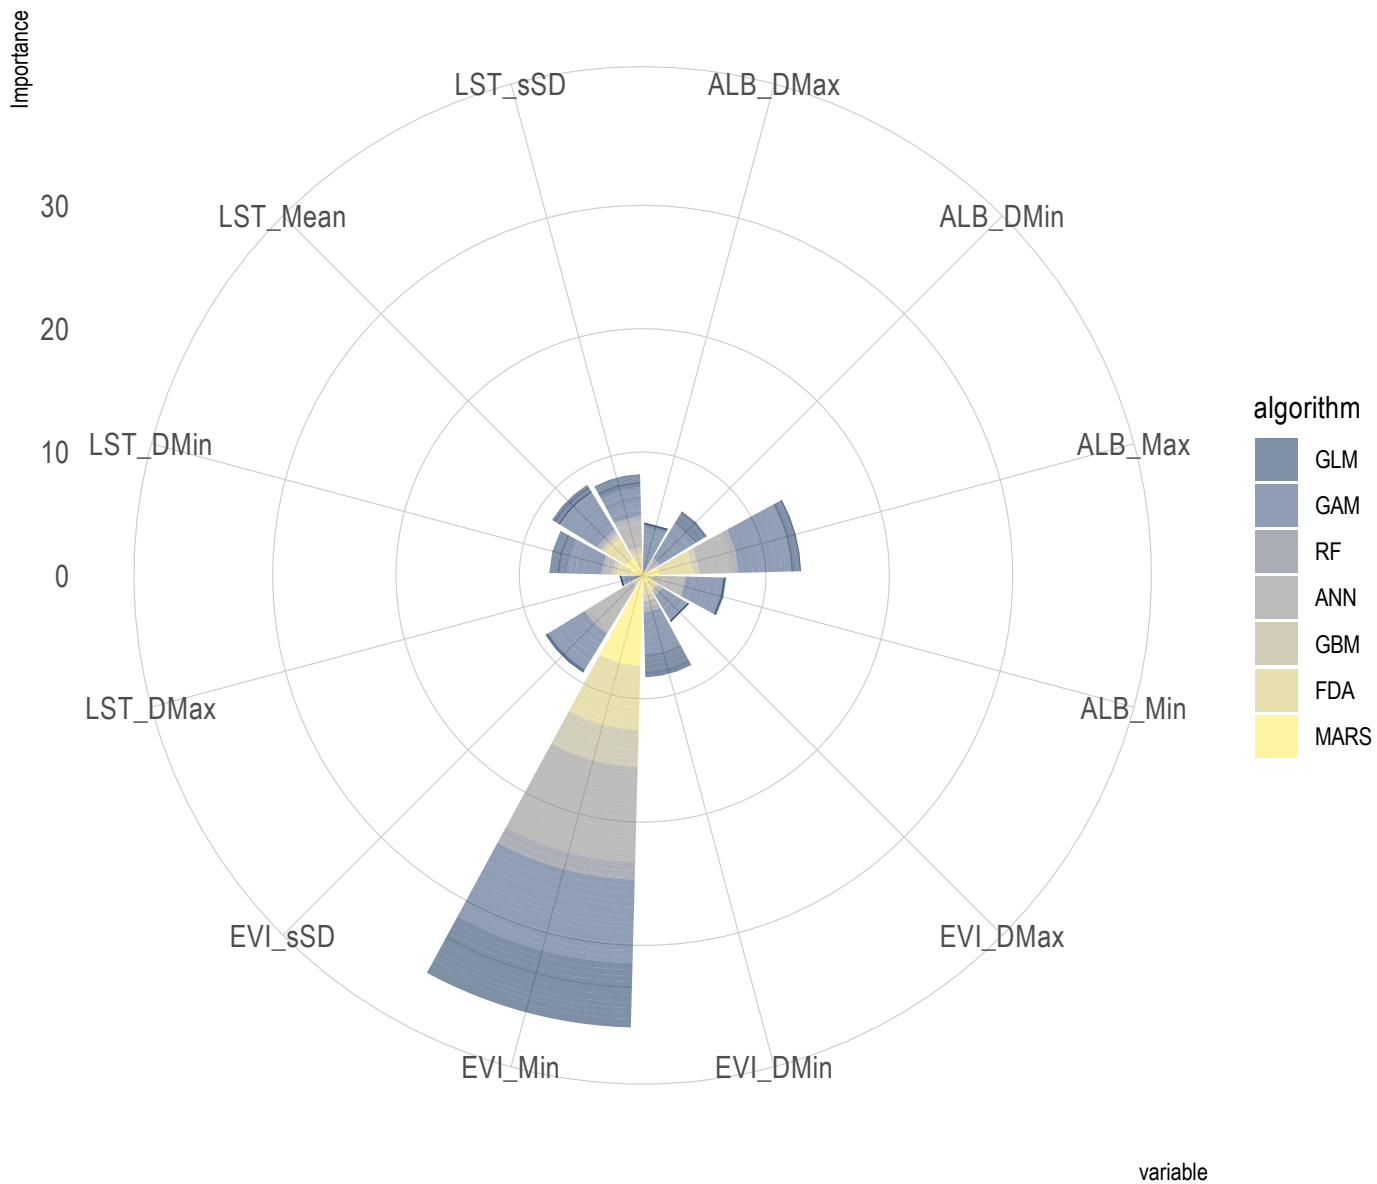

# Fcoel

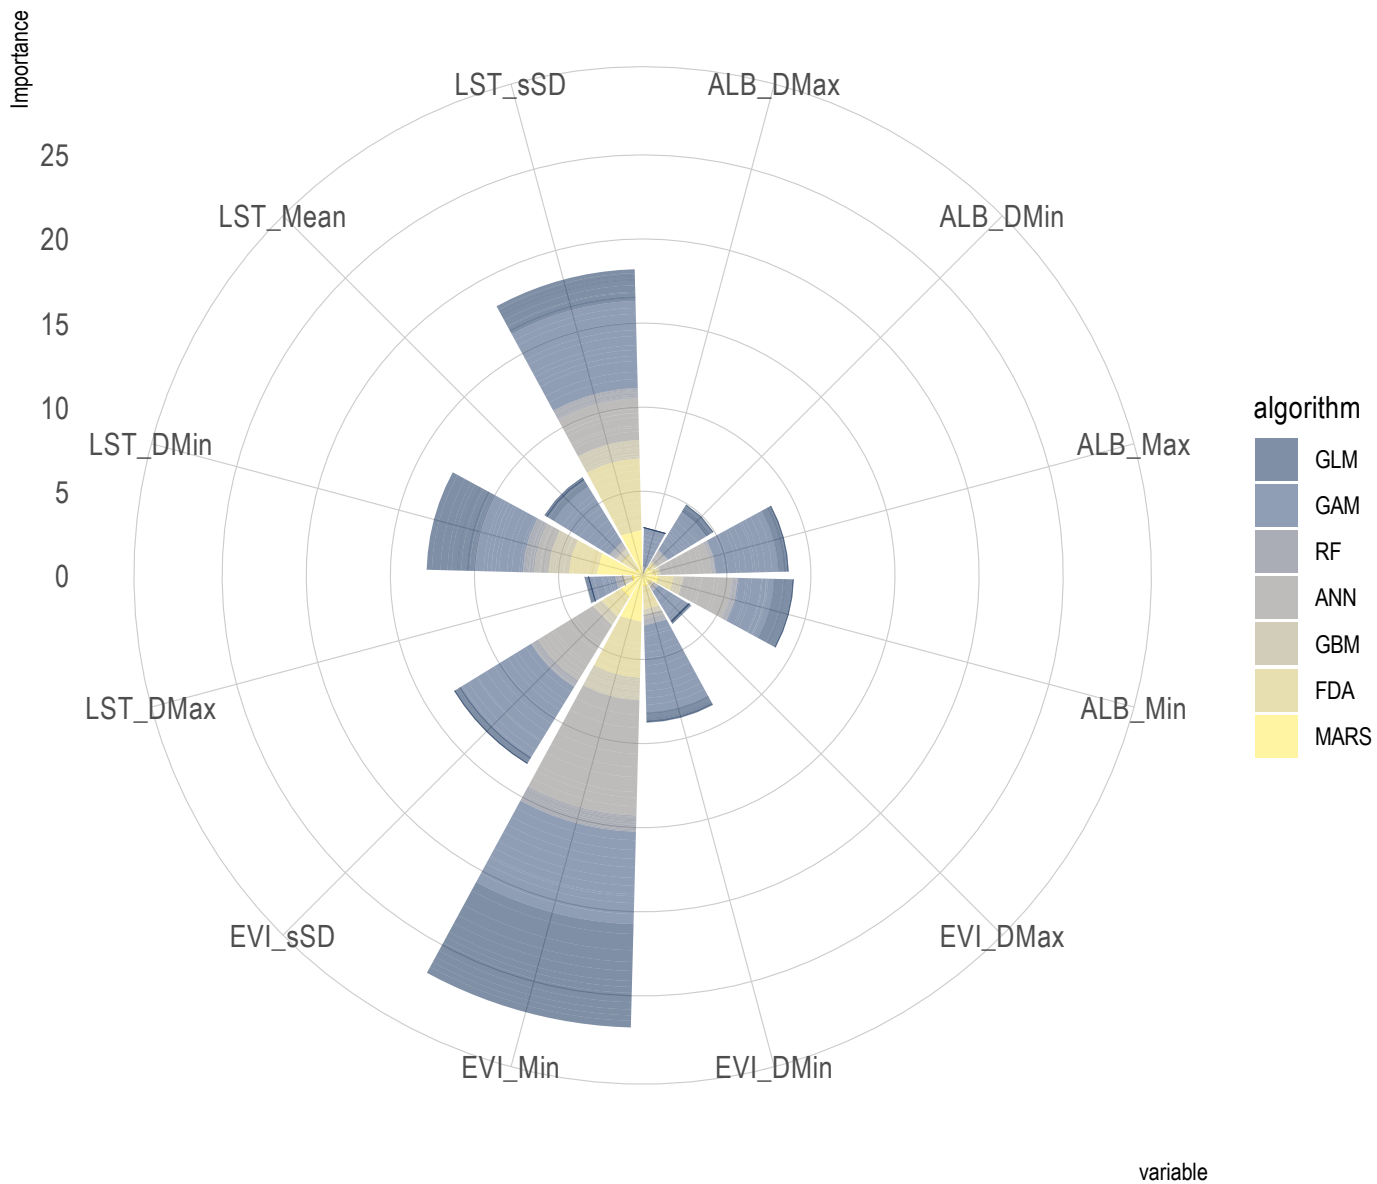

**F<sub>tin</sub>**

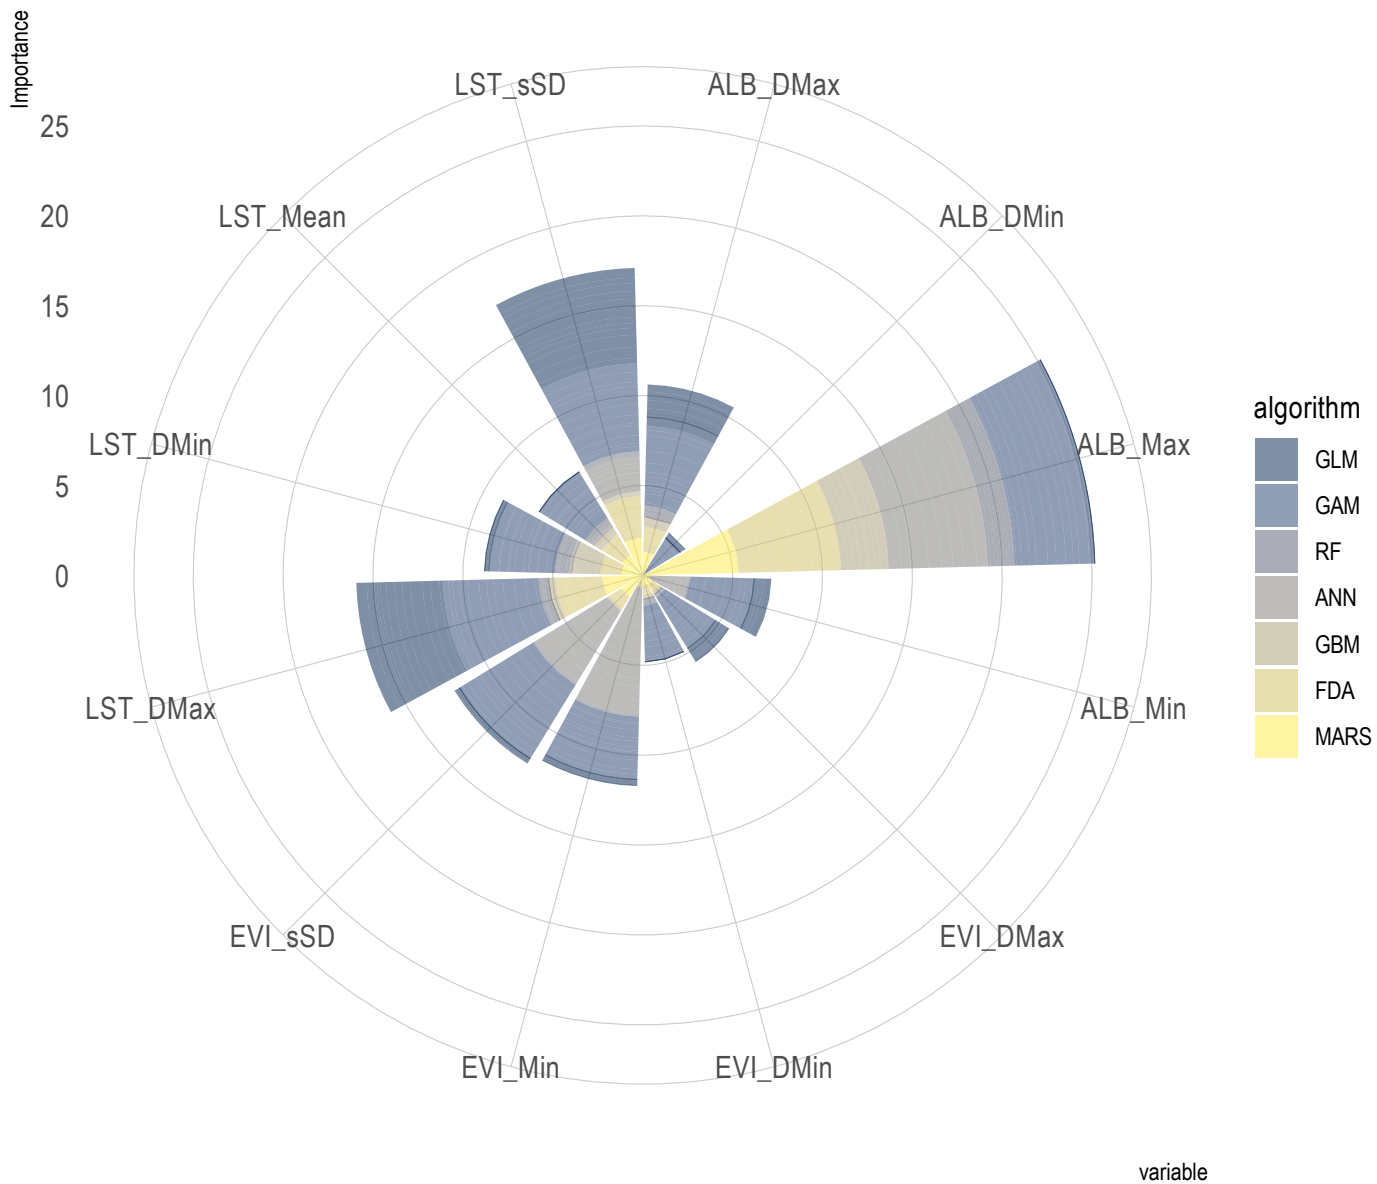

# Ggland

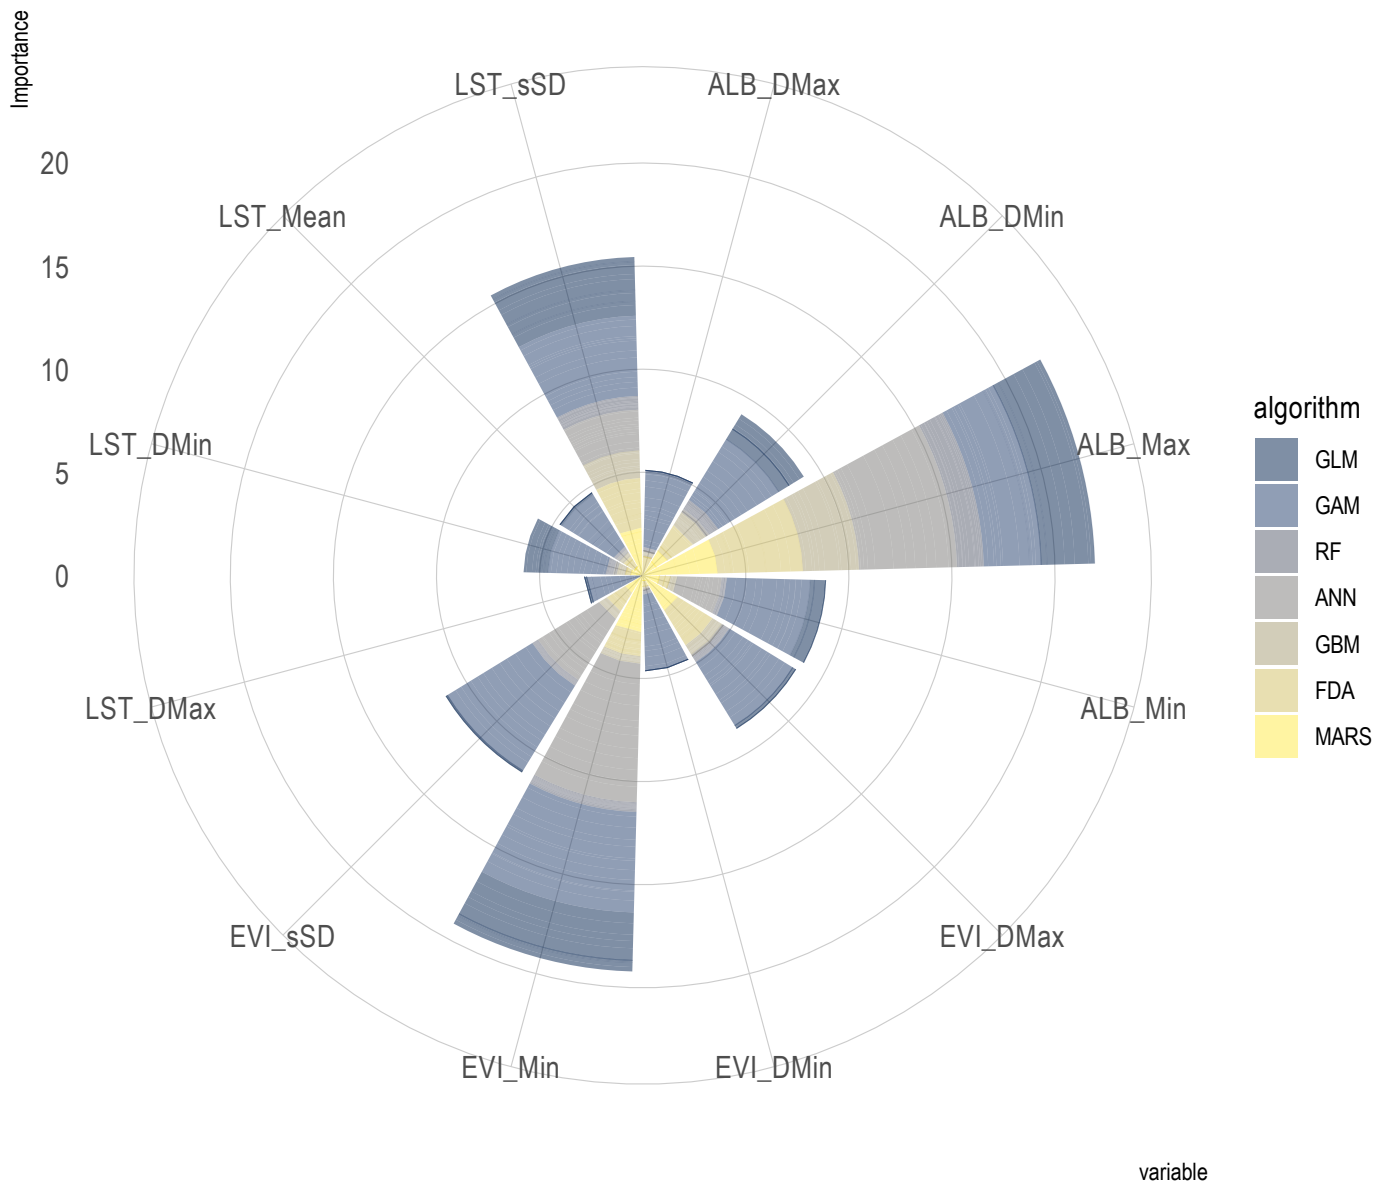

# Hpolyg

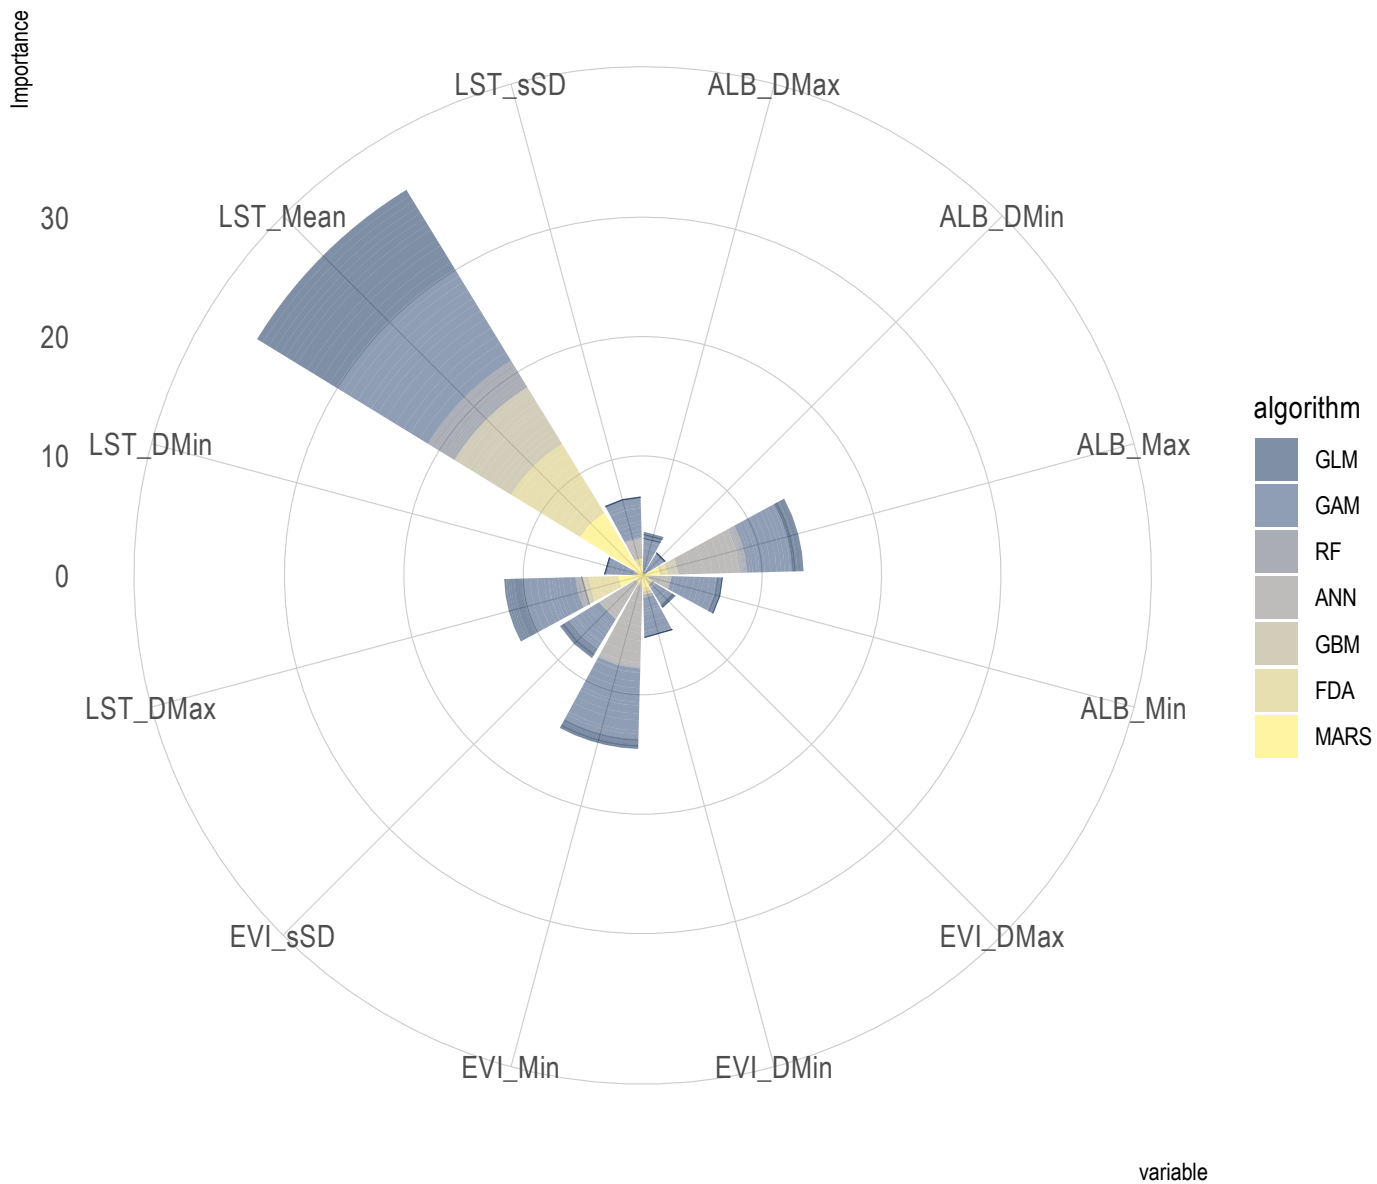

# Hrust

Importance

20

10

0

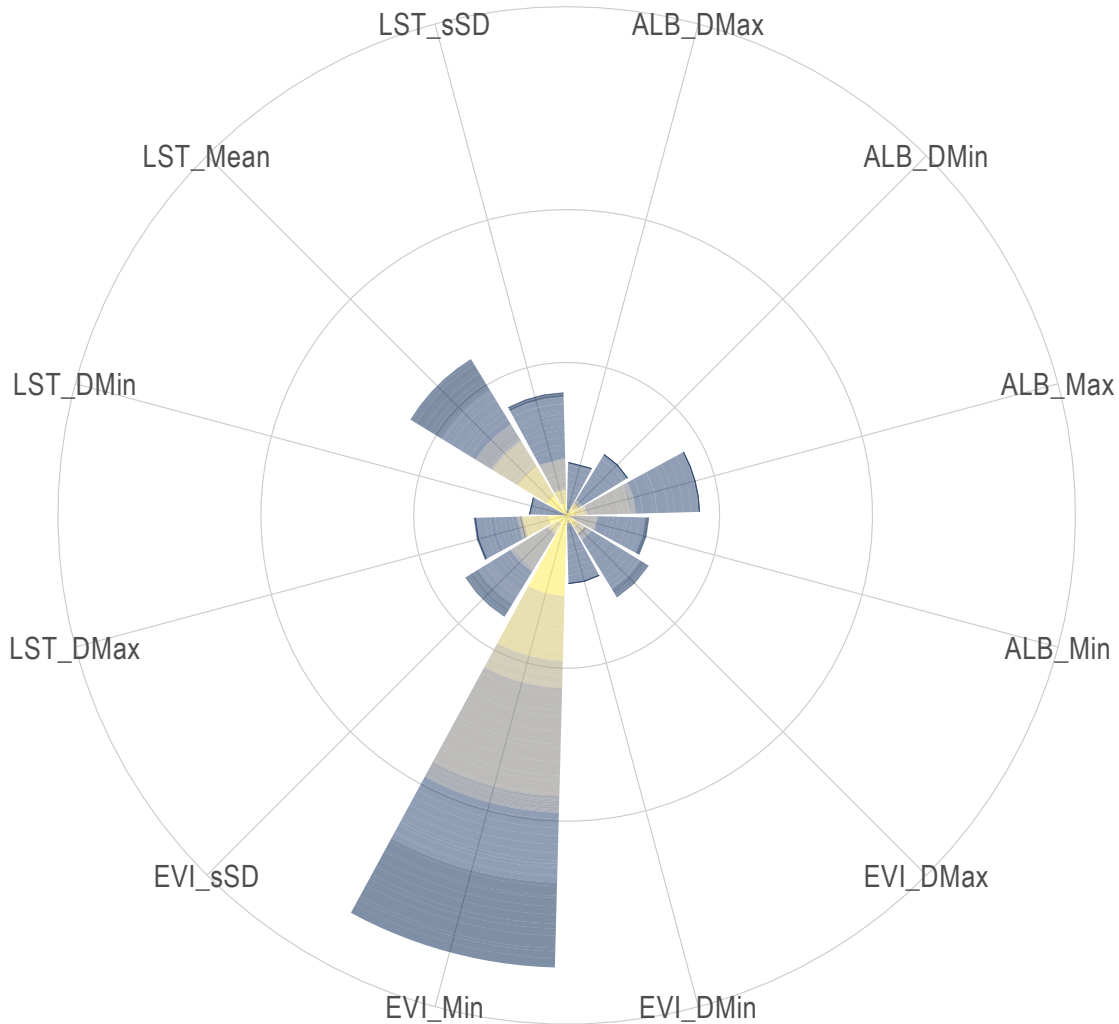

algorithm



variable

# Lcoll

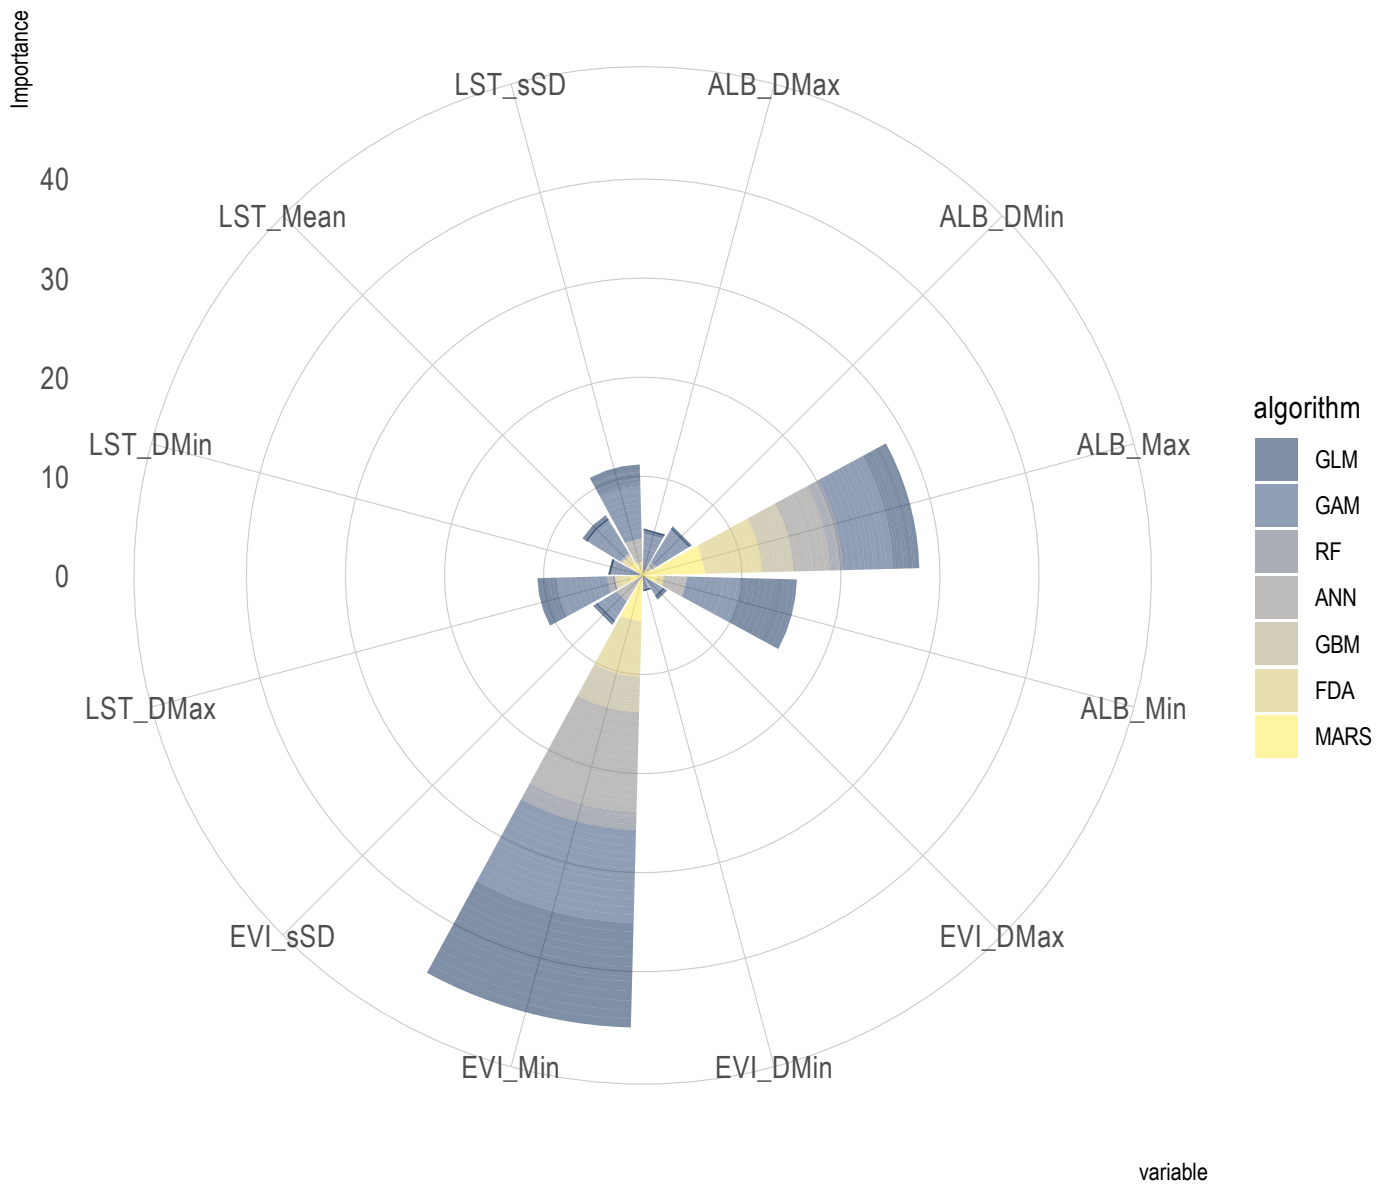

# Lmegar

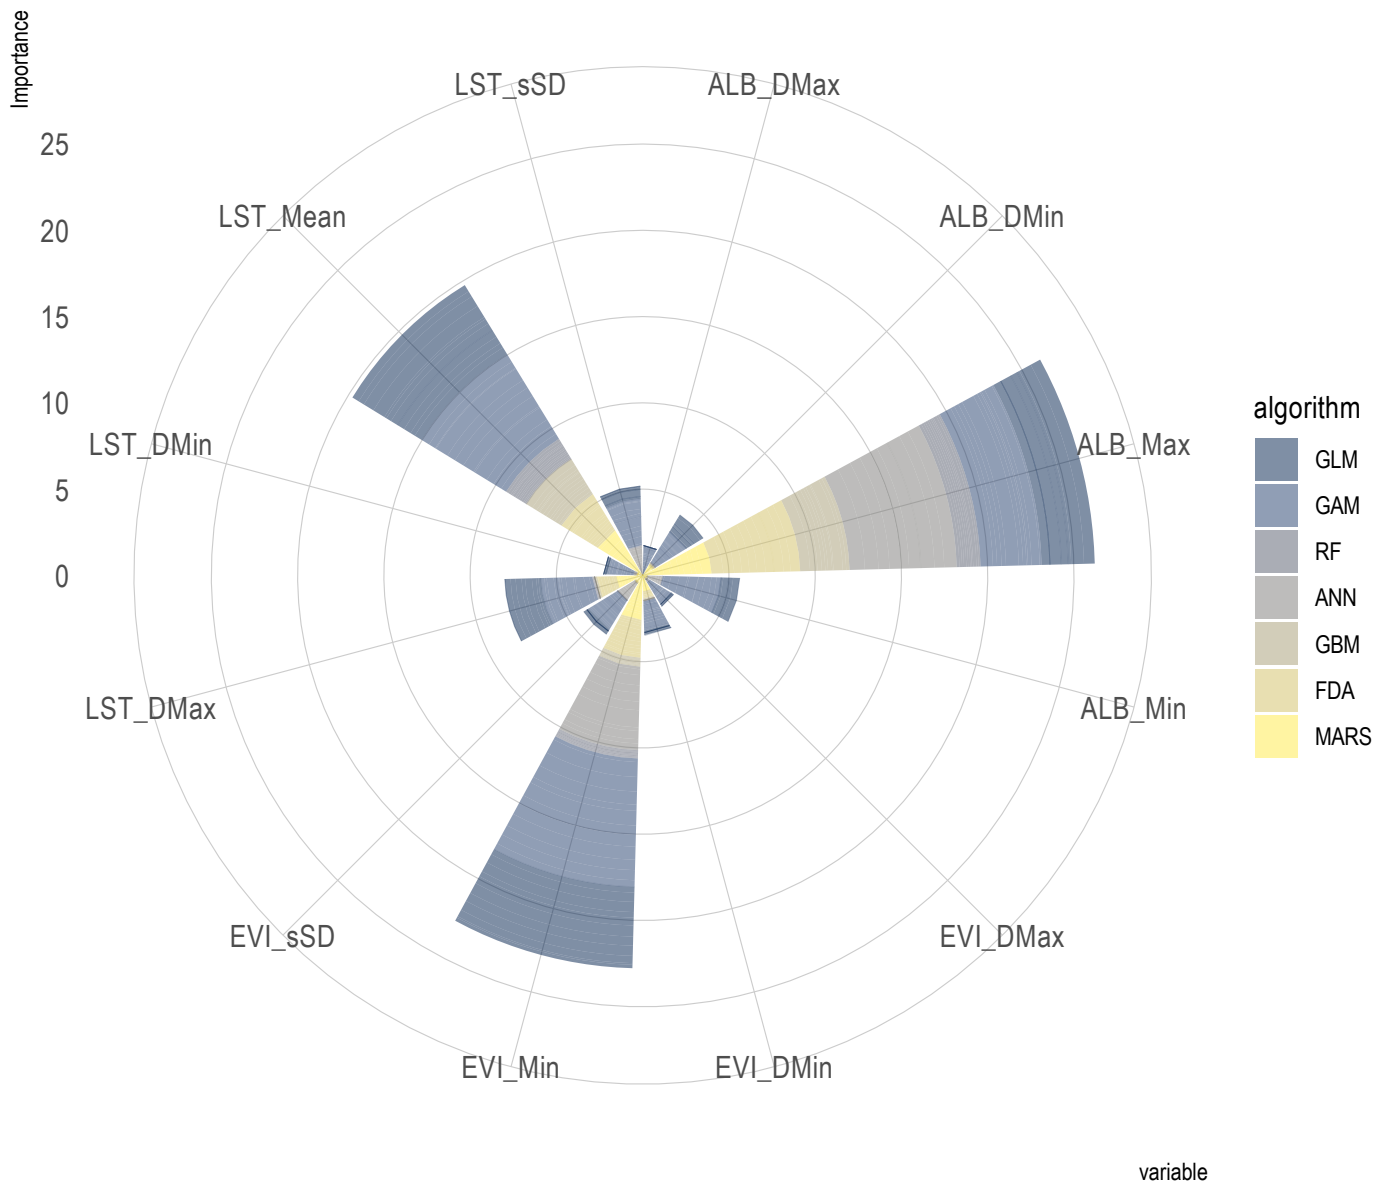

# Lularb

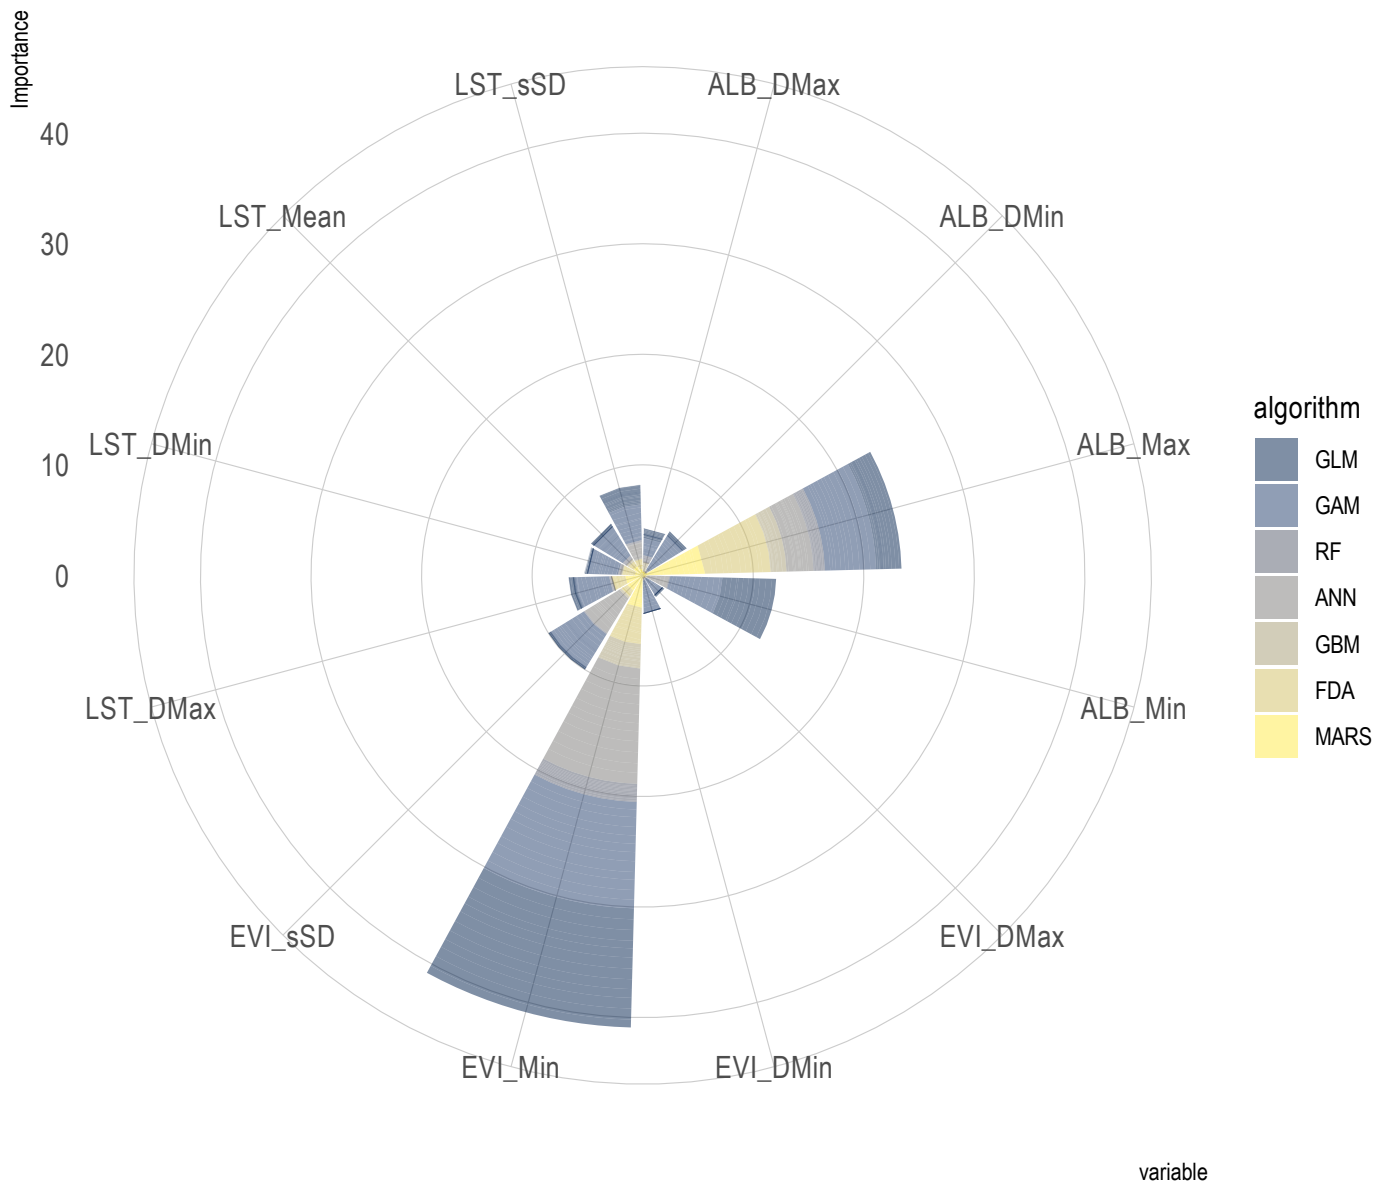

# Malba

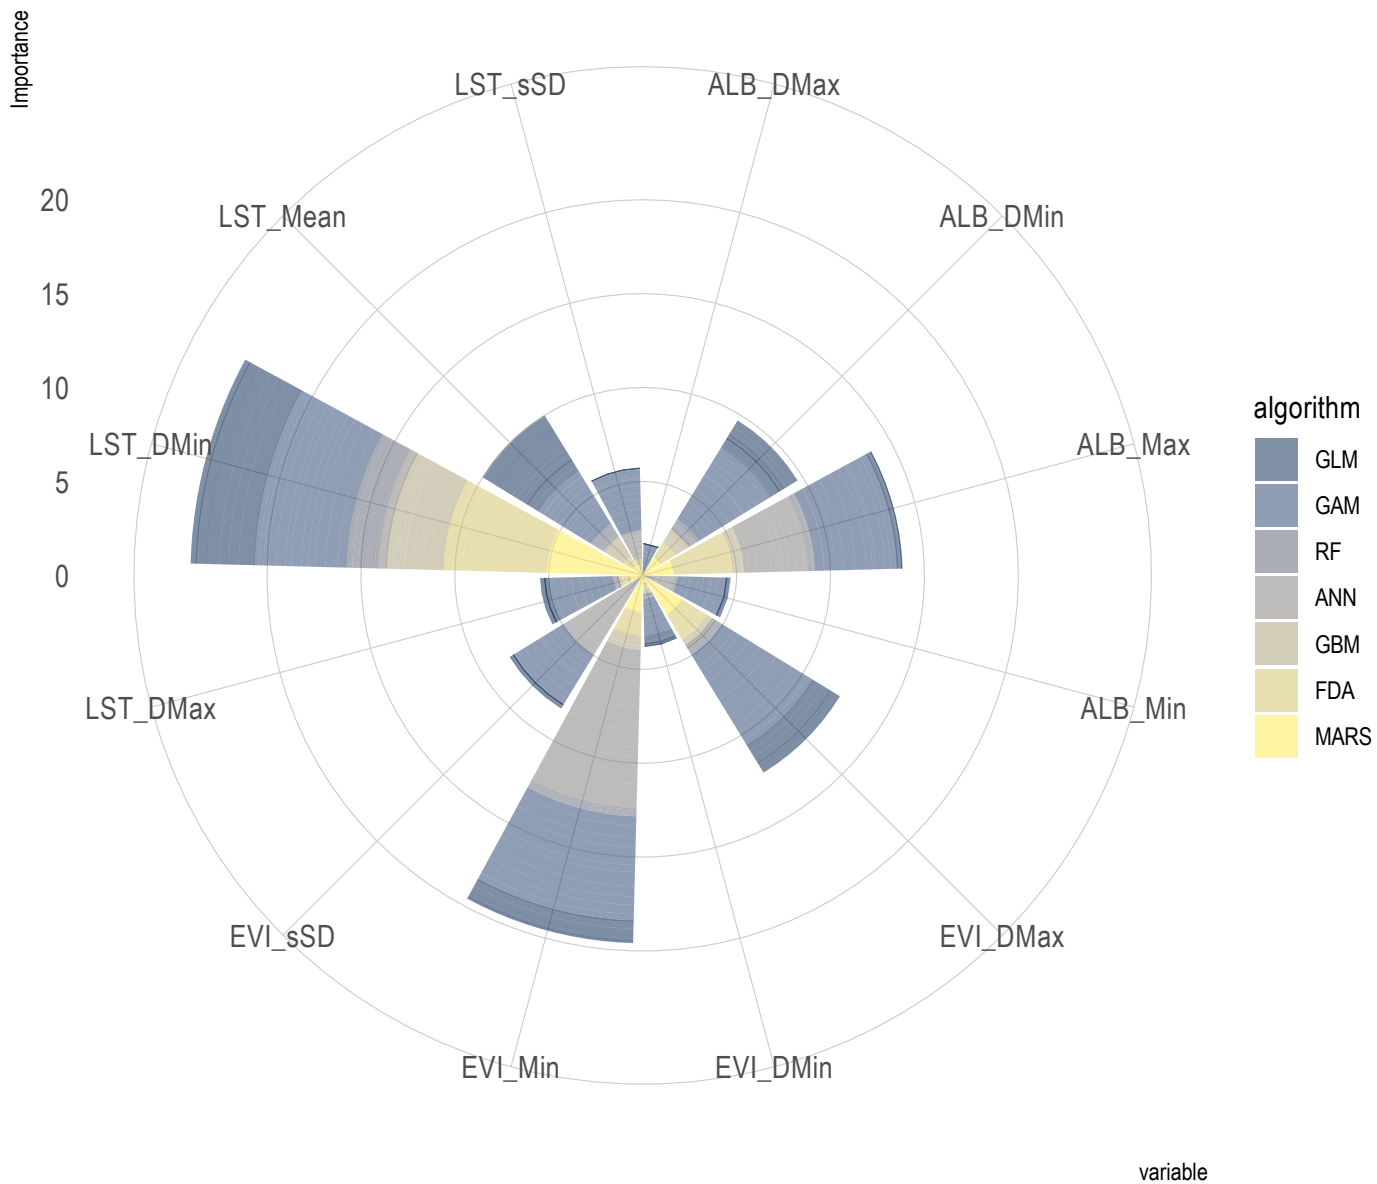

# Mapiast

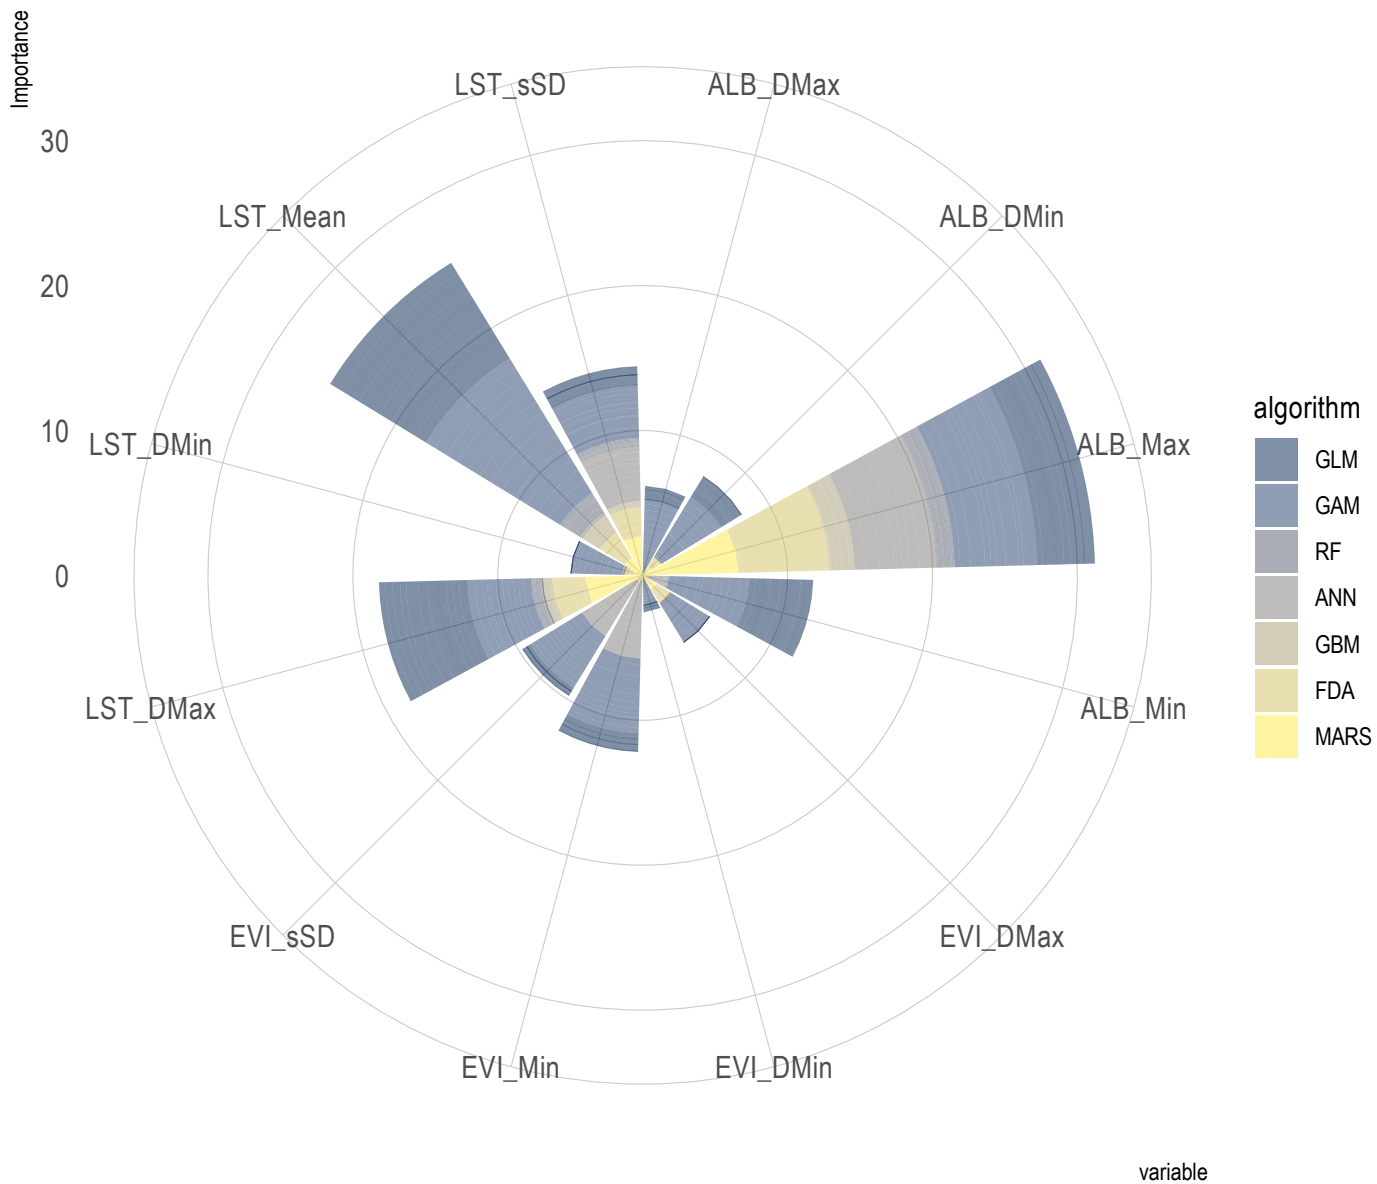

# Mcaland

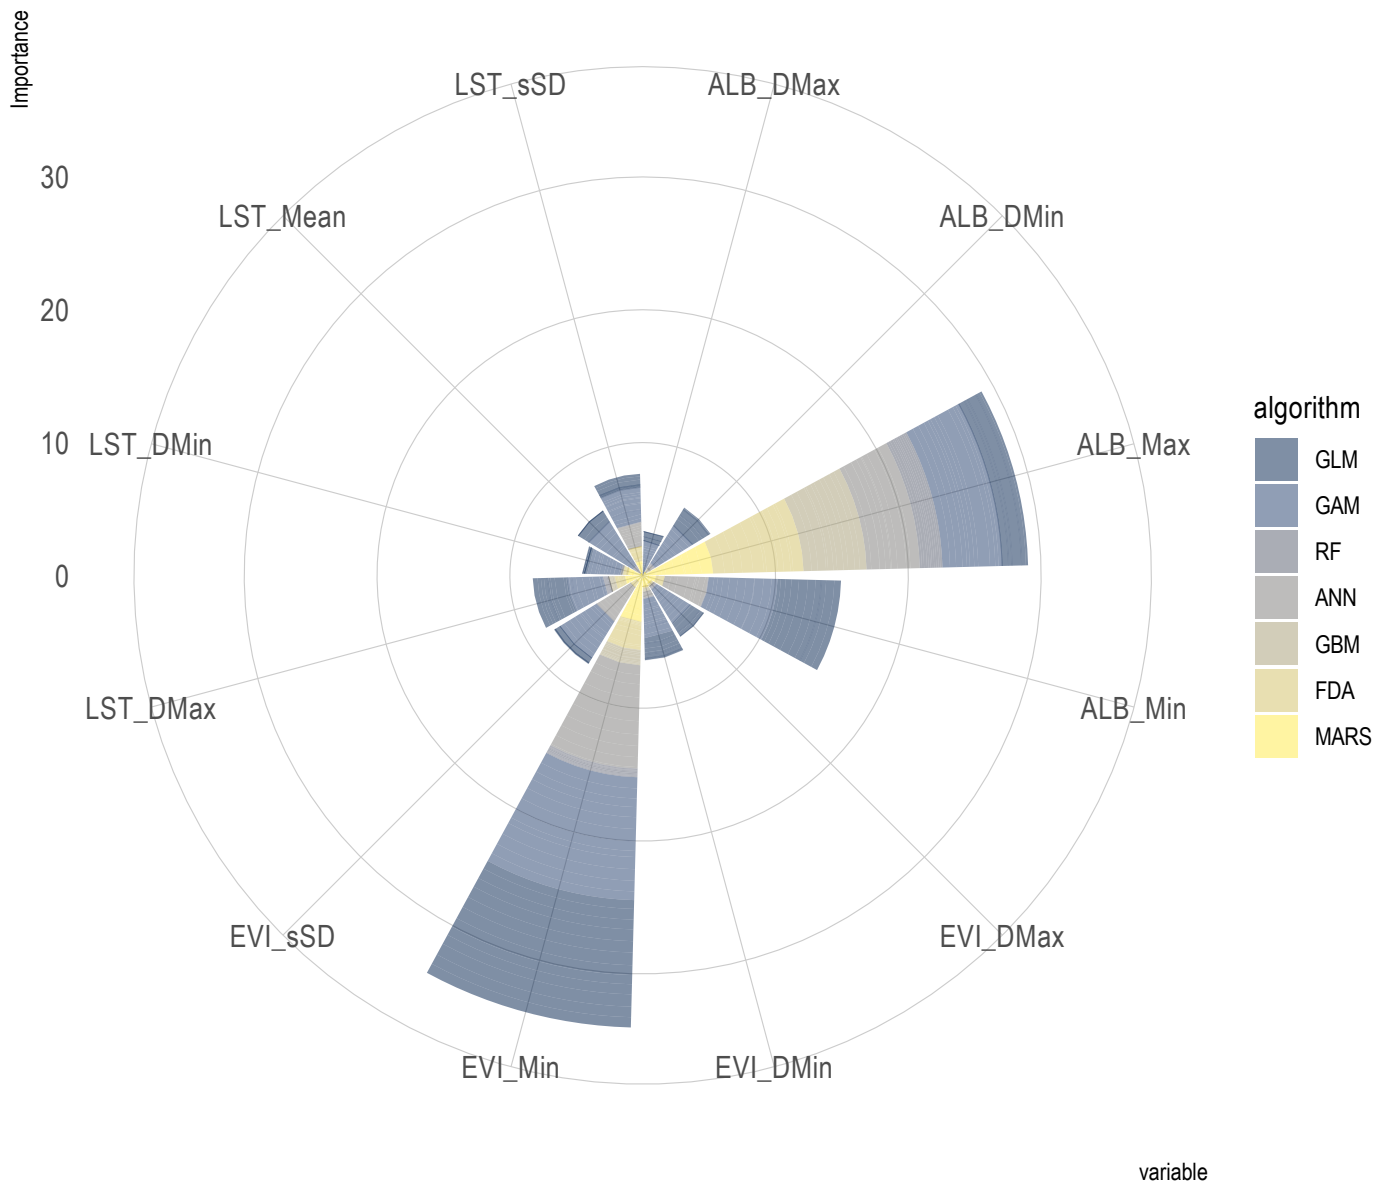

# Mciner

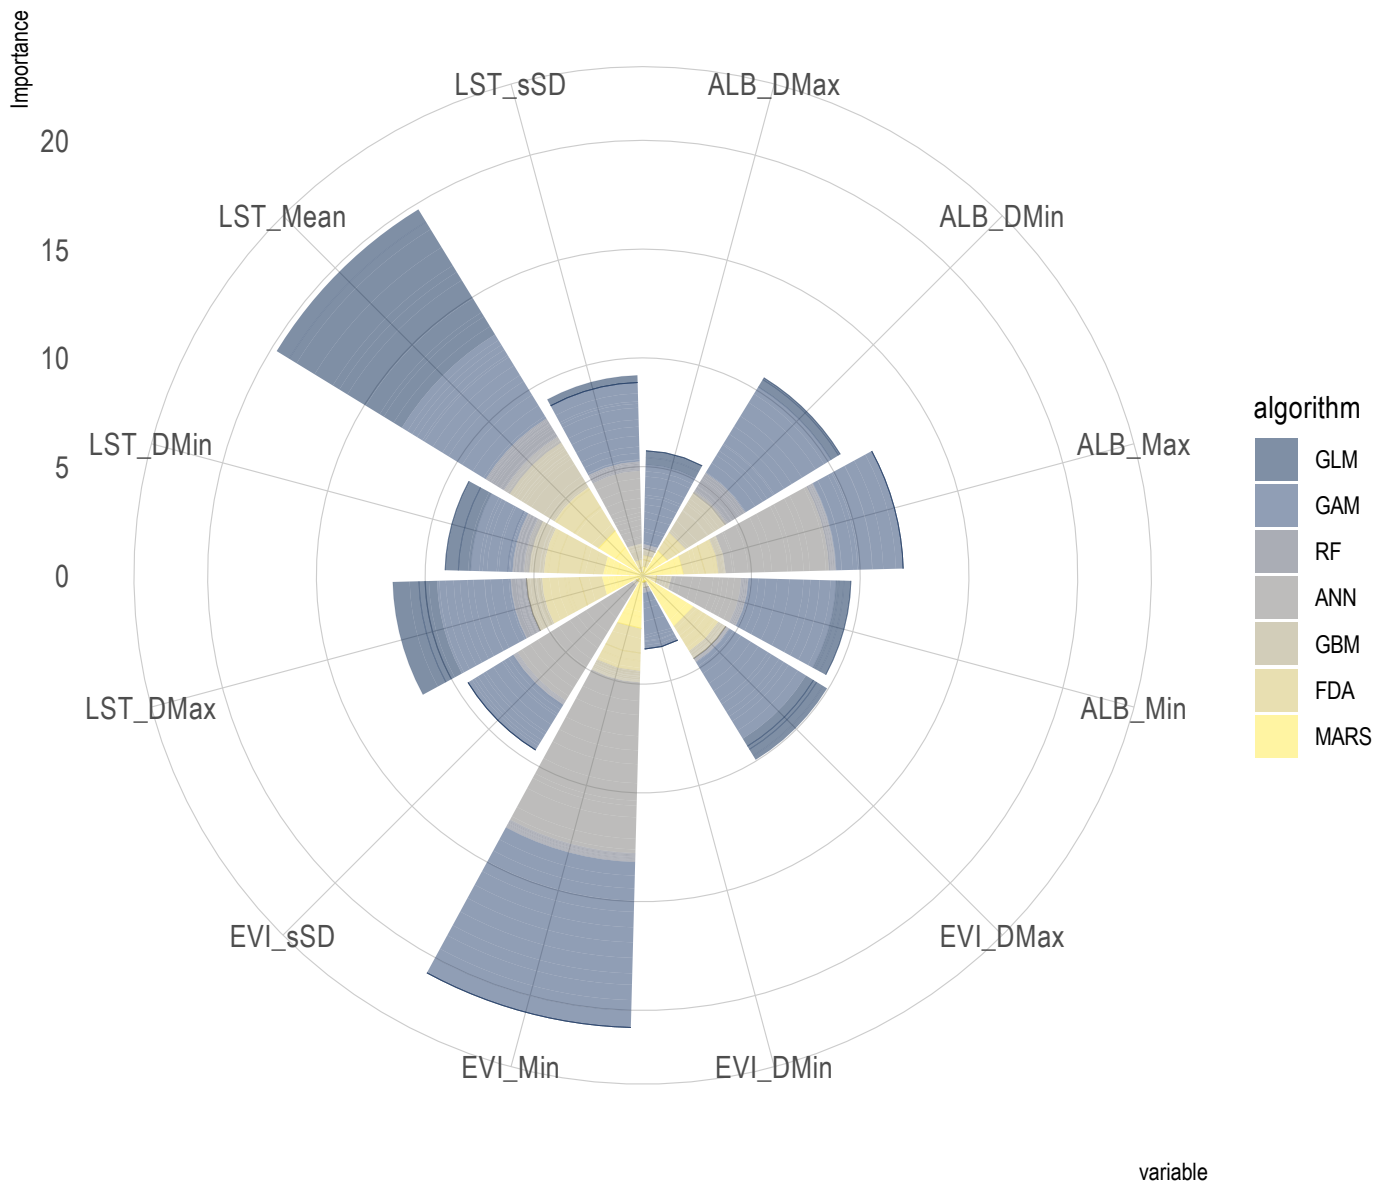

# Msaxat

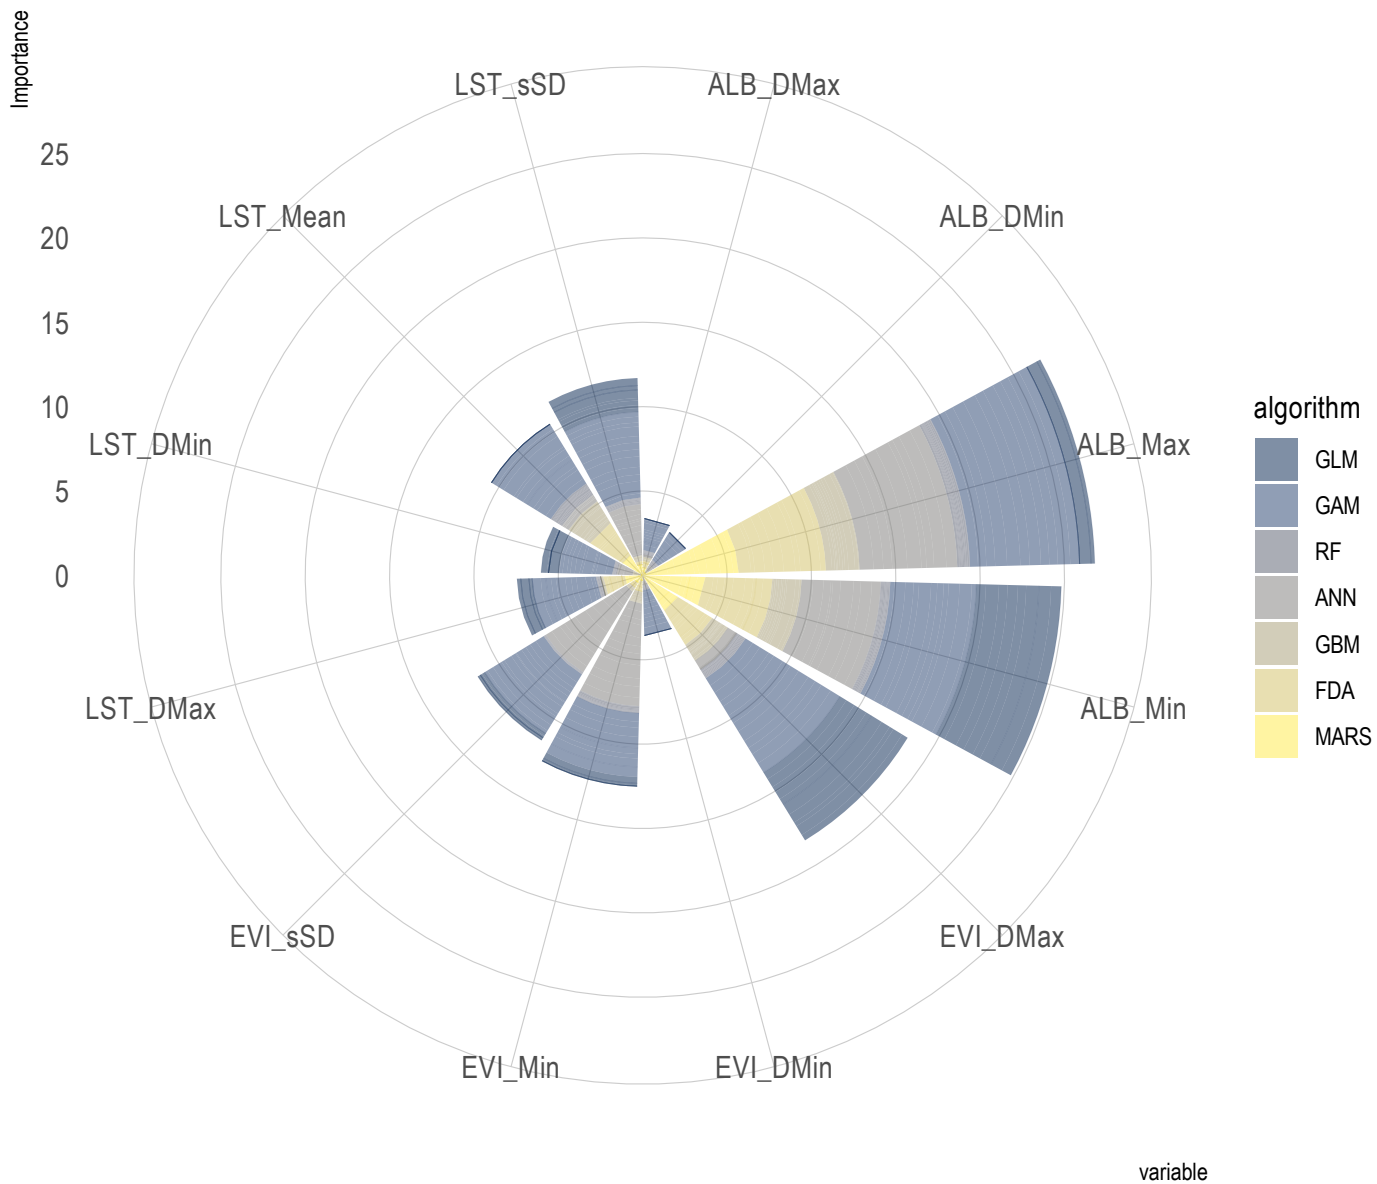

# Ooenan

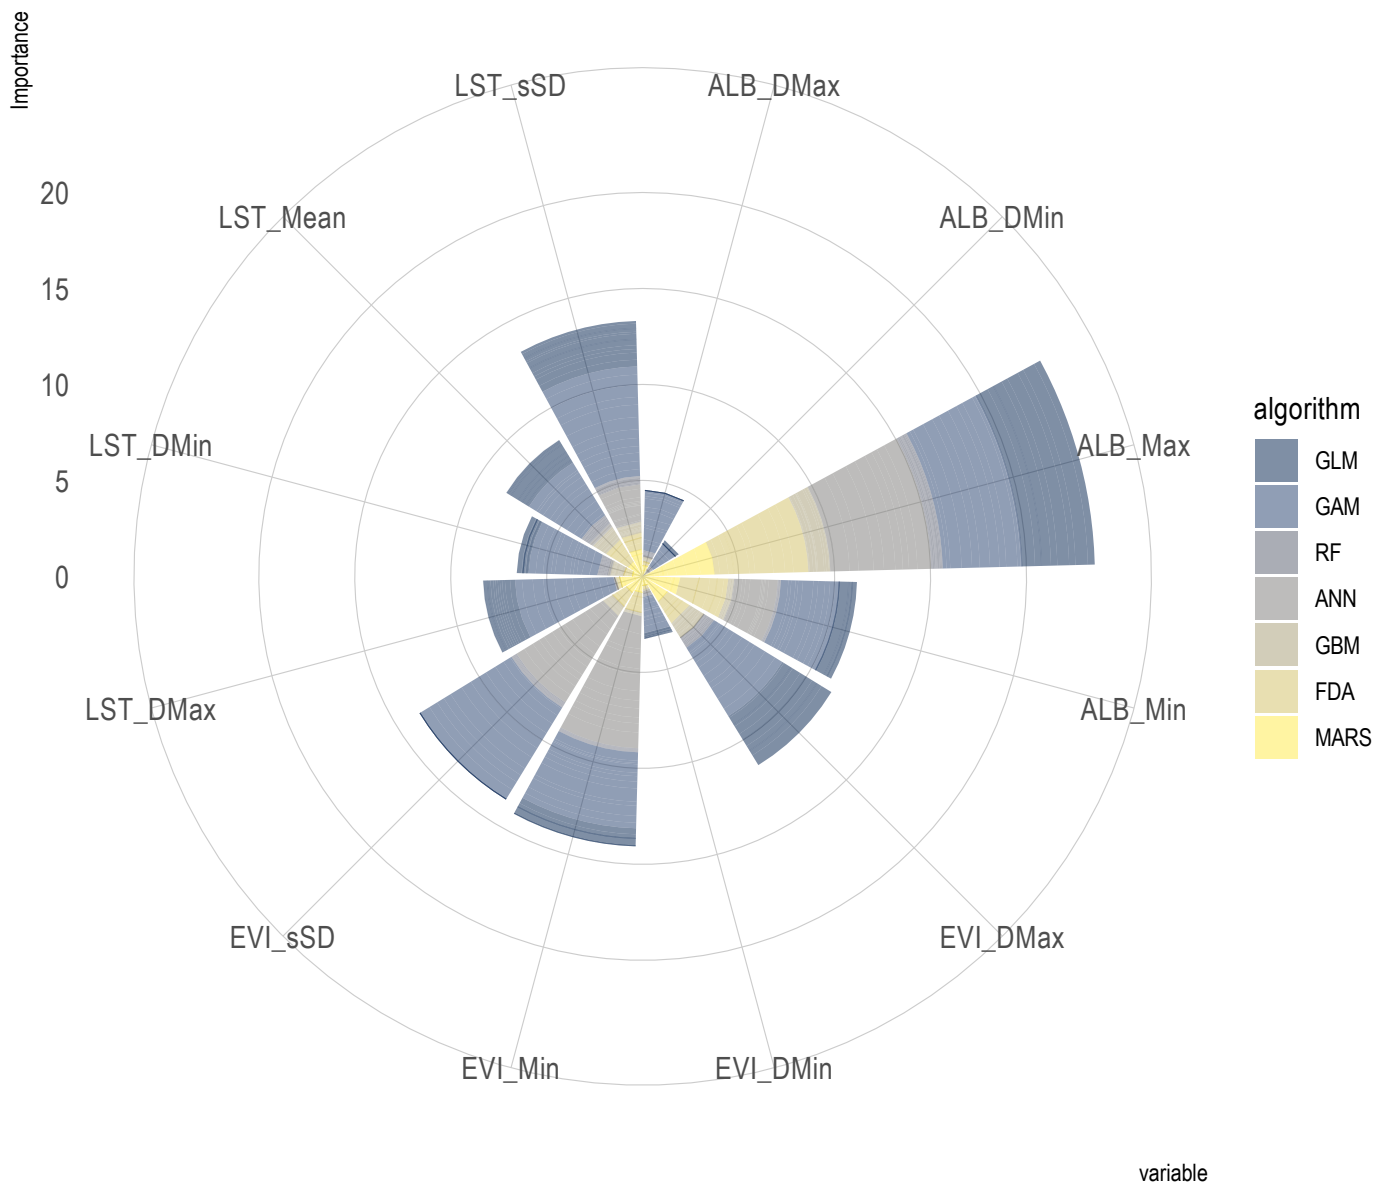

# Ooriolus

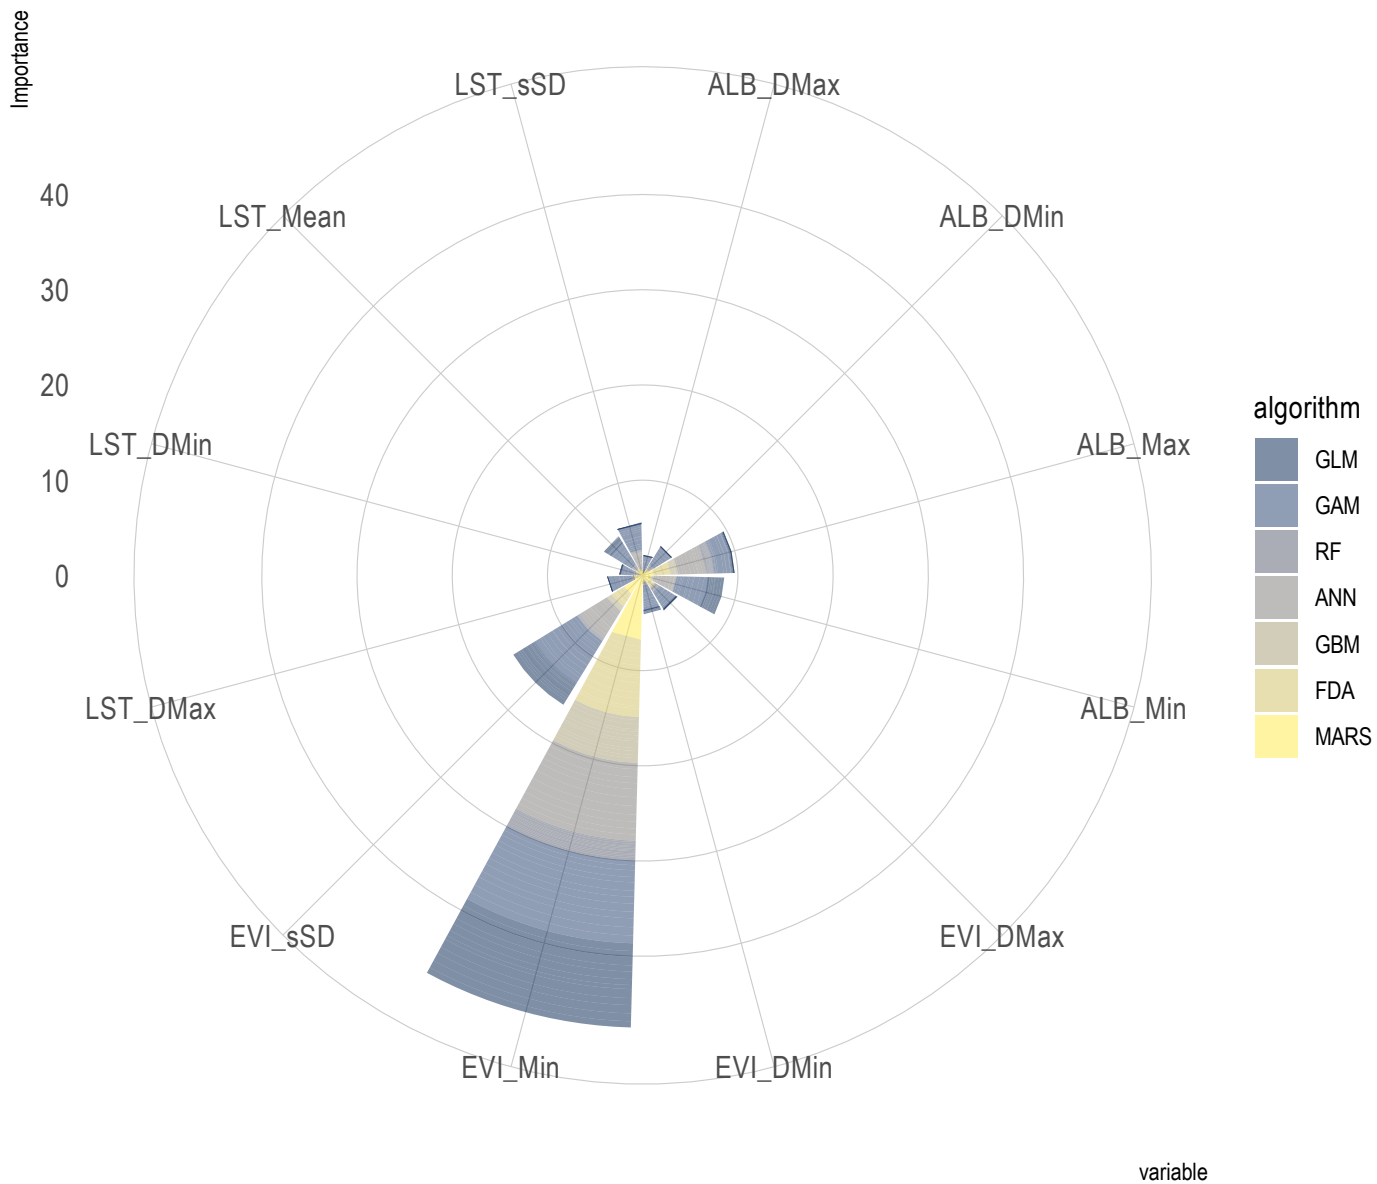

# Papiv

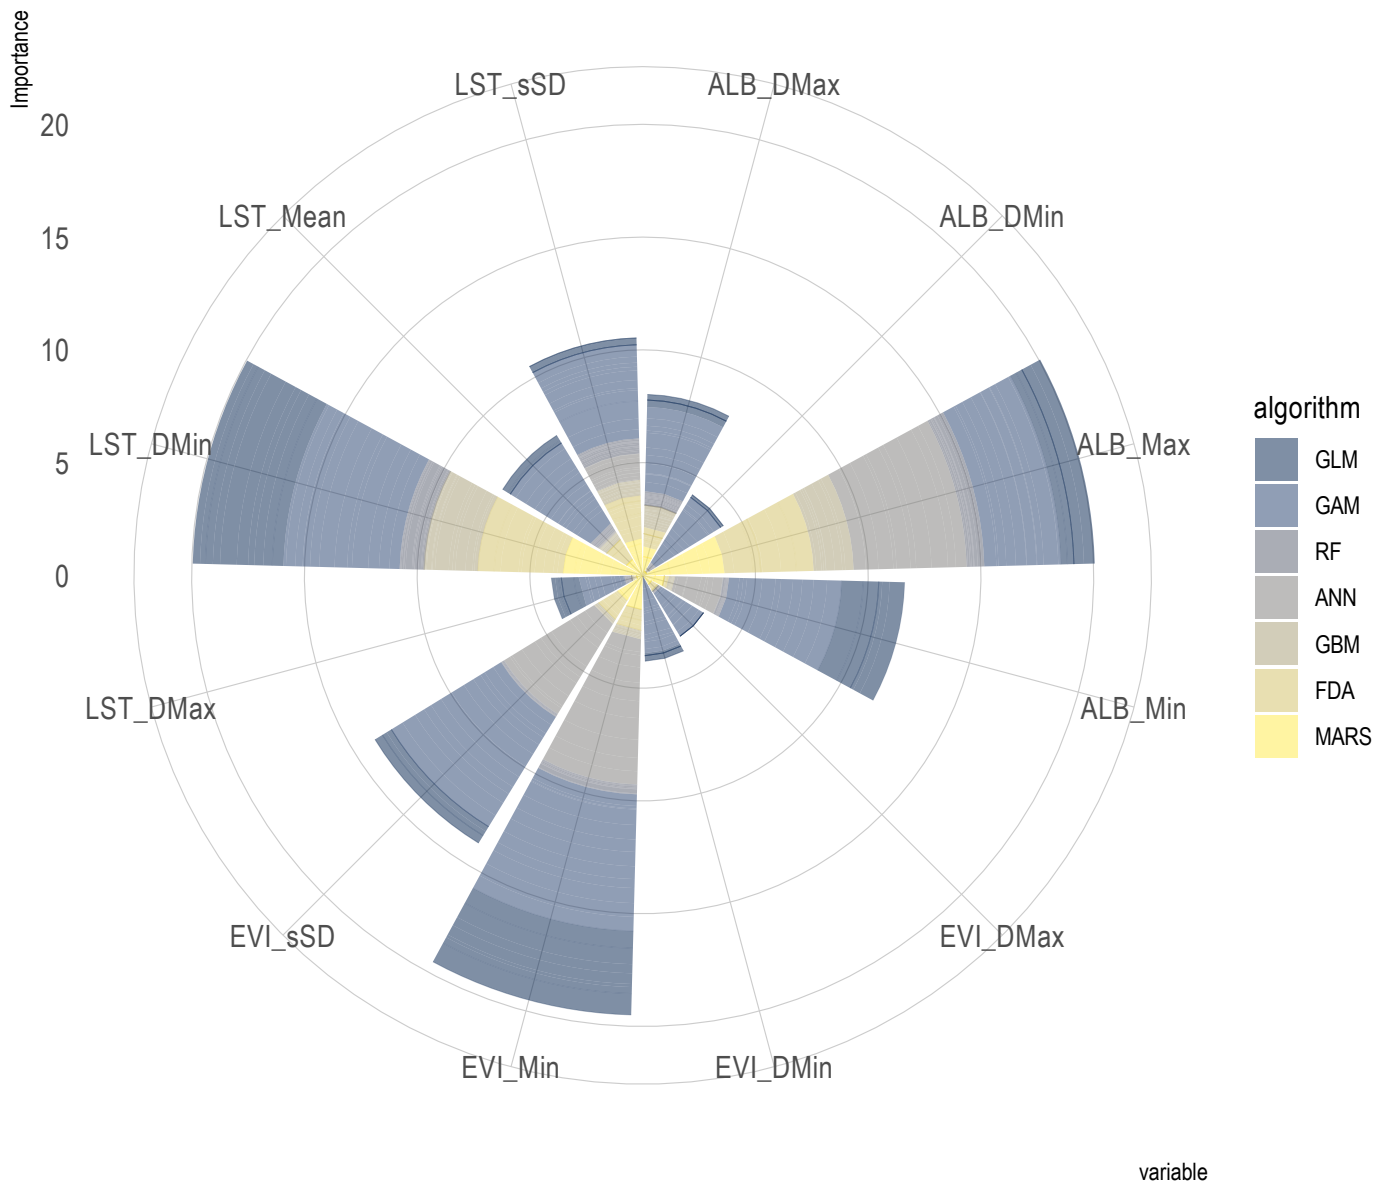

# Pater

Importance

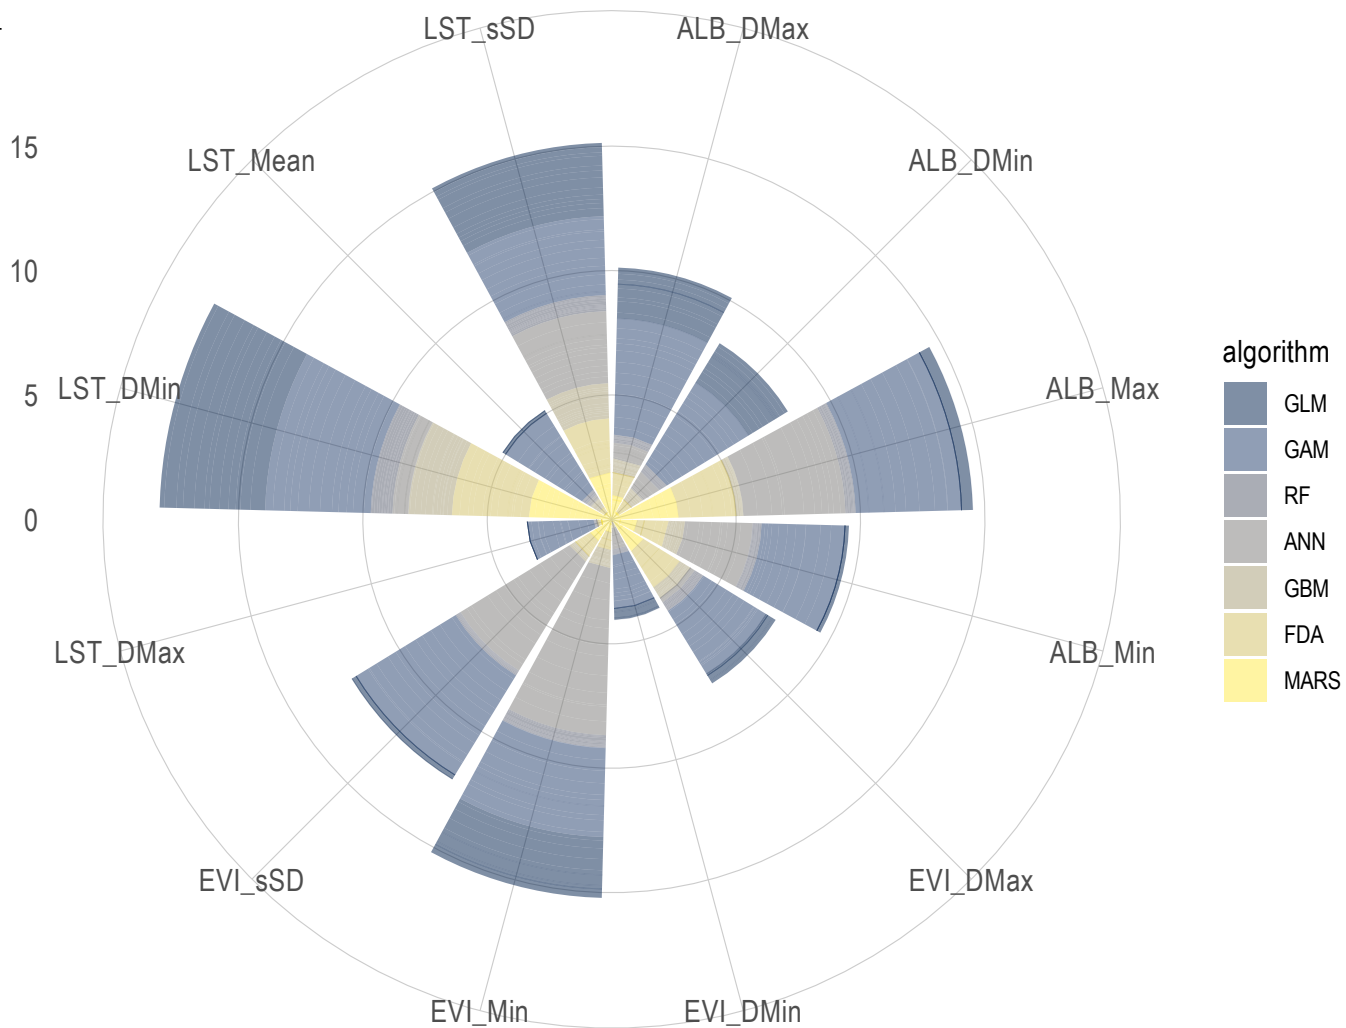

variable

# Pbonelli

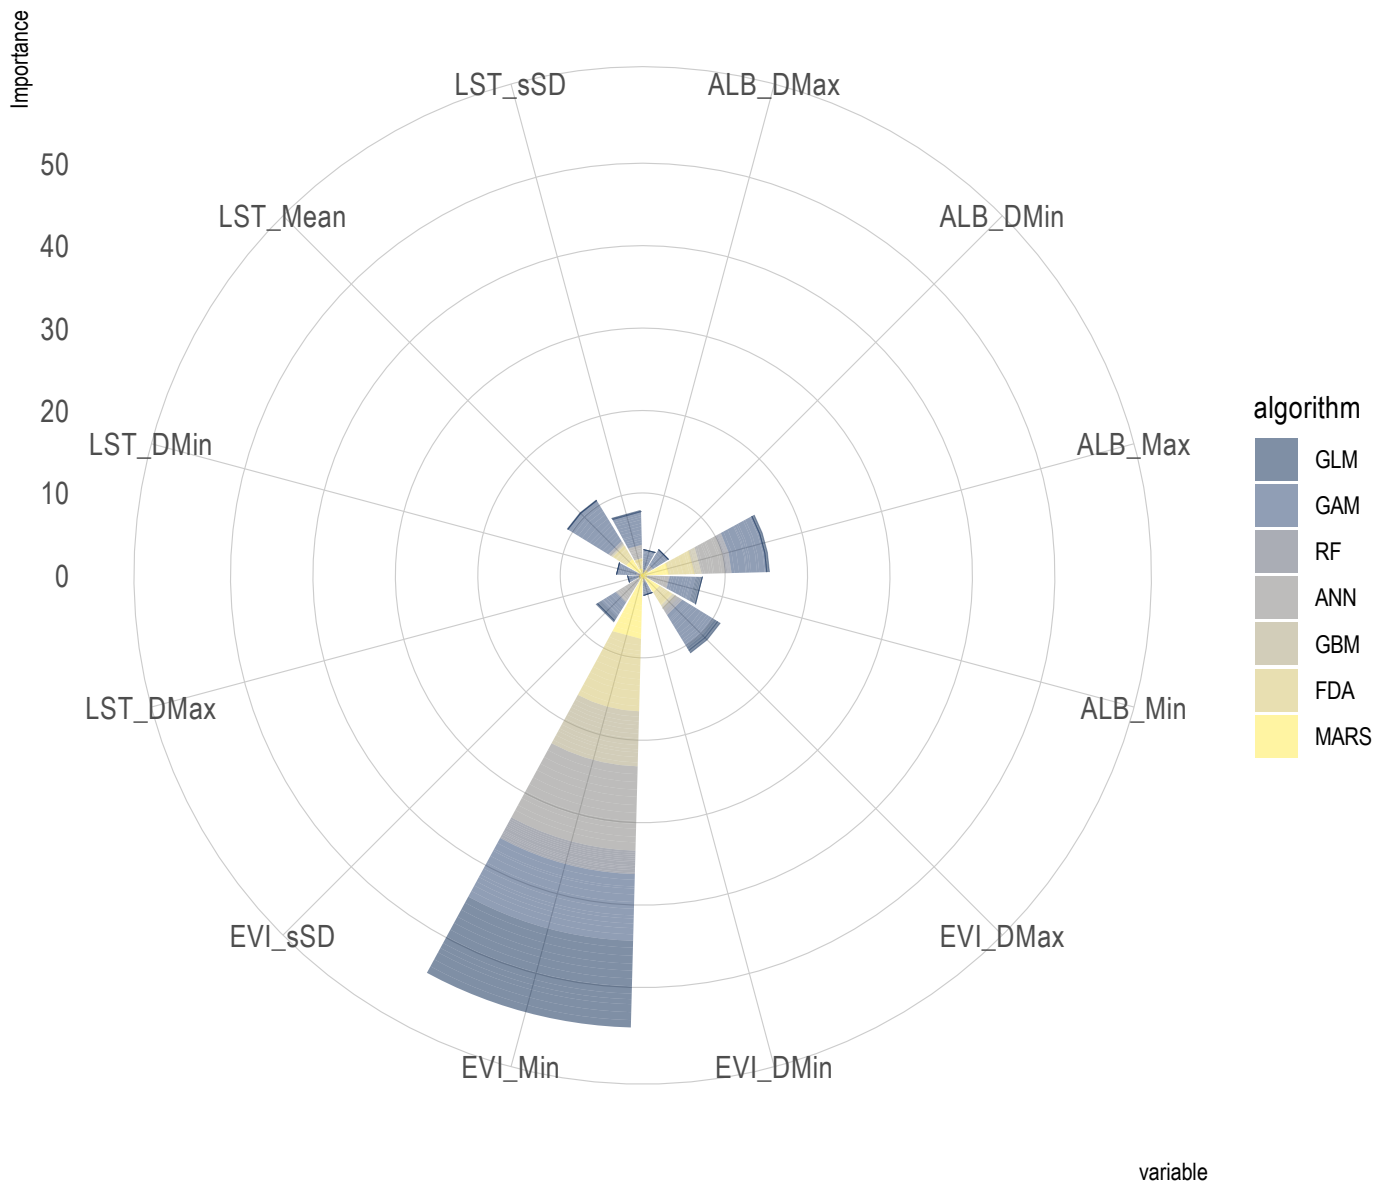

# Pcaer

Importance

30

20

10

0

LST\_sSD

ALB\_DMax

ALB\_DMin

ALB\_Max

ALB\_Min

EVI\_DMax

EVI\_DMin

EVI\_Min

EVI\_sSD

LST\_DMax

LST\_DMin

LST\_Mean

algorithm



variable

# Pcollyb

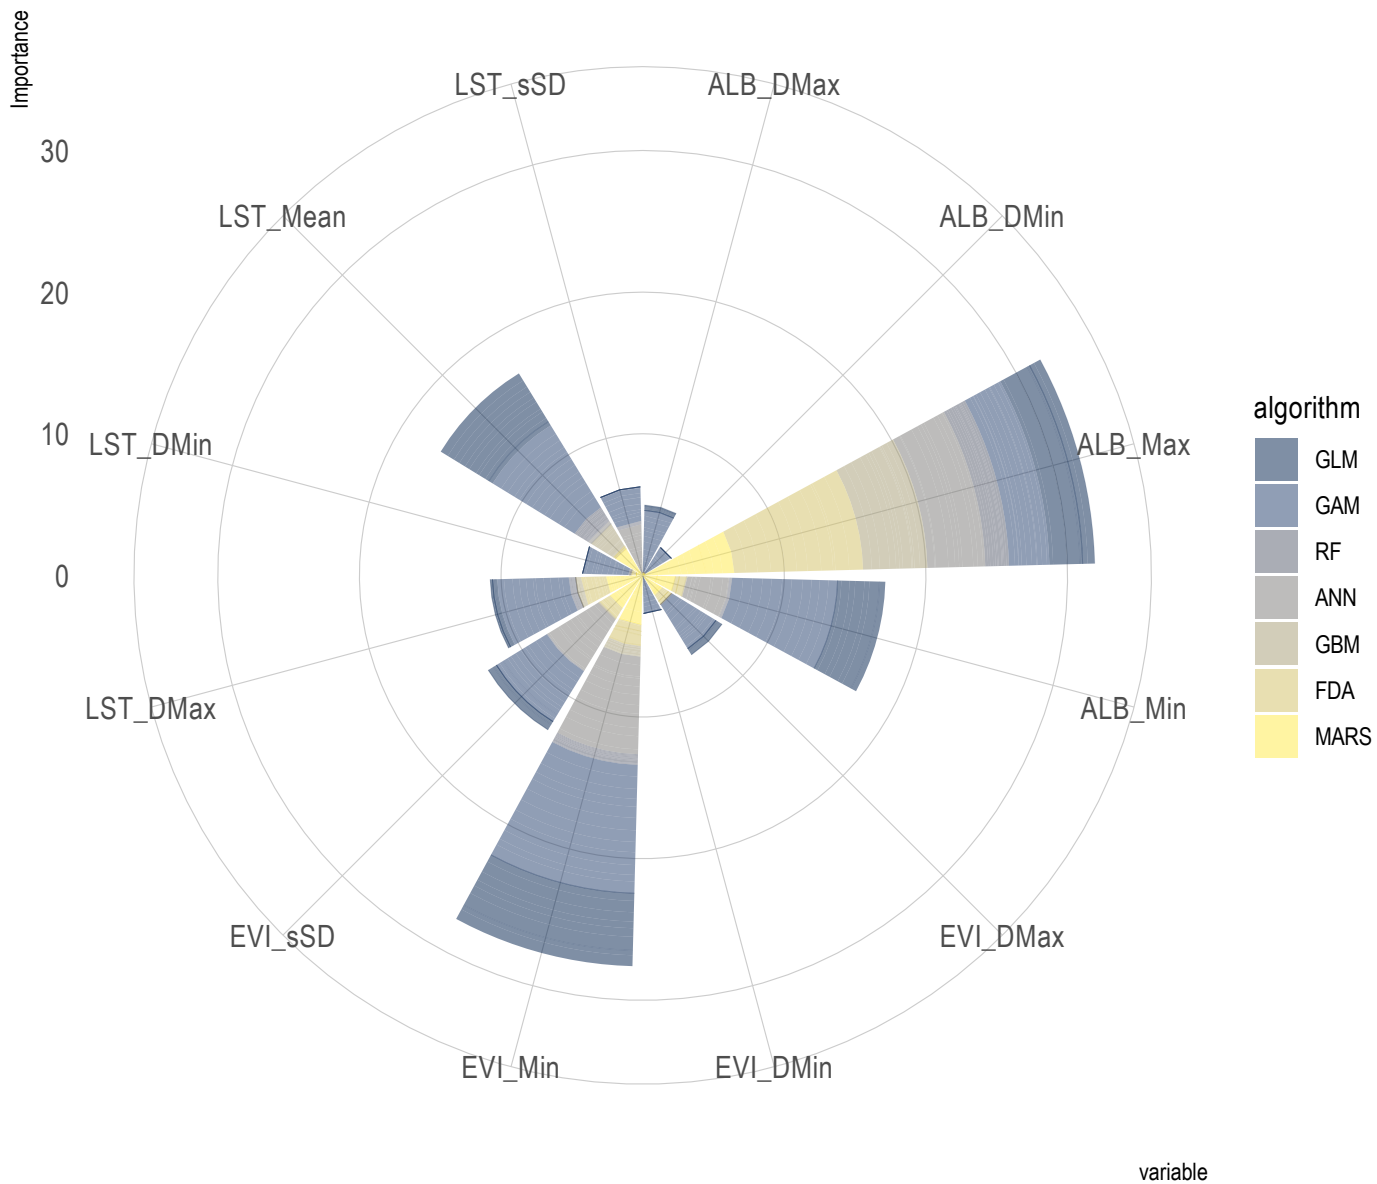

# Pcrist

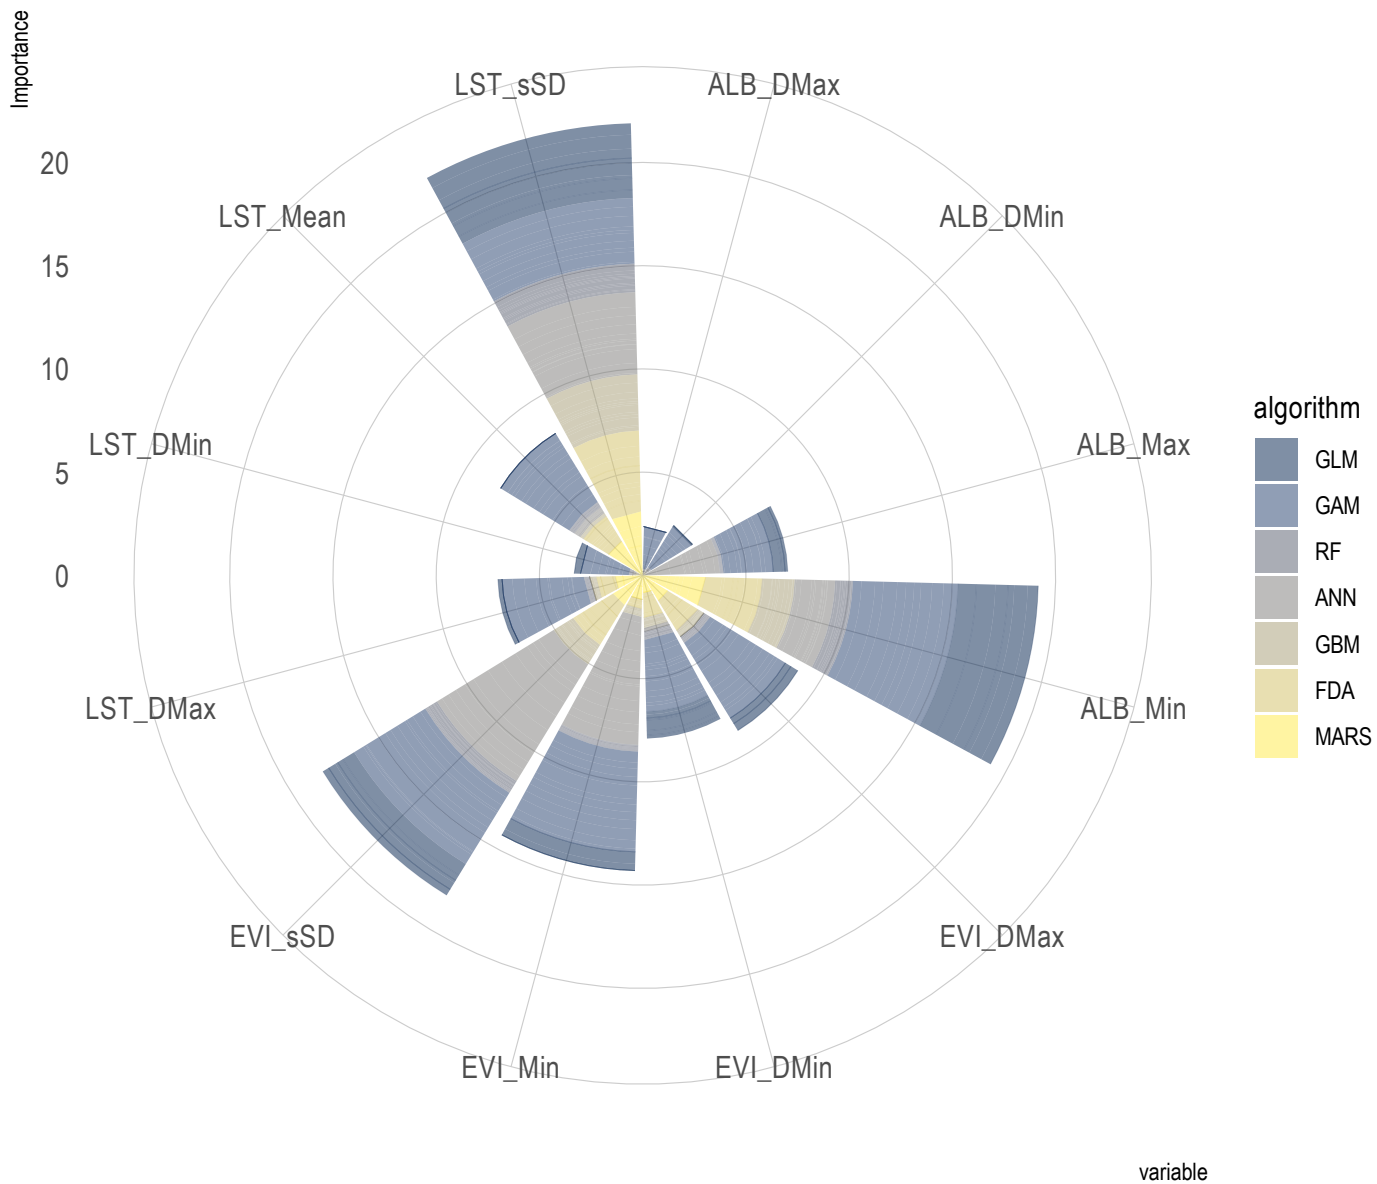

# Pdom

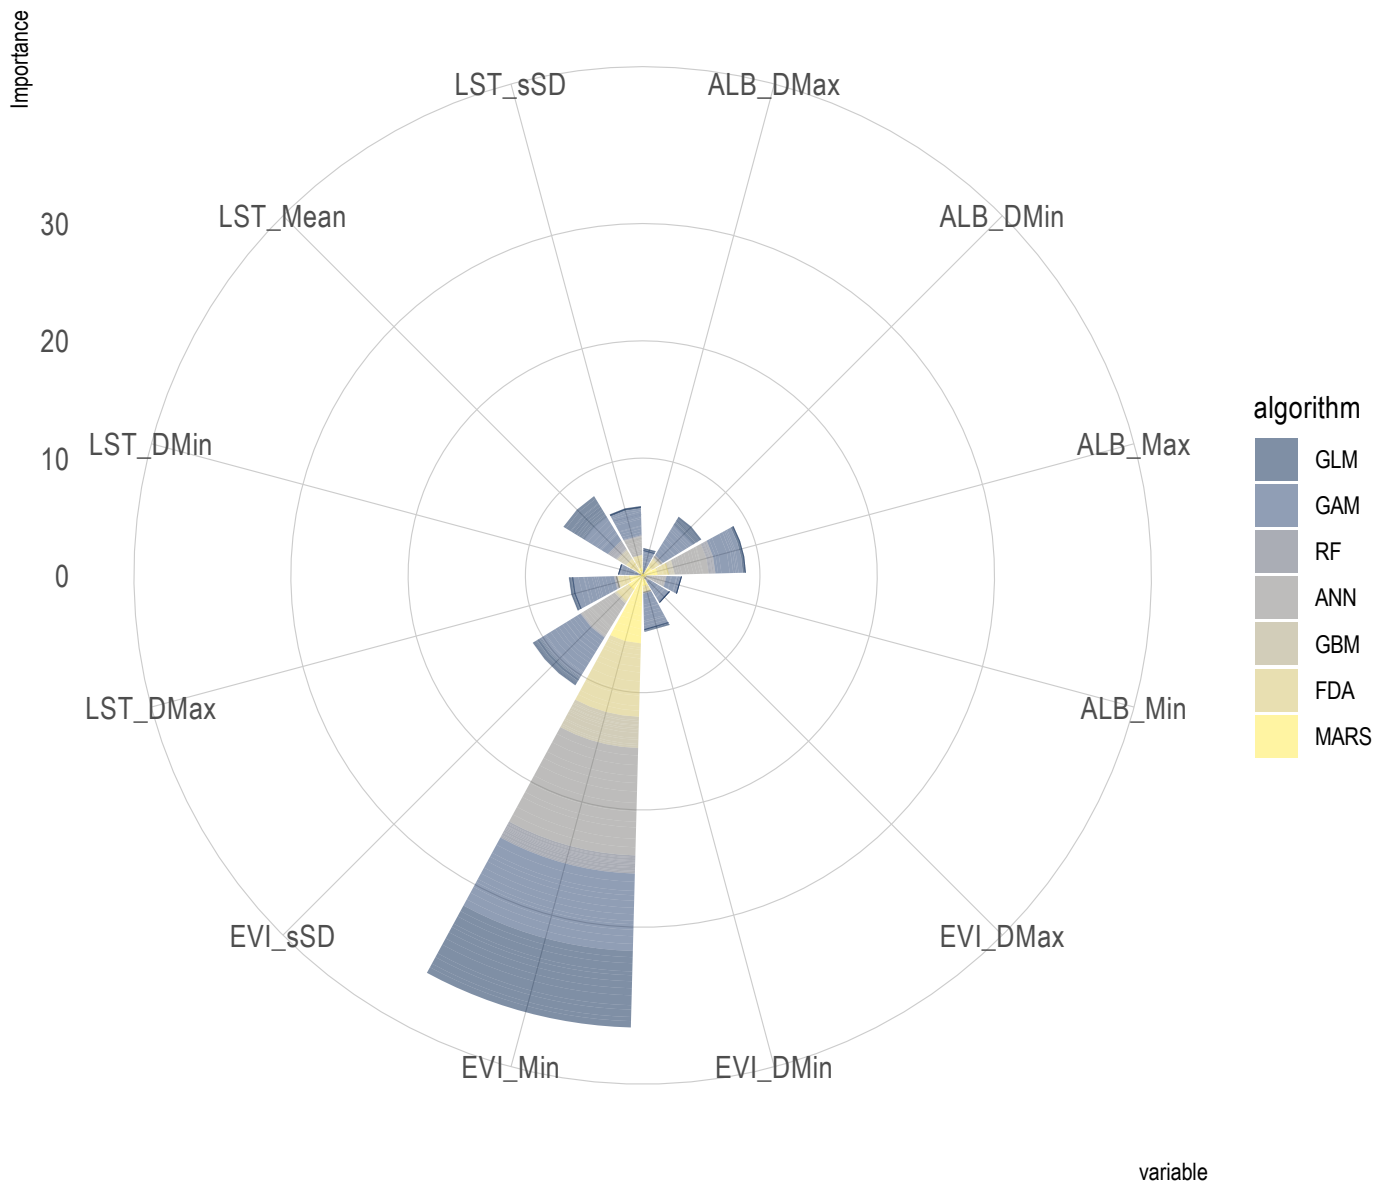

# Pibericus

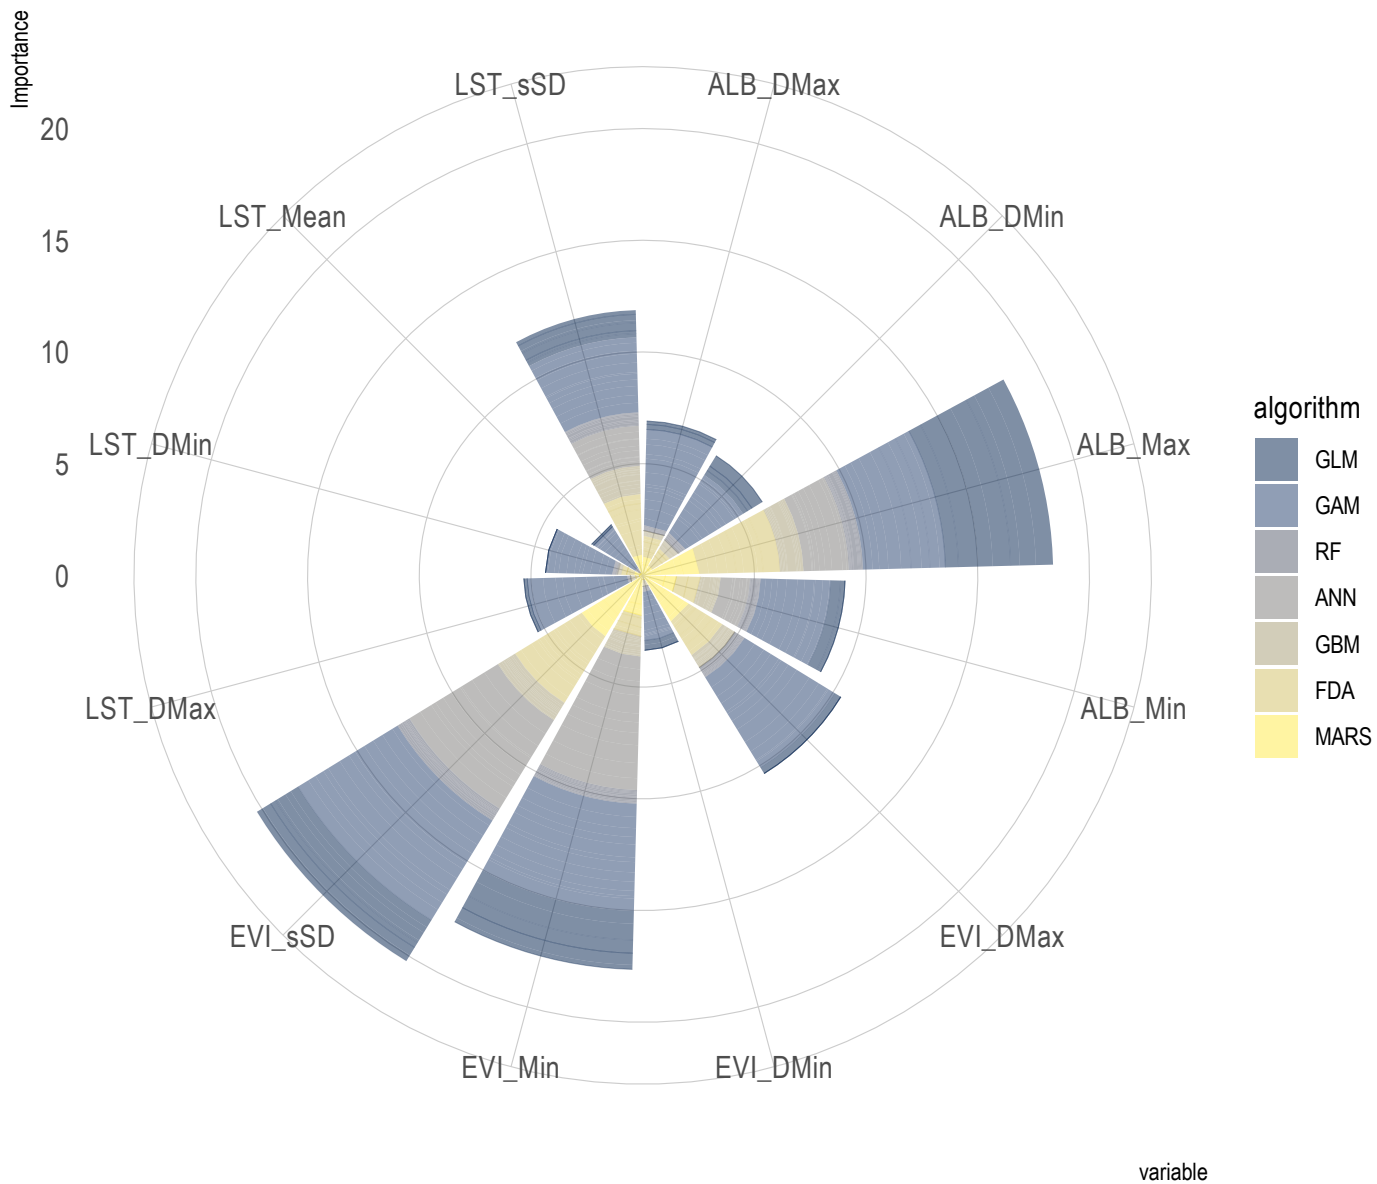

# Picapica

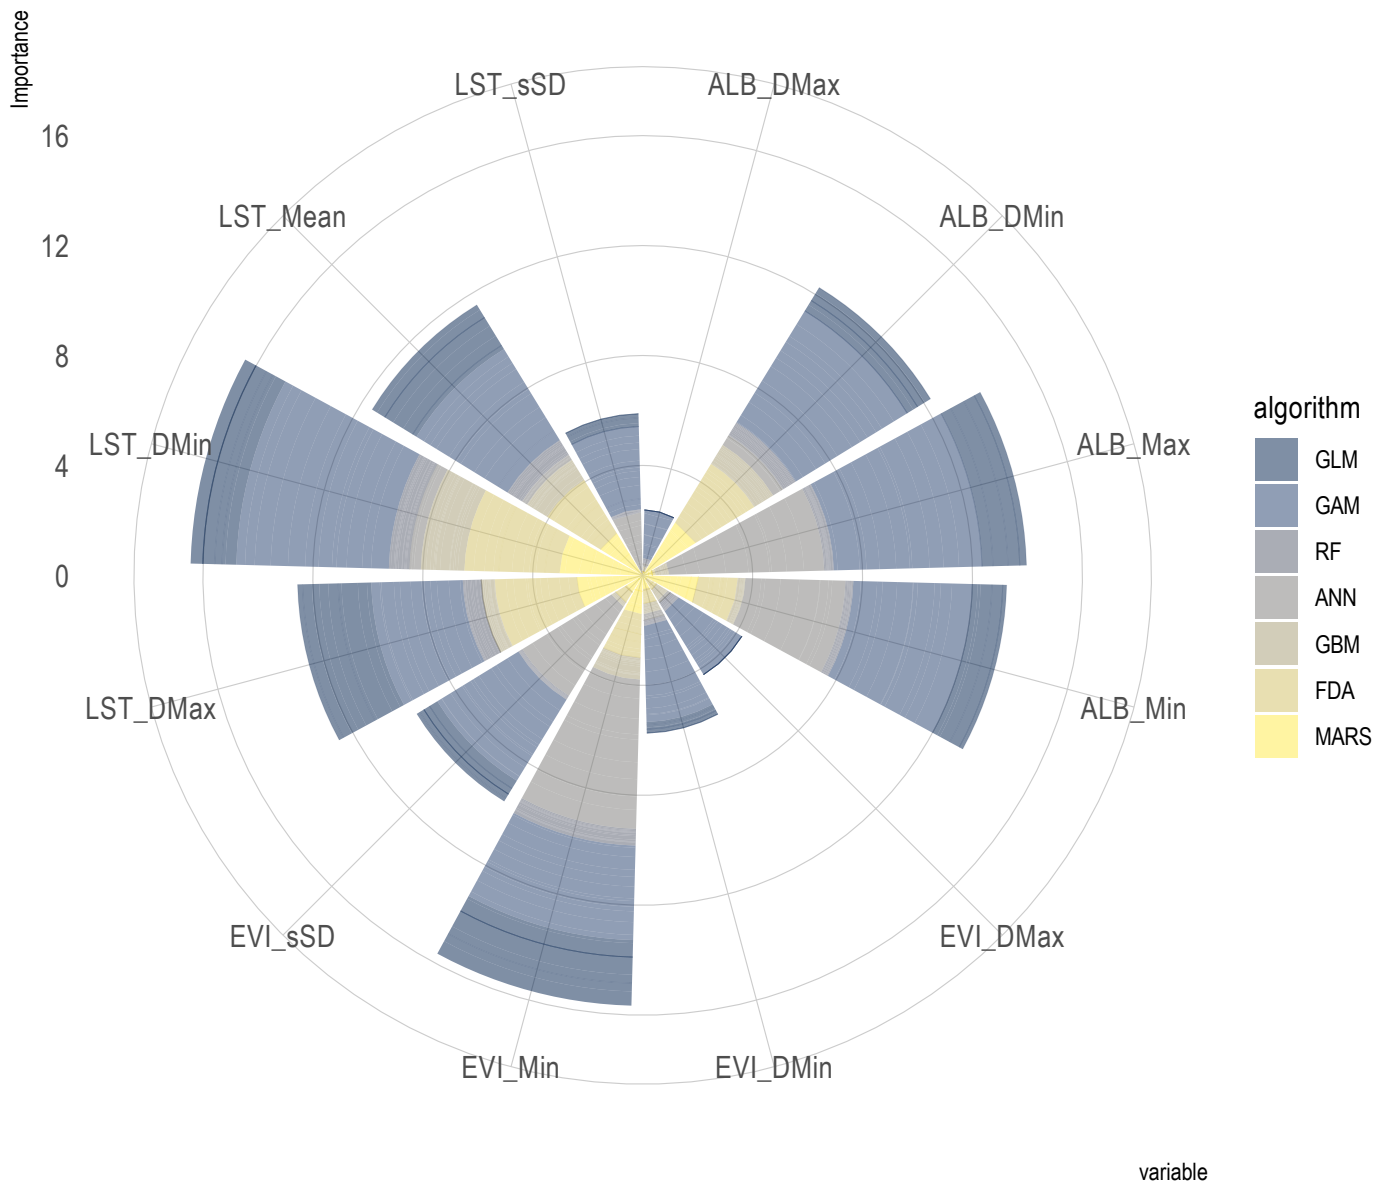

# Pmajor

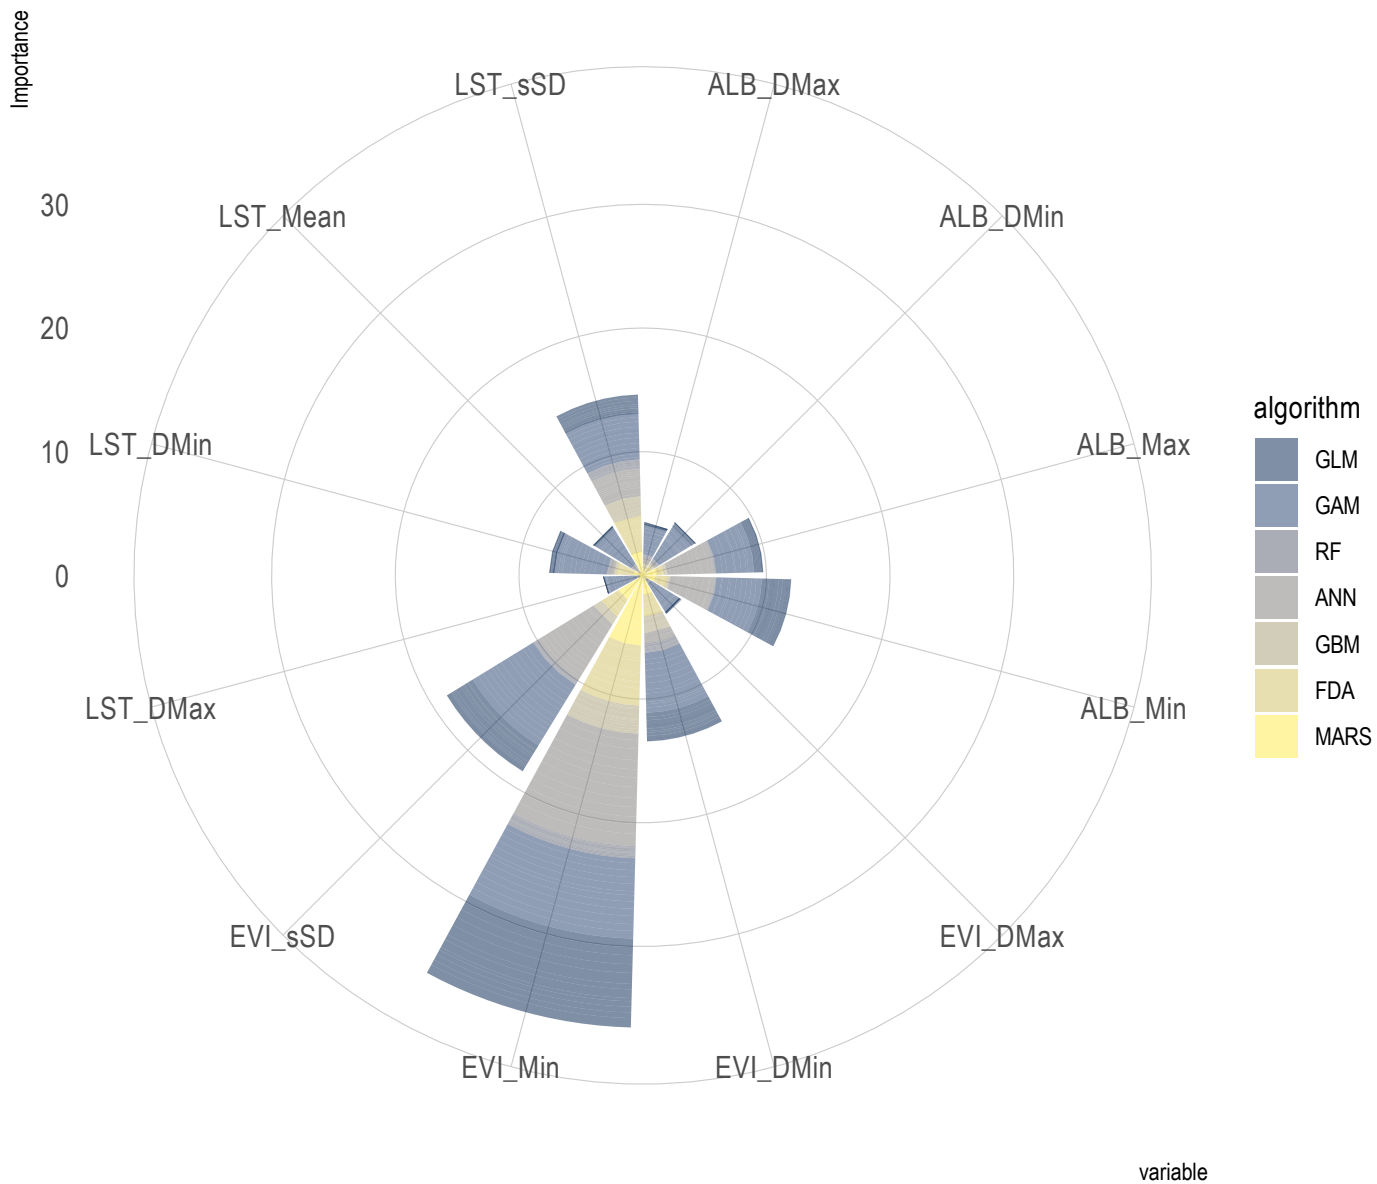

# Pmodul

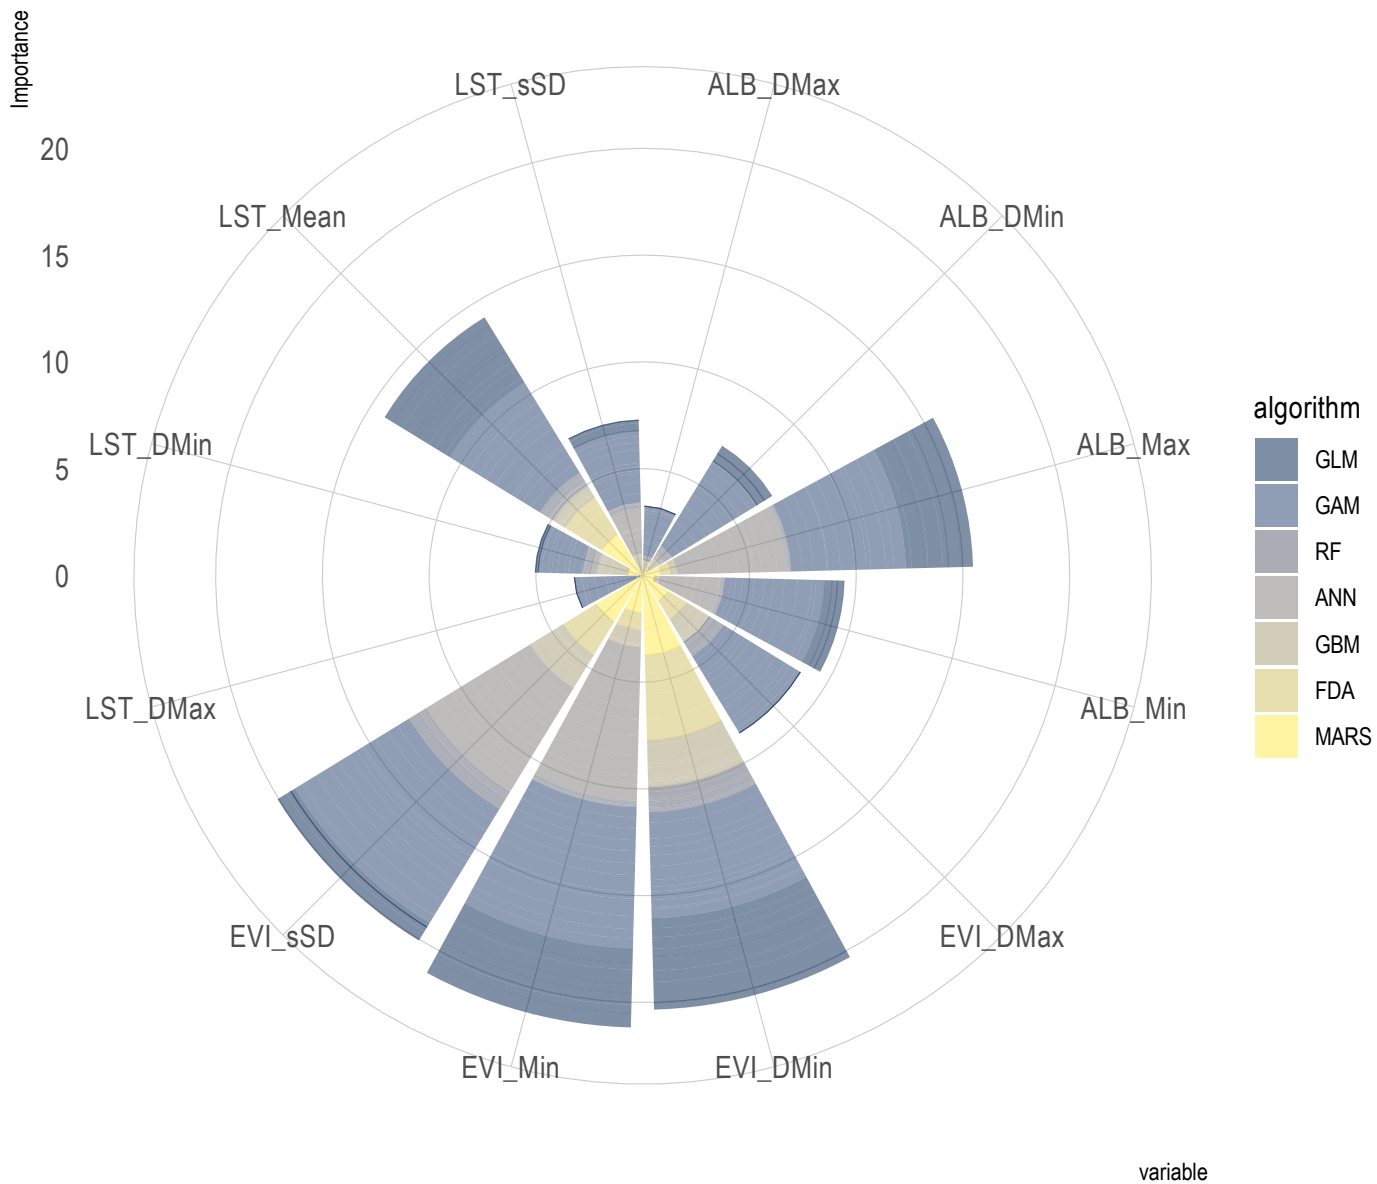

# Pphoenic

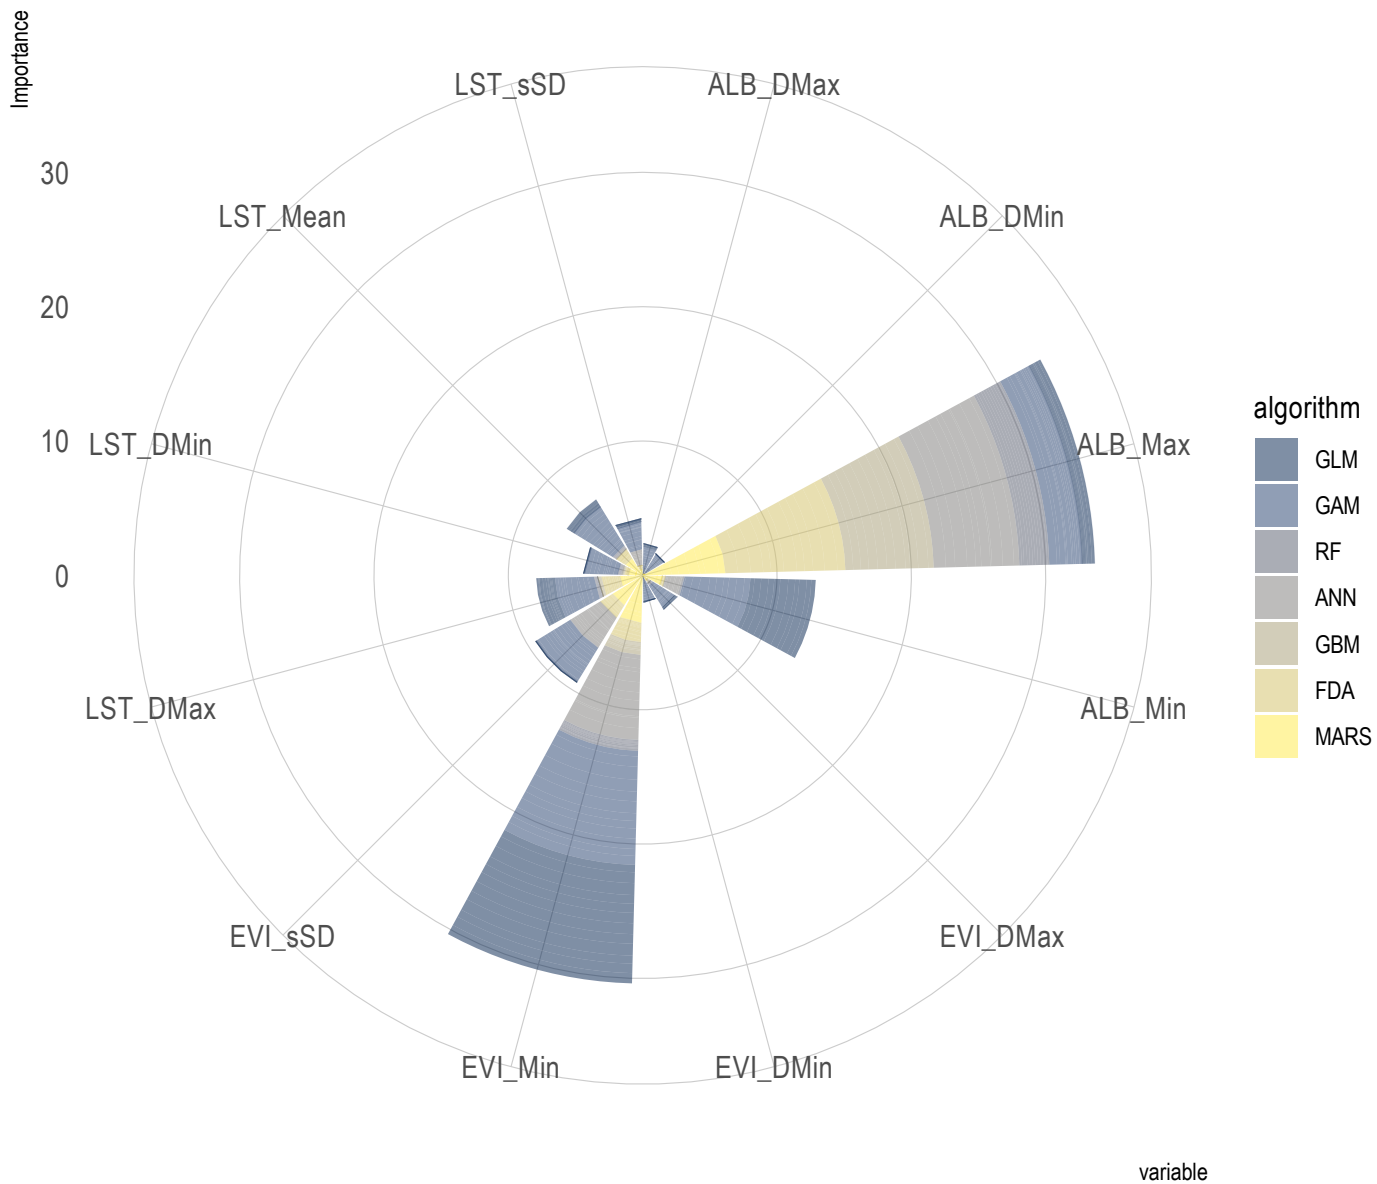

Ppyrr

Importance

20

10

0

LST\_sSD

ALB\_DMax

ALB\_DMin

LST\_Mean

LST\_DMin

ALB\_Max

LST\_DMax

ALB\_Min

EVI\_sSD

EVI\_DMax

EVI\_Min

EVI\_DMin

variable

algorithm

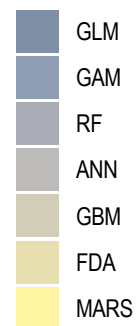

## Prupest

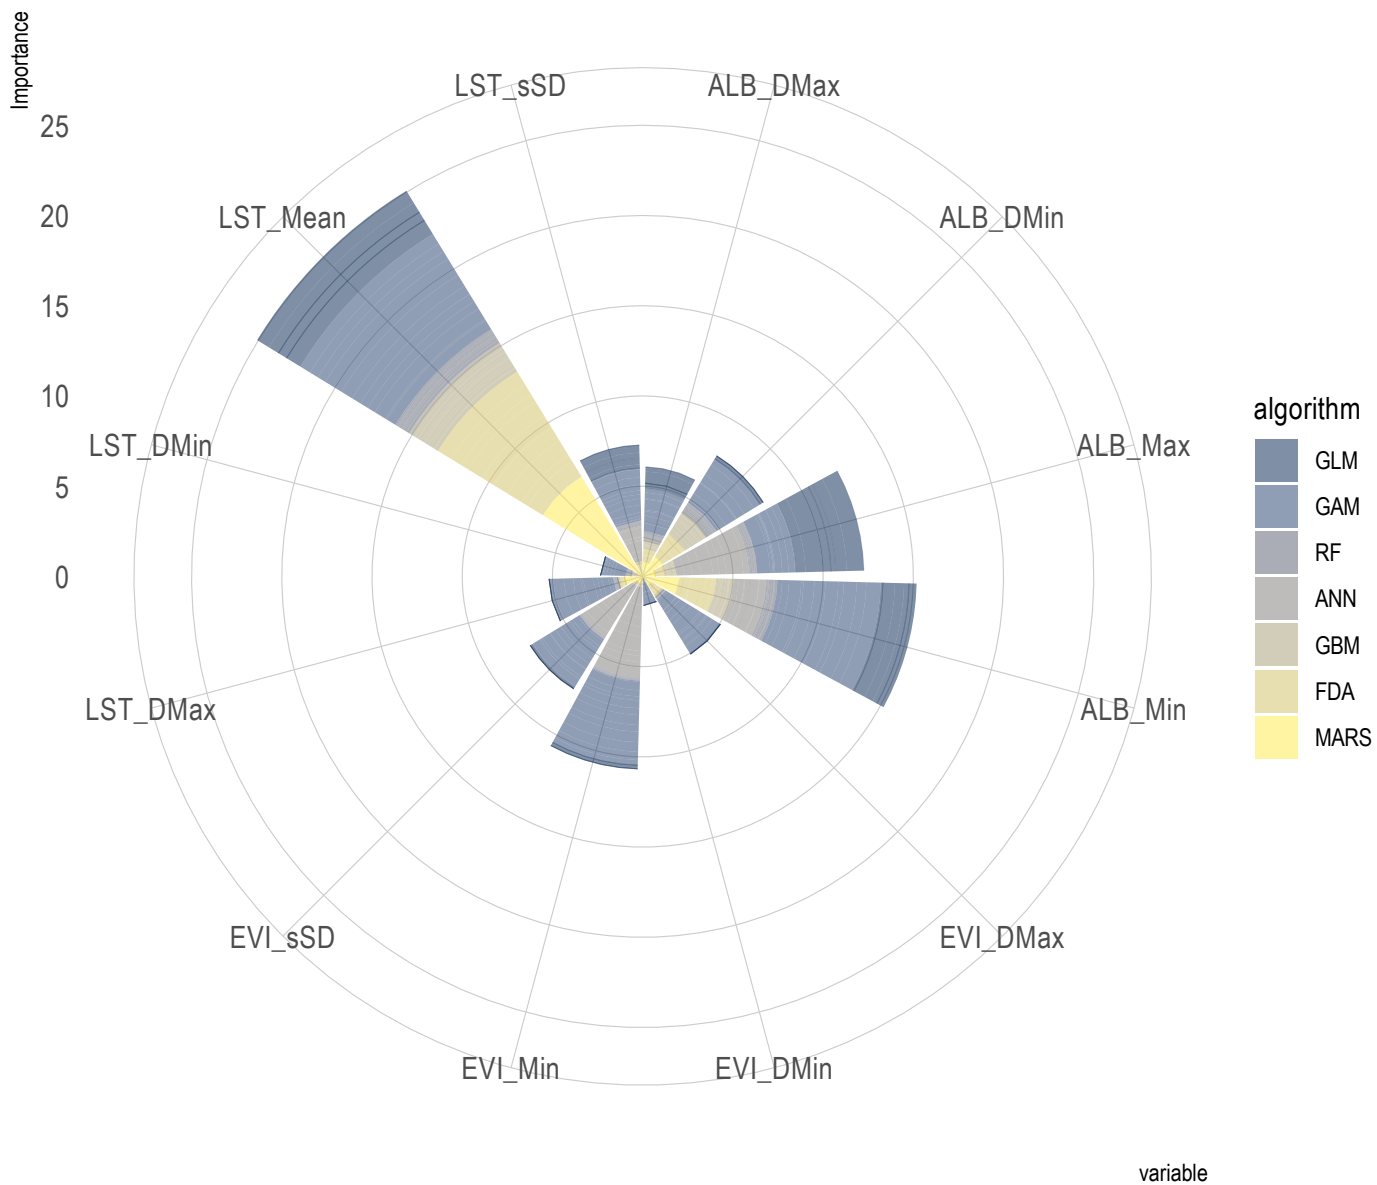

# Pviridis

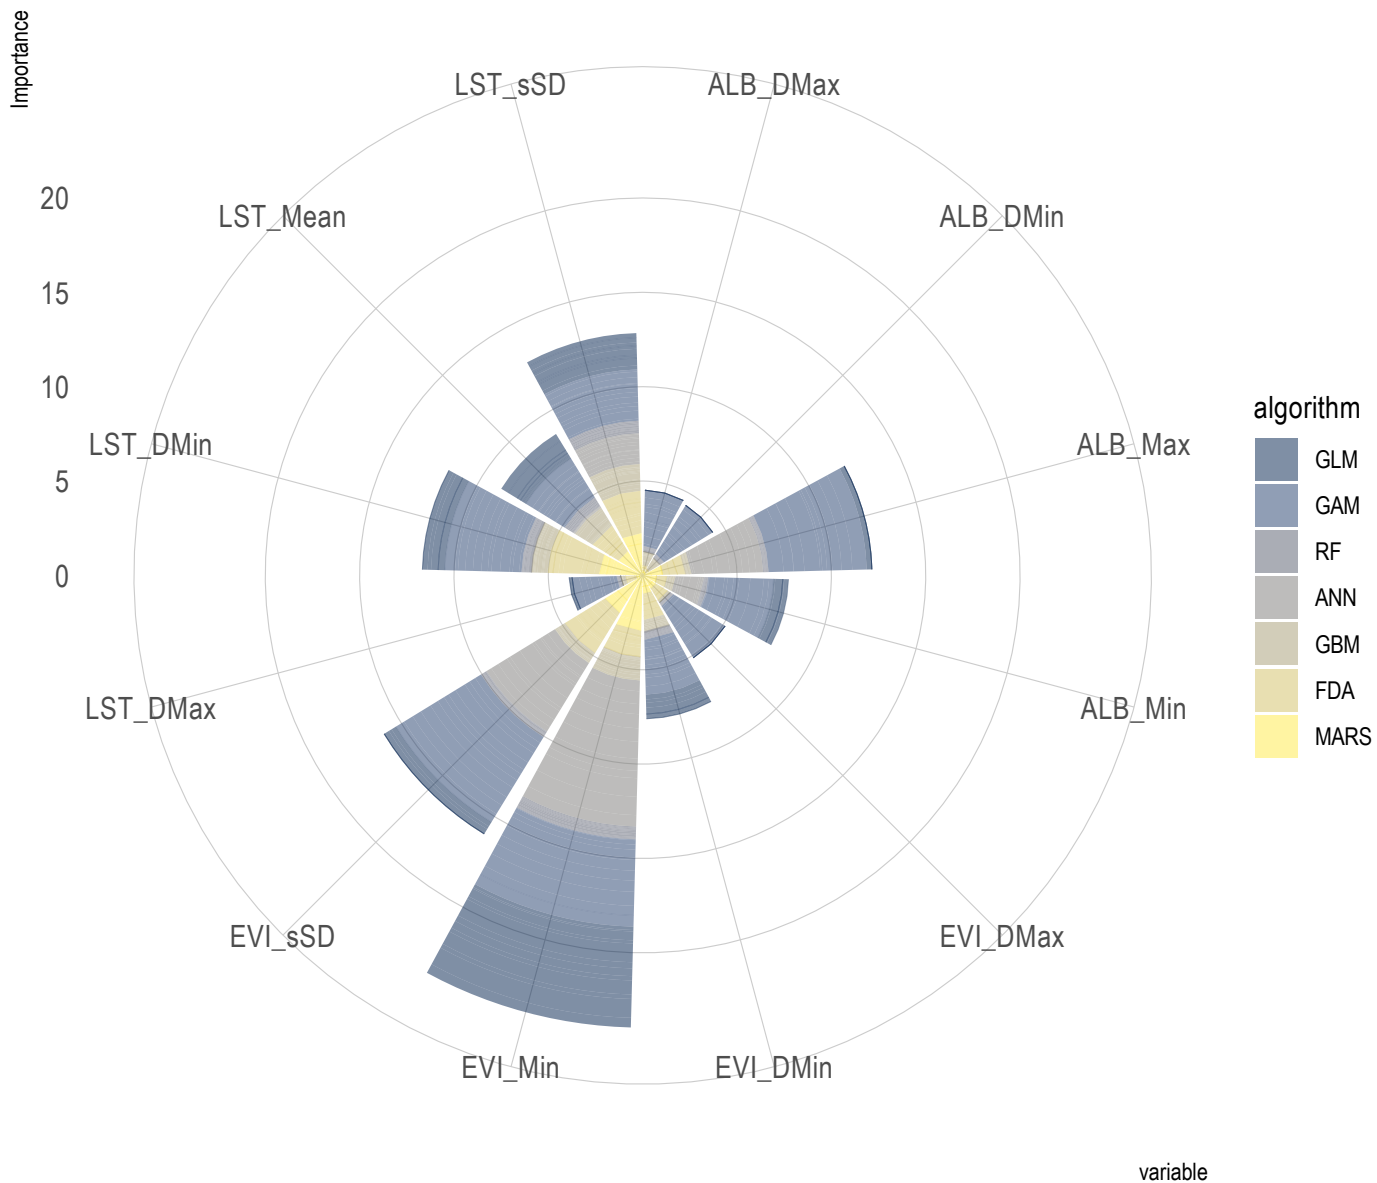

# Rignic

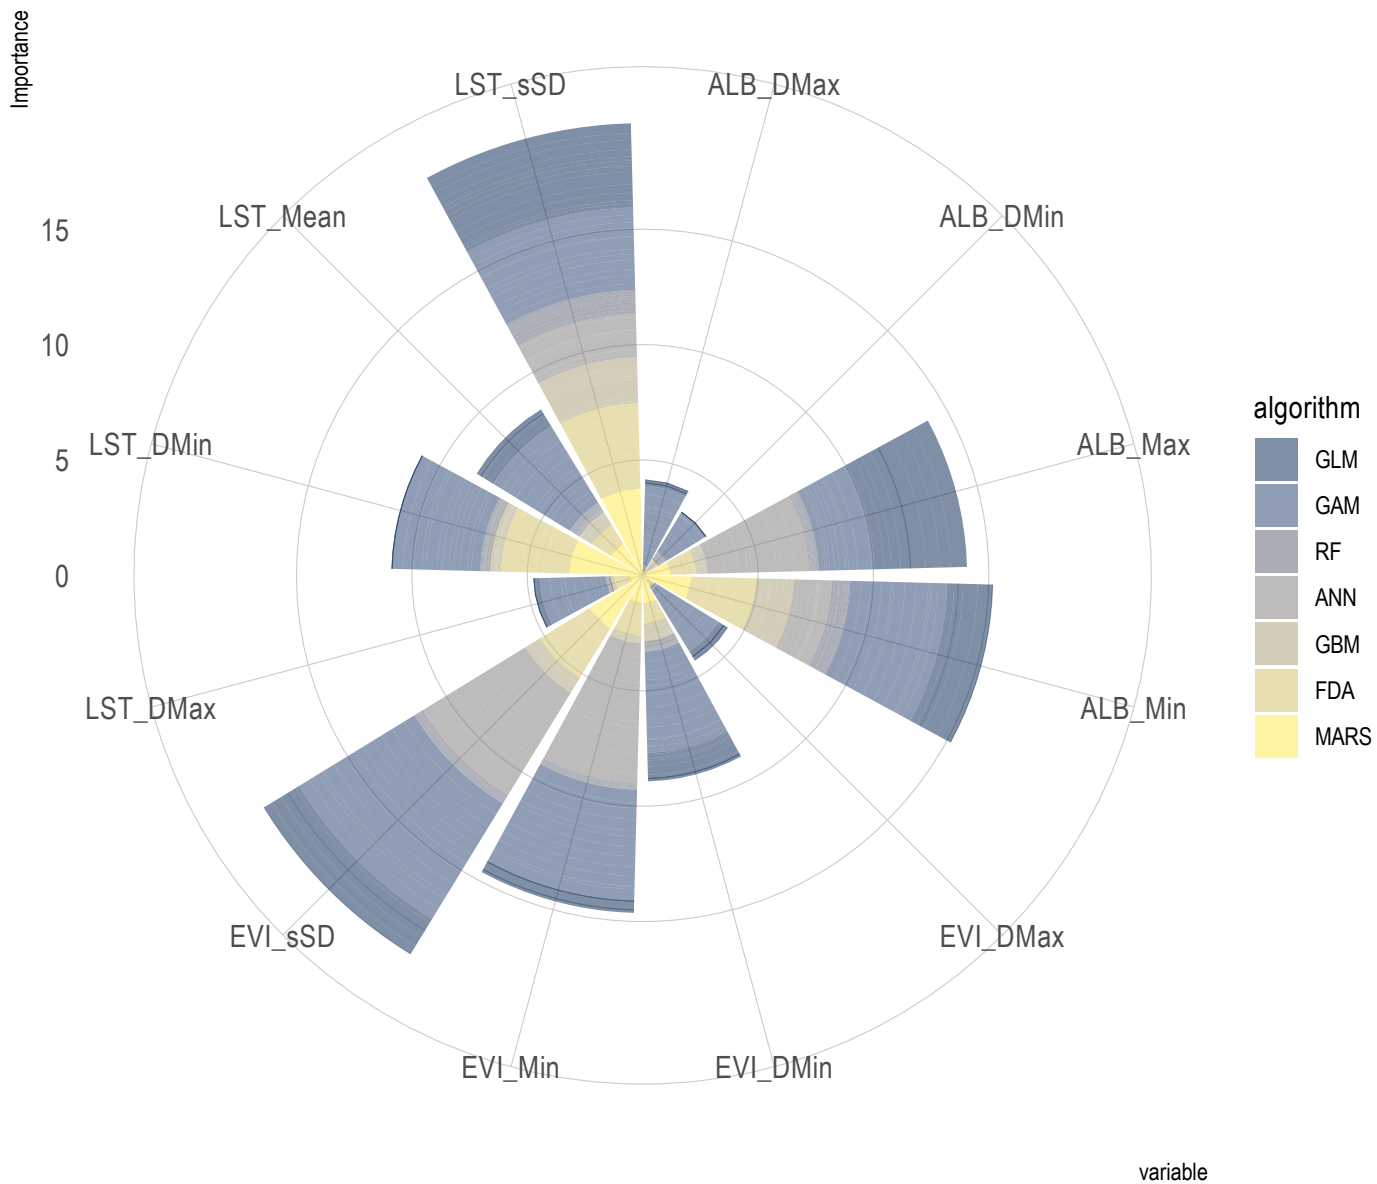

# Satric

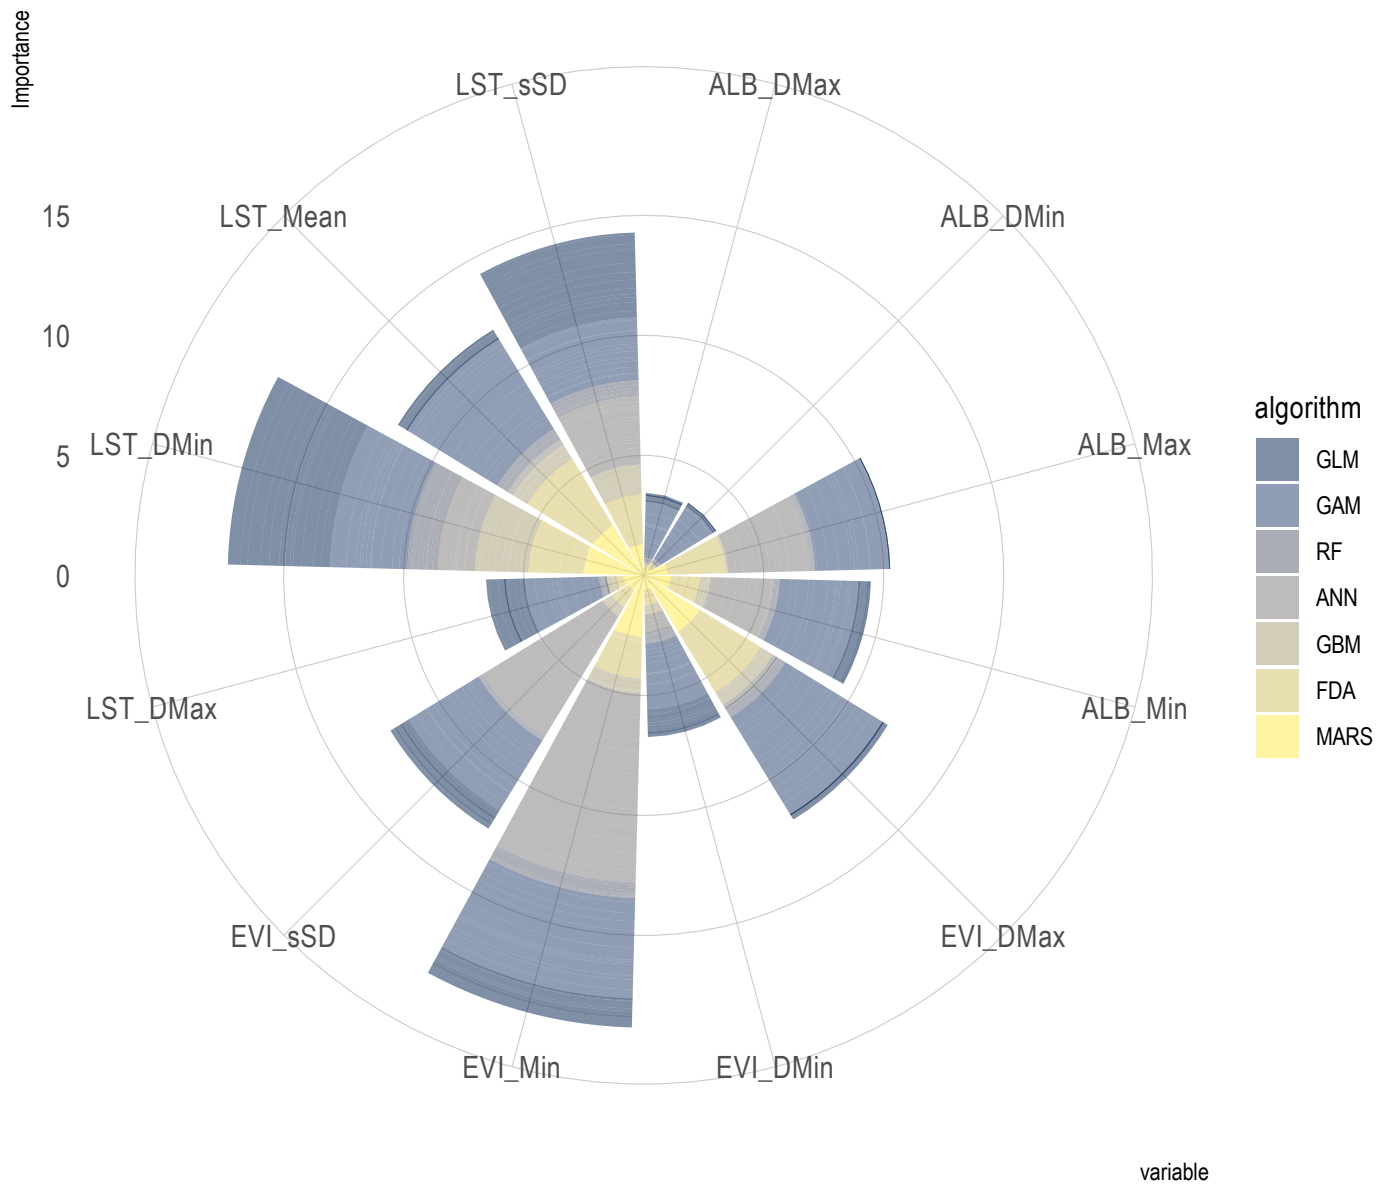

# Scantill

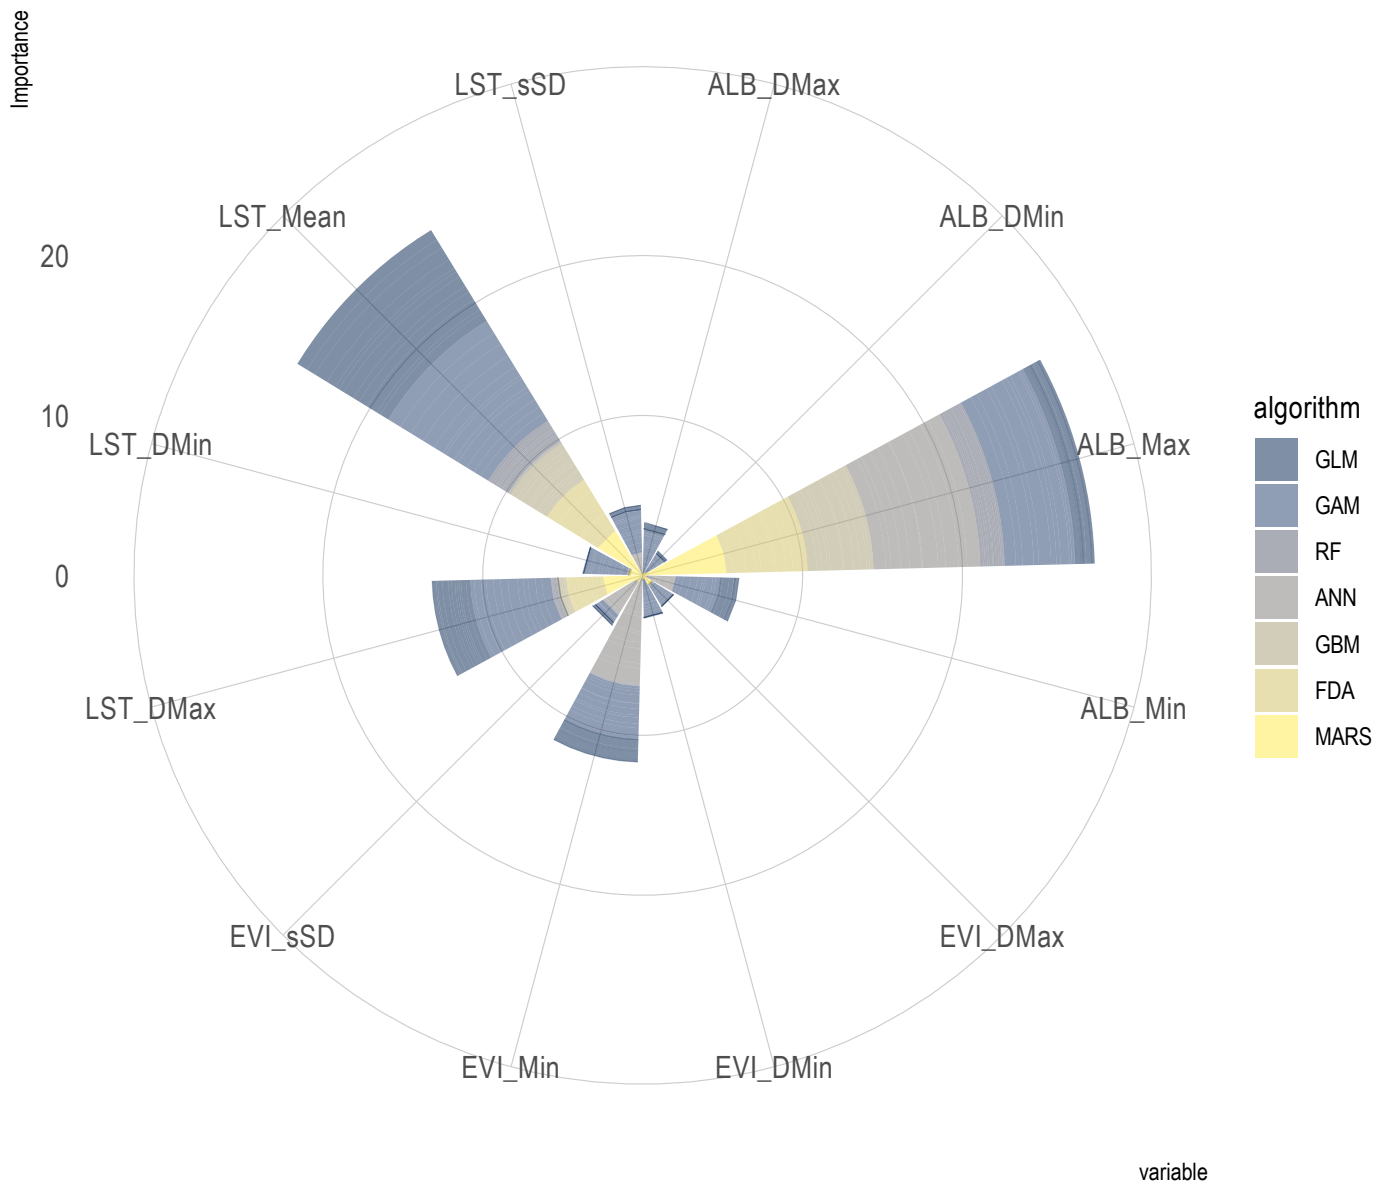

# Scom

Importance

40

30

20

10

0

LST\_DMin

LST\_Mean

LST\_sSD

ALB\_DMax

ALB\_DMin

ALB\_Max

ALB\_Min

EVI\_DMax

EVI\_DMin

EVI\_Min

EVI\_sSD

LST\_DMax

algorithm



variable

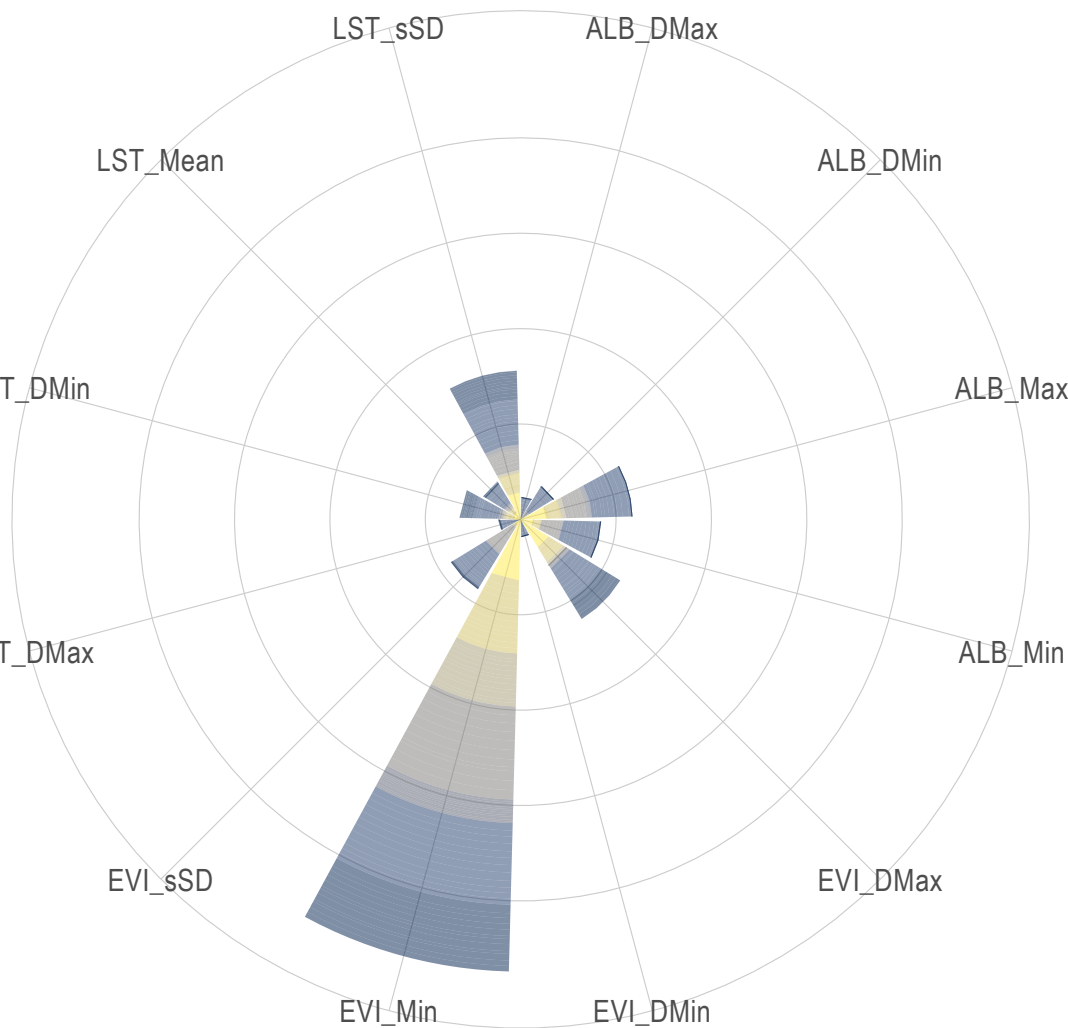

# Seuop

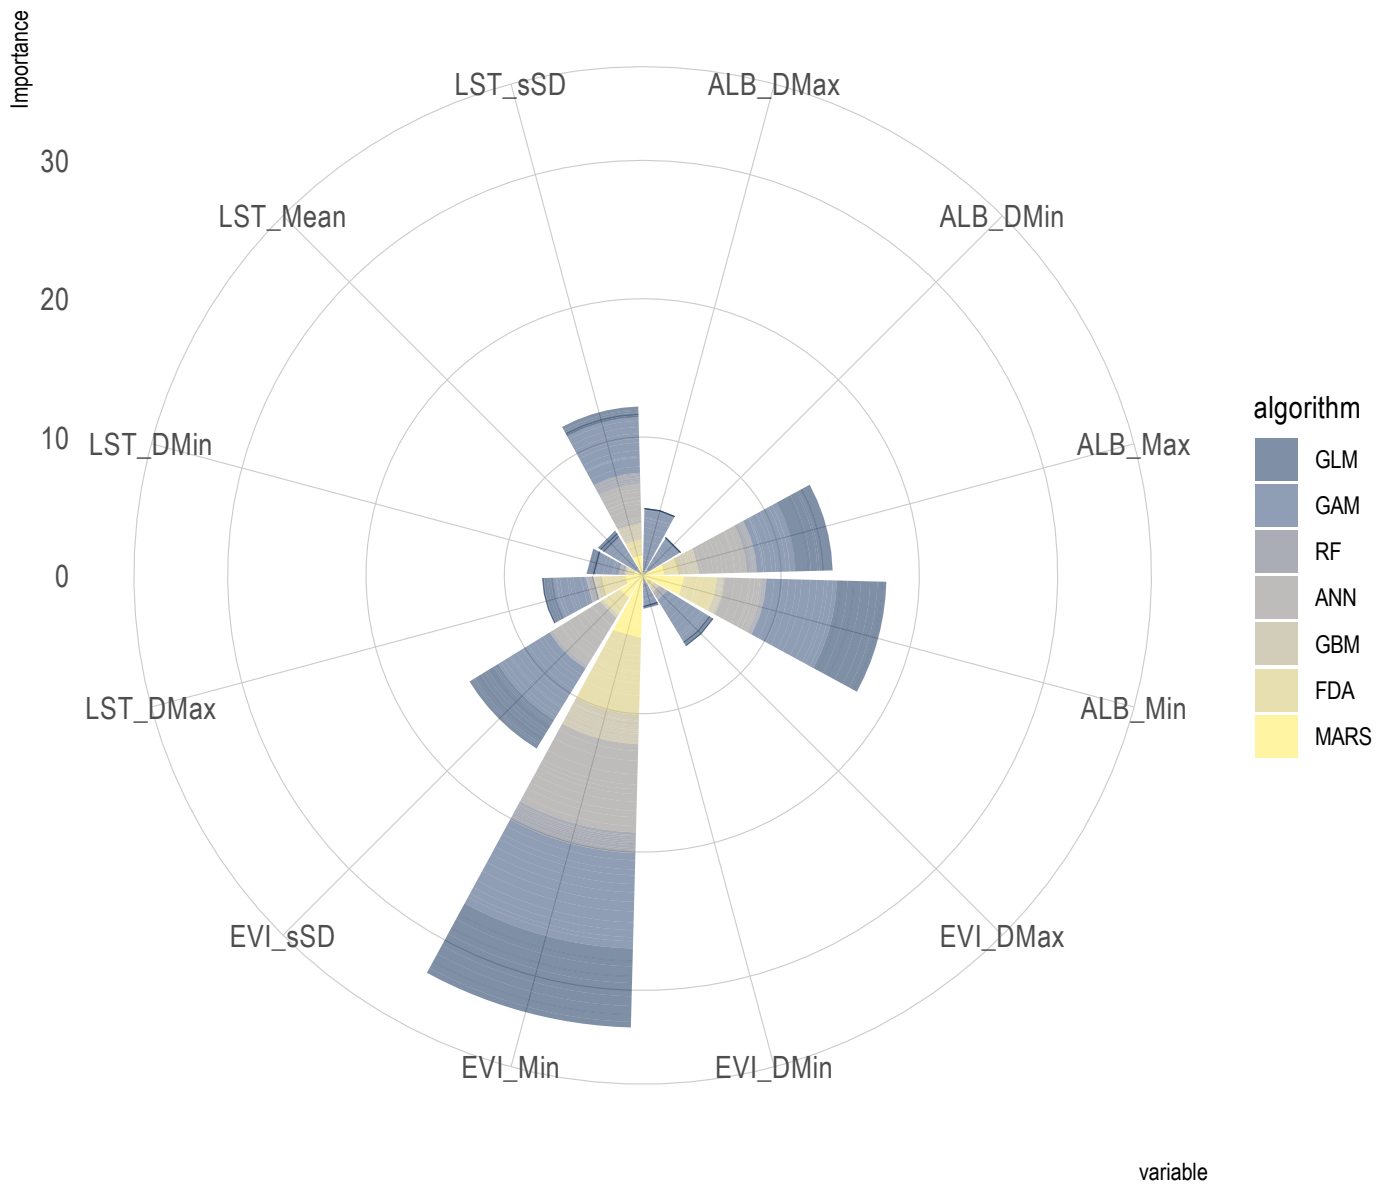

Sser

Importance

40

30

20

10

0

LST\_sSD

ALB\_DMax

ALB\_DMin

ALB\_Max

ALB\_Min

EVI\_DMax

EVI\_DMin

EVI\_Min

EVI\_sSD

LST\_DMax

LST\_DMin

LST\_Mean

algorithm



variable

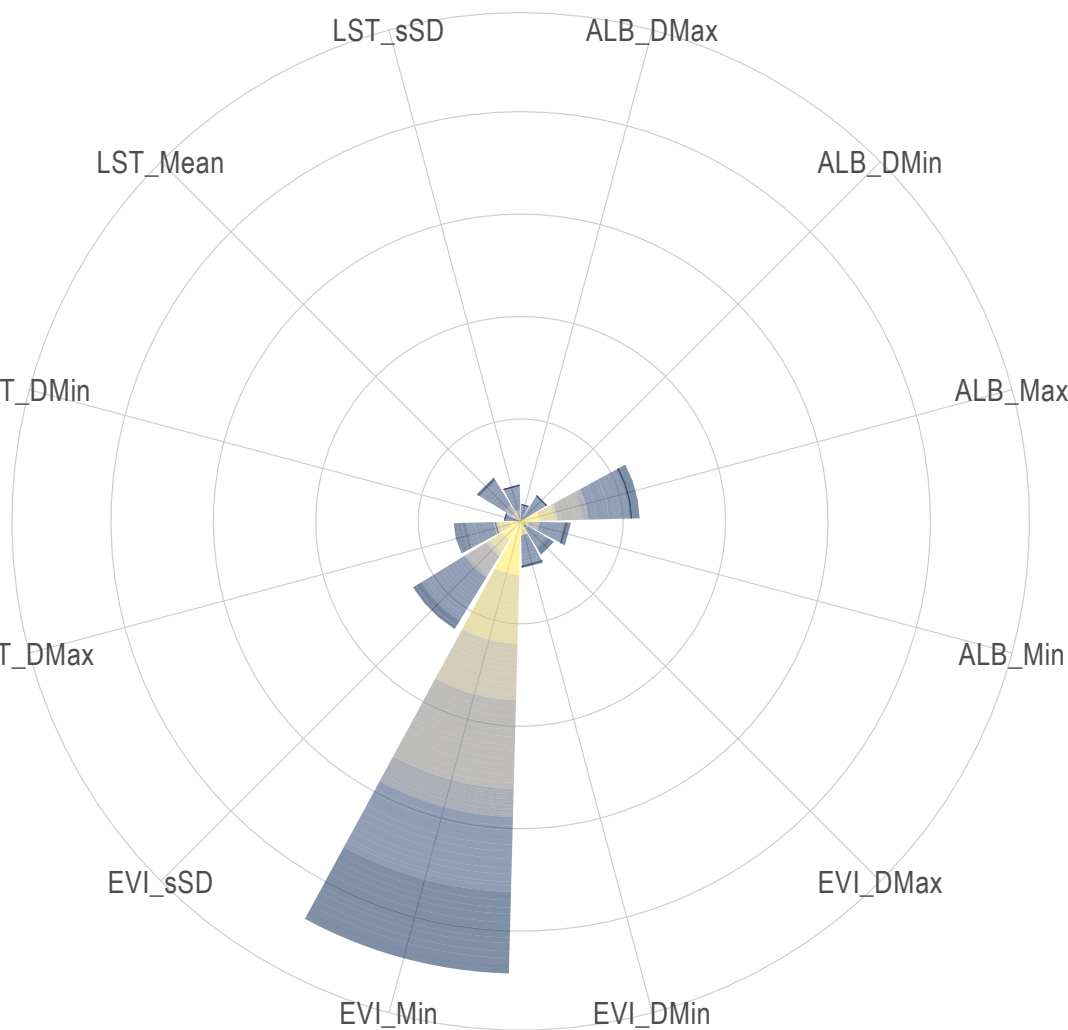

# Storq

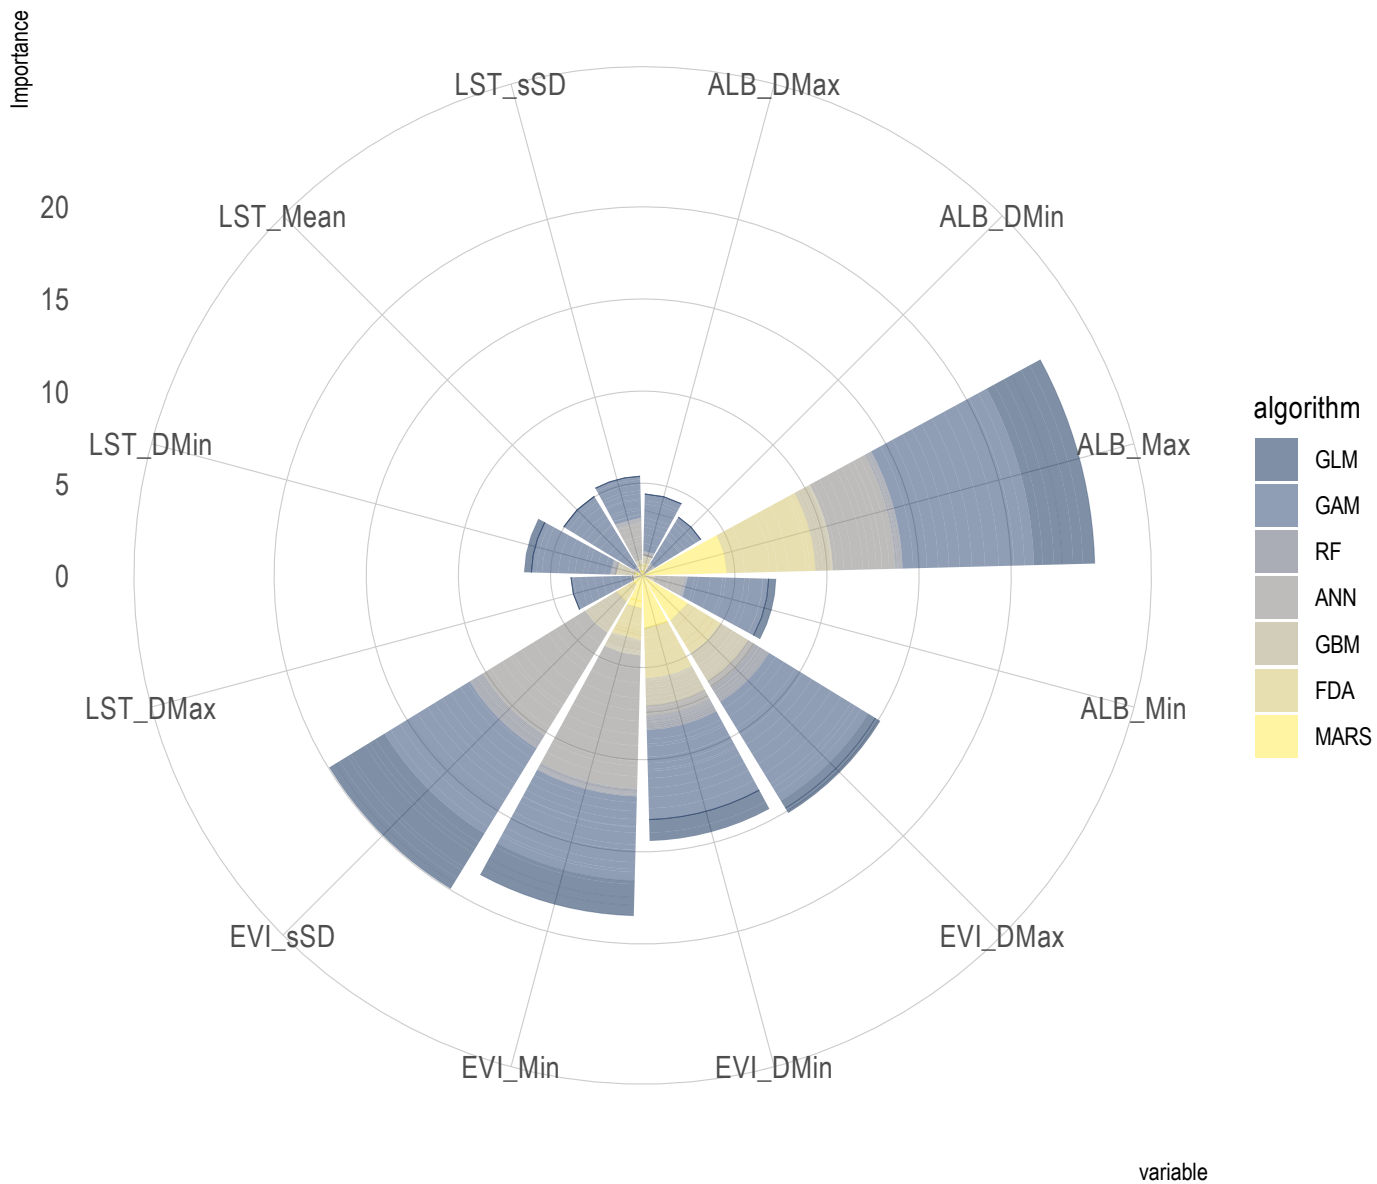

# Sturtur

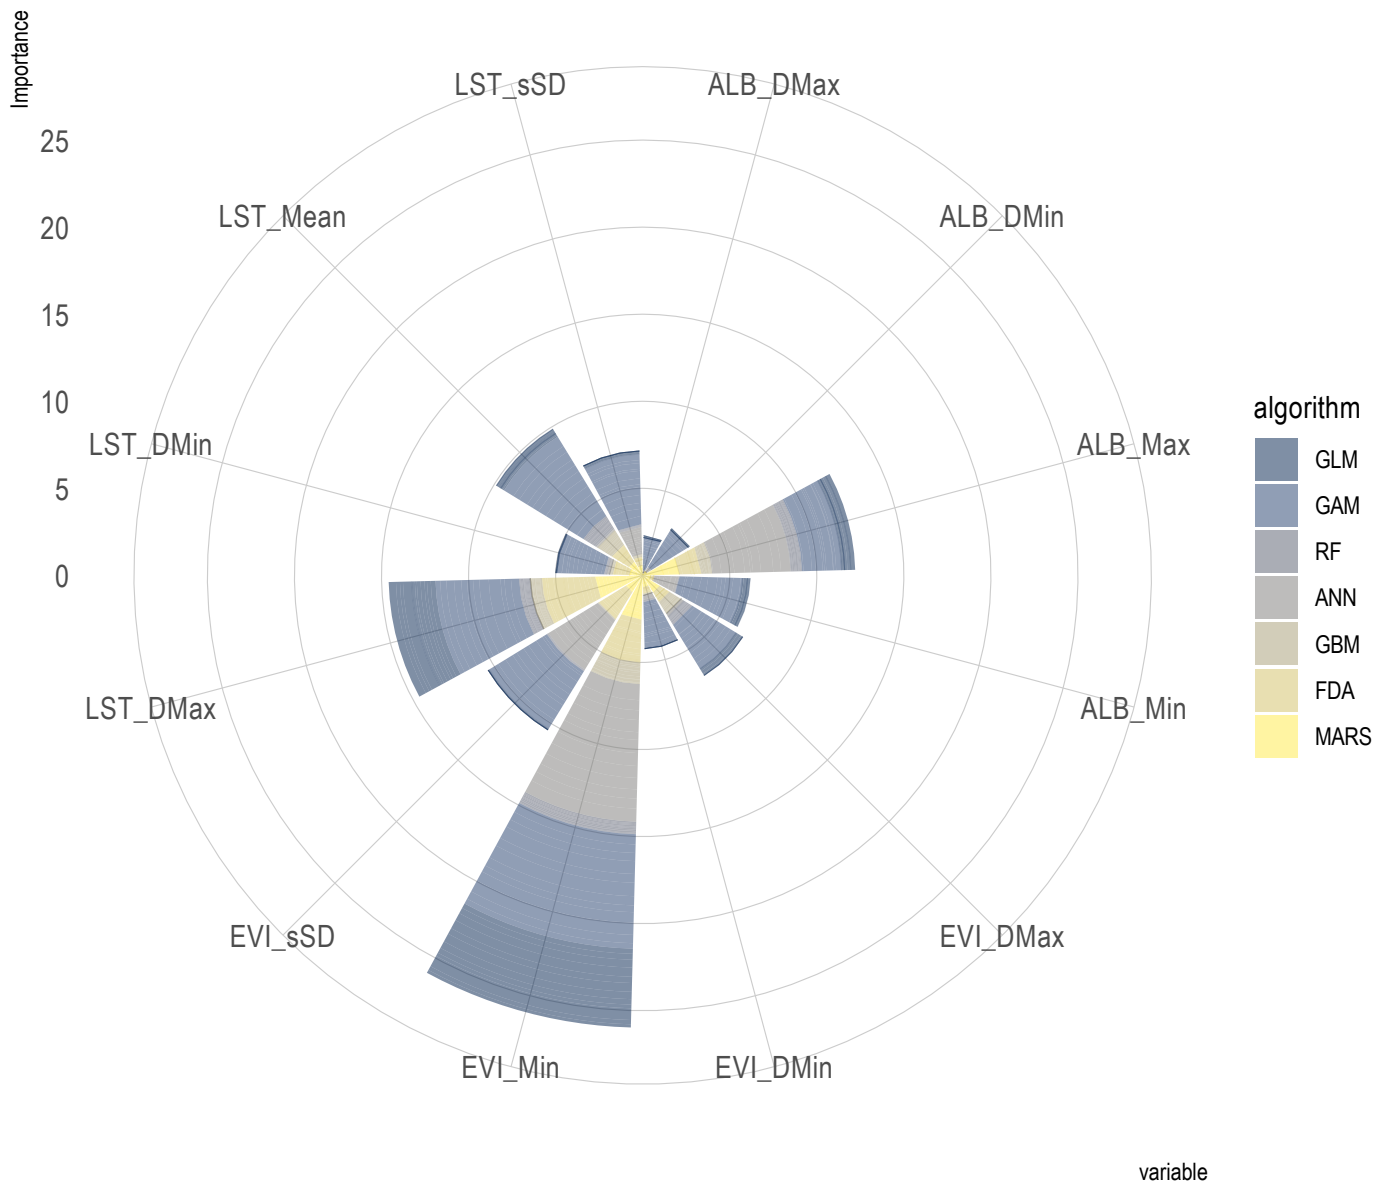

# Sundata

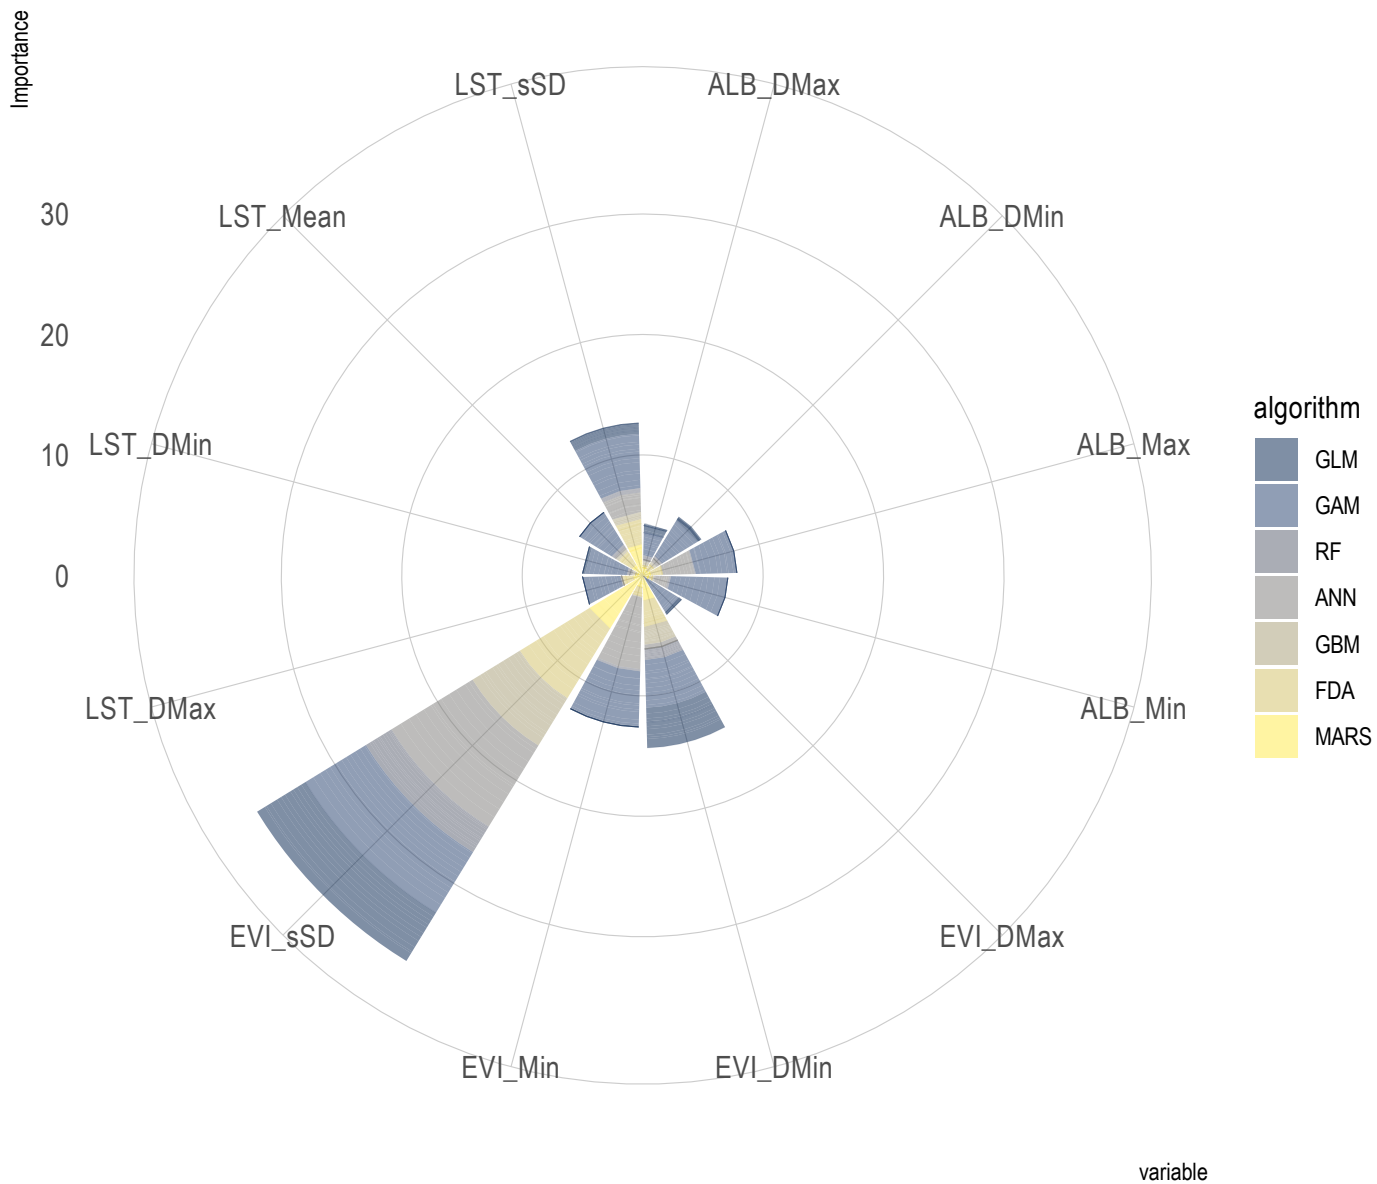

# Sunic

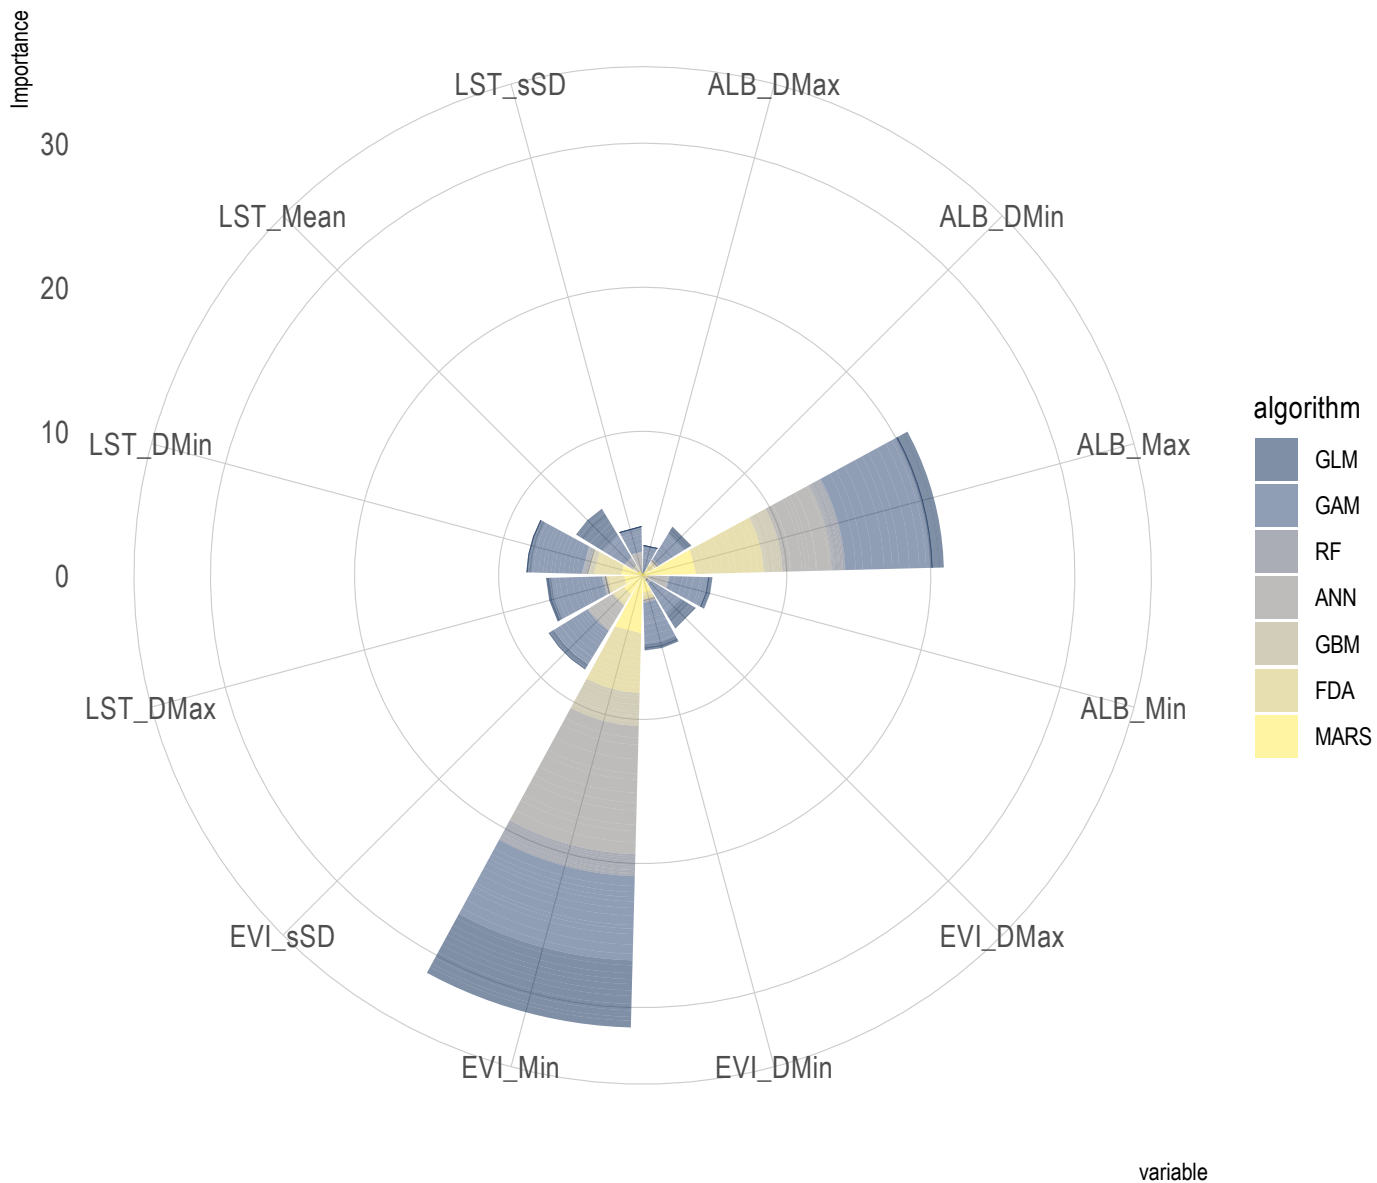

Tmer

Importance

20

15

10

5

0

LST\_sSD

ALB\_DMax

ALB\_DMin

LST\_Mean

LST\_DMin

ALB\_Max

LST\_DMax

ALB\_Min

EVI\_sSD

EVI\_DMax

EVI\_Min

EVI\_DMin

variable

algorithm

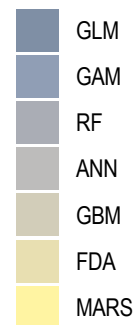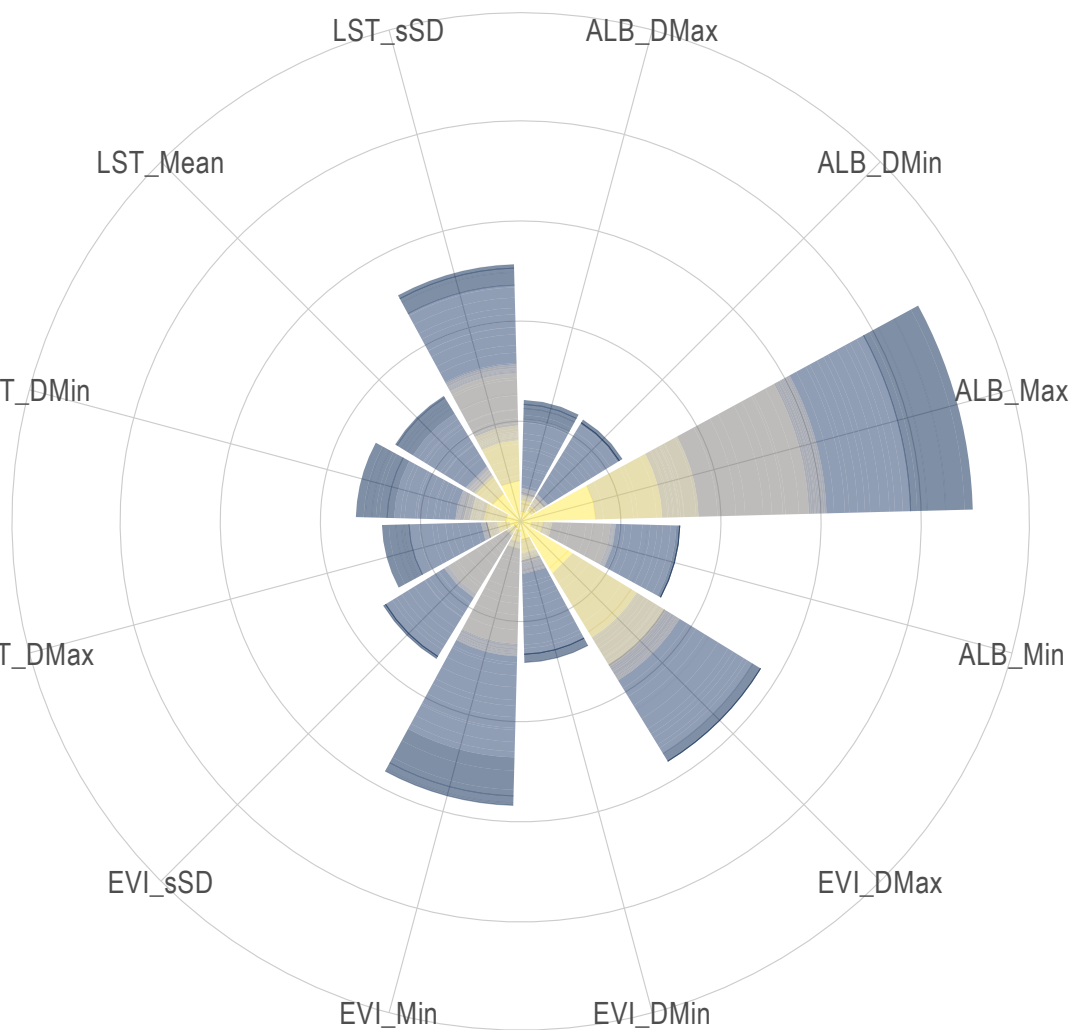

# Tphilo

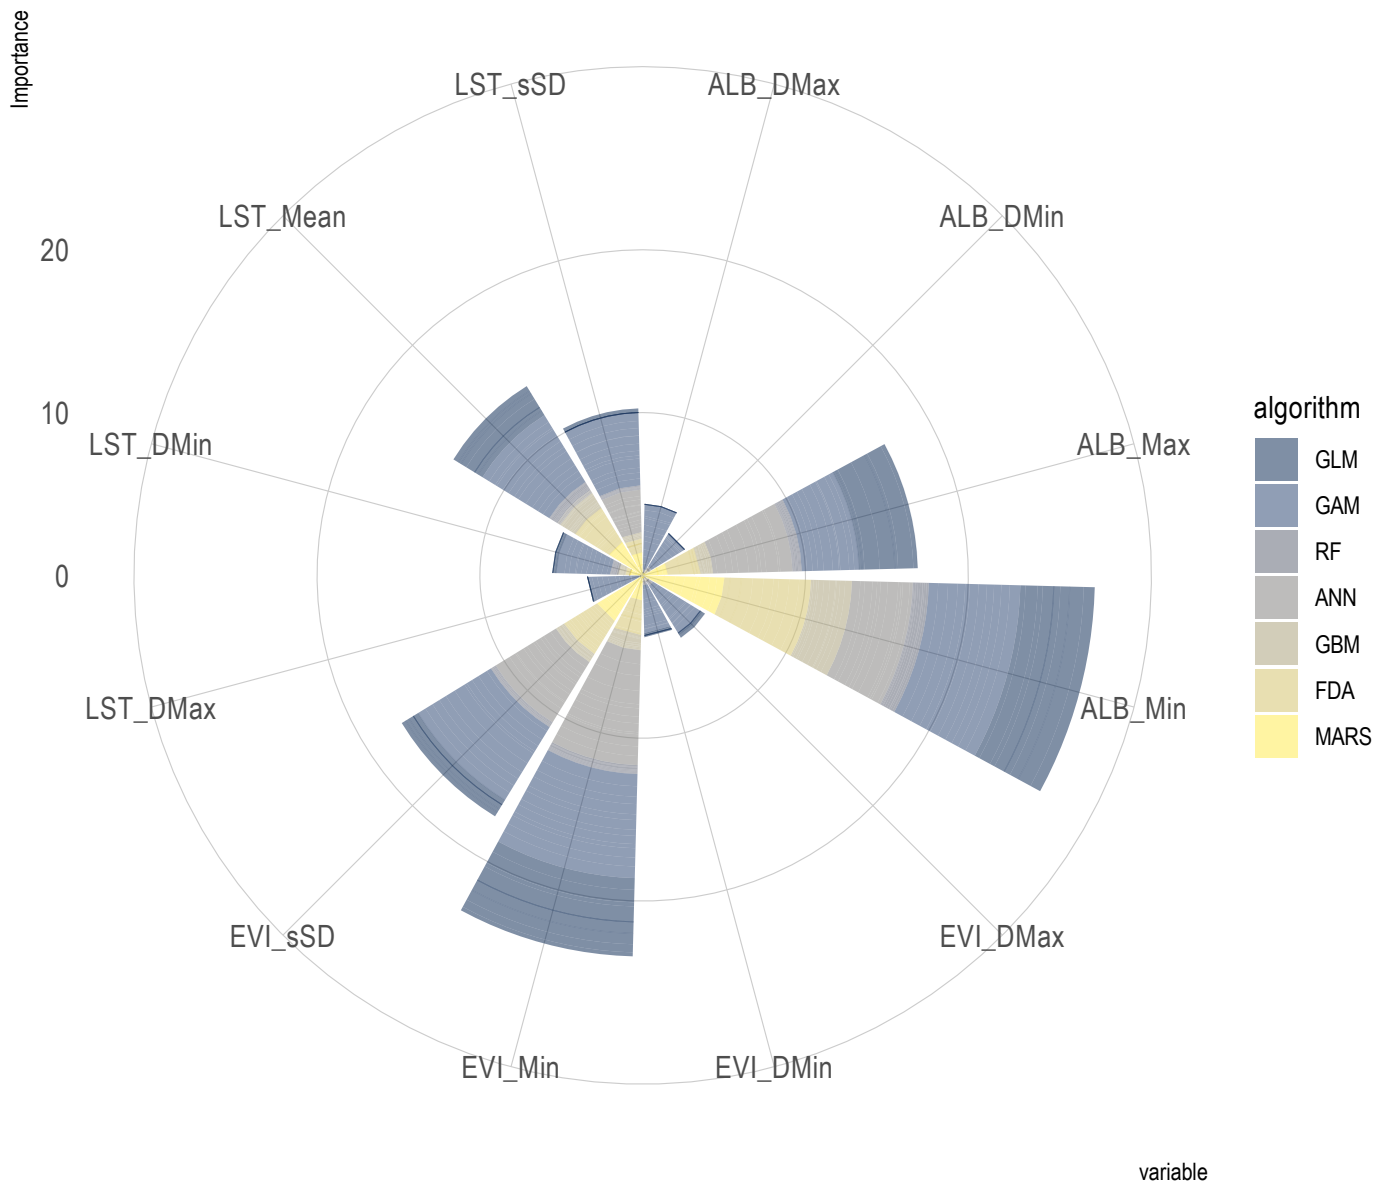

# Ttrog

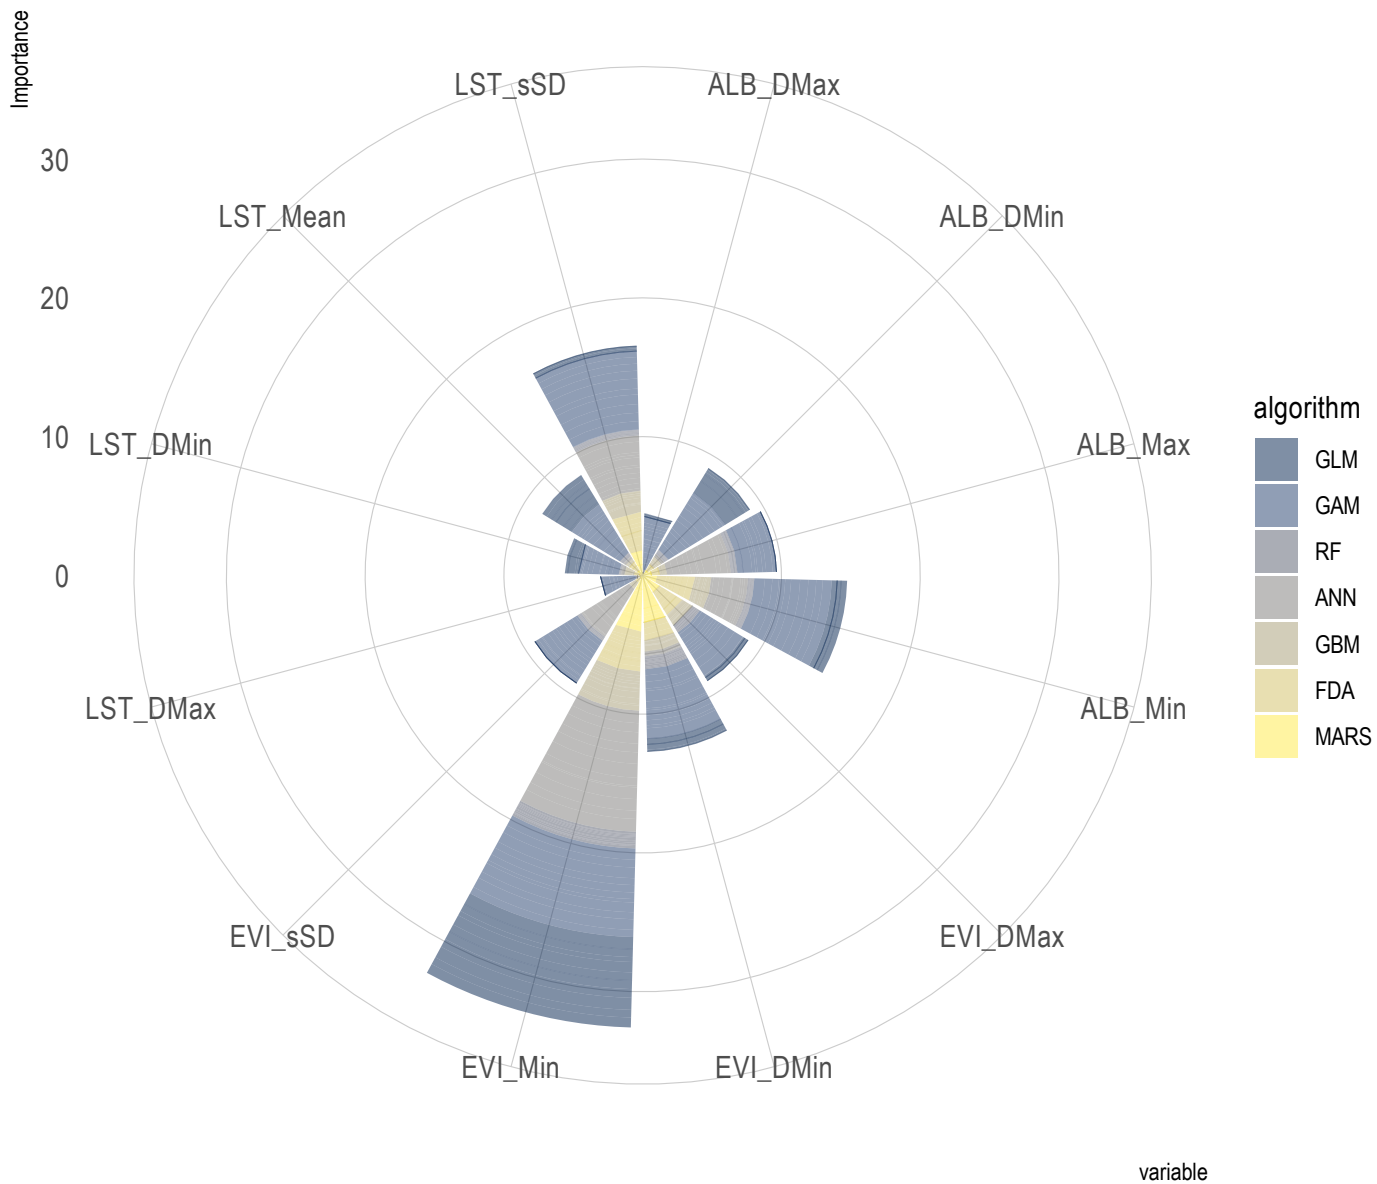

# Tvisciv

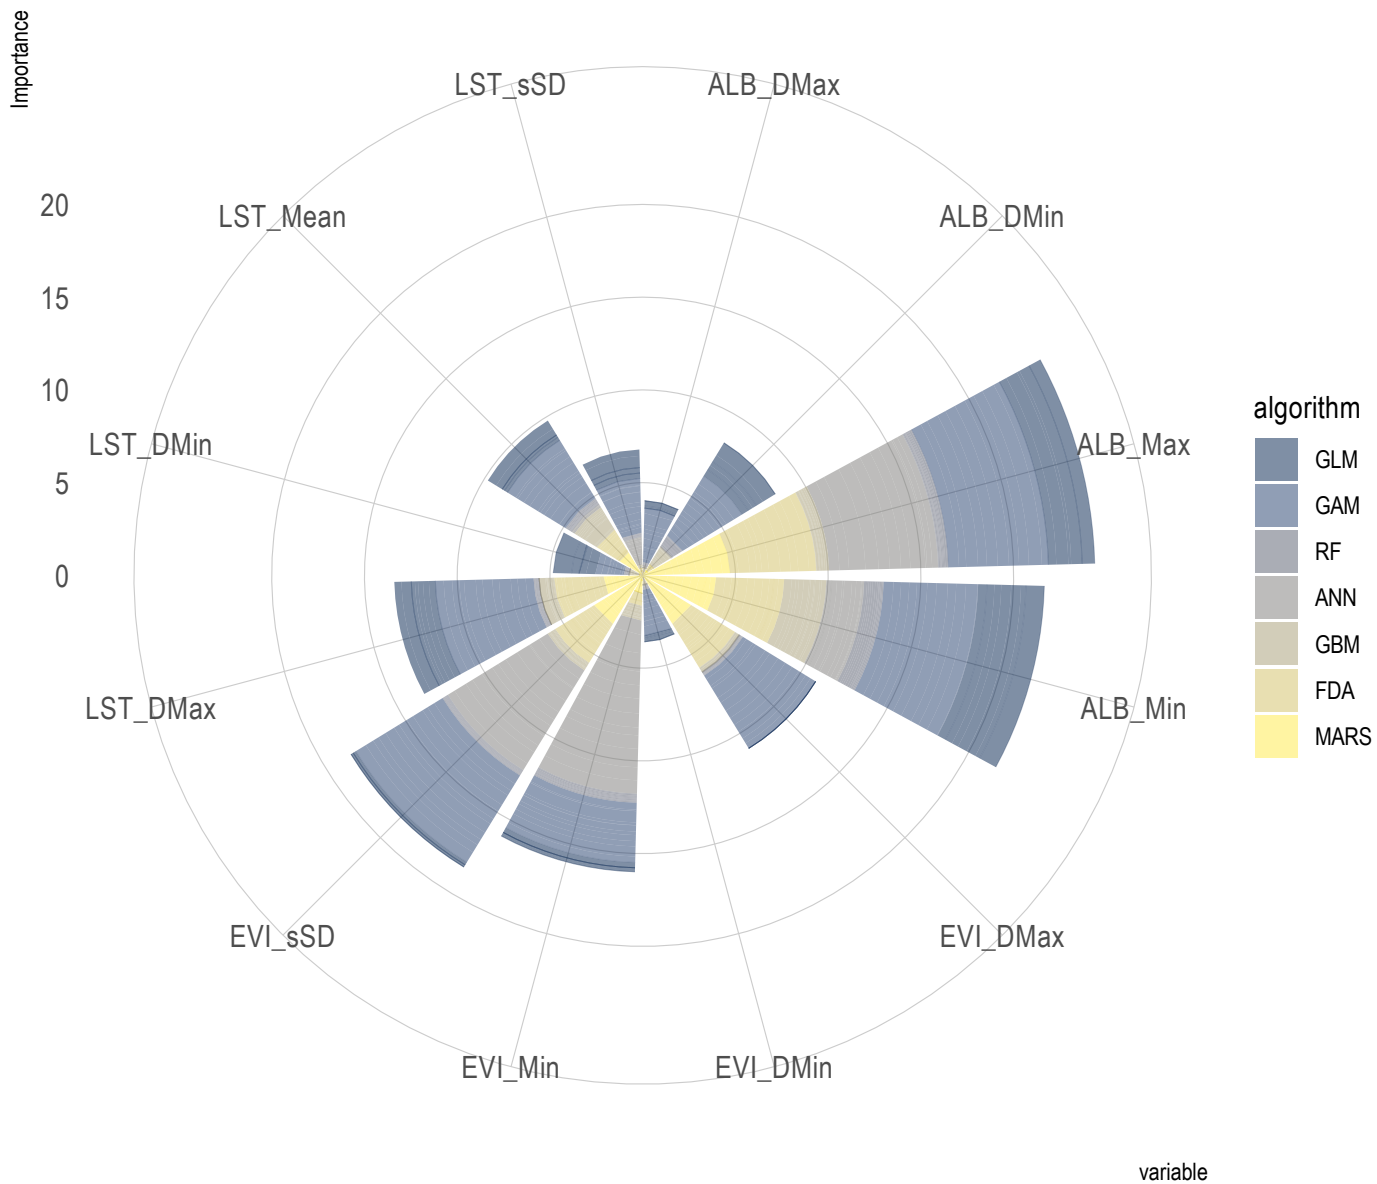

# Uepops

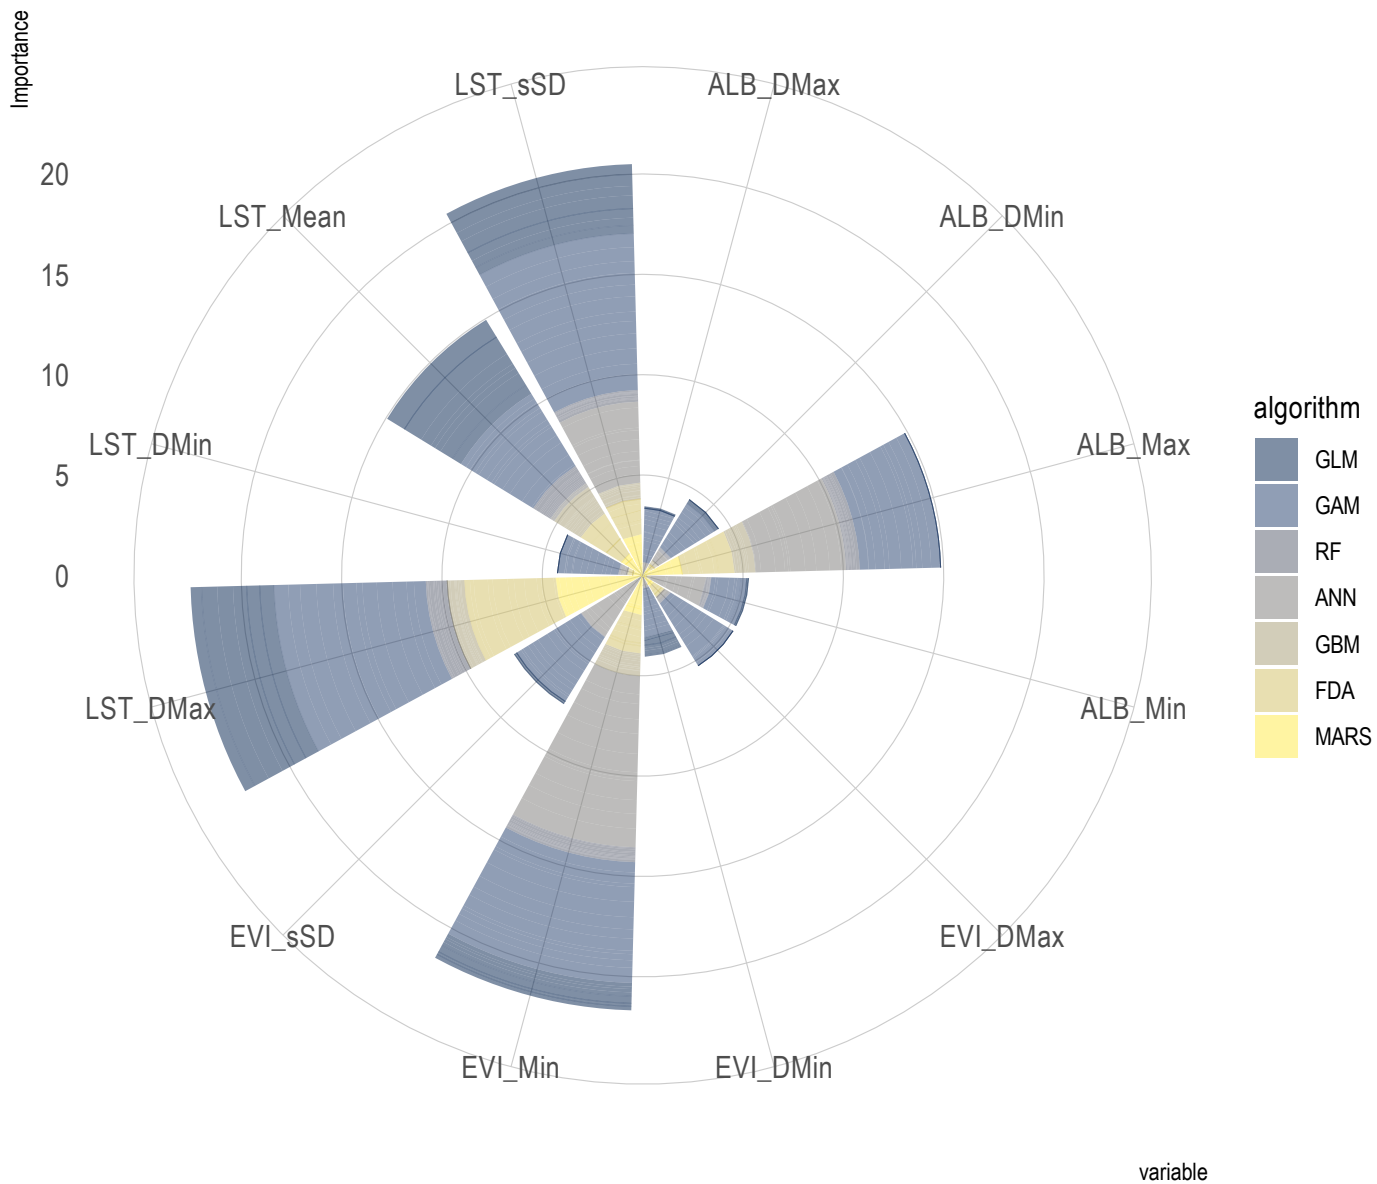

Supplement: s1 [file s1]
