# Supplementary material
Source: MDPI journal article supplement (https://www.mdpi.com/2072-4292/12/16/2549)
Supplement: s1 [file s1]

Archive with 18 entries (18 files):
- Appendix_A.docx
- __MACOSX/._Appendix_A.docx
- Appendix_D.docx
- __MACOSX/._Appendix_D.docx
- Tabla_B1_revised.csv
- __MACOSX/._Tabla_B1_revised.csv
- Figure_B1.pdf
- __MACOSX/._Figure_B1.pdf
- Figure_B2.pdf
- __MACOSX/._Figure_B2.pdf
- Figure_B3.pdf
- __MACOSX/._Figure_B3.pdf
- Figure_B4.pdf
- __MACOSX/._Figure_B4.pdf
- Figure_C1.pdf
- __MACOSX/._Figure_C1.pdf
- Figure_C2.pdf
- __MACOSX/._Figure_C2.pdf
