# Supplementary material
Source: MDPI journal article supplement (https://www.mdpi.com/2072-4292/12/16/2549)
Supplement: s1 [file s1 › Appendix_A.docx]

**Figure A1**: Percentage of area burnt between 2001 and 2017 in the study area calculated from the Collection 6 MODIS Burned Area product.


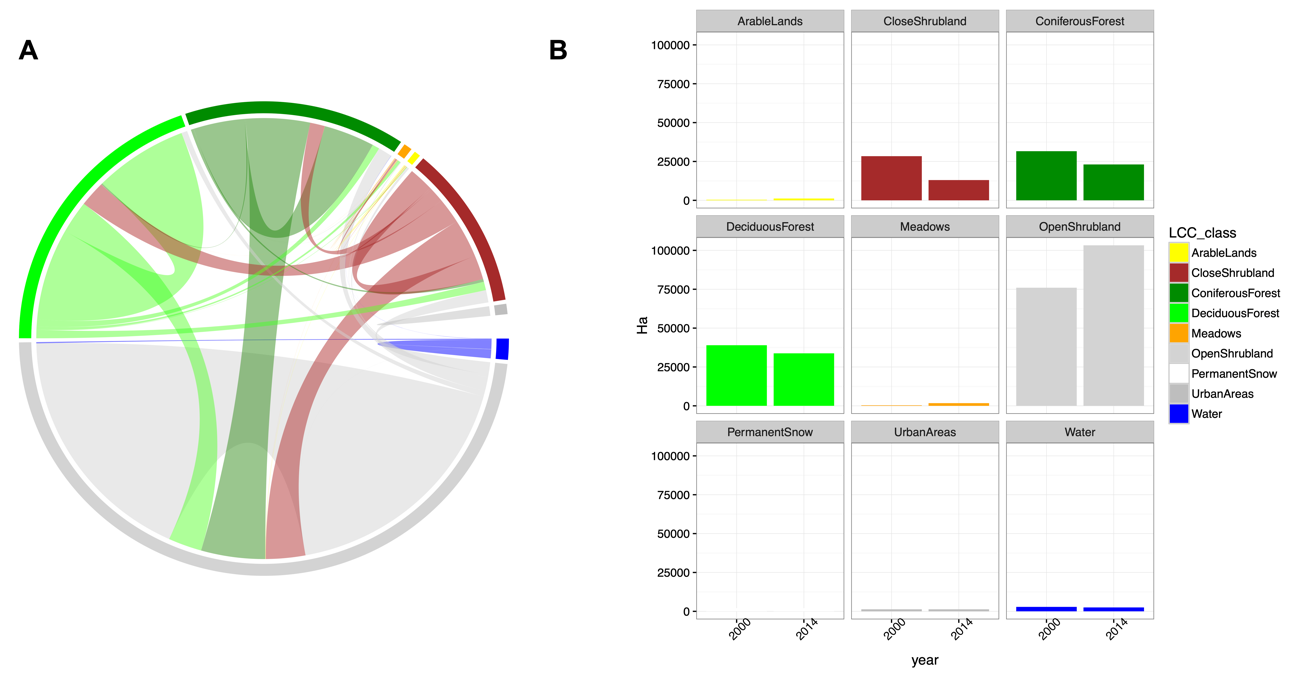


**Figure A2**: ﻿Land-use/cover changes between 2000 and 2014 estimated from Landsat-derived maps: (A) circular plot illustrating the land-cover type transitions, in million hectares (Mha), (B) area covered by each land-cover type per year (in hectares). The size of the lines is proportional in width to the contribution of each land-cover type to the change. The colors refer to the land-cover types.
