# Supplementary material
Source: MDPI journal article supplement (https://www.mdpi.com/2072-4292/12/16/2549)
Supplement: s1 [file s1 › Appendix_D.docx]

**GEE Code snippet to calculate remotely sensed ecosystem functioning attributes, based on time-series of MODIS-EVI index available on GEE platform.**

*# Get the study area*

// In this case, we selected the study area (SA) as region of interest by loading the grid shapefile (2.km square) as a *ee.Geometry.Polygon* polygon. There are several *ee.Geometry* types available at GEE (e.g., shp, csv, etc.)

*var SA = ee.Geometry.Polygon(*

*[[[-7.527008056640625, 42.36487903926742],*

*[-7.527008056640625, 42.07401009292223],*

*[-7.03399658203125, 42.07401009292223],*

*[-7.03399658203125, 42.36487903926742]]]);*

*# Add the study area to the map*

*Map.addLayer(SA);*

*# Get the image collection from GEE for target product, band, and area*

// Add and select the target product from the image collection. This step is performed by the *ImageCollection* function. Filter the collection by product and band (e.g., satellite time series MODIS EVI 250m 16 day; 006/MOD13Q1), and region of interest (SA) by the *filterBounds* function

*var icolMODEVI = ee.ImageCollection('MODIS/MOD13Q1').*

*select("EVI").*

*filterBounds(SA); // ImageCollection filtered by band and study area*

*# Calculate the selected metric by year iteratively*

// After selecting the *ImageCollection*, we compute annual metrics (in this example *mean*) for the time series (2001-2017), through the use of the *mean()* function (also through *ee.Reducer* function). In addition, we set the *start* and *end dates* in years.

// Loop to calculate the metric (*mean*) by year

*for(var yr = 2001; yr < 2018; yr++) {*

*print(ee.Number(yr));* // *ee.Number* around the variable *yr* guarantees that it is passed correctly to GEE servers

*var startYear = ee.Date.fromYMD(ee.Number(yr),1,1);* // First year of the time series

*var endYear = ee.Date.fromYMD(ee.Number(yr),12,31);* // Last year of the time series

*var EVImbyYear = icolMODEVI.*

*filterDate(startYear, endYear).*

*mean().*

*multiply(0.0001);* // Scale factor

*# Exporting Data*

// Export and storage the image by year for the period, specifying type of storage (in this case Drive, but there are other options), name, target folder, scale, region, output file format (in this case GeoTIFF, but there are other options) and coordinate reference system.

*Export.image.toDrive({*

*image: EVImbyYear,*

*description: "EVI" + "mean_" + yr.toString(),*

*folder: 'GEE',*

*scale: 2000,*

*region: SA,*

*fileFormat: 'GeoTIFF',*

*crs: 'EPSG:4326'*

*});*

*}*
