# Supplementary material
Source: MDPI journal article supplement (https://www.mdpi.com/2072-4292/12/16/2549)
Supplement: s1 [file s1 › Tabla_B1_revised.csv]

	Species_acronyms	Scientific_name	habitat_preference	biogeographic_origin	migratory_status	feeding_str	nest_str	cons_status	N_occ	AUC_mean	TSS_mean	HS_ch_mean	Distr_ch_mean	HS_ch_sd	Distr_ch_sd
1	Aapus	Apus apus	urban	mediterranean	migratory	insectivora	infrastructure	LC	49	0,95	0,8	-11,57	-20,25	14,79	23,42
2	Aarven	Alauda arvensis	shrubland	eurosiberian	sedentary	granivora	ground	LC	89	0,99	0,89	2,13	2,82	9,36	29,53
3	Acaud	Aegithalos caudatus	forest	eurosiberian	sedentary	insectivora	trees	LC	57	0,92	0,7	17,11	57,03	39,8	109,72
4	Accipgen	Accipiter gentilis	forest	eurosiberian	sedentary	carnivora	trees	LC	32	0,97	0,88	-15,73	-8,77	20,19	17,79
5	Accipnis	Accipiter nisus	forest	eurosiberian	sedentary	carnivora	trees	LC	25	0,98	0,87	-15,39	-8,9	20,02	19,86
6	Antcamp	Anthus campestris	shrubland	mediterranean	migratory	insectivora	ground	LC	55	0,97	0,83	12,06	22,74	10,93	18,82
7	Antspino	Anthus spinoletta	mountain	eurosiberian	migratory	insectivora	ground	LC	43	0,98	0,9	-3,83	-11,6	19,72	15,52
8	Anttriv	Anthus trivialis	forest	eurosiberian	migratory	insectivora	ground	LC	52	0,96	0,85	-1,7	-2,1	11,43	28,73
9	Arufa	Alectoris rufa	farmland	mediterranean	sedentary	granivora	ground	DD	54	0,94	0,75	-8,11	-13,28	14,33	17,66
10	Bbuteo	Buteo buteo	NA	NA	NA	NA	NA	NA	95	< 0,7	NA	NA	NA	NA	NA
11	Cbrach	Certhia brachydactyla	forest	eurosiberian	sedentary	insectivora	trees	LC	78	1,00	0,95	-0,62	-4,97	10,95	30,25
12	Ccann	Carduelis cannabina	farmland	eurosiberian	migratory	granivora	ground	LC	96	0,78	0,49	8,73	13,11	14,87	22,33
13	Ccanor	Cuculus canorus	farmland	eurosiberian	migratory	insectivora	trees	LC	89	0,89	0,64	5,03	26,11	11,64	66,13
14	Ccard	Carduelis carduelis	farmland	eurosiberian	migratory	granivora	ground	LC	42	0,98	0,87	-6,82	-11,58	19,67	31,84
15	Cchlor	Carduelis chlorolis	forest	eurosiberian	migratory	granivora	trees	LC	43	0,94	0,76	-0,76	-12,87	18,48	22,78
16	Ccorax	Corvus corax	shrubland	eurosiberian	sedentary	omnivora	rocky	LC	34	0,98	0,83	-9,71	4,31	19,12	8,55
17	Ccorone	Corvus corone	farmland	eurosiberian	sedentary	omnivora	trees	LC	88	0,64	0,25	10,04	12,04	12,18	13,17
18	Cgallicus	Circaetus gallicus	forest	mediterranean	migratory	carnivora	trees	LC	50	0,96	0,78	-4,85	-12,04	16,9	17,89
19	Circcyan	Circus cyaneus	shrubland	eurosiberian	sedentary	carnivora	ground	LC	38	0,94	0,77	15,86	2,58	20,5	15,87
20	Circpyg	Circus pygargus	shrubland	eurosiberian	migratory	carnivora	ground	VU	42	0,98	0,88	13,55	-0,98	26,31	22,84
21	Cotcot	Coturnix coturnix	farmland	mediterranean	sedentary	granivora	ground	DD	37	0,99	0,92	10	9,59	16,11	12,64
22	Cpalum	Columba palumbus	forest	mediterranean	sedentary	granivora	trees	LC	86	0,97	0,83	2,26	-6,33	14,1	20,77
23	Dmajor	Dendrocopos major	forest	eurosiberian	sedentary	insectivora	trees	LC	60	0,95	0,76	6,18	7,76	16,91	26,82
24	Durbica	Dolichon urbica	urban	eurosiberian	migratory	insectivora	infrastructure	LC	25	0,98	0,9	33,51	36,81	50,1	60,93
25	Ecia	Emberiza cia	shrubland	eurosiberian	sedentary	granivora	ground	LC	113	0,98	0,89	-4,38	-12,81	7,68	23,43
26	Ecirlus	Emberiza cirlus	farmland	mediterranean	sedentary	granivora	trees	LC	28	0,98	0,87	-3,21	-8,67	22,21	14,82
27	Erube	Erithachus rubecula	farmland	eurosiberian	sedentary	insectivora	ground	LC	112	0,98	0,87	-0,46	41,3	14,86	95,25
28	Fcoel	Fringilla coelebs	forest	eurosiberian	migratory	granivora	trees	LC	109	0,90	0,7	0,1	-3,47	13,19	34,71
29	Ftin	Falco tinnunculus	shrubland	eurosiberian	sedentary	carnivora	trees	LC	41	0,98	0,87	-2,4	2,16	12,05	10,47
30	Ggland	Garrulus glandarius	forest	eurosiberian	sedentary	omnivora	trees	LC	98	0,97	0,84	0,45	8,33	9,33	59,06
31	Hpolyg	Hippolais polyglotta	shrubland	mediterranean	migratory	insectivora	trees	LC	26	0,98	0,83	-10,96	-7,41	26,1	21,39
32	Hrust	Hirundo rustica	urban	eurosiberian	migratory	insectivora	infrastructure	LC	55	0,95	0,77	6,82	3,98	20,13	28,39
33	Lcoll	Lanius collurio	shrubland	eurosiberian	migratory	carnivora	trees	LC	27	0,97	0,87	-0,66	-5,48	23,67	16,09
34	Lmegar	Luscinia megarhynchos	shrubland	mediterranean	migratory	insectivora	ground	LC	32	1,00	0,95	-10,24	-17,26	25,74	22,2
35	Lularb	Lullula arborea	shrubland	mediterranean	sedentary	insectivora	ground	LC	44	0,97	0,85	2,31	-6,52	15,15	13,6
36	Malba	Motacilla alba	farmland	eurosiberian	sedentary	insectivora	infrastructure	LC	54	0,93	0,76	-5,22	-1,79	10,22	3,57
37	Mapiast	Merops apiaster	mountain	mediterranean	migratory	insectivora	rocky	NT	24	1,00	1	-27,93	-41,38	25,52	34,79
38	Mcaland	Miliaria calandra	farmland	eurosiberian	sedentary	granivora	ground	LC	24	0,99	0,94	6,19	-3,54	26,79	25,36
39	Mciner	Motacilla cinerea	forest	eurosiberian	sedentary	insectivora	ground	LC	35	0,93	0,74	0,59	-1,67	17,92	23,32
40	Msaxat	Monticola saxatilis	shrubland	mediterranean	migratory	insectivora	rocky	LC	40	0,95	0,82	-7,92	-15,8	19,2	23,72
41	Ooenan	Oenanthe oenanthe	mountain	eurosiberian	migratory	insectivora	rocky	LC	52	0,98	0,9	1,96	-5,33	12,18	11,39
42	Ooriolus	Oriolus oriolus	forest	eurosiberian	migratory	insectivora	trees	LC	56	0,92	0,7	9,9	5,35	22,19	31,67
43	Papiv	Pernis apivorus	forest	eurosiberian	migratory	omnivora	trees	LC	28	0,98	0,91	6,38	5,23	12,76	8,89
44	Pater	Periparus ater (formerly Parus ater)	forest	eurosiberian	sedentary	insectivora	trees	LC	93	0,92	0,67	-9,62	-17,03	10,14	17,05
45	Pbonelli	Phylloscopus bonelli	forest	mediterranean	migratory	insectivora	ground	LC	51	0,96	0,8	3,14	15,87	22,43	47,35
46	Pcaer	Cyanistes caeruleus (formerly Parus caeruleus)	forest	eurosiberian	sedentary	insectivora	trees	LC	79	0,94	0,72	7,88	26,94	18,08	46,56
47	Pcollyb	Phylloscopus collybita	forest	eurosiberian	sedentary	insectivora	ground	LC	22	0,98	0,89	-16,39	-16,65	21,29	19,09
48	Pcrist	Lophophanes cristatus (formerly Parus cristatus)	forest	eurosiberian	sedentary	insectivora	trees	LC	53	0,99	0,89	2,07	5,99	12,29	36,41
49	Pdom	Passer domesticus	urban	eurosiberian	sedentary	omnivora	infrastructure	LC	53	0,96	0,77	3,32	-8,37	19,2	21,37
50	Pibericus	Phylloscopus ibericus	forest	eurosiberian	migratory	insectivora	trees	LC	81	0,98	0,88	-10,2	-29,35	12,89	40,54
51	Picapica	Pica pica	farmland	eurosiberian	sedentary	omnivora	trees	LC	32	0,98	0,91	-7,17	-0,65	11,18	1,29
52	Pmajor	Parus major	forest	eurosiberian	sedentary	insectivora	trees	LC	92	0,92	0,71	-2,26	-3,05	18,25	36,34
53	Pmodul	Prunella modularis	shrubland	eurosiberian	sedentary	insectivora	trees	LC	126	0,83	0,55	15,91	22,39	11,07	14,86
54	Pochrur	Phoenicurus ochruros	NA	NA	NA	NA	NA	NA	98	< 0,7	NA	NA	NA	NA	NA
55	Pphoenic	Phoenicurus phoenicurus	forest	eurosiberian	migratory	insectivora	trees	VU	29	1,00	0,95	-10,82	-13,37	21,47	19,21
56	Ppyrr	Pyrrhula pyrrhula	forest	eurosiberian	migratory	granivora	ground	LC	52	0,95	0,75	13,37	8,5	13,63	11,53
57	Prupest	Ptyonoprogne rupestris	mountain	eurosiberian	sedentary	insectivora	rocky	LC	36	0,90	0,67	8,14	-5,83	13,94	17,24
58	Pviridis	Picus viridis	forest	mediterranean	sedentary	insectivora	trees	NT	78	0,93	0,72	-2,81	-11,07	13,08	24,4
59	Rignic	Regulus ignicapilla	forest	eurosiberian	migratory	insectivora	trees	LC	71	0,97	0,85	-5,63	-9,25	7,36	11,75
60	Satric	Sylvia atricapilla	shrubland	eurosiberian	sedentary	insectivora	ground	LC	113	0,96	0,8	-5,92	-18,12	11,12	29,6
61	Scantill	Sylvia inornata (formerly Sylvia cantillans)	shrubland	mediterranean	migratory	insectivora	trees	LC	32	0,99	0,92	-17,14	-20,65	24,67	25,38
62	Scom	Sylvia communis	shrubland	eurosiberian	migratory	insectivora	ground	LC	46	0,97	0,82	14,79	24,52	27,14	41,99
63	Seurop	Sitta europaea	forest	eurosiberian	sedentary	insectivora	trees	LC	43	0,97	0,87	-1,88	-3,58	16,77	23,7
64	Sser	Serinus serinus	farmland	mediterranean	migratory	granivora	trees	LC	68	0,97	0,82	-1,51	-6,97	21,05	32,95
65	Storq	Saxicola rubicola (formerly Saxicola torquata)	shrubland	eurosiberian	sedentary	insectivora	ground	LC	111	0,76	0,44	14,77	30,65	18,23	45,01
66	Sturtur	Streptopelia turtur	forest	mediterranean	migratory	granivora	trees	VU	51	0,96	0,78	-3,29	-9,36	16,49	15,83
67	Sundata	Sylvia undata	shrubland	eurosiberian	sedentary	insectivora	trees	LC	110	0,96	0,8	-0,73	1,27	4,99	23,93
68	Sunic	Sturnus unicolor	urban	mediterranean	sedentary	omnivora	infrastructure	LC	40	0,98	0,88	-0,06	-7,85	18,6	14,05
69	Tmer	Turdus merula	farmland	eurosiberian	sedentary	omnivora	trees	LC	122	0,98	0,88	-4,99	-23,41	8,74	38,38
70	Tphilo	Turdus philomelos	forest	eurosiberian	sedentary	omnivora	trees	LC	61	0,91	0,69	4,53	-5,67	10,04	14,31
71	Ttrog	Troglodytes troglodytes	shrubland	eurosiberian	sedentary	insectivora	trees	NT	128	0,81	0,51	4,83	29,55	12,37	59,45
72	Tvisciv	Turdus viscivorus	forest	eurosiberian	sedentary	omnivora	trees	LC	51	0,96	0,8	-7,93	-8,32	16,43	19,51
73	Uepops	Upupa epops	farmland	mediterranean	migratory	insectivora	trees	LC	22	0,98	0,85	-12,87	-8,36	23,72	13,94
