# Supplementary material
Source: MDPI journal article supplement (https://www.mdpi.com/2072-4292/12/16/2549)

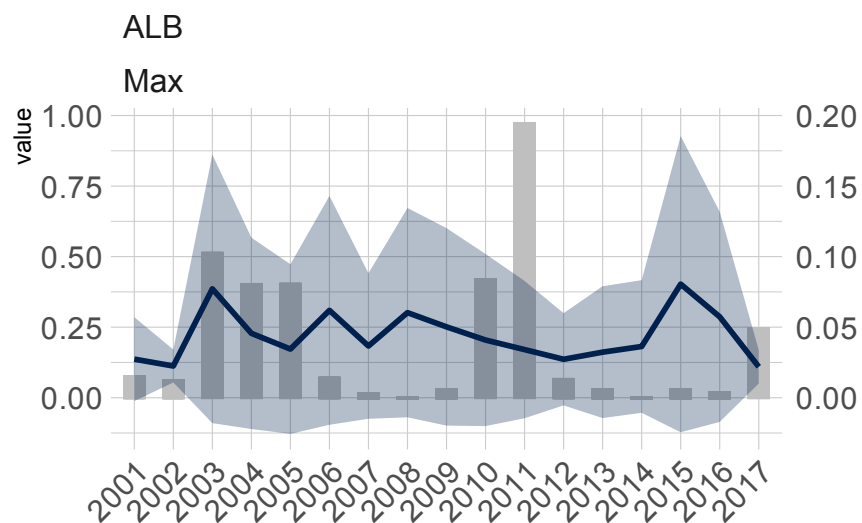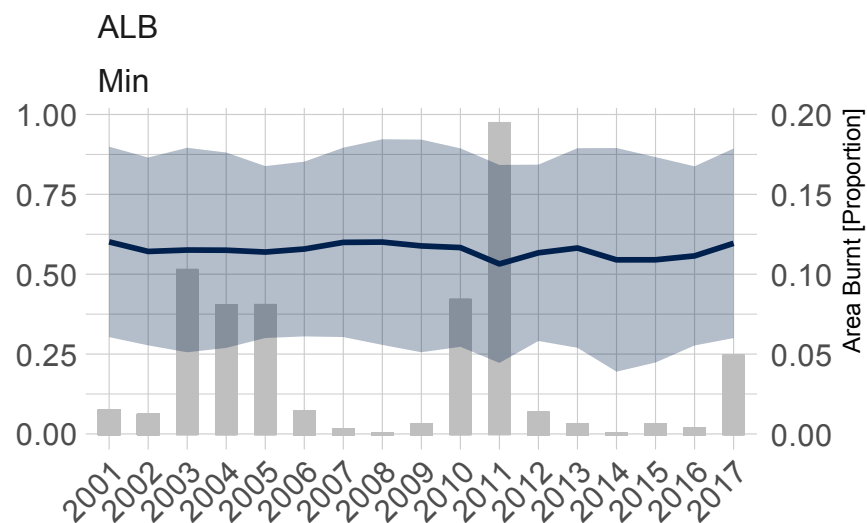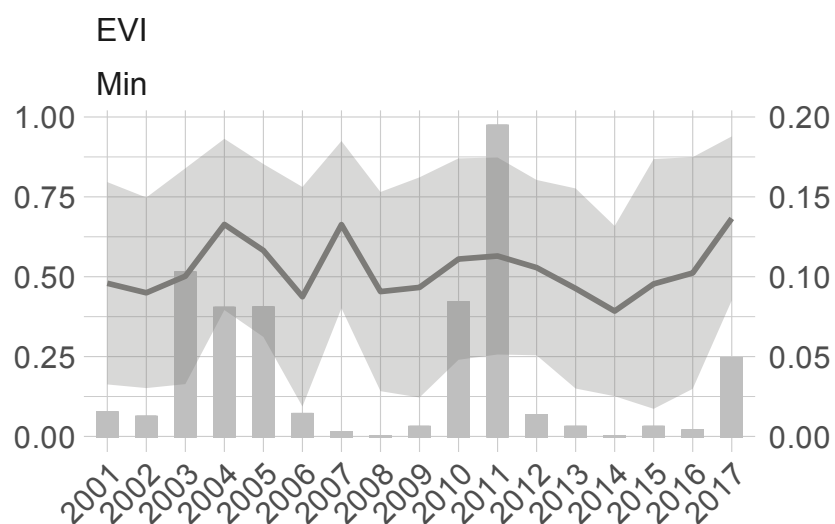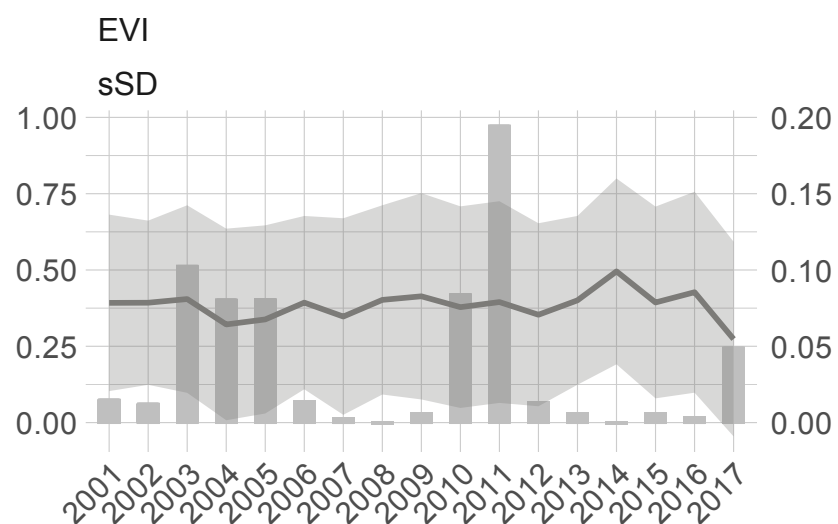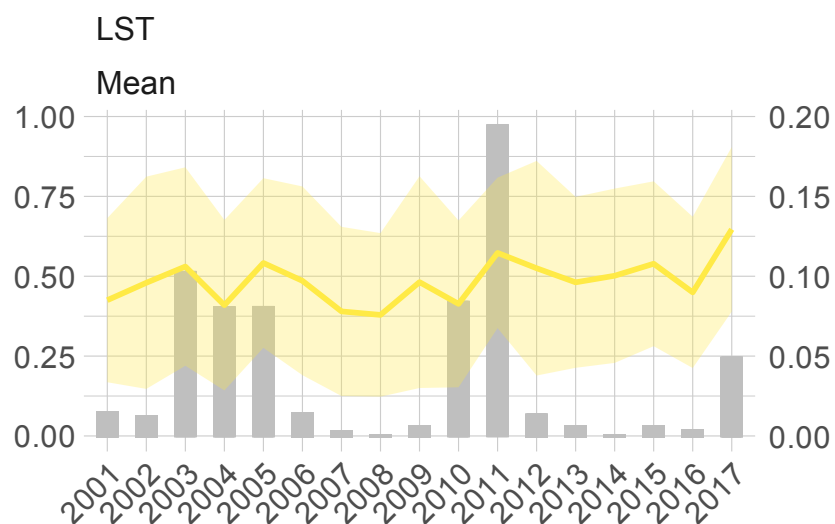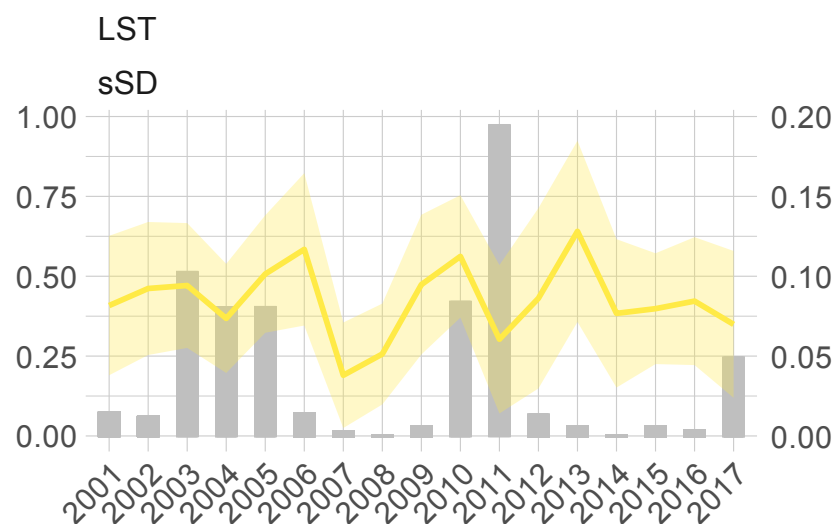

year

Supplement: s1 [file s1]

Matriz de Correlación de los EPA

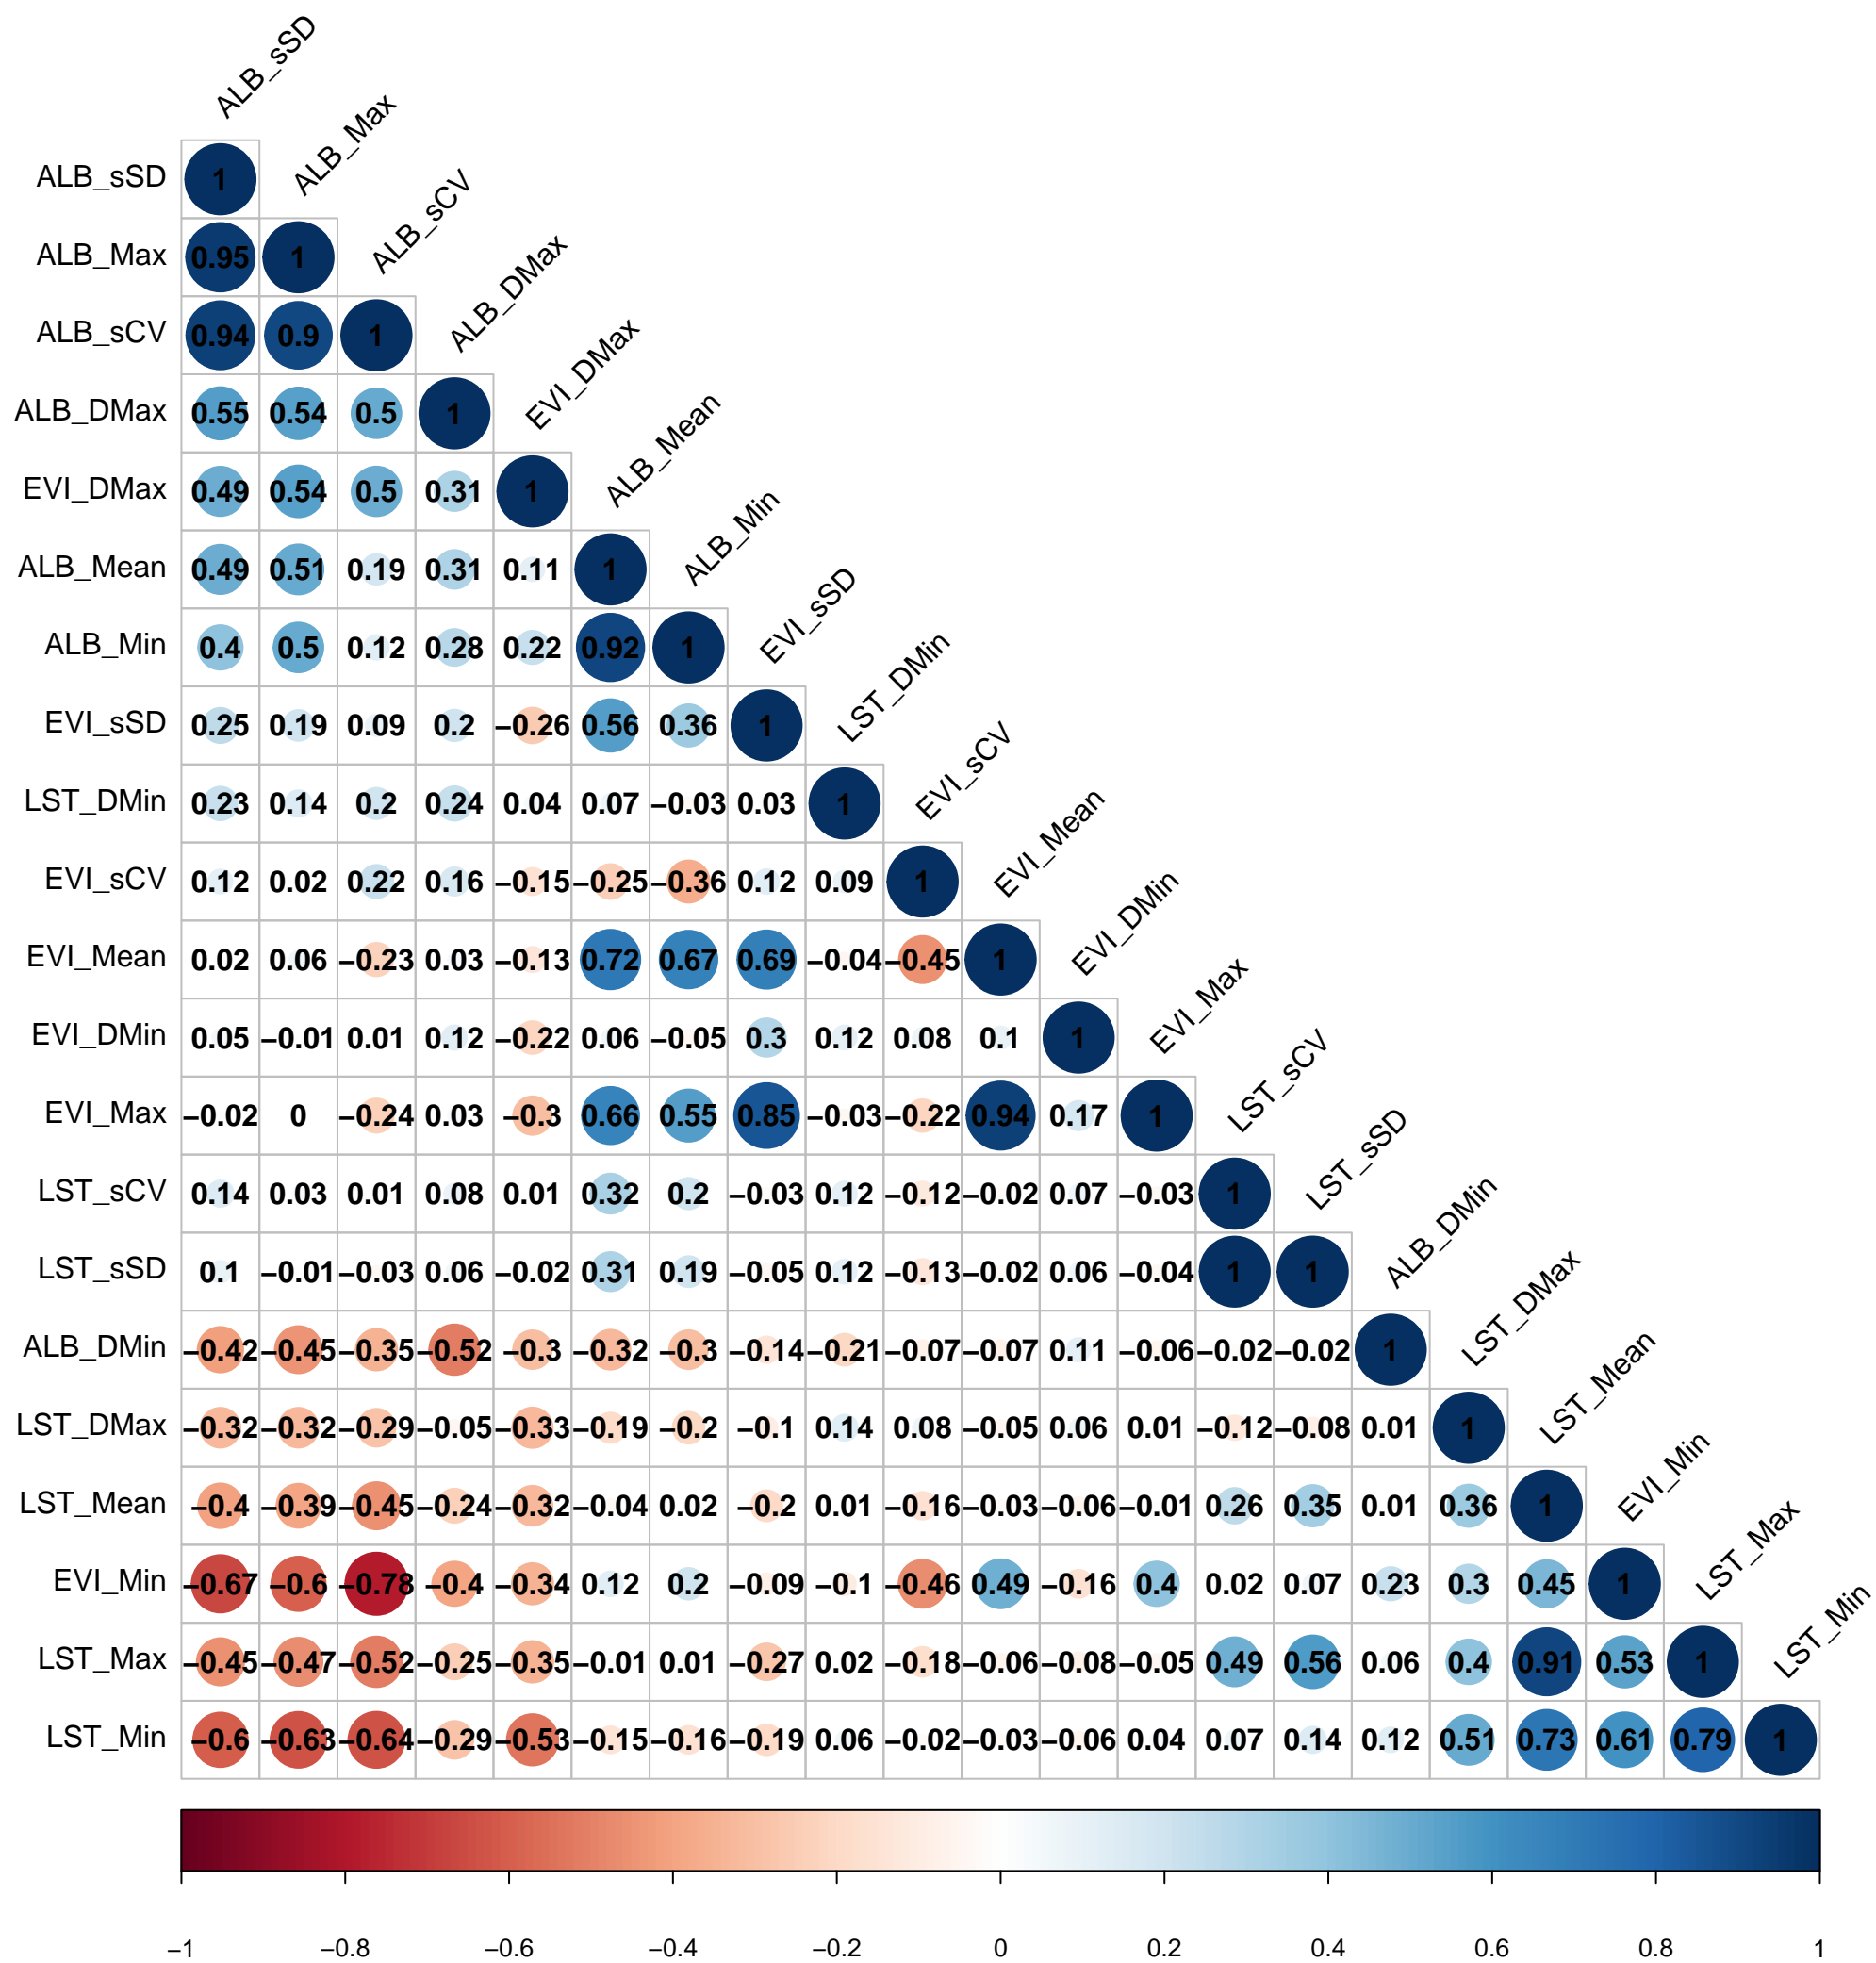

Supplement: s1 [file s1]

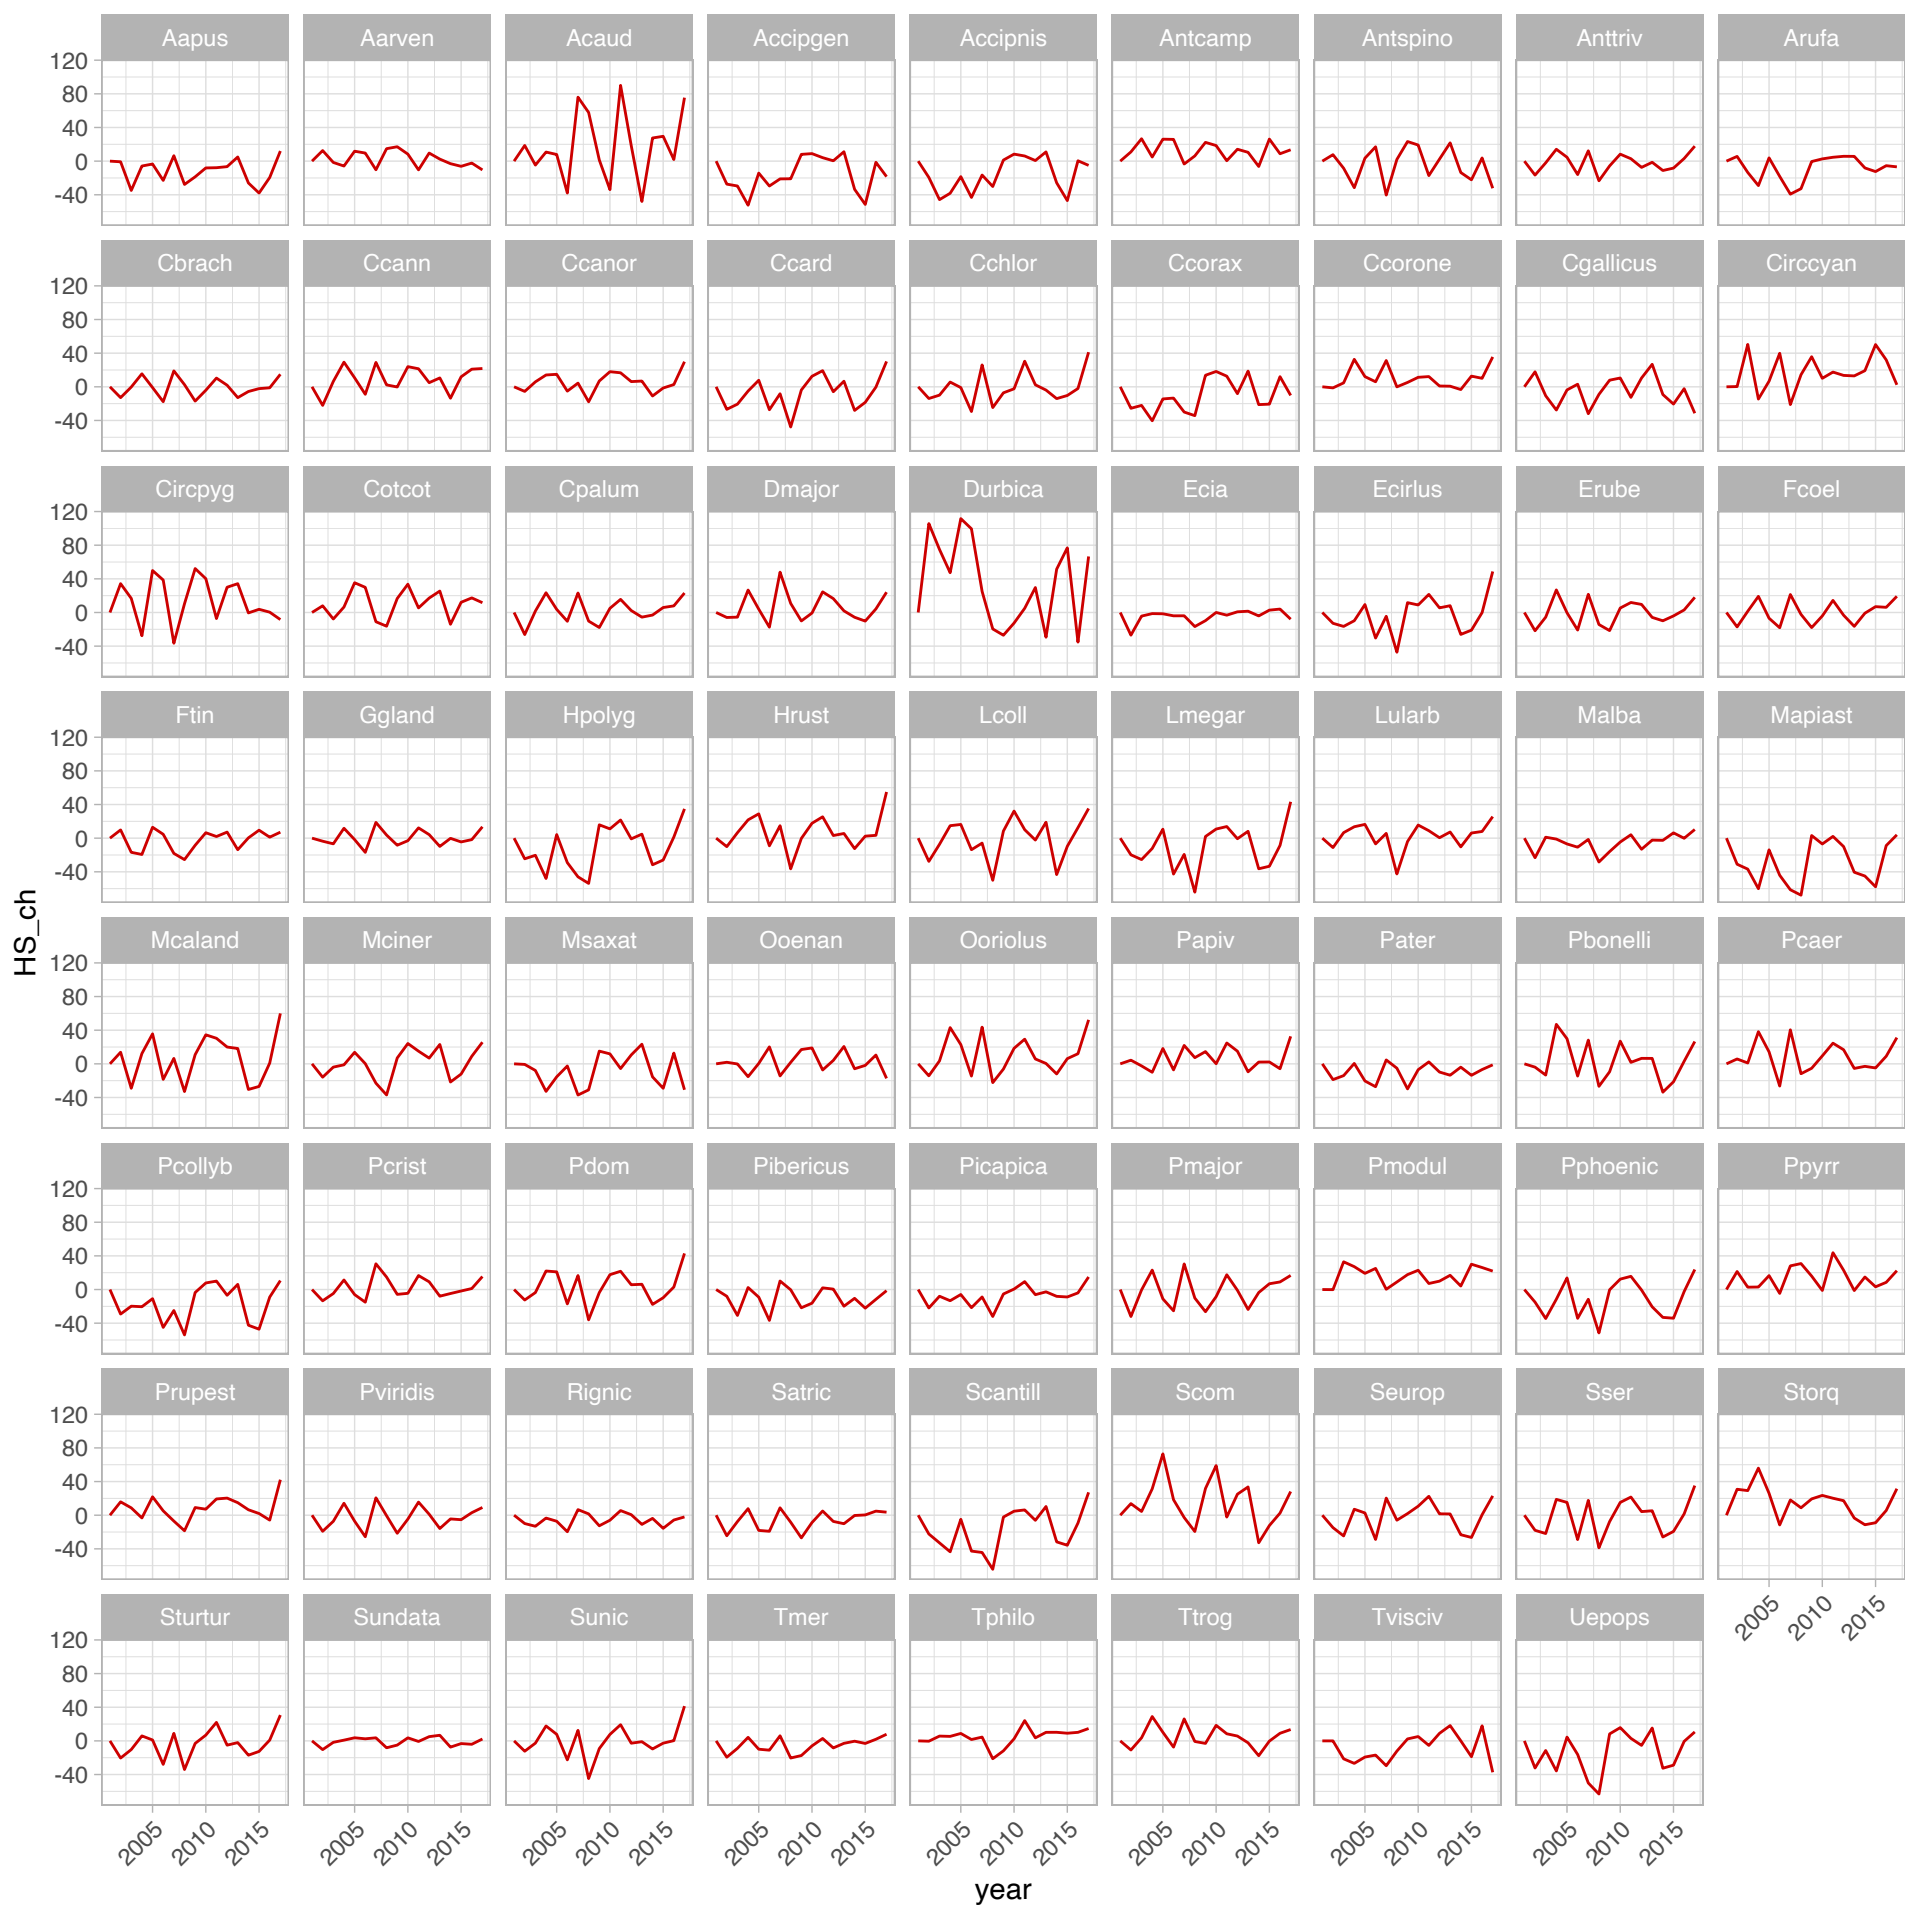

Supplement: s1 [file s1]

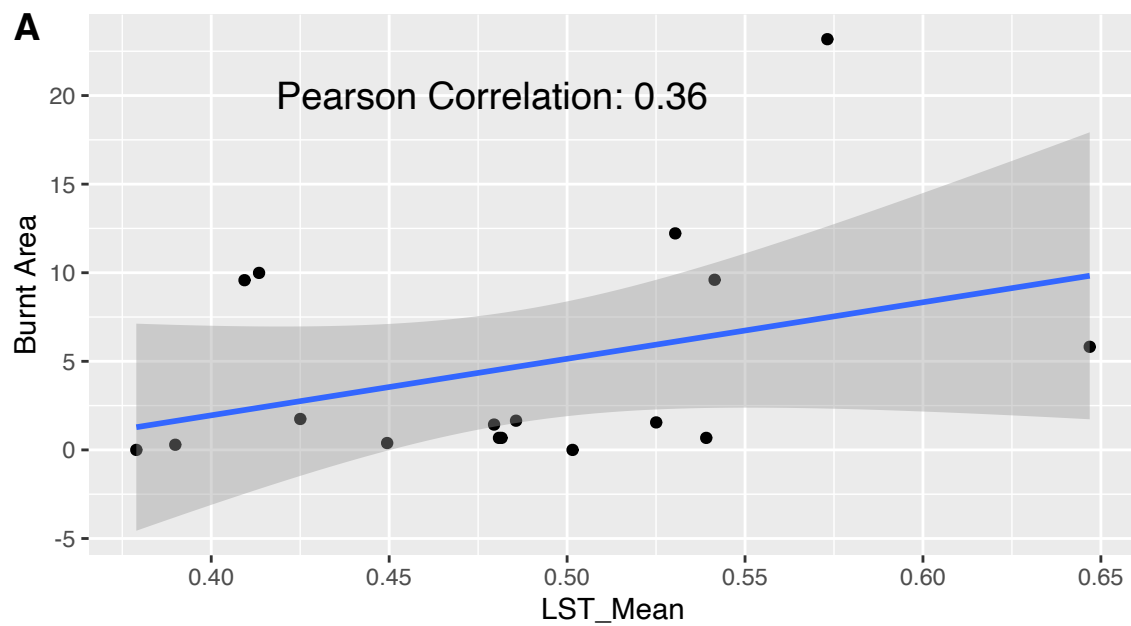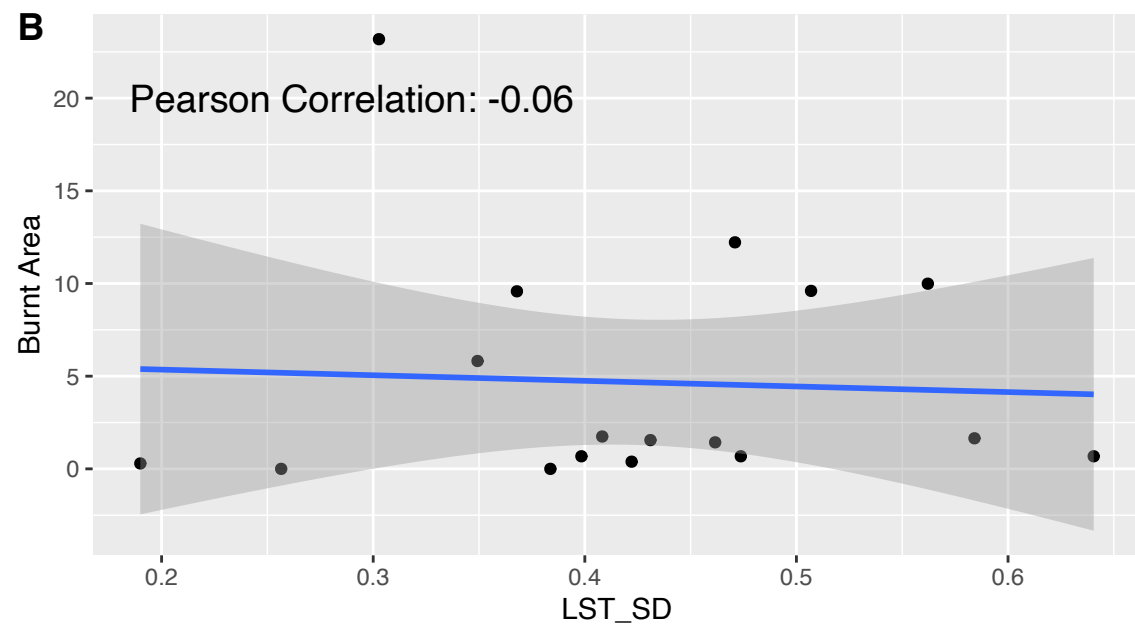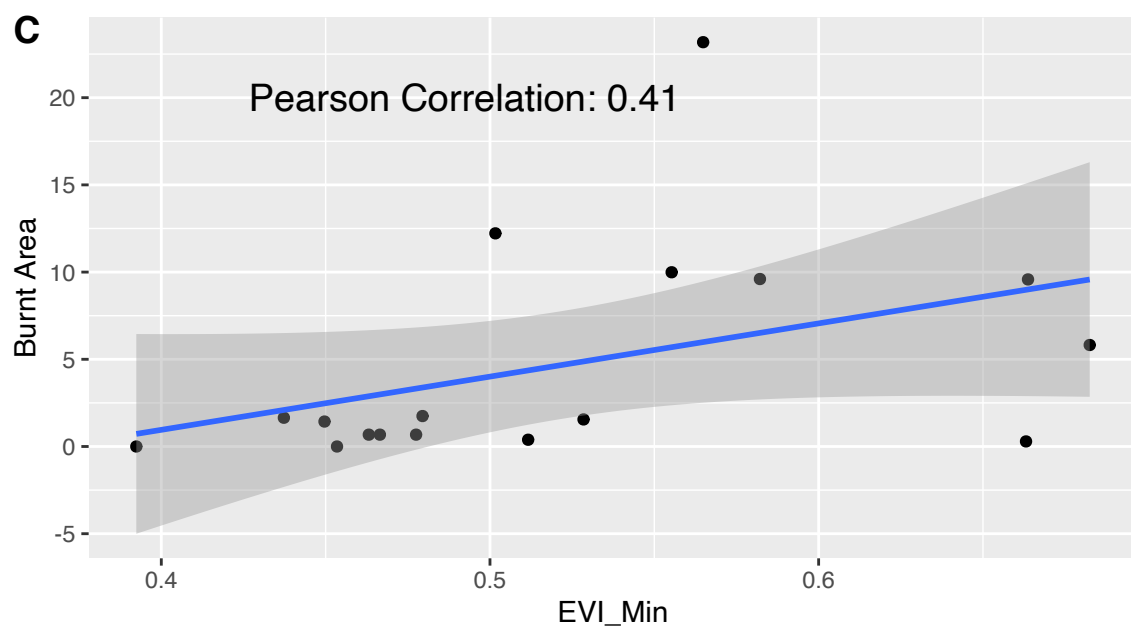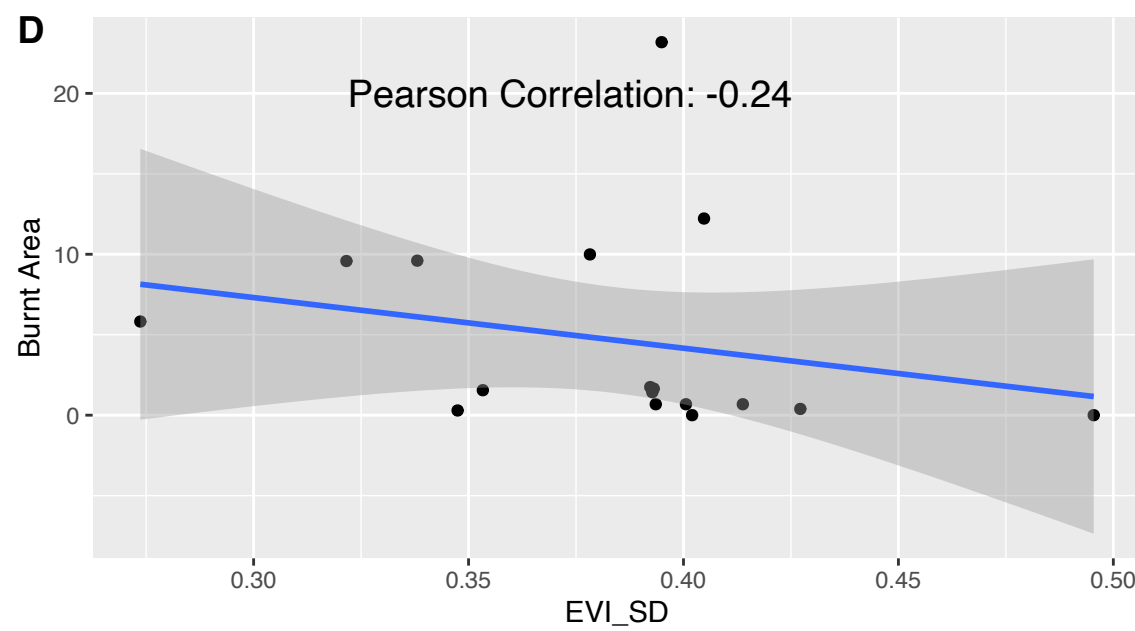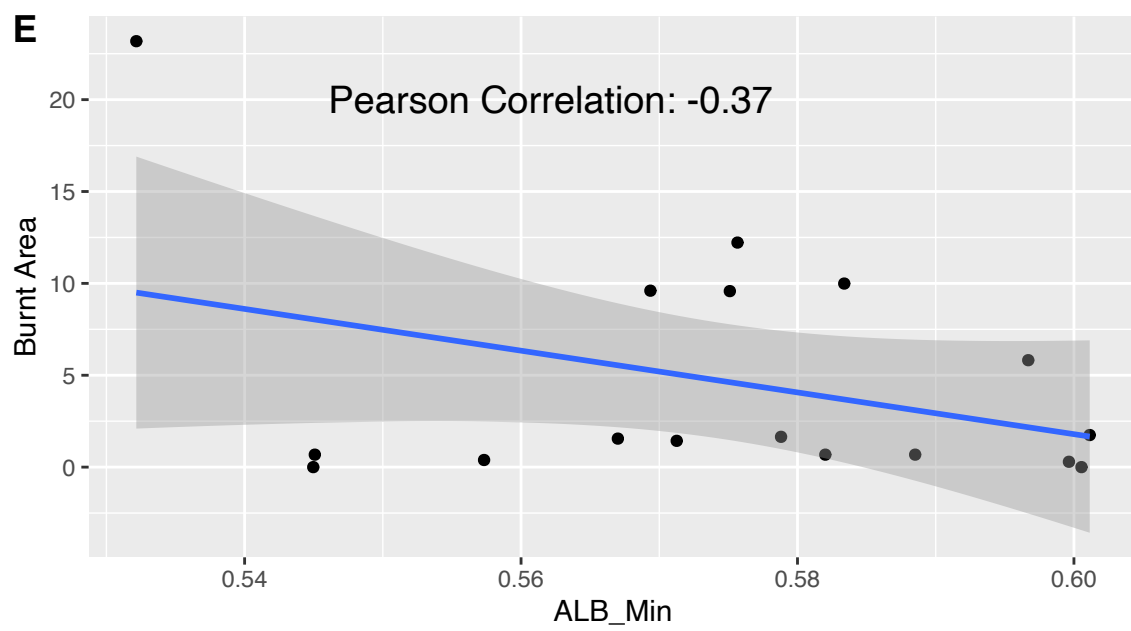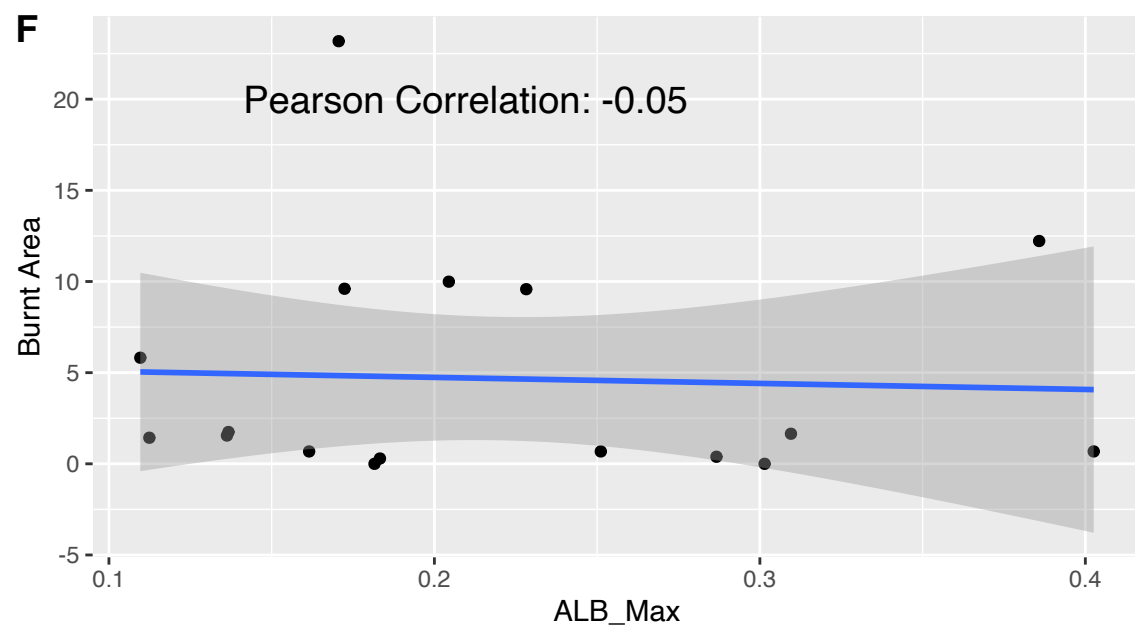

Supplement: s1 [file s1 › Figure_C2.pdf]
